# Supplementary material
Source: publisher figshare collection journal article supplement (https://gsajournals.figshare.com/ndownloader/files/28864932)
Supplement: Supplementary file 1 [file 28864932]

## Sheet: Legend
Table S15: List of DE genes identified per pairwise comparison of the developmental stages
	Legend:
	Developmental stages	Name:
	embryo	exigua_egg
	1st instar larva	exigua_EL1
	3rd instar larva	exigua_L3
	pupa	exigua_P
	female adult	exigua_F
	male adult	exigua_M
	Developmental stages of RNAseq samples
	embryo	NR01
	embryo	NR02
	embryo	NR03
	1st instar larva	NR04
	1st instar larva	NR05
	1st instar larva	NR06
	3rd instar larva	NR07
	3rd instar larva	NR08
	3rd instar larva	NR09
	pupa	NR10
	pupa	NR11
	pupa	NR12
	female adult	NR13
	female adult	NR14
	female adult	NR15
	male adult	NR16
	male adult	NR17
	male adult	NR18
	Identifiers:	Explanation (if deemed necessary)
	gene	protein ID
	Sample A
	Sample B
	baseMeanA	average normalized count values (divided by size factors)
	baseMeanB	average normalized count values (divided by size factors)
	baseMean	average normalized count values (divided by size factors)
	lfcSE	logfoldchangeStandard Error
	stat	Wald statistic
	P-value	P-value
	Padj	adjusted P-value

## Sheet: EL1-VS-egg
cluster	gene	sampleA	sampleB	baseMeanA	baseMeanB	baseMean	log2FoldChange	lfcSE	stat	pvalue	padj
3	maker-tulip_contig_809_pilon_pilon-augustus-gene-2.8-mRNA-1	exigua_EL1	exigua_egg	21394.3	39.8106	10717.1	9.08278	0.213016	42.639	0	0
5	maker-tulip_contig_182_pilon_pilon-augustus-gene-1.82-mRNA-1	exigua_EL1	exigua_egg	51056.1	10.8555	25533.5	12.1888	0.302596	40.2807	0	0
5	augustus_masked-tulip_contig_516_pilon_pilon-processed-gene-2.6-mRNA-1	exigua_EL1	exigua_egg	6984.58	251.449	3618.02	4.79573	0.1196	40.0982	0	0
3	maker-tulip_contig_209_pilon_pilon-augustus-gene-0.3-mRNA-1	exigua_EL1	exigua_egg	72964.5	3262.86	38113.7	4.48312	0.118151	37.9441	0	0
5	maker-tulip_contig_867_pilon_pilon-augustus-gene-2.14-mRNA-1	exigua_EL1	exigua_egg	37913.7	10.218	18962	11.8543	0.307329	38.5719	0	0
5	maker-tulip_contig_505_pilon_pilon-augustus-gene-3.80-mRNA-1	exigua_EL1	exigua_egg	112318	179.417	56248.6	9.28733	0.179833	51.6441	0	0
1	augustus_masked-tulip_contig_691_pilon_pilon-processed-gene-2.18-mRNA-1	exigua_EL1	exigua_egg	2600.02	70183.3	36391.7	-4.75448	0.109855	-43.2796	0	0
5	maker-tulip_contig_505_pilon_pilon-augustus-gene-3.83-mRNA-1	exigua_EL1	exigua_egg	30087.6	9.30124	15048.4	11.6279	0.318176	36.5455	2.09839e-292	3.09093e-289
-	augustus_masked-tulip_contig_313_pilon_pilon-processed-gene-0.0-mRNA-1	exigua_EL1	exigua_egg	30.3084	22628.1	11329.2	-9.54804	0.268561	-35.5526	7.56606e-277	9.90649e-274
3	maker-tulip_contig_777_pilon_pilon-augustus-gene-0.64-mRNA-1	exigua_EL1	exigua_egg	5912.44	23.9783	2968.21	7.94392	0.224214	35.4301	5.87015e-275	6.91738e-272
8	maker-tulip_contig_429_pilon_pilon-augustus-gene-3.42-mRNA-1	exigua_EL1	exigua_egg	596.206	15249.6	7922.91	-4.67657	0.1323	-35.3481	1.07147e-273	1.14783e-270
3	maker-tulip_contig_784_pilon_pilon-augustus-gene-0.0-mRNA-1	exigua_EL1	exigua_egg	4511.11	57.6301	2284.37	6.29131	0.178777	35.1908	2.76121e-271	2.7115e-268
5	augustus_masked-tulip_contig_474_pilon_pilon-processed-gene-3.6-mRNA-1	exigua_EL1	exigua_egg	138156	4.21471	69080.1	14.9926	0.439815	34.0885	1.09048e-254	9.88482e-252
1	maker-tulip_contig_159_pilon_pilon-augustus-gene-1.5-mRNA-1	exigua_EL1	exigua_egg	206.892	4910.42	2558.66	-4.56867	0.135414	-33.7385	1.57893e-249	1.32901e-246
5	maker-tulip_contig_31_pilon_pilon-augustus-gene-1.64-mRNA-1	exigua_EL1	exigua_egg	26333	7.03804	13170	11.8645	0.356343	33.2951	4.55184e-243	3.57593e-240
3	maker-tulip_contig_867_pilon_pilon-augustus-gene-0.10-mRNA-1	exigua_EL1	exigua_egg	13084	24.4954	6554.26	9.04123	0.273149	33.1	2.97447e-240	2.1907e-237
5	maker-tulip_contig_745_pilon_pilon-augustus-gene-3.10-mRNA-1	exigua_EL1	exigua_egg	19508.3	11.2004	9759.75	10.7562	0.32791	32.8024	5.44345e-236	3.77327e-233
8	maker-tulip_contig_70_pilon_pilon-augustus-gene-0.37-mRNA-1	exigua_EL1	exigua_egg	38.6495	3335.53	1687.09	-6.43119	0.196462	-32.735	4.95748e-235	3.24549e-232
4	maker-tulip_contig_276_pilon_pilon-augustus-gene-3.65-mRNA-1	exigua_EL1	exigua_egg	4208.15	40.2885	2124.22	6.69953	0.208839	32.0799	8.4151e-226	5.21913e-223
3	maker-tulip_contig_465_pilon_pilon-augustus-gene-0.2-mRNA-1	exigua_EL1	exigua_egg	25000.3	815.041	12907.7	4.93969	0.154701	31.9306	1.00519e-223	5.92256e-221
8	augustus_masked-tulip_contig_870_pilon_pilon-processed-gene-0.30-mRNA-1	exigua_EL1	exigua_egg	387.562	12020.1	6203.81	-4.95451	0.156236	-31.7117	1.07101e-220	6.00988e-218
5	maker-tulip_contig_620_pilon_pilon-augustus-gene-0.101-mRNA-1	exigua_EL1	exigua_egg	20380	6.75137	10193.4	11.5673	0.364996	31.6916	2.02718e-220	1.08583e-217
1	augustus_masked-tulip_contig_35_pilon_pilon-processed-gene-0.158-mRNA-1	exigua_EL1	exigua_egg	4112.2	210.906	2161.55	4.28453	0.136311	31.432	7.40308e-217	3.79295e-214
11	maker-tulip_contig_316_pilon_pilon-augustus-gene-3.69-mRNA-1	exigua_EL1	exigua_egg	161.803	10585.4	5373.63	-6.03209	0.193452	-31.1813	1.91005e-213	9.37837e-211
1	maker-tulip_contig_690_pilon_pilon-augustus-gene-2.67-mRNA-1	exigua_EL1	exigua_egg	240.457	8999.11	4619.78	-5.22571	0.167763	-31.1494	5.17439e-213	2.439e-210
1	maker-tulip_contig_331_pilon_pilon-augustus-gene-0.28-mRNA-1	exigua_EL1	exigua_egg	157.976	4467.4	2312.69	-4.82179	0.155473	-31.0136	3.53758e-211	1.60334e-208
8	maker-tulip_contig_281_pilon_pilon-augustus-gene-0.4-mRNA-1	exigua_EL1	exigua_egg	48.7859	13134.2	6591.5	-8.0735	0.262173	-30.7946	3.09982e-208	1.3529e-205
5	maker-tulip_contig_537_pilon_pilon-augustus-gene-2.33-mRNA-1	exigua_EL1	exigua_egg	5465.92	57.272	2761.59	6.58099	0.213865	30.7717	6.27217e-208	2.63969e-205
3	augustus_masked-tulip_contig_390_pilon_pilon-processed-gene-0.22-mRNA-1	exigua_EL1	exigua_egg	14440.8	1776.86	8108.84	3.02288	0.0984885	30.6928	7.10533e-207	2.88721e-204
1	maker-tulip_contig_547_pilon_pilon-augustus-gene-2.10-mRNA-1	exigua_EL1	exigua_egg	479.875	6439.52	3459.7	-3.74608	0.122292	-30.6323	4.54142e-206	1.78387e-203
1	maker-tulip_contig_474_pilon_pilon-augustus-gene-0.104-mRNA-1	exigua_EL1	exigua_egg	140.287	3689.8	1915.04	-4.71603	0.154766	-30.4719	6.14276e-204	2.33504e-201
1	augustus_masked-tulip_contig_307_pilon_pilon-processed-gene-1.29-mRNA-1	exigua_EL1	exigua_egg	661.348	7120.34	3890.85	-3.42827	0.115669	-29.6387	4.73645e-193	1.7442e-190
1	maker-tulip_contig_731_pilon_pilon-augustus-gene-0.22-mRNA-1	exigua_EL1	exigua_egg	387.251	5024.03	2705.64	-3.69721	0.124866	-29.6095	1.12817e-192	4.02861e-190
5	maker-tulip_contig_773_pilon_pilon-augustus-gene-2.55-mRNA-1	exigua_EL1	exigua_egg	14369.1	7.06135	7188.06	10.9901	0.372229	29.5251	1.37137e-191	4.75301e-189
1	maker-tulip_contig_407_pilon_pilon-augustus-gene-5.21-mRNA-1	exigua_EL1	exigua_egg	217.435	3461.2	1839.32	-3.99286	0.136964	-29.1526	7.73582e-187	2.60454e-184
5	maker-tulip_contig_745_pilon_pilon-augustus-gene-3.9-mRNA-1	exigua_EL1	exigua_egg	8967.3	8.38297	4487.84	10.049	0.346063	29.0382	2.16954e-185	7.10163e-183
1	maker-tulip_contig_537_pilon_pilon-augustus-gene-3.16-mRNA-1	exigua_EL1	exigua_egg	514.772	5695.86	3105.32	-3.46805	0.120165	-28.8606	3.72776e-183	1.18724e-180
5	maker-tulip_contig_384_pilon_pilon-augustus-gene-0.67-mRNA-1	exigua_EL1	exigua_egg	11808.3	5.55949	5906.94	11.0307	0.392538	28.1009	9.5482e-174	2.96095e-171
1	maker-tulip_contig_247_pilon_pilon-augustus-gene-0.16-mRNA-1	exigua_EL1	exigua_egg	869.141	13266.7	7067.9	-3.93194	0.139972	-28.091	1.26309e-173	3.81648e-171
3	maker-tulip_contig_661_pilon_pilon-augustus-gene-1.27-mRNA-1	exigua_EL1	exigua_egg	7917.2	16.1416	3966.67	8.91256	0.318552	27.9784	2.97753e-172	8.77179e-170
8	maker-tulip_contig_733_pilon_pilon-augustus-gene-0.18-mRNA-1	exigua_EL1	exigua_egg	39.5033	1650.73	845.115	-5.38356	0.196151	-27.4461	7.73907e-166	2.22432e-163
3	maker-tulip_contig_547_pilon_pilon-augustus-gene-1.4-mRNA-1	exigua_EL1	exigua_egg	2199.81	29.5495	1114.68	6.21408	0.227375	27.3297	1.88438e-164	5.28703e-162
5	maker-tulip_contig_248_pilon_pilon-augustus-gene-0.16-mRNA-1	exigua_EL1	exigua_egg	13237.9	13.6863	6625.81	9.89105	0.362706	27.2702	9.5812e-164	2.6257e-161
3	maker-tulip_contig_217_pilon_pilon-augustus-gene-1.23-mRNA-1	exigua_EL1	exigua_egg	5419.51	34.9991	2727.25	7.28876	0.269689	27.0265	7.21904e-161	1.93339e-158
5	maker-tulip_contig_516_pilon_pilon-augustus-gene-3.65-mRNA-1	exigua_EL1	exigua_egg	3410.47	27.8613	1719.17	6.92381	0.257304	26.9091	1.72063e-159	4.50576e-157
3	maker-tulip_contig_651_pilon_pilon-augustus-gene-0.32-mRNA-1	exigua_EL1	exigua_egg	4484.6	51.612	2268.11	6.4496	0.239859	26.8891	2.94446e-159	7.54293e-157
3	augustus_masked-tulip_contig_217_pilon_pilon-processed-gene-1.2-mRNA-1	exigua_EL1	exigua_egg	13766.1	112.603	6939.36	6.9384	0.262482	26.4338	5.60539e-154	1.4054e-151
8	augustus_masked-tulip_contig_584_pilon_pilon-processed-gene-3.74-mRNA-1	exigua_EL1	exigua_egg	23.936	2088.52	1056.23	-6.44307	0.243959	-26.4105	1.03918e-153	2.55119e-151
5	maker-tulip_contig_555_pilon_pilon-augustus-gene-2.36-mRNA-1	exigua_EL1	exigua_egg	16660.3	357.991	8509.13	5.53883	0.210734	26.2836	2.95534e-152	7.10729e-150
1	maker-tulip_contig_236_pilon_pilon-augustus-gene-0.28-mRNA-1	exigua_EL1	exigua_egg	525.756	4492.62	2509.19	-3.09483	0.117815	-26.2686	4.38385e-152	1.03319e-149
3	maker-tulip_contig_474_pilon_pilon-augustus-gene-5.41-mRNA-1	exigua_EL1	exigua_egg	3068.39	23.2495	1545.82	7.02825	0.268088	26.2162	1.73568e-151	4.01043e-149
6	maker-tulip_contig_368_pilon_pilon-augustus-gene-0.58-mRNA-1	exigua_EL1	exigua_egg	4971.93	12.9019	2492.42	8.57673	0.327666	26.1752	5.09443e-151	1.15448e-148
3	maker-tulip_contig_831_pilon_pilon-augustus-gene-4.45-mRNA-1	exigua_EL1	exigua_egg	2352.52	173.011	1262.77	3.76711	0.144408	26.0865	5.18601e-150	1.15306e-147
1	maker-tulip_contig_451_pilon_pilon-augustus-gene-1.45-mRNA-1	exigua_EL1	exigua_egg	7166.58	172.999	3669.79	5.37172	0.205995	26.077	6.65051e-150	1.45129e-147
5	maker-tulip_contig_626_pilon_pilon-augustus-gene-1.56-mRNA-1	exigua_EL1	exigua_egg	6727.07	322.274	3524.67	4.38173	0.168087	26.0682	8.36037e-150	1.79125e-147
1	maker-tulip_contig_547_pilon_pilon-augustus-gene-6.44-mRNA-1	exigua_EL1	exigua_egg	693.138	8068.38	4380.76	-3.54092	0.135911	-26.0532	1.2377e-149	2.60447e-147
8	maker-tulip_contig_281_pilon_pilon-augustus-gene-0.8-mRNA-1	exigua_EL1	exigua_egg	25.6759	2108.76	1067.22	-6.36351	0.244959	-25.9779	8.80809e-149	1.81312e-146
6	maker-tulip_contig_287_pilon_pilon-augustus-gene-1.23-mRNA-1	exigua_EL1	exigua_egg	2969.42	13.4021	1491.41	7.81944	0.30101	25.9774	8.92402e-149	1.81312e-146
8	maker-tulip_contig_309_pilon_pilon-augustus-gene-0.39-mRNA-1	exigua_EL1	exigua_egg	29.0985	1607.3	818.199	-5.78394	0.224754	-25.7345	4.80921e-146	9.60537e-144
-	maker-tulip_contig_44_pilon_pilon-augustus-gene-0.37-mRNA-1	exigua_EL1	exigua_egg	6.41914	5815.03	2910.73	-9.8283	0.385546	-25.4919	2.42451e-143	4.76173e-141
3	maker-tulip_contig_831_pilon_pilon-augustus-gene-4.66-mRNA-1	exigua_EL1	exigua_egg	9194.78	514.424	4854.6	4.16086	0.163241	25.489	2.60954e-143	5.04112e-141
5	maker-tulip_contig_527_pilon_pilon-augustus-gene-3.11-mRNA-1	exigua_EL1	exigua_egg	3099.77	9.24142	1554.51	8.39743	0.330277	25.4254	1.32107e-142	2.51088e-140
3	augustus_masked-tulip_contig_560_pilon_pilon-processed-gene-1.18-mRNA-1	exigua_EL1	exigua_egg	6004.53	30.4704	3017.5	7.63157	0.300517	25.3948	2.88159e-142	5.38995e-140
1	maker-tulip_contig_326_pilon_pilon-augustus-gene-0.8-mRNA-1	exigua_EL1	exigua_egg	386.398	5357.38	2871.89	-3.79293	0.149851	-25.3113	2.39608e-141	4.41179e-139
4	augustus_masked-tulip_contig_211_pilon_pilon-processed-gene-4.20-mRNA-1	exigua_EL1	exigua_egg	3064.62	7.67555	1536.15	8.62508	0.340867	25.3033	2.93522e-141	5.32132e-139
3	maker-tulip_contig_451_pilon_pilon-augustus-gene-1.46-mRNA-1	exigua_EL1	exigua_egg	5668.58	186.964	2927.77	4.92495	0.194756	25.2878	4.34589e-141	7.75939e-139
1	maker-tulip_contig_620_pilon_pilon-augustus-gene-0.51-mRNA-1	exigua_EL1	exigua_egg	279.289	3672.73	1976.01	-3.71654	0.147042	-25.2754	5.96096e-141	1.04842e-138
1	maker-tulip_contig_715_pilon_pilon-augustus-gene-4.44-mRNA-1	exigua_EL1	exigua_egg	593.491	5058.28	2825.89	-3.09114	0.122923	-25.147	1.52237e-139	2.63819e-137
3	maker-tulip_contig_323_pilon_pilon-augustus-gene-1.11-mRNA-1	exigua_EL1	exigua_egg	2081.73	12.8668	1047.3	7.31987	0.29193	25.0741	9.54538e-139	1.63019e-136
11	maker-tulip_contig_931_pilon_pilon-augustus-gene-1.38-mRNA-1	exigua_EL1	exigua_egg	20.9271	1696.53	858.727	-6.33801	0.253758	-24.9766	1.09739e-137	1.84738e-135
1	augustus_masked-tulip_contig_126_pilon_pilon-processed-gene-0.47-mRNA-1	exigua_EL1	exigua_egg	2271.68	109.22	1190.45	4.3754	0.175305	24.9589	1.711e-137	2.83977e-135
5	maker-tulip_contig_741_pilon_pilon-augustus-gene-0.5-mRNA-1	exigua_EL1	exigua_egg	10505.1	6.94326	5256.02	10.5999	0.428058	24.7629	2.25322e-135	3.68778e-133
1	maker-tulip_contig_237_pilon_pilon-augustus-gene-0.45-mRNA-1	exigua_EL1	exigua_egg	409.335	7709.74	4059.54	-4.23488	0.171184	-24.7387	4.10071e-135	6.61956e-133
1	maker-tulip_contig_611_pilon_pilon-augustus-gene-3.37-mRNA-1	exigua_EL1	exigua_egg	1845.5	16127.1	8986.3	-3.12737	0.126693	-24.6847	1.56239e-134	2.488e-132
1	maker-tulip_contig_145_pilon_pilon-augustus-gene-2.51-mRNA-1	exigua_EL1	exigua_egg	199.585	2642.15	1420.87	-3.72644	0.151063	-24.6682	2.34688e-134	3.68742e-132
1	maker-tulip_contig_531_pilon_pilon-augustus-gene-7.19-mRNA-1	exigua_EL1	exigua_egg	3498.05	98.5071	1798.28	5.15619	0.209955	24.5586	3.50454e-133	5.43388e-131
1	maker-tulip_contig_327_pilon_pilon-augustus-gene-9.8-mRNA-1	exigua_EL1	exigua_egg	53.255	1355.25	704.253	-4.66928	0.190805	-24.4714	2.97824e-132	4.55788e-130
1	maker-tulip_contig_95_pilon_pilon-augustus-gene-0.56-mRNA-1	exigua_EL1	exigua_egg	1477.66	30.1079	753.882	5.63055	0.230688	24.4077	1.41837e-131	2.14283e-129
5	augustus_masked-tulip_contig_39_pilon_pilon-processed-gene-1.57-mRNA-1	exigua_EL1	exigua_egg	5096.73	29.3543	2563.04	7.44796	0.305362	24.3906	2.15384e-131	3.21277e-129
5	augustus_masked-tulip_contig_781_pilon_pilon-processed-gene-0.4-mRNA-1	exigua_EL1	exigua_egg	5842.83	5.49548	2924.16	10.0187	0.411124	24.369	3.64334e-131	5.36664e-129
1	maker-tulip_contig_15_pilon_pilon-augustus-gene-1.13-mRNA-1	exigua_EL1	exigua_egg	1184.22	9751.86	5468.04	-3.04183	0.125971	-24.147	8.02086e-129	1.16689e-126
3	maker-tulip_contig_320_pilon_pilon-augustus-gene-0.1-mRNA-1	exigua_EL1	exigua_egg	1919.63	20.4376	970.031	6.53476	0.270859	24.126	1.33313e-128	1.91581e-126
1	maker-tulip_contig_711_pilon_pilon-augustus-gene-2.65-mRNA-1	exigua_EL1	exigua_egg	2560.26	40.1223	1300.19	5.99919	0.248704	24.1218	1.47488e-128	2.09398e-126
1	maker-tulip_contig_407_pilon_pilon-augustus-gene-6.58-mRNA-1	exigua_EL1	exigua_egg	447.856	7454.66	3951.26	-4.05698	0.168596	-24.0634	6.05088e-128	8.48852e-126
3	maker-tulip_contig_732_pilon_pilon-augustus-gene-3.13-mRNA-1	exigua_EL1	exigua_egg	1506.35	12.8536	759.601	6.88549	0.286686	24.0175	1.82511e-127	2.53025e-125
1	maker-tulip_contig_33_pilon_pilon-augustus-gene-3.31-mRNA-1	exigua_EL1	exigua_egg	219.808	3711.04	1965.42	-4.07683	0.169856	-24.0017	2.66722e-127	3.65471e-125
1	maker-tulip_contig_340_pilon_pilon-augustus-gene-0.26-mRNA-1	exigua_EL1	exigua_egg	1386.13	65.99	726.062	4.39191	0.183622	23.9183	1.97728e-126	2.67819e-124
3	maker-tulip_contig_815_pilon_pilon-augustus-gene-1.4-mRNA-1	exigua_EL1	exigua_egg	2463.41	200.121	1331.77	3.6213	0.151485	23.9053	2.6948e-126	3.60858e-124
1	maker-tulip_contig_336_pilon_pilon-augustus-gene-0.120-mRNA-1	exigua_EL1	exigua_egg	482.617	4358.58	2420.6	-3.17477	0.132945	-23.8804	4.90146e-126	6.48975e-124
5	maker-tulip_contig_860_pilon_pilon-augustus-gene-4.0-mRNA-1	exigua_EL1	exigua_egg	2870.04	34.9267	1452.48	6.35994	0.268536	23.6837	5.30558e-124	6.94677e-122
5	maker-tulip_contig_102_pilon_pilon-augustus-gene-0.49-mRNA-1	exigua_EL1	exigua_egg	3709.77	6.22434	1858	9.26523	0.391291	23.6786	5.98697e-124	7.75279e-122
3	maker-tulip_contig_806_pilon_pilon-augustus-gene-2.31-mRNA-1	exigua_EL1	exigua_egg	3454.84	370.83	1912.84	3.21891	0.136994	23.4968	4.39848e-122	5.63387e-120
1	maker-tulip_contig_217_pilon_pilon-augustus-gene-0.24-mRNA-1	exigua_EL1	exigua_egg	2687.59	30118.4	16403	-3.48618	0.149092	-23.3828	6.3988e-121	8.1079e-119
6	maker-tulip_contig_199_pilon_pilon-augustus-gene-4.31-mRNA-1	exigua_EL1	exigua_egg	2690.77	8.94885	1349.86	8.24754	0.352787	23.3783	7.11397e-121	8.91819e-119
1	maker-tulip_contig_66_pilon_pilon-augustus-gene-2.37-mRNA-1	exigua_EL1	exigua_egg	191.876	2673.51	1432.69	-3.7997	0.162551	-23.3754	7.61132e-121	9.44124e-119
3	maker-tulip_contig_831_pilon_pilon-augustus-gene-4.3-mRNA-1	exigua_EL1	exigua_egg	6044.77	597.706	3321.24	3.33777	0.143055	23.3321	2.09557e-120	2.57231e-118
1	maker-tulip_contig_616_pilon_pilon-augustus-gene-0.35-mRNA-1	exigua_EL1	exigua_egg	118.792	2233.53	1176.16	-4.23334	0.182106	-23.2465	1.54245e-119	1.87384e-117
1	maker-tulip_contig_248_pilon_pilon-augustus-gene-0.12-mRNA-1	exigua_EL1	exigua_egg	32.2688	890.87	461.57	-4.78732	0.206048	-23.234	2.06596e-119	2.48422e-117
3	maker-tulip_contig_809_pilon_pilon-augustus-gene-4.12-mRNA-1	exigua_EL1	exigua_egg	4075.63	160.796	2118.21	4.66385	0.201165	23.1843	6.5637e-119	7.81279e-117
4	maker-tulip_contig_707_pilon_pilon-augustus-gene-0.70-mRNA-1	exigua_EL1	exigua_egg	3963.87	16.5122	1990.19	7.92024	0.341913	23.1645	1.0386e-118	1.22389e-116
8	maker-tulip_contig_523_pilon_pilon-augustus-gene-0.76-mRNA-1	exigua_EL1	exigua_egg	9.45055	1455.85	732.651	-7.26897	0.31467	-23.1003	4.59938e-118	5.36624e-116
1	maker-tulip_contig_3_pilon_pilon-augustus-gene-3.32-mRNA-1	exigua_EL1	exigua_egg	1777.05	77.3605	927.203	4.51913	0.195647	23.0983	4.81138e-118	5.55856e-116
1	maker-tulip_contig_662_pilon_pilon-augustus-gene-1.8-mRNA-1	exigua_EL1	exigua_egg	87.8149	1711.15	899.482	-4.28525	0.185828	-23.0603	1.15988e-117	1.32699e-115
8	maker-tulip_contig_603_pilon_pilon-augustus-gene-3.72-mRNA-1	exigua_EL1	exigua_egg	13.9838	1568.09	791.038	-6.80771	0.295411	-23.0449	1.65423e-117	1.87437e-115
5	maker-tulip_contig_603_pilon_pilon-augustus-gene-3.65-mRNA-1	exigua_EL1	exigua_egg	13388.3	2.82333	6695.57	12.2101	0.530851	23.0009	4.5632e-117	5.12121e-115
3	maker-tulip_contig_827_pilon_pilon-augustus-gene-1.14-mRNA-1	exigua_EL1	exigua_egg	3036.55	13.123	1524.84	7.85767	0.342284	22.9566	1.26624e-116	1.40767e-114
1	maker-tulip_contig_331_pilon_pilon-augustus-gene-2.7-mRNA-1	exigua_EL1	exigua_egg	1295.28	100.072	697.677	3.69714	0.161212	22.9334	2.15993e-116	2.37875e-114
-	augustus_masked-tulip_contig_586_pilon_pilon-processed-gene-5.14-mRNA-1	exigua_EL1	exigua_egg	1276.8	51.6542	664.225	4.63403	0.20214	22.9249	2.62595e-116	2.86521e-114
1	maker-tulip_contig_407_pilon_pilon-augustus-gene-6.31-mRNA-1	exigua_EL1	exigua_egg	211.554	4755.61	2483.58	-4.49036	0.195896	-22.9221	2.79449e-116	3.02113e-114
1	maker-tulip_contig_827_pilon_pilon-augustus-gene-2.64-mRNA-1	exigua_EL1	exigua_egg	1081.52	56.859	569.189	4.24937	0.185749	22.8769	7.88384e-116	8.44574e-114
3	maker-tulip_contig_356_pilon_pilon-augustus-gene-1.38-mRNA-1	exigua_EL1	exigua_egg	2073.09	8.38701	1040.74	7.98844	0.349905	22.8303	2.29274e-115	2.43403e-113
1	maker-tulip_contig_812_pilon_pilon-augustus-gene-0.39-mRNA-1	exigua_EL1	exigua_egg	680.16	5290.07	2985.12	-2.95931	0.130532	-22.6711	8.64733e-114	9.09823e-112
3	augustus_masked-tulip_contig_289_pilon_pilon-processed-gene-0.9-mRNA-1	exigua_EL1	exigua_egg	2204.62	18.4056	1111.51	6.92297	0.30583	22.6367	1.88713e-113	1.96796e-111
11	maker-tulip_contig_474_pilon_pilon-augustus-gene-4.28-mRNA-1	exigua_EL1	exigua_egg	15.8644	5190.31	2603.09	-8.35556	0.370661	-22.5423	1.59697e-112	1.65077e-110
1	augustus_masked-tulip_contig_110_pilon_pilon-processed-gene-3.15-mRNA-1	exigua_EL1	exigua_egg	337.365	3249.18	1793.27	-3.2673	0.14518	-22.5052	3.69034e-112	3.78147e-110
1	maker-tulip_contig_514_pilon_pilon-augustus-gene-0.16-mRNA-1	exigua_EL1	exigua_egg	1333.13	36.8934	685.012	5.16335	0.229526	22.4958	4.5674e-112	4.63985e-110
3	augustus_masked-tulip_contig_916_pilon_pilon-processed-gene-0.28-mRNA-1	exigua_EL1	exigua_egg	2614.13	256.917	1435.52	3.3462	0.149136	22.4373	1.70462e-111	1.71685e-109
3	maker-tulip_contig_507_pilon_pilon-augustus-gene-2.36-mRNA-1	exigua_EL1	exigua_egg	1493.76	68.2665	781.013	4.44578	0.198204	22.4303	1.99365e-111	1.99095e-109
3	maker-tulip_contig_195_pilon_pilon-augustus-gene-0.24-mRNA-1	exigua_EL1	exigua_egg	1328.12	11.1696	669.646	6.91742	0.308722	22.4066	3.39346e-111	3.36038e-109
3	maker-tulip_contig_126_pilon_pilon-augustus-gene-2.229-mRNA-1	exigua_EL1	exigua_egg	1550.19	7.87334	779.032	7.63822	0.341139	22.3903	4.88867e-111	4.80068e-109
1	augustus_masked-tulip_contig_168_pilon_pilon-processed-gene-0.96-mRNA-1	exigua_EL1	exigua_egg	577.568	4388.02	2482.79	-2.9255	0.130671	-22.3883	5.12223e-111	4.98846e-109
1	maker-tulip_contig_827_pilon_pilon-augustus-gene-2.75-mRNA-1	exigua_EL1	exigua_egg	2684.33	14926.7	8805.54	-2.47527	0.110689	-22.3624	9.1471e-111	8.8352e-109
5	augustus_masked-tulip_contig_476_pilon_pilon-processed-gene-0.30-mRNA-1	exigua_EL1	exigua_egg	1862.06	76.1089	969.083	4.61134	0.207165	22.2593	9.16384e-110	8.77941e-108
1	maker-tulip_contig_609_pilon_pilon-augustus-gene-0.20-mRNA-1	exigua_EL1	exigua_egg	1251.59	50.7667	651.176	4.62745	0.208442	22.2002	3.41787e-109	3.24808e-107
1	maker-tulip_contig_662_pilon_pilon-augustus-gene-1.16-mRNA-1	exigua_EL1	exigua_egg	401.46	3181.03	1791.24	-2.98592	0.134639	-22.1773	5.69466e-109	5.36847e-107
1	augustus_masked-tulip_contig_715_pilon_pilon-processed-gene-5.14-mRNA-1	exigua_EL1	exigua_egg	113.935	1633.52	873.725	-3.84075	0.173743	-22.1059	2.77069e-108	2.59126e-106
1	maker-tulip_contig_69_pilon_pilon-augustus-gene-0.15-mRNA-1	exigua_EL1	exigua_egg	3310.15	20390.6	11850.4	-2.6229	0.118658	-22.1047	2.85007e-108	2.64451e-106
5	maker-tulip_contig_181_pilon_pilon-augustus-gene-1.5-mRNA-1	exigua_EL1	exigua_egg	3561.9	6.35408	1784.13	9.12982	0.413124	22.0995	3.19892e-108	2.94501e-106
3	maker-tulip_contig_81_pilon_pilon-augustus-gene-2.3-mRNA-1	exigua_EL1	exigua_egg	1517.6	17.9808	767.789	6.39743	0.289846	22.0718	5.89411e-108	5.3842e-106
5	maker-tulip_contig_278_pilon_pilon-augustus-gene-0.56-mRNA-1	exigua_EL1	exigua_egg	2729.14	170.345	1449.74	4.00342	0.181932	22.0051	2.57473e-107	2.3339e-105
1	maker-tulip_contig_37_pilon_pilon-augustus-gene-2.20-mRNA-1	exigua_EL1	exigua_egg	148.526	1515.21	831.866	-3.35069	0.15249	-21.9732	5.19336e-107	4.67165e-105
1	maker-tulip_contig_55_pilon_pilon-augustus-gene-1.39-mRNA-1	exigua_EL1	exigua_egg	437.681	2473.97	1455.83	-2.49884	0.113892	-21.9404	1.06924e-106	9.54538e-105
1	maker-tulip_contig_205_pilon_pilon-augustus-gene-0.17-mRNA-1	exigua_EL1	exigua_egg	374.975	2765.64	1570.31	-2.88239	0.131518	-21.9163	1.8165e-106	1.60945e-104
11	maker-tulip_contig_674_pilon_pilon-augustus-gene-9.11-mRNA-1	exigua_EL1	exigua_egg	7.36086	2352.47	1179.92	-8.32858	0.381099	-21.8541	7.10765e-106	6.25049e-104
1	maker-tulip_contig_234_pilon_pilon-augustus-gene-2.33-mRNA-1	exigua_EL1	exigua_egg	111.167	1358.9	735.033	-3.61071	0.165485	-21.819	1.53147e-105	1.3368e-103
1	maker-tulip_contig_778_pilon_pilon-augustus-gene-1.1-mRNA-1	exigua_EL1	exigua_egg	208.787	3497.61	1853.2	-4.06555	0.186502	-21.799	2.37226e-105	2.05549e-103
1	maker-tulip_contig_362_pilon_pilon-augustus-gene-4.24-mRNA-1	exigua_EL1	exigua_egg	1038.66	6368.62	3703.64	-2.61616	0.120249	-21.7562	6.03504e-105	5.19102e-103
1	maker-tulip_contig_441_pilon_pilon-augustus-gene-5.21-mRNA-1	exigua_EL1	exigua_egg	587.331	3731.92	2159.63	-2.66776	0.122651	-21.7508	6.78986e-105	5.79795e-103
5	augustus_masked-tulip_contig_81_pilon_pilon-processed-gene-4.4-mRNA-1	exigua_EL1	exigua_egg	2038.37	11.6095	1024.99	7.45143	0.342589	21.7503	6.85653e-105	5.81276e-103
1	maker-tulip_contig_669_pilon_pilon-augustus-gene-2.92-mRNA-1	exigua_EL1	exigua_egg	999.485	12960.1	6979.81	-3.6966	0.17021	-21.7179	1.38912e-104	1.16924e-102
1	maker-tulip_contig_531_pilon_pilon-augustus-gene-6.6-mRNA-1	exigua_EL1	exigua_egg	43.1823	964.178	503.68	-4.48043	0.206305	-21.7175	1.40164e-104	1.17141e-102
1	augustus_masked-tulip_contig_15_pilon_pilon-processed-gene-2.9-mRNA-1	exigua_EL1	exigua_egg	1377.16	32.993	705.076	5.37824	0.247889	21.6962	2.22814e-104	1.84904e-102
1	maker-tulip_contig_477_pilon_pilon-augustus-gene-0.29-mRNA-1	exigua_EL1	exigua_egg	630.785	6892.3	3761.54	-3.44968	0.159265	-21.66	4.88855e-104	4.02844e-102
5	maker-tulip_contig_854_pilon_pilon-augustus-gene-2.29-mRNA-1	exigua_EL1	exigua_egg	1118.14	30.9101	574.525	5.18187	0.239525	21.634	8.60708e-104	7.04346e-102
3	maker-tulip_contig_732_pilon_pilon-augustus-gene-6.12-mRNA-1	exigua_EL1	exigua_egg	3205.88	4.53634	1605.21	9.44882	0.43692	21.626	1.02317e-103	8.31522e-102
5	maker-tulip_contig_132_pilon_pilon-augustus-gene-0.4-mRNA-1	exigua_EL1	exigua_egg	1354.69	18.0315	686.362	6.25113	0.291123	21.4724	2.81841e-102	2.27481e-100
5	maker-tulip_contig_326_pilon_pilon-augustus-gene-1.0-mRNA-1	exigua_EL1	exigua_egg	1930.53	9.09599	969.813	7.71875	0.359615	21.4639	3.38393e-102	2.71267e-100
1	maker-tulip_contig_341_pilon_pilon-augustus-gene-0.0-mRNA-1	exigua_EL1	exigua_egg	250.756	1951.01	1100.88	-2.95991	0.137975	-21.4525	4.32631e-102	3.44468e-100
3	maker-tulip_contig_212_pilon_pilon-augustus-gene-1.110-mRNA-1	exigua_EL1	exigua_egg	1344.08	11.2743	677.678	6.93042	0.323097	21.45	4.56832e-102	3.61296e-100
1	maker-tulip_contig_89_pilon_pilon-augustus-gene-0.30-mRNA-1	exigua_EL1	exigua_egg	759.845	24.4454	392.145	4.96122	0.231434	21.4369	6.05764e-102	4.75888e-100
3	maker-tulip_contig_181_pilon_pilon-augustus-gene-0.18-mRNA-1	exigua_EL1	exigua_egg	798.741	17.0333	407.887	5.55653	0.259256	21.4326	6.64281e-102	5.18403e-100
1	maker-tulip_contig_211_pilon_pilon-augustus-gene-2.39-mRNA-1	exigua_EL1	exigua_egg	794.512	5366.76	3080.63	-2.75591	0.128704	-21.4127	1.01739e-101	7.88745e-100
1	maker-tulip_contig_527_pilon_pilon-augustus-gene-1.42-mRNA-1	exigua_EL1	exigua_egg	223.562	1809.82	1016.69	-3.01761	0.141018	-21.3988	1.36981e-101	1.05502e-99
1	maker-tulip_contig_394_pilon_pilon-augustus-gene-2.3-mRNA-1	exigua_EL1	exigua_egg	37.4419	909.558	473.5	-4.60297	0.215416	-21.3678	2.66452e-101	2.03887e-99
1	augustus_masked-tulip_contig_394_pilon_pilon-processed-gene-4.0-mRNA-1	exigua_EL1	exigua_egg	115.183	2045.94	1080.56	-4.15029	0.194489	-21.3394	4.88907e-101	3.71695e-99
1	maker-tulip_contig_187_pilon_pilon-augustus-gene-1.26-mRNA-1	exigua_EL1	exigua_egg	196.853	3920.63	2058.74	-4.31538	0.203051	-21.2526	3.11681e-100	2.35439e-98
1	augustus_masked-tulip_contig_659_pilon_pilon-processed-gene-0.2-mRNA-1	exigua_EL1	exigua_egg	581.643	3310.8	1946.22	-2.50899	0.118454	-21.1811	1.42751e-99	1.07145e-97
8	maker-tulip_contig_276_pilon_pilon-augustus-gene-1.13-mRNA-1	exigua_EL1	exigua_egg	18.23	751.681	384.956	-5.36433	0.253268	-21.1804	1.44693e-99	1.07916e-97
1	maker-tulip_contig_829_pilon_pilon-augustus-gene-1.51-mRNA-1	exigua_EL1	exigua_egg	3840.96	3.98615	1922.47	9.94622	0.469836	21.1696	1.82216e-99	1.35046e-97
3	maker-tulip_contig_831_pilon_pilon-augustus-gene-3.23-mRNA-1	exigua_EL1	exigua_egg	809.936	14.1343	412.035	5.84084	0.277682	21.0343	3.18722e-98	2.34739e-96
1	maker-tulip_contig_159_pilon_pilon-augustus-gene-1.50-mRNA-1	exigua_EL1	exigua_egg	98.7039	1009.52	554.113	-3.35483	0.159517	-21.0312	3.39726e-98	2.48654e-96
1	augustus_masked-tulip_contig_318_pilon_pilon-processed-gene-0.72-mRNA-1	exigua_EL1	exigua_egg	2411.62	133.935	1272.78	4.16857	0.19867	20.9824	9.50423e-98	6.91345e-96
1	maker-tulip_contig_43_pilon_pilon-augustus-gene-6.31-mRNA-1	exigua_EL1	exigua_egg	656.089	4480.59	2568.34	-2.77188	0.132322	-20.9479	1.95958e-97	1.41667e-95
6	augustus_masked-tulip_contig_334_pilon_pilon-processed-gene-4.5-mRNA-1	exigua_EL1	exigua_egg	7342.82	2.86994	3672.85	11.342	0.542626	20.902	5.12998e-97	3.68608e-95
5	augustus_masked-tulip_contig_691_pilon_pilon-processed-gene-0.66-mRNA-1	exigua_EL1	exigua_egg	1890.04	5.67011	947.856	8.38479	0.401971	20.8592	1.25746e-96	8.98056e-95
1	maker-tulip_contig_606_pilon_pilon-augustus-gene-0.8-mRNA-1	exigua_EL1	exigua_egg	96.3125	1250.87	673.591	-3.69823	0.177711	-20.8104	3.4839e-96	2.47315e-94
3	maker-tulip_contig_556_pilon_pilon-augustus-gene-0.17-mRNA-1	exigua_EL1	exigua_egg	5925.03	1313.19	3619.11	2.17377	0.104512	20.7992	4.39939e-96	3.09591e-94
8	maker-tulip_contig_531_pilon_pilon-augustus-gene-3.5-mRNA-1	exigua_EL1	exigua_egg	17.9015	675.28	346.591	-5.23416	0.251654	-20.7991	4.41373e-96	3.09591e-94
1	maker-tulip_contig_331_pilon_pilon-augustus-gene-2.0-mRNA-1	exigua_EL1	exigua_egg	5519.27	37931.3	21725.3	-2.78083	0.133863	-20.7737	7.48564e-96	5.21958e-94
1	augustus_masked-tulip_contig_711_pilon_pilon-processed-gene-1.17-mRNA-1	exigua_EL1	exigua_egg	414.365	2164.68	1289.52	-2.38499	0.11491	-20.7552	1.09916e-95	7.61909e-94
-	maker-tulip_contig_287_pilon_pilon-augustus-gene-0.0-mRNA-1	exigua_EL1	exigua_egg	1078.08	17.1687	547.627	5.96464	0.287631	20.7371	1.60209e-95	1.10404e-93
8	maker-tulip_contig_114_pilon_pilon-augustus-gene-0.2-mRNA-1	exigua_EL1	exigua_egg	15.5814	1238.36	626.972	-6.31553	0.305414	-20.6786	5.39483e-95	3.69609e-93
1	maker-tulip_contig_519_pilon_pilon-augustus-gene-2.39-mRNA-1	exigua_EL1	exigua_egg	179.861	1820.41	1000.14	-3.3386	0.161601	-20.6595	8.01336e-95	5.45245e-93
3	maker-tulip_contig_211_pilon_pilon-augustus-gene-2.27-mRNA-1	exigua_EL1	exigua_egg	1363.34	13.5184	688.43	6.6901	0.32383	20.6593	8.05097e-95	5.45245e-93
1	maker-tulip_contig_327_pilon_pilon-augustus-gene-8.9-mRNA-1	exigua_EL1	exigua_egg	1272.2	65.124	668.664	4.28911	0.207701	20.6504	9.69014e-95	6.52506e-93
1	maker-tulip_contig_515_pilon_pilon-augustus-gene-2.1-mRNA-1	exigua_EL1	exigua_egg	117.74	2375.87	1246.8	-4.33443	0.210013	-20.6389	1.22831e-94	8.22412e-93
3	augustus_masked-tulip_contig_632_pilon_pilon-processed-gene-3.3-mRNA-1	exigua_EL1	exigua_egg	2132	5.02671	1068.51	8.74976	0.424214	20.6258	1.61085e-94	1.07244e-92
3	maker-tulip_contig_43_pilon_pilon-augustus-gene-6.20-mRNA-1	exigua_EL1	exigua_egg	1991.33	7.66218	999.496	8.05855	0.391878	20.5639	5.77927e-94	3.82601e-92
5	augustus_masked-tulip_contig_783_pilon_pilon-processed-gene-0.14-mRNA-1	exigua_EL1	exigua_egg	1611.83	148.822	880.328	3.43948	0.167365	20.5508	7.5745e-94	4.98648e-92
1	maker-tulip_contig_584_pilon_pilon-augustus-gene-0.9-mRNA-1	exigua_EL1	exigua_egg	572.324	4737.57	2654.95	-3.04925	0.14859	-20.5212	1.39098e-93	9.10628e-92
1	maker-tulip_contig_675_pilon_pilon-augustus-gene-1.2-mRNA-1	exigua_EL1	exigua_egg	13.0663	927.457	470.262	-6.14811	0.299905	-20.5002	2.14561e-93	1.3969e-91
1	maker-tulip_contig_895_pilon_pilon-augustus-gene-2.28-mRNA-1	exigua_EL1	exigua_egg	4647.81	652.541	2650.18	2.83335	0.138296	20.4875	2.7821e-93	1.80134e-91
1	maker-tulip_contig_448_pilon_pilon-augustus-gene-1.25-mRNA-1	exigua_EL1	exigua_egg	1950.71	10320.8	6135.76	-2.40343	0.117365	-20.4783	3.36202e-93	2.16492e-91
1	maker-tulip_contig_826_pilon_pilon-augustus-gene-0.12-mRNA-1	exigua_EL1	exigua_egg	4538.37	396.485	2467.43	3.51534	0.171963	20.4425	7.01136e-93	4.49032e-91
-	maker-tulip_contig_623_pilon_pilon-augustus-gene-4.86-mRNA-1	exigua_EL1	exigua_egg	255.864	3423.53	1839.7	-3.74265	0.183113	-20.439	7.52647e-93	4.79416e-91
8	maker-tulip_contig_211_pilon_pilon-augustus-gene-2.47-mRNA-1	exigua_EL1	exigua_egg	13.351	1097.78	555.563	-6.35846	0.312165	-20.3689	3.15634e-92	1.99969e-90
3	augustus_masked-tulip_contig_690_pilon_pilon-processed-gene-3.78-mRNA-1	exigua_EL1	exigua_egg	3453.95	3.43753	1728.69	9.93599	0.488227	20.3512	4.53158e-92	2.85562e-90
1	maker-tulip_contig_138_pilon_pilon-augustus-gene-0.35-mRNA-1	exigua_EL1	exigua_egg	585.521	7093.3	3839.41	-3.59841	0.176834	-20.3491	4.72841e-92	2.96308e-90
5	augustus_masked-tulip_contig_234_pilon_pilon-processed-gene-3.13-mRNA-1	exigua_EL1	exigua_egg	1866.26	44.6454	955.454	5.39161	0.264959	20.3489	4.7524e-92	2.96308e-90
4	maker-tulip_contig_690_pilon_pilon-augustus-gene-1.18-mRNA-1	exigua_EL1	exigua_egg	2573.08	3.80577	1288.44	9.37271	0.460657	20.3464	4.99397e-92	3.09731e-90
1	maker-tulip_contig_340_pilon_pilon-augustus-gene-0.8-mRNA-1	exigua_EL1	exigua_egg	563.847	3624.78	2094.32	-2.68433	0.132127	-20.3163	9.21862e-92	5.68755e-90
5	augustus_masked-tulip_contig_667_pilon_pilon-processed-gene-0.180-mRNA-1	exigua_EL1	exigua_egg	1103.39	108.354	605.87	3.34562	0.164886	20.2905	1.55888e-91	9.5676e-90
3	maker-tulip_contig_77_pilon_pilon-augustus-gene-1.64-mRNA-1	exigua_EL1	exigua_egg	2659.61	3.93954	1331.78	9.41762	0.464549	20.2726	2.24363e-91	1.36989e-89
1	maker-tulip_contig_515_pilon_pilon-augustus-gene-1.59-mRNA-1	exigua_EL1	exigua_egg	573.11	4267.79	2420.45	-2.89669	0.143081	-20.2451	3.92776e-91	2.38581e-89
1	maker-tulip_contig_800_pilon_pilon-augustus-gene-1.64-mRNA-1	exigua_EL1	exigua_egg	1663.06	7973.96	4818.51	-2.26144	0.111717	-20.2426	4.13147e-91	2.49668e-89
3	maker-tulip_contig_42_pilon_pilon-augustus-gene-0.2-mRNA-1	exigua_EL1	exigua_egg	2476.82	37.6403	1257.23	6.05306	0.299215	20.2298	5.34924e-91	3.21609e-89
1	maker-tulip_contig_106_pilon_pilon-augustus-gene-0.22-mRNA-1	exigua_EL1	exigua_egg	1477.42	169.769	823.592	3.12202	0.154418	20.218	6.79166e-91	4.06259e-89
1	maker-tulip_contig_327_pilon_pilon-augustus-gene-9.20-mRNA-1	exigua_EL1	exigua_egg	446.904	2569.47	1508.19	-2.52312	0.12489	-20.2028	9.2543e-91	5.50771e-89
5	maker-tulip_contig_161_pilon_pilon-augustus-gene-0.33-mRNA-1	exigua_EL1	exigua_egg	1561.28	94.5904	827.934	4.04621	0.200419	20.1887	1.22952e-90	7.28072e-89
3	maker-tulip_contig_441_pilon_pilon-augustus-gene-4.59-mRNA-1	exigua_EL1	exigua_egg	3978.16	101.94	2040.05	5.28203	0.261862	20.171	1.75906e-90	1.03644e-88
1	augustus_masked-tulip_contig_287_pilon_pilon-processed-gene-1.153-mRNA-1	exigua_EL1	exigua_egg	2047.75	312.402	1180.08	2.712	0.13447	20.168	1.86964e-90	1.09611e-88
3	maker-tulip_contig_837_pilon_pilon-augustus-gene-9.66-mRNA-1	exigua_EL1	exigua_egg	895.488	12.9408	454.215	6.1322	0.304096	20.1653	1.97471e-90	1.15198e-88
-	maker-tulip_contig_81_pilon_pilon-augustus-gene-2.0-mRNA-1	exigua_EL1	exigua_egg	394.245	2653.69	1523.97	-2.75071	0.136441	-20.1605	2.175e-90	1.26257e-88
1	maker-tulip_contig_52_pilon_pilon-augustus-gene-2.0-mRNA-1	exigua_EL1	exigua_egg	284.562	1913.99	1099.27	-2.74973	0.136913	-20.0839	1.02121e-89	5.89901e-88
3	maker-tulip_contig_407_pilon_pilon-augustus-gene-7.99-mRNA-1	exigua_EL1	exigua_egg	1870.67	4.9801	937.824	8.56246	0.426498	20.0762	1.19151e-89	6.84917e-88
1	maker-tulip_contig_553_pilon_pilon-augustus-gene-0.91-mRNA-1	exigua_EL1	exigua_egg	555.054	2747.68	1651.37	-2.30743	0.114992	-20.066	1.4625e-89	8.36609e-88
1	maker-tulip_contig_362_pilon_pilon-augustus-gene-1.40-mRNA-1	exigua_EL1	exigua_egg	23.1456	702.689	362.917	-4.92481	0.245506	-20.0598	1.65725e-89	9.43432e-88
3	maker-tulip_contig_326_pilon_pilon-augustus-gene-0.0-mRNA-1	exigua_EL1	exigua_egg	2609.17	345.917	1477.54	2.91511	0.145435	20.0441	2.27067e-89	1.28642e-87
1	maker-tulip_contig_168_pilon_pilon-augustus-gene-0.43-mRNA-1	exigua_EL1	exigua_egg	241.324	1696.43	968.875	-2.81289	0.140568	-20.0108	4.4325e-89	2.49916e-87
1	maker-tulip_contig_407_pilon_pilon-augustus-gene-3.14-mRNA-1	exigua_EL1	exigua_egg	148.636	1562.85	855.741	-3.39453	0.16989	-19.9807	8.10477e-89	4.54793e-87
3	augustus_masked-tulip_contig_818_pilon_pilon-processed-gene-0.11-mRNA-1	exigua_EL1	exigua_egg	5846.37	387.692	3117.03	3.91565	0.196143	19.9632	1.15052e-88	6.42546e-87
1	maker-tulip_contig_33_pilon_pilon-augustus-gene-4.11-mRNA-1	exigua_EL1	exigua_egg	179.654	3361.52	1770.59	-4.22545	0.212582	-19.8768	6.46212e-88	3.59196e-86
1	augustus_masked-tulip_contig_537_pilon_pilon-processed-gene-1.34-mRNA-1	exigua_EL1	exigua_egg	480.419	4040.09	2260.25	-3.07195	0.154649	-19.864	8.34299e-88	4.61567e-86
1	maker-tulip_contig_515_pilon_pilon-augustus-gene-4.0-mRNA-1	exigua_EL1	exigua_egg	748.571	4901.9	2825.24	-2.71094	0.136695	-19.832	1.57491e-87	8.67229e-86
3	maker-tulip_contig_175_pilon_pilon-augustus-gene-0.11-mRNA-1	exigua_EL1	exigua_egg	867.845	48.2725	458.059	4.16626	0.210292	19.8118	2.35561e-87	1.29109e-85
3	maker-tulip_contig_194_pilon_pilon-augustus-gene-1.13-mRNA-1	exigua_EL1	exigua_egg	1019.04	33.351	526.194	4.92042	0.248396	19.8087	2.50281e-87	1.36542e-85
1	maker-tulip_contig_39_pilon_pilon-augustus-gene-0.33-mRNA-1	exigua_EL1	exigua_egg	170.407	1149.75	660.08	-2.75409	0.139195	-19.7858	3.94821e-87	2.14404e-85
1	maker-tulip_contig_1_pilon_pilon-augustus-gene-5.35-mRNA-1	exigua_EL1	exigua_egg	774.232	54.5742	414.403	3.82386	0.193355	19.7764	4.75429e-87	2.56993e-85
8	maker-tulip_contig_356_pilon_pilon-augustus-gene-1.17-mRNA-1	exigua_EL1	exigua_egg	8.18685	831.413	419.8	-6.66146	0.337146	-19.7584	6.79506e-87	3.6563e-85
5	maker-tulip_contig_746_pilon_pilon-augustus-gene-0.0-mRNA-1	exigua_EL1	exigua_egg	679.789	34.4248	357.107	4.29849	0.217601	19.754	7.41409e-87	3.97126e-85
5	maker-tulip_contig_468_pilon_pilon-augustus-gene-2.12-mRNA-1	exigua_EL1	exigua_egg	2253.17	28.6643	1140.92	6.30492	0.319334	19.744	9.03484e-87	4.81749e-85
3	maker-tulip_contig_468_pilon_pilon-augustus-gene-2.17-mRNA-1	exigua_EL1	exigua_egg	5450.48	542.845	2996.66	3.32745	0.168677	19.7268	1.26952e-86	6.73877e-85
1	maker-tulip_contig_44_pilon_pilon-augustus-gene-3.12-mRNA-1	exigua_EL1	exigua_egg	586.22	4506.06	2546.14	-2.94214	0.149427	-19.6896	2.64986e-86	1.40027e-84
5	maker-tulip_contig_15_pilon_pilon-augustus-gene-3.61-mRNA-1	exigua_EL1	exigua_egg	1077.08	9.38856	543.233	6.82387	0.346642	19.6857	2.86157e-86	1.50539e-84
1	maker-tulip_contig_230_pilon_pilon-augustus-gene-0.28-mRNA-1	exigua_EL1	exigua_egg	264.034	2213.47	1238.75	-3.06701	0.155824	-19.6825	3.04333e-86	1.59389e-84
5	maker-tulip_contig_159_pilon_pilon-augustus-gene-1.14-mRNA-1	exigua_EL1	exigua_egg	2332.44	249.412	1290.93	3.22603	0.164261	19.6396	7.09284e-86	3.69832e-84
5	maker-tulip_contig_323_pilon_pilon-augustus-gene-6.29-mRNA-1	exigua_EL1	exigua_egg	3771.2	244.901	2008.05	3.94698	0.201031	19.6337	7.96893e-86	4.13682e-84
8	maker-tulip_contig_333_pilon_pilon-augustus-gene-3.126-mRNA-1	exigua_EL1	exigua_egg	10.9323	701.01	355.971	-5.99996	0.306202	-19.5948	1.71256e-85	8.85122e-84
3	maker-tulip_contig_73_pilon_pilon-augustus-gene-0.80-mRNA-1	exigua_EL1	exigua_egg	758.934	18.9457	388.94	5.31715	0.271748	19.5665	2.98577e-85	1.53643e-83
8	maker-tulip_contig_88_pilon_pilon-augustus-gene-0.57-mRNA-1	exigua_EL1	exigua_egg	17.8879	691.329	354.608	-5.26872	0.269812	-19.5274	6.42395e-85	3.28983e-83
5	maker-tulip_contig_58_pilon_pilon-augustus-gene-5.4-mRNA-1	exigua_EL1	exigua_egg	1049.94	7.31321	528.628	7.14786	0.366046	19.5272	6.449e-85	3.28983e-83
1	maker-tulip_contig_280_pilon_pilon-augustus-gene-1.74-mRNA-1	exigua_EL1	exigua_egg	804.648	11.2063	407.927	6.15588	0.315679	19.5004	1.08899e-84	5.5313e-83
1	maker-tulip_contig_523_pilon_pilon-augustus-gene-0.51-mRNA-1	exigua_EL1	exigua_egg	149.042	2338.82	1243.93	-3.97287	0.203785	-19.4954	1.20197e-84	6.07898e-83
1	maker-tulip_contig_33_pilon_pilon-augustus-gene-5.2-mRNA-1	exigua_EL1	exigua_egg	8726.4	427.46	4576.93	4.3525	0.223317	19.4903	1.3274e-84	6.68463e-83
1	augustus_masked-tulip_contig_102_pilon_pilon-processed-gene-0.21-mRNA-1	exigua_EL1	exigua_egg	147.705	1358.03	752.869	-3.20082	0.164379	-19.4722	1.89108e-84	9.48274e-83
5	maker-tulip_contig_603_pilon_pilon-augustus-gene-3.69-mRNA-1	exigua_EL1	exigua_egg	14145.2	1.67806	7073.44	12.9695	0.666063	19.4719	1.9003e-84	9.4886e-83
1	maker-tulip_contig_31_pilon_pilon-augustus-gene-1.70-mRNA-1	exigua_EL1	exigua_egg	1660.88	57.8306	859.356	4.85236	0.249214	19.4707	1.94586e-84	9.6751e-83
8	maker-tulip_contig_661_pilon_pilon-augustus-gene-0.33-mRNA-1	exigua_EL1	exigua_egg	11.8298	663.736	337.783	-5.80601	0.29896	-19.4207	5.15889e-84	2.5543e-82
1	augustus_masked-tulip_contig_77_pilon_pilon-processed-gene-1.5-mRNA-1	exigua_EL1	exigua_egg	1035.19	131.814	583.501	2.97507	0.153247	19.4136	5.92754e-84	2.9226e-82
12	augustus_masked-tulip_contig_281_pilon_pilon-processed-gene-1.55-mRNA-1	exigua_EL1	exigua_egg	1.82146	6564.25	3283.04	-11.8119	0.608633	-19.4072	6.70927e-84	3.29425e-82
8	maker-tulip_contig_1_pilon_pilon-augustus-gene-5.30-mRNA-1	exigua_EL1	exigua_egg	36.9852	972.967	504.976	-4.71483	0.243388	-19.3716	1.33915e-83	6.54793e-82
3	maker-tulip_contig_531_pilon_pilon-augustus-gene-3.29-mRNA-1	exigua_EL1	exigua_egg	3841.56	2.68955	1922.13	10.4123	0.538061	19.3515	1.98057e-83	9.64421e-82
1	maker-tulip_contig_516_pilon_pilon-augustus-gene-2.31-mRNA-1	exigua_EL1	exigua_egg	775.901	34.0682	404.985	4.50472	0.233397	19.3007	5.29733e-83	2.56888e-81
5	augustus_masked-tulip_contig_827_pilon_pilon-processed-gene-0.9-mRNA-1	exigua_EL1	exigua_egg	1024.58	39.2017	531.889	4.70128	0.243687	19.2923	6.23279e-83	3.01013e-81
1	maker-tulip_contig_168_pilon_pilon-augustus-gene-1.26-mRNA-1	exigua_EL1	exigua_egg	445.818	3650.04	2047.93	-3.03338	0.157642	-19.2421	1.64259e-82	7.90054e-81
11	maker-tulip_contig_855_pilon_pilon-augustus-gene-3.41-mRNA-1	exigua_EL1	exigua_egg	2.78447	7648.5	3825.64	-11.4423	0.595294	-19.2212	2.45972e-82	1.17826e-80
1	maker-tulip_contig_20_pilon_pilon-augustus-gene-0.28-mRNA-1	exigua_EL1	exigua_egg	866.667	74.5165	470.592	3.54286	0.184364	19.2167	2.68283e-82	1.27994e-80
1	maker-tulip_contig_199_pilon_pilon-augustus-gene-1.34-mRNA-1	exigua_EL1	exigua_egg	512.972	2852.6	1682.79	-2.47508	0.128801	-19.2163	2.70259e-82	1.28417e-80
4	augustus_masked-tulip_contig_666_pilon_pilon-processed-gene-2.66-mRNA-1	exigua_EL1	exigua_egg	2171.3	5.21284	1088.26	8.7655	0.456206	19.2139	2.83154e-82	1.34003e-80
1	maker-tulip_contig_870_pilon_pilon-augustus-gene-4.109-mRNA-1	exigua_EL1	exigua_egg	163.81	1513.04	838.423	-3.20784	0.167098	-19.1974	3.89068e-82	1.83391e-80
1	maker-tulip_contig_252_pilon_pilon-augustus-gene-1.13-mRNA-1	exigua_EL1	exigua_egg	1705.68	158.946	932.313	3.42535	0.178465	19.1934	4.19912e-82	1.97141e-80
1	maker-tulip_contig_396_pilon_pilon-augustus-gene-0.49-mRNA-1	exigua_EL1	exigua_egg	517.083	2942.24	1729.66	-2.50846	0.130822	-19.1746	6.03504e-82	2.8221e-80
1	maker-tulip_contig_454_pilon_pilon-augustus-gene-0.21-mRNA-1	exigua_EL1	exigua_egg	3345.74	14496.7	8921.21	-2.11527	0.110384	-19.1628	7.57185e-82	3.52674e-80
1	augustus_masked-tulip_contig_343_pilon_pilon-processed-gene-0.89-mRNA-1	exigua_EL1	exigua_egg	1236.84	205.947	721.395	2.58638	0.134984	19.1606	7.89108e-82	3.66097e-80
8	maker-tulip_contig_43_pilon_pilon-augustus-gene-6.50-mRNA-1	exigua_EL1	exigua_egg	58.4581	2563.74	1311.1	-5.45501	0.284754	-19.1569	8.47877e-82	3.91819e-80
1	maker-tulip_contig_451_pilon_pilon-augustus-gene-1.30-mRNA-1	exigua_EL1	exigua_egg	12.4856	548.38	280.433	-5.45773	0.285487	-19.1172	1.81483e-81	8.35388e-80
1	maker-tulip_contig_361_pilon_pilon-augustus-gene-1.66-mRNA-1	exigua_EL1	exigua_egg	501.13	4406.79	2453.96	-3.13664	0.164305	-19.0904	3.03689e-81	1.39248e-79
3	maker-tulip_contig_666_pilon_pilon-augustus-gene-2.19-mRNA-1	exigua_EL1	exigua_egg	1301.26	37.4114	669.334	5.11949	0.269009	19.0309	9.45837e-81	4.32006e-79
1	maker-tulip_contig_505_pilon_pilon-augustus-gene-3.73-mRNA-1	exigua_EL1	exigua_egg	599.323	2649.9	1624.61	-2.14439	0.112719	-19.0243	1.07269e-80	4.88053e-79
3	maker-tulip_contig_77_pilon_pilon-augustus-gene-0.108-mRNA-1	exigua_EL1	exigua_egg	2056.53	31.482	1044	6.03637	0.317783	18.9952	1.86808e-80	8.46673e-79
-	maker-tulip_contig_22_pilon_pilon-augustus-gene-0.4-mRNA-1	exigua_EL1	exigua_egg	23.0776	584.781	303.93	-4.66104	0.245603	-18.9779	2.59664e-80	1.17237e-78
3	maker-tulip_contig_601_pilon_pilon-augustus-gene-0.2-mRNA-1	exigua_EL1	exigua_egg	673.643	16.8531	345.248	5.31436	0.280506	18.9456	4.80057e-80	2.15916e-78
5	maker-tulip_contig_934_pilon_pilon-augustus-gene-2.8-mRNA-1	exigua_EL1	exigua_egg	1196.83	6.97822	601.906	7.46856	0.394491	18.9321	6.20098e-80	2.77842e-78
3	maker-tulip_contig_380_pilon_pilon-augustus-gene-0.22-mRNA-1	exigua_EL1	exigua_egg	899.743	16.3219	458.032	5.7685	0.3048	18.9255	7.03313e-80	3.13933e-78
1	maker-tulip_contig_625_pilon_pilon-augustus-gene-0.41-mRNA-1	exigua_EL1	exigua_egg	154.639	1052.27	603.454	-2.76682	0.146377	-18.902	1.09784e-79	4.88185e-78
1	maker-tulip_contig_895_pilon_pilon-augustus-gene-2.47-mRNA-1	exigua_EL1	exigua_egg	651.28	6001.66	3326.47	-3.20375	0.169985	-18.8473	3.09511e-79	1.37116e-77
1	maker-tulip_contig_31_pilon_pilon-augustus-gene-1.93-mRNA-1	exigua_EL1	exigua_egg	179.311	1312.05	745.682	-2.87092	0.152409	-18.8369	3.76322e-79	1.66089e-77
1	augustus_masked-tulip_contig_281_pilon_pilon-processed-gene-1.68-mRNA-1	exigua_EL1	exigua_egg	254.112	1629.93	942.021	-2.68101	0.142359	-18.8327	4.07413e-79	1.7914e-77
3	maker-tulip_contig_623_pilon_pilon-augustus-gene-1.7-mRNA-1	exigua_EL1	exigua_egg	1041.6	101.894	571.746	3.35838	0.178858	18.7769	1.16772e-78	5.1154e-77
1	maker-tulip_contig_868_pilon_pilon-augustus-gene-0.59-mRNA-1	exigua_EL1	exigua_egg	22.7101	813.227	417.968	-5.15793	0.274915	-18.7619	1.54755e-78	6.75421e-77
1	maker-tulip_contig_507_pilon_pilon-augustus-gene-0.86-mRNA-1	exigua_EL1	exigua_egg	264.503	1708.98	986.739	-2.69141	0.143956	-18.696	5.33204e-78	2.31855e-76
1	maker-tulip_contig_187_pilon_pilon-augustus-gene-2.21-mRNA-1	exigua_EL1	exigua_egg	288.579	1764.85	1026.71	-2.61282	0.139755	-18.6958	5.35706e-78	2.32087e-76
1	maker-tulip_contig_109_pilon_pilon-augustus-gene-0.8-mRNA-1	exigua_EL1	exigua_egg	198.617	1290.67	744.643	-2.69999	0.144469	-18.689	6.08137e-78	2.62501e-76
-	augustus_masked-tulip_contig_15_pilon_pilon-processed-gene-2.8-mRNA-1	exigua_EL1	exigua_egg	619.562	26.4278	322.995	4.54872	0.243461	18.6835	6.74348e-78	2.90019e-76
1	maker-tulip_contig_774_pilon_pilon-augustus-gene-0.128-mRNA-1	exigua_EL1	exigua_egg	755.459	3912.19	2333.83	-2.37247	0.126987	-18.6828	6.83885e-78	2.93051e-76
8	maker-tulip_contig_175_pilon_pilon-augustus-gene-4.54-mRNA-1	exigua_EL1	exigua_egg	88.6944	1864.22	976.459	-4.39389	0.235343	-18.6701	8.66248e-78	3.6985e-76
11	maker-tulip_contig_121_pilon_pilon-augustus-gene-4.0-mRNA-1	exigua_EL1	exigua_egg	2787	24894.8	13840.9	-3.15901	0.16951	-18.6361	1.63686e-77	6.96344e-76
1	maker-tulip_contig_290_pilon_pilon-augustus-gene-5.23-mRNA-1	exigua_EL1	exigua_egg	211.828	1331.1	771.463	-2.65179	0.142747	-18.5768	4.94912e-77	2.09786e-75
3	maker-tulip_contig_360_pilon_pilon-augustus-gene-2.18-mRNA-1	exigua_EL1	exigua_egg	33704.9	6182.45	19943.7	2.44682	0.131928	18.5467	8.67235e-77	3.6629e-75
1	augustus_masked-tulip_contig_420_pilon_pilon-processed-gene-1.8-mRNA-1	exigua_EL1	exigua_egg	64.0406	745.492	404.766	-3.54208	0.191149	-18.5305	1.17198e-76	4.93237e-75
5	maker-tulip_contig_738_pilon_pilon-augustus-gene-1.19-mRNA-1	exigua_EL1	exigua_egg	3776.1	2.65878	1889.38	10.5716	0.571052	18.5126	1.63484e-76	6.85586e-75
1	augustus_masked-tulip_contig_1_pilon_pilon-processed-gene-1.5-mRNA-1	exigua_EL1	exigua_egg	208.8	2151.31	1180.06	-3.36445	0.18176	-18.5104	1.70075e-76	7.10697e-75
7	maker-tulip_contig_547_pilon_pilon-augustus-gene-6.77-mRNA-1	exigua_EL1	exigua_egg	281.691	5681.71	2981.7	-4.33376	0.234167	-18.5072	1.80785e-76	7.52779e-75
1	maker-tulip_contig_217_pilon_pilon-augustus-gene-3.19-mRNA-1	exigua_EL1	exigua_egg	196.251	1256.81	726.531	-2.67862	0.144759	-18.504	1.91532e-76	7.94723e-75
3	maker-tulip_contig_424_pilon_pilon-augustus-gene-2.40-mRNA-1	exigua_EL1	exigua_egg	1814.22	4.70508	909.465	8.62059	0.466297	18.4873	2.61078e-76	1.07949e-74
3	augustus_masked-tulip_contig_390_pilon_pilon-processed-gene-0.26-mRNA-1	exigua_EL1	exigua_egg	12021.2	2045.99	7033.62	2.55504	0.138213	18.4863	2.66349e-76	1.09743e-74
1	maker-tulip_contig_33_pilon_pilon-augustus-gene-0.75-mRNA-1	exigua_EL1	exigua_egg	1423.19	6343	3883.09	-2.15593	0.116793	-18.4593	4.38606e-76	1.80088e-74
1	maker-tulip_contig_407_pilon_pilon-augustus-gene-7.45-mRNA-1	exigua_EL1	exigua_egg	19.2107	602.75	310.981	-4.97285	0.26965	-18.4419	6.06291e-76	2.48074e-74
1	augustus_masked-tulip_contig_522_pilon_pilon-processed-gene-0.4-mRNA-1	exigua_EL1	exigua_egg	509.425	2410.51	1459.97	-2.2427	0.121697	-18.4286	7.75312e-76	3.16134e-74
1	maker-tulip_contig_33_pilon_pilon-augustus-gene-3.53-mRNA-1	exigua_EL1	exigua_egg	48.0167	968.702	508.359	-4.33325	0.235185	-18.4248	8.30387e-76	3.37423e-74
3	maker-tulip_contig_274_pilon_pilon-augustus-gene-2.27-mRNA-1	exigua_EL1	exigua_egg	1073.24	38.8508	556.046	4.78181	0.259557	18.423	8.58987e-76	3.47846e-74
1	maker-tulip_contig_523_pilon_pilon-augustus-gene-0.127-mRNA-1	exigua_EL1	exigua_egg	81.1328	748.921	415.027	-3.20549	0.173999	-18.4224	8.67903e-76	3.49167e-74
1	maker-tulip_contig_260_pilon_pilon-augustus-gene-0.30-mRNA-1	exigua_EL1	exigua_egg	1061.87	55.4757	558.674	4.26647	0.231592	18.4224	8.69203e-76	3.49167e-74
-	maker-tulip_contig_530_pilon_pilon-augustus-gene-0.15-mRNA-1	exigua_EL1	exigua_egg	1019.3	5.37739	512.337	7.58575	0.411771	18.4222	8.71139e-76	3.49167e-74
1	maker-tulip_contig_550_pilon_pilon-augustus-gene-0.1-mRNA-1	exigua_EL1	exigua_egg	85.8497	1094.78	590.315	-3.67323	0.199674	-18.3961	1.41222e-75	5.64123e-74
1	maker-tulip_contig_666_pilon_pilon-augustus-gene-0.1-mRNA-1	exigua_EL1	exigua_egg	765.148	7.55746	386.353	6.68501	0.363447	18.3933	1.48566e-75	5.91454e-74
1	maker-tulip_contig_59_pilon_pilon-augustus-gene-0.39-mRNA-1	exigua_EL1	exigua_egg	200.103	1732.07	966.085	-3.11299	0.169378	-18.3789	1.93915e-75	7.69393e-74
-	maker-tulip_contig_248_pilon_pilon-augustus-gene-0.32-mRNA-1	exigua_EL1	exigua_egg	1011.23	28.4292	519.832	5.13885	0.27984	18.3635	2.57375e-75	1.01775e-73
1	maker-tulip_contig_843_pilon_pilon-augustus-gene-5.8-mRNA-1	exigua_EL1	exigua_egg	911.939	4529.86	2720.9	-2.31234	0.125959	-18.3579	2.85373e-75	1.12469e-73
1	maker-tulip_contig_380_pilon_pilon-augustus-gene-0.43-mRNA-1	exigua_EL1	exigua_egg	266.102	1346.57	806.335	-2.33927	0.127538	-18.3417	3.84723e-75	1.51119e-73
3	maker-tulip_contig_287_pilon_pilon-augustus-gene-1.0-mRNA-1	exigua_EL1	exigua_egg	4621.81	2.19172	2312	11.0892	0.604851	18.3338	4.44371e-75	1.73969e-73
3	augustus_masked-tulip_contig_931_pilon_pilon-processed-gene-1.9-mRNA-1	exigua_EL1	exigua_egg	721.884	9.3129	365.599	6.2485	0.340919	18.3284	4.9085e-75	1.90989e-73
-	maker-tulip_contig_841_pilon_pilon-augustus-gene-0.69-mRNA-1	exigua_EL1	exigua_egg	82.3067	861.497	471.902	-3.38834	0.184868	-18.3284	4.91087e-75	1.90989e-73
11	augustus_masked-tulip_contig_702_pilon_pilon-processed-gene-0.26-mRNA-1	exigua_EL1	exigua_egg	9.45587	1134.36	571.907	-6.90816	0.377623	-18.2938	9.27308e-75	3.59454e-73
1	maker-tulip_contig_711_pilon_pilon-augustus-gene-1.26-mRNA-1	exigua_EL1	exigua_egg	1290.76	112.377	701.568	3.52327	0.192625	18.2908	9.79017e-75	3.78254e-73
1	maker-tulip_contig_216_pilon_pilon-augustus-gene-0.56-mRNA-1	exigua_EL1	exigua_egg	5013.3	124.846	2569.07	5.32611	0.291329	18.2821	1.14885e-74	4.42418e-73
1	maker-tulip_contig_149_pilon_pilon-augustus-gene-0.4-mRNA-1	exigua_EL1	exigua_egg	153.831	1129.71	641.768	-2.87615	0.15733	-18.281	1.17191e-74	4.4983e-73
6	augustus_masked-tulip_contig_430_pilon_pilon-processed-gene-0.20-mRNA-1	exigua_EL1	exigua_egg	1911.89	6.58839	959.241	8.16179	0.447019	18.2583	1.77842e-74	6.80419e-73
1	maker-tulip_contig_58_pilon_pilon-augustus-gene-1.34-mRNA-1	exigua_EL1	exigua_egg	216.808	2346.56	1281.68	-3.43608	0.188205	-18.2571	1.81642e-74	6.92708e-73
1	maker-tulip_contig_407_pilon_pilon-augustus-gene-1.73-mRNA-1	exigua_EL1	exigua_egg	443.234	2915.87	1679.55	-2.71794	0.14888	-18.256	1.85519e-74	7.05212e-73
1	maker-tulip_contig_29_pilon_pilon-augustus-gene-1.30-mRNA-1	exigua_EL1	exigua_egg	28.8196	1058.44	543.629	-5.19711	0.2848	-18.2483	2.13475e-74	8.0628e-73
1	maker-tulip_contig_429_pilon_pilon-augustus-gene-2.0-mRNA-1	exigua_EL1	exigua_egg	254.479	1511.93	883.206	-2.57087	0.140953	-18.2392	2.52086e-74	9.49068e-73
8	maker-tulip_contig_384_pilon_pilon-augustus-gene-0.3-mRNA-1	exigua_EL1	exigua_egg	15.4095	668.278	341.844	-5.43205	0.298434	-18.2018	4.991e-74	1.87306e-72
1	maker-tulip_contig_508_pilon_pilon-augustus-gene-1.10-mRNA-1	exigua_EL1	exigua_egg	248.468	1277.76	763.114	-2.36265	0.129974	-18.1778	7.73679e-74	2.88514e-72
3	maker-tulip_contig_674_pilon_pilon-augustus-gene-5.23-mRNA-1	exigua_EL1	exigua_egg	694.019	13.7969	353.908	5.62789	0.309697	18.1723	8.55779e-74	3.18123e-72
1	maker-tulip_contig_807_pilon_pilon-augustus-gene-3.80-mRNA-1	exigua_EL1	exigua_egg	123.879	1237.42	680.651	-3.32146	0.183075	-18.1426	1.46921e-73	5.44438e-72
6	maker-tulip_contig_58_pilon_pilon-augustus-gene-0.15-mRNA-1	exigua_EL1	exigua_egg	2562.6	2.79427	1282.7	9.82565	0.541712	18.1381	1.59336e-73	5.88595e-72
3	maker-tulip_contig_781_pilon_pilon-augustus-gene-5.28-mRNA-1	exigua_EL1	exigua_egg	679.541	16.5703	348.055	5.37735	0.296858	18.1142	2.46045e-73	9.06059e-72
1	maker-tulip_contig_538_pilon_pilon-augustus-gene-0.52-mRNA-1	exigua_EL1	exigua_egg	720.897	15.6479	368.272	5.53245	0.305539	18.1072	2.79593e-73	1.02639e-71
1	maker-tulip_contig_731_pilon_pilon-augustus-gene-0.27-mRNA-1	exigua_EL1	exigua_egg	924.273	4322.81	2623.54	-2.22541	0.122931	-18.103	3.01973e-73	1.10511e-71
3	augustus_masked-tulip_contig_47_pilon_pilon-processed-gene-0.4-mRNA-1	exigua_EL1	exigua_egg	1835.76	3.58886	919.673	9.01942	0.498382	18.0974	3.3407e-73	1.21879e-71
1	maker-tulip_contig_244_pilon_pilon-augustus-gene-0.33-mRNA-1	exigua_EL1	exigua_egg	604.141	28.0941	316.118	4.42145	0.244425	18.0891	3.88103e-73	1.41155e-71
1	augustus_masked-tulip_contig_716_pilon_pilon-processed-gene-1.20-mRNA-1	exigua_EL1	exigua_egg	76.2744	789.842	433.058	-3.37394	0.186564	-18.0846	4.21109e-73	1.52688e-71
1	maker-tulip_contig_448_pilon_pilon-augustus-gene-2.21-mRNA-1	exigua_EL1	exigua_egg	11293.8	1291.13	6292.48	3.12902	0.173076	18.0789	4.67211e-73	1.68884e-71
1	augustus_masked-tulip_contig_809_pilon_pilon-processed-gene-1.3-mRNA-1	exigua_EL1	exigua_egg	269.688	2512.78	1391.23	-3.22036	0.17834	-18.0574	6.89943e-73	2.48633e-71
8	maker-tulip_contig_199_pilon_pilon-augustus-gene-0.32-mRNA-1	exigua_EL1	exigua_egg	7.27638	1741.66	874.466	-7.89981	0.437599	-18.0526	7.52077e-73	2.70197e-71
8	augustus_masked-tulip_contig_714_pilon_pilon-processed-gene-0.82-mRNA-1	exigua_EL1	exigua_egg	8.15731	928.269	468.213	-6.82243	0.378017	-18.0479	8.18958e-73	2.93331e-71
1	maker-tulip_contig_731_pilon_pilon-augustus-gene-0.18-mRNA-1	exigua_EL1	exigua_egg	122.385	1265.5	693.944	-3.36933	0.186967	-18.021	1.33305e-72	4.76021e-71
3	augustus_masked-tulip_contig_407_pilon_pilon-processed-gene-6.0-mRNA-1	exigua_EL1	exigua_egg	577.416	9.79161	293.604	5.86976	0.325979	18.0065	1.73091e-72	6.16223e-71
1	augustus_masked-tulip_contig_343_pilon_pilon-processed-gene-0.84-mRNA-1	exigua_EL1	exigua_egg	54.7491	754.459	404.604	-3.78408	0.210359	-17.9886	2.3916e-72	8.48873e-71
1	maker-tulip_contig_835_pilon_pilon-augustus-gene-0.2-mRNA-1	exigua_EL1	exigua_egg	53.7464	785.689	419.718	-3.86886	0.215222	-17.9761	2.99873e-72	1.06117e-70
1	maker-tulip_contig_181_pilon_pilon-augustus-gene-1.9-mRNA-1	exigua_EL1	exigua_egg	154.418	1852.45	1003.43	-3.58485	0.199795	-17.9426	5.48136e-72	1.9339e-70
1	maker-tulip_contig_91_pilon_pilon-augustus-gene-0.16-mRNA-1	exigua_EL1	exigua_egg	1000.98	4821.33	2911.15	-2.26784	0.126445	-17.9353	6.25e-72	2.19851e-70
1	augustus_masked-tulip_contig_208_pilon_pilon-processed-gene-1.39-mRNA-1	exigua_EL1	exigua_egg	707.253	7.80933	357.531	6.507	0.363174	17.917	8.68127e-72	3.04465e-70
1	maker-tulip_contig_870_pilon_pilon-augustus-gene-4.31-mRNA-1	exigua_EL1	exigua_egg	2846.86	376.224	1611.54	2.91856	0.162895	17.9169	8.70764e-72	3.04483e-70
1	augustus_masked-tulip_contig_234_pilon_pilon-processed-gene-2.38-mRNA-1	exigua_EL1	exigua_egg	1457.76	7905.94	4681.85	-2.43907	0.136309	-17.8937	1.32064e-71	4.60427e-70
3	augustus_masked-tulip_contig_916_pilon_pilon-processed-gene-3.6-mRNA-1	exigua_EL1	exigua_egg	2141.25	2.95136	1072.1	9.56254	0.534649	17.8856	1.52583e-71	5.30395e-70
3	maker-tulip_contig_236_pilon_pilon-augustus-gene-3.8-mRNA-1	exigua_EL1	exigua_egg	1480.5	152.11	816.304	3.28331	0.183757	17.8677	2.10352e-71	7.29056e-70
3	maker-tulip_contig_620_pilon_pilon-augustus-gene-0.59-mRNA-1	exigua_EL1	exigua_egg	1469.82	3.54815	736.686	8.70035	0.487006	17.865	2.2102e-71	7.63782e-70
1	augustus_masked-tulip_contig_586_pilon_pilon-processed-gene-2.32-mRNA-1	exigua_EL1	exigua_egg	67.9428	999.831	533.887	-3.8794	0.217166	-17.8637	2.25937e-71	7.78493e-70
1	maker-tulip_contig_506_pilon_pilon-augustus-gene-1.106-mRNA-1	exigua_EL1	exigua_egg	1557.2	6476.77	4016.98	-2.0563	0.115276	-17.8381	3.57811e-71	1.22929e-69
1	maker-tulip_contig_362_pilon_pilon-augustus-gene-6.3-mRNA-1	exigua_EL1	exigua_egg	1434.36	169.782	802.07	3.07606	0.172607	17.8212	4.84013e-71	1.65697e-69
1	maker-tulip_contig_290_pilon_pilon-augustus-gene-5.45-mRNA-1	exigua_EL1	exigua_egg	225.335	2803.46	1514.39	-3.63636	0.204048	-17.8211	4.85112e-71	1.65697e-69
5	maker-tulip_contig_407_pilon_pilon-augustus-gene-2.18-mRNA-1	exigua_EL1	exigua_egg	615.584	17.5761	316.58	5.14526	0.288819	17.8148	5.42158e-71	1.84647e-69
5	maker-tulip_contig_854_pilon_pilon-augustus-gene-2.30-mRNA-1	exigua_EL1	exigua_egg	875.079	30.4797	452.78	4.83736	0.271795	17.7978	7.34652e-71	2.49485e-69
1	maker-tulip_contig_327_pilon_pilon-augustus-gene-10.63-mRNA-1	exigua_EL1	exigua_egg	840.466	6.97418	423.72	6.89744	0.38808	17.7733	1.13867e-70	3.85576e-69
3	maker-tulip_contig_327_pilon_pilon-augustus-gene-10.71-mRNA-1	exigua_EL1	exigua_egg	1055.69	72.2542	563.972	3.86257	0.217362	17.7702	1.20217e-70	4.05913e-69
3	maker-tulip_contig_584_pilon_pilon-augustus-gene-3.18-mRNA-1	exigua_EL1	exigua_egg	607.491	9.27047	308.381	6.04526	0.340665	17.7455	1.86889e-70	6.29229e-69
3	maker-tulip_contig_125_pilon_pilon-augustus-gene-0.318-mRNA-1	exigua_EL1	exigua_egg	6009.83	1.8875	3005.86	11.73	0.661406	17.7349	2.25325e-70	7.56475e-69
1	maker-tulip_contig_126_pilon_pilon-augustus-gene-1.53-mRNA-1	exigua_EL1	exigua_egg	534.089	3202.78	1868.43	-2.58436	0.145856	-17.7186	3.01436e-70	1.00913e-68
1	maker-tulip_contig_192_pilon_pilon-augustus-gene-1.57-mRNA-1	exigua_EL1	exigua_egg	35.5885	489.16	262.374	-3.77995	0.213345	-17.7176	3.06814e-70	1.02422e-68
1	maker-tulip_contig_58_pilon_pilon-augustus-gene-1.26-mRNA-1	exigua_EL1	exigua_egg	1204.39	6017	3610.7	-2.3206	0.131065	-17.7058	3.78531e-70	1.26006e-68
1	maker-tulip_contig_837_pilon_pilon-augustus-gene-2.19-mRNA-1	exigua_EL1	exigua_egg	453.86	2435.01	1444.44	-2.4239	0.137204	-17.6664	7.60382e-70	2.52404e-68
1	maker-tulip_contig_318_pilon_pilon-augustus-gene-0.34-mRNA-1	exigua_EL1	exigua_egg	1315.75	252.451	784.099	2.3828	0.135038	17.6455	1.10287e-69	3.65063e-68
1	maker-tulip_contig_199_pilon_pilon-augustus-gene-4.60-mRNA-1	exigua_EL1	exigua_egg	416.273	3347.93	1882.1	-3.00741	0.170444	-17.6446	1.11915e-69	3.69414e-68
6	maker-tulip_contig_931_pilon_pilon-augustus-gene-1.36-mRNA-1	exigua_EL1	exigua_egg	1442.41	22.9511	732.682	5.9636	0.338018	17.6428	1.15538e-69	3.80307e-68
8	maker-tulip_contig_674_pilon_pilon-augustus-gene-2.12-mRNA-1	exigua_EL1	exigua_egg	19.004	925.448	472.226	-5.59937	0.317757	-17.6216	1.68267e-69	5.5233e-68
1	maker-tulip_contig_247_pilon_pilon-augustus-gene-2.23-mRNA-1	exigua_EL1	exigua_egg	459.916	2349.27	1404.59	-2.35266	0.133776	-17.5866	3.11878e-69	1.02088e-67
1	maker-tulip_contig_651_pilon_pilon-augustus-gene-0.43-mRNA-1	exigua_EL1	exigua_egg	296.086	1985.66	1140.88	-2.74549	0.15642	-17.552	5.73861e-69	1.87324e-67
1	maker-tulip_contig_59_pilon_pilon-augustus-gene-1.32-mRNA-1	exigua_EL1	exigua_egg	88.3743	1260.25	674.311	-3.83278	0.218616	-17.532	8.15747e-69	2.65546e-67
1	maker-tulip_contig_145_pilon_pilon-augustus-gene-2.70-mRNA-1	exigua_EL1	exigua_egg	17.3319	629.959	323.645	-5.18308	0.295639	-17.5318	8.19393e-69	2.65998e-67
5	maker-tulip_contig_783_pilon_pilon-augustus-gene-0.34-mRNA-1	exigua_EL1	exigua_egg	679.445	15.0585	347.252	5.48718	0.31301	17.5304	8.39925e-69	2.71914e-67
1	augustus_masked-tulip_contig_217_pilon_pilon-processed-gene-3.66-mRNA-1	exigua_EL1	exigua_egg	62.6174	652.188	357.403	-3.37934	0.192952	-17.5139	1.12184e-68	3.62184e-67
1	maker-tulip_contig_196_pilon_pilon-augustus-gene-1.52-mRNA-1	exigua_EL1	exigua_egg	1461.7	7919.35	4690.53	-2.4376	0.139342	-17.4936	1.60167e-68	5.15685e-67
1	maker-tulip_contig_70_pilon_pilon-augustus-gene-0.20-mRNA-1	exigua_EL1	exigua_egg	112.704	1125.1	618.904	-3.31896	0.189764	-17.4899	1.70946e-68	5.48889e-67
5	maker-tulip_contig_303_pilon_pilon-augustus-gene-2.19-mRNA-1	exigua_EL1	exigua_egg	586.002	7.86169	296.932	6.23438	0.356989	17.4638	2.70266e-68	8.65437e-67
1	maker-tulip_contig_690_pilon_pilon-augustus-gene-2.64-mRNA-1	exigua_EL1	exigua_egg	339.165	1631.37	985.27	-2.26638	0.129867	-17.4515	3.35203e-68	1.07047e-66
1	maker-tulip_contig_732_pilon_pilon-augustus-gene-0.5-mRNA-1	exigua_EL1	exigua_egg	514.193	2382.8	1448.5	-2.21238	0.126788	-17.4494	3.47771e-68	1.1076e-66
1	maker-tulip_contig_175_pilon_pilon-augustus-gene-2.5-mRNA-1	exigua_EL1	exigua_egg	392.853	1690.59	1041.72	-2.10558	0.120672	-17.4487	3.52073e-68	1.11828e-66
5	maker-tulip_contig_640_pilon_pilon-augustus-gene-2.44-mRNA-1	exigua_EL1	exigua_egg	1185.19	6.23599	595.714	7.61283	0.43665	17.4347	4.50305e-68	1.42645e-66
1	augustus_masked-tulip_contig_778_pilon_pilon-processed-gene-1.36-mRNA-1	exigua_EL1	exigua_egg	7.37151	557.142	282.257	-6.25056	0.359439	-17.3898	9.86049e-68	3.11517e-66
1	maker-tulip_contig_690_pilon_pilon-augustus-gene-2.62-mRNA-1	exigua_EL1	exigua_egg	299.629	1865.5	1082.56	-2.63811	0.151764	-17.383	1.11002e-67	3.49745e-66
3	maker-tulip_contig_2_pilon_pilon-augustus-gene-2.52-mRNA-1	exigua_EL1	exigua_egg	955.887	5.14883	480.518	7.58768	0.436506	17.3828	1.11437e-67	3.5018e-66
3	maker-tulip_contig_89_pilon_pilon-augustus-gene-0.40-mRNA-1	exigua_EL1	exigua_egg	1999.94	237.74	1118.84	3.07007	0.176751	17.3695	1.40474e-67	4.40252e-66
-	maker-tulip_contig_281_pilon_pilon-augustus-gene-5.37-mRNA-1	exigua_EL1	exigua_egg	602.064	32.7625	317.413	4.20663	0.242217	17.3672	1.46206e-67	4.57001e-66
1	maker-tulip_contig_274_pilon_pilon-augustus-gene-0.30-mRNA-1	exigua_EL1	exigua_egg	457.64	1874.69	1166.16	-2.03438	0.117181	-17.361	1.62921e-67	5.07901e-66
1	maker-tulip_contig_327_pilon_pilon-augustus-gene-2.25-mRNA-1	exigua_EL1	exigua_egg	638.886	3652.88	2145.88	-2.51532	0.144955	-17.3525	1.88981e-67	5.87587e-66
1	maker-tulip_contig_623_pilon_pilon-augustus-gene-4.83-mRNA-1	exigua_EL1	exigua_egg	90.3311	1125.73	608.029	-3.63882	0.209726	-17.3504	1.95962e-67	6.07689e-66
1	maker-tulip_contig_21_pilon_pilon-augustus-gene-0.13-mRNA-1	exigua_EL1	exigua_egg	584.194	37.2174	310.706	3.97532	0.229167	17.3468	2.08434e-67	6.44669e-66
-	maker-tulip_contig_781_pilon_pilon-augustus-gene-6.45-mRNA-1	exigua_EL1	exigua_egg	553.013	9.02032	281.016	5.91661	0.341282	17.3364	2.49727e-67	7.70364e-66
1	maker-tulip_contig_276_pilon_pilon-augustus-gene-1.3-mRNA-1	exigua_EL1	exigua_egg	1064.18	5113.76	3088.97	-2.2647	0.130679	-17.3302	2.7812e-67	8.55709e-66
3	maker-tulip_contig_406_pilon_pilon-augustus-gene-0.34-mRNA-1	exigua_EL1	exigua_egg	783.933	80.9028	432.418	3.274	0.189033	17.3197	3.33923e-67	1.02473e-65
-	maker-tulip_contig_407_pilon_pilon-augustus-gene-4.69-mRNA-1	exigua_EL1	exigua_egg	96.736	685	390.868	-2.82338	0.163124	-17.3082	4.0785e-67	1.24834e-65
3	augustus_masked-tulip_contig_503_pilon_pilon-processed-gene-1.49-mRNA-1	exigua_EL1	exigua_egg	1406.71	3.64697	705.18	8.63347	0.499075	17.2989	4.79205e-67	1.46294e-65
1	augustus_masked-tulip_contig_514_pilon_pilon-processed-gene-1.45-mRNA-1	exigua_EL1	exigua_egg	163.39	1280.05	721.723	-2.97052	0.17173	-17.2976	4.90273e-67	1.49286e-65
1	maker-tulip_contig_33_pilon_pilon-augustus-gene-3.58-mRNA-1	exigua_EL1	exigua_egg	3531.59	862.132	2196.86	2.03381	0.117827	17.261	9.24302e-67	2.80721e-65
1	maker-tulip_contig_290_pilon_pilon-augustus-gene-2.3-mRNA-1	exigua_EL1	exigua_egg	206.067	1422.7	814.383	-2.78726	0.161498	-17.2588	9.61022e-67	2.91123e-65
5	maker-tulip_contig_694_pilon_pilon-augustus-gene-0.14-mRNA-1	exigua_EL1	exigua_egg	517.075	10.218	263.647	5.65818	0.328104	17.2451	1.21883e-66	3.68275e-65
1	maker-tulip_contig_784_pilon_pilon-augustus-gene-0.22-mRNA-1	exigua_EL1	exigua_egg	507.324	12.1695	259.747	5.39631	0.312979	17.2417	1.29128e-66	3.89168e-65
3	maker-tulip_contig_236_pilon_pilon-augustus-gene-4.83-mRNA-1	exigua_EL1	exigua_egg	2225.04	523.121	1374.08	2.08881	0.121246	17.2279	1.63996e-66	4.91738e-65
5	maker-tulip_contig_145_pilon_pilon-augustus-gene-5.26-mRNA-1	exigua_EL1	exigua_egg	27329.2	1.10456	13665.2	14.6531	0.851551	17.2076	2.3287e-66	6.96483e-65
1	maker-tulip_contig_611_pilon_pilon-augustus-gene-1.12-mRNA-1	exigua_EL1	exigua_egg	523.362	20.2888	271.825	4.69653	0.273145	17.1943	2.93073e-66	8.74323e-65
1	maker-tulip_contig_351_pilon_pilon-augustus-gene-1.68-mRNA-1	exigua_EL1	exigua_egg	503.859	20.7285	262.294	4.59815	0.267431	17.1938	2.95563e-66	8.79523e-65
1	augustus_masked-tulip_contig_586_pilon_pilon-processed-gene-9.8-mRNA-1	exigua_EL1	exigua_egg	611.889	6.8735	309.381	6.5061	0.378446	17.1916	3.06852e-66	9.10817e-65
3	maker-tulip_contig_318_pilon_pilon-augustus-gene-3.8-mRNA-1	exigua_EL1	exigua_egg	2700.85	114.836	1407.84	4.55207	0.26522	17.1634	4.99286e-66	1.47829e-64
3	maker-tulip_contig_126_pilon_pilon-augustus-gene-2.37-mRNA-1	exigua_EL1	exigua_egg	487.653	24.2418	255.948	4.32505	0.252459	17.1317	8.61299e-66	2.54375e-64
1	maker-tulip_contig_361_pilon_pilon-augustus-gene-1.37-mRNA-1	exigua_EL1	exigua_egg	73.0648	867.838	470.452	-3.57015	0.208533	-17.1203	1.04748e-65	3.08588e-64
1	augustus_masked-tulip_contig_22_pilon_pilon-processed-gene-0.28-mRNA-1	exigua_EL1	exigua_egg	475.17	29.4023	252.286	4.0172	0.234718	17.115	1.14783e-65	3.37307e-64
3	maker-tulip_contig_490_pilon_pilon-augustus-gene-2.30-mRNA-1	exigua_EL1	exigua_egg	1088.31	7.73956	548.027	7.13135	0.416809	17.1094	1.26288e-65	3.70192e-64
3	maker-tulip_contig_217_pilon_pilon-augustus-gene-1.166-mRNA-1	exigua_EL1	exigua_egg	1149.63	78.3447	613.986	3.8707	0.226282	17.1057	1.34679e-65	3.93812e-64
1	maker-tulip_contig_623_pilon_pilon-augustus-gene-4.55-mRNA-1	exigua_EL1	exigua_egg	458.788	3293.92	1876.35	-2.84355	0.166379	-17.0908	1.73743e-65	5.0678e-64
3	maker-tulip_contig_126_pilon_pilon-augustus-gene-2.212-mRNA-1	exigua_EL1	exigua_egg	1007.81	111.947	559.879	3.17013	0.1855	17.0897	1.77173e-65	5.15507e-64
1	maker-tulip_contig_121_pilon_pilon-augustus-gene-1.2-mRNA-1	exigua_EL1	exigua_egg	328.731	1703.22	1015.98	-2.37358	0.139044	-17.0707	2.45173e-65	7.11606e-64
5	augustus_masked-tulip_contig_46_pilon_pilon-processed-gene-0.3-mRNA-1	exigua_EL1	exigua_egg	854.253	23.083	438.668	5.21385	0.305689	17.056	3.15217e-65	9.12657e-64
1	maker-tulip_contig_126_pilon_pilon-augustus-gene-0.6-mRNA-1	exigua_EL1	exigua_egg	450.933	12.2585	231.596	5.1912	0.304372	17.0554	3.18427e-65	9.19693e-64
1	maker-tulip_contig_212_pilon_pilon-augustus-gene-0.21-mRNA-1	exigua_EL1	exigua_egg	442.868	14.766	228.817	4.90141	0.287475	17.0499	3.5032e-65	1.00933e-63
1	maker-tulip_contig_698_pilon_pilon-augustus-gene-3.16-mRNA-1	exigua_EL1	exigua_egg	237.555	1530.76	884.155	-2.68782	0.157648	-17.0495	3.52338e-65	1.01267e-63
1	maker-tulip_contig_276_pilon_pilon-augustus-gene-3.5-mRNA-1	exigua_EL1	exigua_egg	221.666	1564.88	893.275	-2.81895	0.165468	-17.0362	4.42487e-65	1.26868e-63
3	maker-tulip_contig_339_pilon_pilon-augustus-gene-0.79-mRNA-1	exigua_EL1	exigua_egg	1072.01	60.0221	566.015	4.16741	0.244634	17.0353	4.49597e-65	1.28594e-63
1	maker-tulip_contig_506_pilon_pilon-augustus-gene-1.70-mRNA-1	exigua_EL1	exigua_egg	246.623	1234.87	740.744	-2.32364	0.13644	-17.0305	4.8802e-65	1.39245e-63
3	augustus_masked-tulip_contig_571_pilon_pilon-processed-gene-0.5-mRNA-1	exigua_EL1	exigua_egg	715.513	7.39463	361.454	6.59253	0.387139	17.0288	5.0193e-65	1.42868e-63
1	augustus_masked-tulip_contig_669_pilon_pilon-processed-gene-1.1-mRNA-1	exigua_EL1	exigua_egg	478.762	3844.39	2161.57	-3.00501	0.176513	-17.0243	5.42667e-65	1.54091e-63
1	maker-tulip_contig_4_pilon_pilon-augustus-gene-1.23-mRNA-1	exigua_EL1	exigua_egg	915.845	22.5021	469.173	5.36694	0.315388	17.0169	6.15221e-65	1.74273e-63
3	maker-tulip_contig_22_pilon_pilon-augustus-gene-0.6-mRNA-1	exigua_EL1	exigua_egg	748.976	72.9679	410.972	3.3614	0.197548	17.0156	6.29048e-65	1.77763e-63
1	maker-tulip_contig_16_pilon_pilon-augustus-gene-0.10-mRNA-1	exigua_EL1	exigua_egg	276.186	2652.43	1464.31	-3.26372	0.192151	-16.9852	1.05739e-64	2.97382e-63
3	maker-tulip_contig_831_pilon_pilon-augustus-gene-4.65-mRNA-1	exigua_EL1	exigua_egg	784.416	4.51894	394.467	7.41804	0.437039	16.9734	1.29224e-64	3.62566e-63
1	maker-tulip_contig_555_pilon_pilon-augustus-gene-0.20-mRNA-1	exigua_EL1	exigua_egg	2053.86	285.971	1169.91	2.84465	0.167629	16.97	1.37019e-64	3.83523e-63
1	maker-tulip_contig_372_pilon_pilon-augustus-gene-0.8-mRNA-1	exigua_EL1	exigua_egg	27.5428	618.583	323.063	-4.49345	0.264794	-16.9696	1.37951e-64	3.85216e-63
1	maker-tulip_contig_199_pilon_pilon-augustus-gene-3.27-mRNA-1	exigua_EL1	exigua_egg	1159.04	9322.72	5240.88	-3.00775	0.177396	-16.955	1.76775e-64	4.92463e-63
1	maker-tulip_contig_400_pilon_pilon-augustus-gene-0.0-mRNA-1	exigua_EL1	exigua_egg	2073.78	487.549	1280.67	2.08906	0.12336	16.9347	2.49766e-64	6.94162e-63
3	augustus_masked-tulip_contig_234_pilon_pilon-processed-gene-5.59-mRNA-1	exigua_EL1	exigua_egg	762.003	5.5943	383.799	7.07718	0.418288	16.9194	3.2377e-64	8.97718e-63
1	maker-tulip_contig_704_pilon_pilon-augustus-gene-1.7-mRNA-1	exigua_EL1	exigua_egg	463.043	24.2925	243.668	4.2633	0.252261	16.9004	4.4718e-64	1.23409e-62
1	maker-tulip_contig_353_pilon_pilon-augustus-gene-0.8-mRNA-1	exigua_EL1	exigua_egg	953.678	4045.55	2499.62	-2.08475	0.12339	-16.8956	4.84983e-64	1.33529e-62
5	maker-tulip_contig_75_pilon_pilon-augustus-gene-1.0-mRNA-1	exigua_EL1	exigua_egg	443.953	22.0385	232.996	4.32262	0.255873	16.8936	5.01356e-64	1.37715e-62
1	maker-tulip_contig_603_pilon_pilon-augustus-gene-3.39-mRNA-1	exigua_EL1	exigua_egg	360.187	1924.88	1142.53	-2.41768	0.143289	-16.8728	7.13682e-64	1.95582e-62
3	augustus_masked-tulip_contig_324_pilon_pilon-processed-gene-0.16-mRNA-1	exigua_EL1	exigua_egg	2860.29	2.04629	1431.17	10.4003	0.616528	16.8692	7.57925e-64	2.07225e-62
1	maker-tulip_contig_407_pilon_pilon-augustus-gene-4.35-mRNA-1	exigua_EL1	exigua_egg	31.2644	638.248	334.756	-4.34978	0.25793	-16.8642	8.25411e-64	2.25154e-62
3	augustus_masked-tulip_contig_343_pilon_pilon-processed-gene-0.90-mRNA-1	exigua_EL1	exigua_egg	540.767	30.5184	285.643	4.15127	0.246236	16.8589	9.0257e-64	2.45633e-62
1	augustus_masked-tulip_contig_55_pilon_pilon-processed-gene-0.5-mRNA-1	exigua_EL1	exigua_egg	676.036	5.62925	340.832	6.90309	0.410256	16.8263	1.56638e-63	4.25306e-62
1	maker-tulip_contig_837_pilon_pilon-augustus-gene-6.24-mRNA-1	exigua_EL1	exigua_egg	113.188	1447.56	780.373	-3.67738	0.218736	-16.812	1.99392e-63	5.40147e-62
3	augustus_masked-tulip_contig_208_pilon_pilon-processed-gene-1.43-mRNA-1	exigua_EL1	exigua_egg	3989.67	1.92821	1995.8	11.1378	0.663065	16.7975	2.54683e-63	6.88346e-62
1	maker-tulip_contig_217_pilon_pilon-augustus-gene-2.9-mRNA-1	exigua_EL1	exigua_egg	188.447	1185.66	687.052	-2.65319	0.157974	-16.7951	2.65267e-63	7.15311e-62
4	maker-tulip_contig_218_pilon_pilon-augustus-gene-0.101-mRNA-1	exigua_EL1	exigua_egg	21405.5	1.10456	10703.3	14.3006	0.85301	16.7649	4.41107e-63	1.18676e-61
5	maker-tulip_contig_566_pilon_pilon-augustus-gene-0.8-mRNA-1	exigua_EL1	exigua_egg	1114.91	75.1806	595.043	3.88778	0.232257	16.7391	6.80361e-63	1.82628e-61
12	augustus_masked-tulip_contig_307_pilon_pilon-processed-gene-1.9-mRNA-1	exigua_EL1	exigua_egg	14.3354	3726.65	1870.49	-8.02308	0.479843	-16.7202	9.33763e-63	2.50079e-61
8	maker-tulip_contig_195_pilon_pilon-augustus-gene-0.21-mRNA-1	exigua_EL1	exigua_egg	21.5822	695.386	358.484	-5.00963	0.299706	-16.7151	1.01689e-62	2.71724e-61
5	maker-tulip_contig_378_pilon_pilon-augustus-gene-3.1-mRNA-1	exigua_EL1	exigua_egg	1329.96	3.5365	666.746	8.5563	0.512126	16.7074	1.15724e-62	3.08527e-61
6	augustus_masked-tulip_contig_39_pilon_pilon-processed-gene-0.0-mRNA-1	exigua_EL1	exigua_egg	1126.67	5.90442	566.288	7.55739	0.453053	16.681	1.80106e-62	4.7909e-61
1	augustus_masked-tulip_contig_274_pilon_pilon-processed-gene-2.14-mRNA-1	exigua_EL1	exigua_egg	438.092	12.5261	225.309	5.14298	0.308374	16.6778	1.90217e-62	5.04847e-61
1	maker-tulip_contig_705_pilon_pilon-augustus-gene-0.4-mRNA-1	exigua_EL1	exigua_egg	645.81	22.4458	334.128	4.85345	0.291262	16.6635	2.41448e-62	6.39375e-61
3	augustus_masked-tulip_contig_441_pilon_pilon-processed-gene-9.17-mRNA-1	exigua_EL1	exigua_egg	7432.68	1513.12	4472.9	2.29599	0.137796	16.6623	2.46543e-62	6.51405e-61
1	maker-tulip_contig_102_pilon_pilon-augustus-gene-0.46-mRNA-1	exigua_EL1	exigua_egg	860.214	4.8272	432.521	7.54058	0.452769	16.6543	2.81386e-62	7.41802e-61
1	maker-tulip_contig_610_pilon_pilon-augustus-gene-1.29-mRNA-1	exigua_EL1	exigua_egg	811.509	5.85781	408.683	7.08496	0.425861	16.6368	3.77177e-62	9.9211e-61
-	maker-tulip_contig_228_pilon_pilon-augustus-gene-1.93-mRNA-1	exigua_EL1	exigua_egg	8.20454	424.54	216.372	-5.69167	0.342271	-16.6292	4.2855e-62	1.12473e-60
1	maker-tulip_contig_198_pilon_pilon-augustus-gene-5.35-mRNA-1	exigua_EL1	exigua_egg	139.689	1273.92	706.804	-3.18855	0.191811	-16.6234	4.71837e-62	1.23558e-60
1	maker-tulip_contig_711_pilon_pilon-augustus-gene-0.35-mRNA-1	exigua_EL1	exigua_egg	33.1084	480.266	256.687	-3.85682	0.232632	-16.579	9.88111e-62	2.5818e-60
3	maker-tulip_contig_490_pilon_pilon-augustus-gene-2.32-mRNA-1	exigua_EL1	exigua_egg	1649.94	2.68955	826.317	9.19504	0.555174	16.5624	1.30205e-61	3.39454e-60
1	maker-tulip_contig_58_pilon_pilon-augustus-gene-1.0-mRNA-1	exigua_EL1	exigua_egg	551.026	2204.9	1377.97	-2.00046	0.120819	-16.5575	1.41342e-61	3.67676e-60
-	maker-tulip_contig_247_pilon_pilon-augustus-gene-1.47-mRNA-1	exigua_EL1	exigua_egg	623.66	11.1828	317.421	5.79071	0.349868	16.5511	1.57133e-61	4.07854e-60
3	maker-tulip_contig_391_pilon_pilon-augustus-gene-0.8-mRNA-1	exigua_EL1	exigua_egg	524.434	8.61557	266.525	5.94646	0.359994	16.5182	2.71285e-61	7.01056e-60
3	maker-tulip_contig_567_pilon_pilon-augustus-gene-0.2-mRNA-1	exigua_EL1	exigua_egg	665.988	7.28244	336.635	6.54972	0.396908	16.5019	3.55741e-61	9.17297e-60
1	augustus_masked-tulip_contig_52_pilon_pilon-processed-gene-2.13-mRNA-1	exigua_EL1	exigua_egg	230.847	3152.26	1691.55	-3.77082	0.228739	-16.4853	4.68347e-61	1.20502e-59
1	maker-tulip_contig_611_pilon_pilon-augustus-gene-3.56-mRNA-1	exigua_EL1	exigua_egg	84.927	900.881	492.904	-3.40715	0.206727	-16.4814	4.99008e-61	1.28111e-59
1	maker-tulip_contig_455_pilon_pilon-augustus-gene-1.24-mRNA-1	exigua_EL1	exigua_egg	381.056	2518.18	1449.62	-2.72427	0.165406	-16.4702	6.00818e-61	1.53914e-59
1	maker-tulip_contig_338_pilon_pilon-augustus-gene-0.39-mRNA-1	exigua_EL1	exigua_egg	484.346	15.8531	250.099	4.93069	0.299397	16.4687	6.15573e-61	1.57352e-59
5	maker-tulip_contig_44_pilon_pilon-augustus-gene-6.23-mRNA-1	exigua_EL1	exigua_egg	3804.27	730.322	2267.3	2.3814	0.144686	16.459	7.22841e-61	1.84371e-59
1	maker-tulip_contig_479_pilon_pilon-augustus-gene-2.2-mRNA-1	exigua_EL1	exigua_egg	27.4448	449.225	238.335	-4.03379	0.245132	-16.4556	7.6456e-61	1.94591e-59
1	maker-tulip_contig_482_pilon_pilon-augustus-gene-2.7-mRNA-1	exigua_EL1	exigua_egg	462.24	2711.92	1587.08	-2.55228	0.155301	-16.4344	1.08459e-60	2.75448e-59
5	augustus_masked-tulip_contig_837_pilon_pilon-processed-gene-1.11-mRNA-1	exigua_EL1	exigua_egg	1004.55	5.01505	504.784	7.66254	0.466304	16.4325	1.11946e-60	2.83693e-59
6	maker-tulip_contig_710_pilon_pilon-augustus-gene-0.65-mRNA-1	exigua_EL1	exigua_egg	1316.45	8.37707	662.411	7.28518	0.443439	16.4288	1.18916e-60	3.0071e-59
1	maker-tulip_contig_605_pilon_pilon-augustus-gene-0.45-mRNA-1	exigua_EL1	exigua_egg	2972.26	242.628	1607.44	3.61655	0.220165	16.4265	1.23613e-60	3.11917e-59
1	maker-tulip_contig_132_pilon_pilon-augustus-gene-0.7-mRNA-1	exigua_EL1	exigua_egg	1437.4	42.1184	739.76	5.10162	0.310899	16.4092	1.64287e-60	4.13666e-59
1	maker-tulip_contig_39_pilon_pilon-augustus-gene-0.20-mRNA-1	exigua_EL1	exigua_egg	586.164	4687.78	2636.97	-2.99944	0.182805	-16.4078	1.68159e-60	4.22513e-59
1	augustus_masked-tulip_contig_550_pilon_pilon-processed-gene-0.23-mRNA-1	exigua_EL1	exigua_egg	69.1087	647.183	358.146	-3.22687	0.196805	-16.3963	2.03167e-60	5.09388e-59
5	augustus_masked-tulip_contig_192_pilon_pilon-processed-gene-1.3-mRNA-1	exigua_EL1	exigua_egg	624.039	70.7107	347.375	3.14558	0.191954	16.3872	2.36265e-60	5.91114e-59
1	augustus_masked-tulip_contig_199_pilon_pilon-processed-gene-4.13-mRNA-1	exigua_EL1	exigua_egg	218.319	1354.81	786.566	-2.63409	0.160812	-16.38	2.65936e-60	6.63939e-59
-	maker-tulip_contig_537_pilon_pilon-augustus-gene-2.31-mRNA-1	exigua_EL1	exigua_egg	478.259	14.4617	246.361	5.04595	0.308452	16.359	3.75429e-60	9.35319e-59
3	augustus_masked-tulip_contig_252_pilon_pilon-processed-gene-1.29-mRNA-1	exigua_EL1	exigua_egg	1013.27	9.42942	511.348	6.73672	0.412572	16.3286	6.17853e-60	1.53603e-58
8	maker-tulip_contig_89_pilon_pilon-augustus-gene-0.27-mRNA-1	exigua_EL1	exigua_egg	32.9941	920.782	476.888	-4.80436	0.29449	-16.3142	7.82234e-60	1.9406e-58
5	augustus_masked-tulip_contig_424_pilon_pilon-processed-gene-2.120-mRNA-1	exigua_EL1	exigua_egg	908.079	9.48909	458.784	6.54147	0.401294	16.3009	9.71868e-60	2.40598e-58
5	maker-tulip_contig_284_pilon_pilon-augustus-gene-1.32-mRNA-1	exigua_EL1	exigua_egg	1550.99	121.603	836.294	3.67033	0.225422	16.2821	1.32346e-59	3.26953e-58
8	maker-tulip_contig_362_pilon_pilon-augustus-gene-1.22-mRNA-1	exigua_EL1	exigua_egg	49.6326	541.681	295.657	-3.44891	0.211865	-16.2788	1.39492e-59	3.43886e-58
1	maker-tulip_contig_272_pilon_pilon-augustus-gene-1.4-mRNA-1	exigua_EL1	exigua_egg	119.144	1343.97	731.557	-3.49584	0.215069	-16.2545	2.07464e-59	5.10387e-58
3	maker-tulip_contig_217_pilon_pilon-augustus-gene-1.30-mRNA-1	exigua_EL1	exigua_egg	5371.56	294.103	2832.83	4.19271	0.257948	16.2541	2.09024e-59	5.13154e-58
8	maker-tulip_contig_363_pilon_pilon-augustus-gene-1.3-mRNA-1	exigua_EL1	exigua_egg	8.42967	507.507	257.968	-5.90033	0.363343	-16.239	2.67207e-59	6.54631e-58
8	augustus_masked-tulip_contig_272_pilon_pilon-processed-gene-1.21-mRNA-1	exigua_EL1	exigua_egg	4.25974	546.574	275.417	-7.00363	0.431413	-16.2342	2.89088e-59	7.06767e-58
1	maker-tulip_contig_236_pilon_pilon-augustus-gene-7.96-mRNA-1	exigua_EL1	exigua_egg	2784.02	430.87	1607.45	2.69327	0.166155	16.2094	4.32786e-59	1.05589e-57
1	maker-tulip_contig_270_pilon_pilon-augustus-gene-1.11-mRNA-1	exigua_EL1	exigua_egg	275.852	1417.39	846.619	-2.36074	0.145664	-16.2068	4.5162e-59	1.09957e-57
8	maker-tulip_contig_323_pilon_pilon-augustus-gene-6.35-mRNA-1	exigua_EL1	exigua_egg	160.999	2387.13	1274.06	-3.88935	0.240057	-16.2018	4.89764e-59	1.18997e-57
3	maker-tulip_contig_778_pilon_pilon-augustus-gene-0.23-mRNA-1	exigua_EL1	exigua_egg	661.98	5.85206	333.916	6.7907	0.419144	16.2013	4.93495e-59	1.19657e-57
1	maker-tulip_contig_147_pilon_pilon-augustus-gene-0.87-mRNA-1	exigua_EL1	exigua_egg	451.248	2006.17	1228.71	-2.15212	0.132895	-16.1941	5.54856e-59	1.34259e-57
1	maker-tulip_contig_143_pilon_pilon-augustus-gene-0.4-mRNA-1	exigua_EL1	exigua_egg	454.529	9.64618	232.088	5.52963	0.341546	16.19	5.93505e-59	1.43317e-57
1	maker-tulip_contig_610_pilon_pilon-augustus-gene-3.29-mRNA-1	exigua_EL1	exigua_egg	505.351	2405.1	1455.23	-2.25091	0.139092	-16.1828	6.66564e-59	1.60302e-57
1	maker-tulip_contig_1_pilon_pilon-augustus-gene-1.27-mRNA-1	exigua_EL1	exigua_egg	2010.63	8135.39	5073.01	-2.01662	0.124713	-16.1701	8.20041e-59	1.9681e-57
5	maker-tulip_contig_93_pilon_pilon-augustus-gene-0.0-mRNA-1	exigua_EL1	exigua_egg	425.981	25.1585	225.57	4.0844	0.252785	16.1576	1.0032e-58	2.40279e-57
1	augustus_masked-tulip_contig_707_pilon_pilon-processed-gene-0.95-mRNA-1	exigua_EL1	exigua_egg	52.3385	541.921	297.13	-3.37147	0.208681	-16.1561	1.02849e-58	2.45836e-57
5	augustus_masked-tulip_contig_327_pilon_pilon-processed-gene-10.11-mRNA-1	exigua_EL1	exigua_egg	1225.66	197.218	711.437	2.63648	0.163224	16.1525	1.09079e-58	2.602e-57
5	augustus_masked-tulip_contig_698_pilon_pilon-processed-gene-0.0-mRNA-1	exigua_EL1	exigua_egg	630.416	4.88128	317.649	6.99606	0.434221	16.1118	2.10923e-58	5.02124e-57
5	augustus_masked-tulip_contig_159_pilon_pilon-processed-gene-2.50-mRNA-1	exigua_EL1	exigua_egg	4309.26	378.202	2343.73	3.50873	0.217909	16.1018	2.4778e-58	5.87494e-57
1	augustus_masked-tulip_contig_72_pilon_pilon-processed-gene-0.5-mRNA-1	exigua_EL1	exigua_egg	51.4328	475.871	263.652	-3.20919	0.199619	-16.0766	3.72308e-58	8.8098e-57
-	maker-tulip_contig_321_pilon_pilon-augustus-gene-1.41-mRNA-1	exigua_EL1	exigua_egg	1345.54	2.5017	674.022	9.08729	0.566015	16.0549	5.28484e-58	1.24803e-56
1	maker-tulip_contig_394_pilon_pilon-augustus-gene-1.0-mRNA-1	exigua_EL1	exigua_egg	360.786	1532.48	946.635	-2.08671	0.13002	-16.0491	5.79556e-58	1.3659e-56
1	maker-tulip_contig_360_pilon_pilon-augustus-gene-1.17-mRNA-1	exigua_EL1	exigua_egg	23.666	418.88	221.273	-4.14267	0.258576	-16.0211	9.10316e-58	2.14115e-56
4	maker-tulip_contig_927_pilon_pilon-augustus-gene-0.4-mRNA-1	exigua_EL1	exigua_egg	12920.4	1.02315	6460.72	13.5744	0.847386	16.0192	9.38641e-58	2.20338e-56
1	maker-tulip_contig_196_pilon_pilon-augustus-gene-1.54-mRNA-1	exigua_EL1	exigua_egg	250.626	1192.53	721.576	-2.25089	0.140623	-16.0066	1.14982e-57	2.69372e-56
1	augustus_masked-tulip_contig_85_pilon_pilon-processed-gene-1.14-mRNA-1	exigua_EL1	exigua_egg	4123.44	233.258	2178.35	4.14169	0.258768	16.0054	1.17144e-57	2.73893e-56
1	maker-tulip_contig_55_pilon_pilon-augustus-gene-0.73-mRNA-1	exigua_EL1	exigua_egg	137.516	1028.56	583.038	-2.9033	0.181545	-15.9921	1.44946e-57	3.38225e-56
1	maker-tulip_contig_236_pilon_pilon-augustus-gene-4.47-mRNA-1	exigua_EL1	exigua_egg	91.742	1220.87	656.306	-3.73319	0.23355	-15.9846	1.63714e-57	3.81266e-56
1	augustus_masked-tulip_contig_504_pilon_pilon-processed-gene-0.8-mRNA-1	exigua_EL1	exigua_egg	459.462	7.85594	233.659	5.88307	0.368069	15.9836	1.66282e-57	3.86482e-56
1	maker-tulip_contig_280_pilon_pilon-augustus-gene-1.56-mRNA-1	exigua_EL1	exigua_egg	1025.1	5671.34	3348.22	-2.46788	0.154485	-15.9748	1.91354e-57	4.4388e-56
1	maker-tulip_contig_711_pilon_pilon-augustus-gene-2.32-mRNA-1	exigua_EL1	exigua_egg	79.5489	692.05	385.799	-3.11937	0.19532	-15.9706	2.04969e-57	4.7453e-56
1	maker-tulip_contig_343_pilon_pilon-augustus-gene-0.72-mRNA-1	exigua_EL1	exigua_egg	19.9994	412.678	216.339	-4.36316	0.273281	-15.9659	2.2097e-57	5.10572e-56
1	augustus_masked-tulip_contig_384_pilon_pilon-processed-gene-0.109-mRNA-1	exigua_EL1	exigua_egg	161.202	935.872	548.537	-2.53747	0.158948	-15.9642	2.26986e-57	5.23445e-56
-	augustus_masked-tulip_contig_89_pilon_pilon-processed-gene-3.3-mRNA-1	exigua_EL1	exigua_egg	538.571	19.8177	279.194	4.75051	0.297605	15.9625	2.33351e-57	5.37071e-56
1	maker-tulip_contig_711_pilon_pilon-augustus-gene-2.43-mRNA-1	exigua_EL1	exigua_egg	126.436	1270.05	698.243	-3.32735	0.208622	-15.9492	2.88471e-57	6.6264e-56
1	augustus_masked-tulip_contig_610_pilon_pilon-processed-gene-2.22-mRNA-1	exigua_EL1	exigua_egg	644.694	4.28448	324.489	7.24762	0.45446	15.9478	2.95213e-57	6.76808e-56
3	maker-tulip_contig_44_pilon_pilon-augustus-gene-6.36-mRNA-1	exigua_EL1	exigua_egg	380.709	16.8122	198.76	4.49233	0.281718	15.9462	3.02787e-57	6.92824e-56
5	maker-tulip_contig_66_pilon_pilon-augustus-gene-3.31-mRNA-1	exigua_EL1	exigua_egg	1259.93	143.687	701.809	3.13561	0.196763	15.9359	3.56841e-57	8.14926e-56
5	maker-tulip_contig_93_pilon_pilon-augustus-gene-0.2-mRNA-1	exigua_EL1	exigua_egg	2077.84	410.72	1244.28	2.33875	0.146789	15.9327	3.75826e-57	8.56621e-56
1	maker-tulip_contig_236_pilon_pilon-augustus-gene-0.40-mRNA-1	exigua_EL1	exigua_egg	801.855	3511.93	2156.89	-2.13073	0.133743	-15.9315	3.82882e-57	8.7102e-56
1	maker-tulip_contig_547_pilon_pilon-augustus-gene-0.17-mRNA-1	exigua_EL1	exigua_egg	719.851	12.6109	366.231	5.80313	0.364414	15.9246	4.2801e-57	9.71806e-56
1	maker-tulip_contig_841_pilon_pilon-augustus-gene-0.58-mRNA-1	exigua_EL1	exigua_egg	185.499	898.698	542.098	-2.27618	0.142951	-15.9228	4.4051e-57	9.98263e-56
1	maker-tulip_contig_230_pilon_pilon-augustus-gene-0.51-mRNA-1	exigua_EL1	exigua_egg	1393.77	6.51116	700.143	7.76423	0.487631	15.9224	4.43398e-57	1.00288e-55
3	maker-tulip_contig_217_pilon_pilon-augustus-gene-3.26-mRNA-1	exigua_EL1	exigua_egg	874.377	24.6348	449.506	5.13782	0.322799	15.9165	4.86946e-57	1.09927e-55
3	maker-tulip_contig_740_pilon_pilon-augustus-gene-0.26-mRNA-1	exigua_EL1	exigua_egg	975.24	11.7821	493.511	6.40534	0.402966	15.8955	6.80993e-57	1.53438e-55
1	maker-tulip_contig_701_pilon_pilon-augustus-gene-0.8-mRNA-1	exigua_EL1	exigua_egg	103.621	822.167	462.894	-2.98761	0.18816	-15.878	9.00347e-57	2.02475e-55
-	maker-tulip_contig_102_pilon_pilon-augustus-gene-0.53-mRNA-1	exigua_EL1	exigua_egg	12.4265	497.315	254.871	-5.3196	0.335126	-15.8734	9.6833e-57	2.17349e-55
1	maker-tulip_contig_626_pilon_pilon-augustus-gene-1.55-mRNA-1	exigua_EL1	exigua_egg	622.769	49.8592	336.314	3.63421	0.22897	15.872	9.90095e-57	2.21811e-55
1	maker-tulip_contig_604_pilon_pilon-augustus-gene-2.8-mRNA-1	exigua_EL1	exigua_egg	451.98	19.0953	235.538	4.58346	0.288924	15.8639	1.12694e-56	2.5199e-55
3	maker-tulip_contig_236_pilon_pilon-augustus-gene-5.18-mRNA-1	exigua_EL1	exigua_egg	2066.33	305.815	1186.07	2.75652	0.173868	15.8542	1.31588e-56	2.93681e-55
1	maker-tulip_contig_281_pilon_pilon-augustus-gene-2.21-mRNA-1	exigua_EL1	exigua_egg	52.6677	567.235	309.951	-3.42927	0.216386	-15.8479	1.45336e-56	3.2375e-55
5	maker-tulip_contig_2_pilon_pilon-augustus-gene-6.23-mRNA-1	exigua_EL1	exigua_egg	544.141	15.0801	279.61	5.18821	0.327547	15.8396	1.65966e-56	3.68313e-55
1	maker-tulip_contig_79_pilon_pilon-augustus-gene-0.10-mRNA-1	exigua_EL1	exigua_egg	777.314	20.0644	398.689	5.29933	0.335205	15.8092	2.68833e-56	5.94358e-55
11	maker-tulip_contig_862_pilon_pilon-augustus-gene-1.63-mRNA-1	exigua_EL1	exigua_egg	249.594	1952.3	1100.95	-2.96755	0.187731	-15.8075	2.76326e-56	6.09781e-55
1	maker-tulip_contig_654_pilon_pilon-augustus-gene-1.79-mRNA-1	exigua_EL1	exigua_egg	82.5737	716.15	399.362	-3.1149	0.197195	-15.796	3.31381e-56	7.29906e-55
5	maker-tulip_contig_281_pilon_pilon-augustus-gene-3.33-mRNA-1	exigua_EL1	exigua_egg	923.6	34.5794	479.09	4.72719	0.29937	15.7905	3.61794e-56	7.95407e-55
5	maker-tulip_contig_525_pilon_pilon-augustus-gene-0.24-mRNA-1	exigua_EL1	exigua_egg	625.62	5.32503	315.472	6.88249	0.436665	15.7615	5.72682e-56	1.2567e-54
1	maker-tulip_contig_40_pilon_pilon-augustus-gene-0.31-mRNA-1	exigua_EL1	exigua_egg	781.054	3496.81	2138.93	-2.16245	0.137334	-15.7459	7.33278e-56	1.60612e-54
1	augustus_masked-tulip_contig_58_pilon_pilon-processed-gene-1.51-mRNA-1	exigua_EL1	exigua_egg	249.713	1199.98	724.846	-2.26444	0.144033	-15.7217	1.0746e-55	2.34937e-54
5	augustus_masked-tulip_contig_426_pilon_pilon-processed-gene-1.25-mRNA-1	exigua_EL1	exigua_egg	496.783	9.3985	253.091	5.74906	0.365699	15.7208	1.09014e-55	2.37894e-54
11	maker-tulip_contig_113_pilon_pilon-augustus-gene-0.0-mRNA-1	exigua_EL1	exigua_egg	2681.24	15576.8	9129.03	-2.53843	0.161491	-15.7187	1.12598e-55	2.45259e-54
11	maker-tulip_contig_333_pilon_pilon-augustus-gene-1.11-mRNA-1	exigua_EL1	exigua_egg	465.364	2557.18	1511.27	-2.45809	0.156426	-15.7141	1.21021e-55	2.63119e-54
1	maker-tulip_contig_553_pilon_pilon-augustus-gene-0.89-mRNA-1	exigua_EL1	exigua_egg	71.8612	497.273	284.567	-2.79099	0.177773	-15.6998	1.51708e-55	3.29232e-54
1	maker-tulip_contig_303_pilon_pilon-augustus-gene-0.29-mRNA-1	exigua_EL1	exigua_egg	810.447	3.32534	406.886	7.99027	0.509594	15.6797	2.08326e-55	4.51271e-54
1	maker-tulip_contig_178_pilon_pilon-augustus-gene-0.71-mRNA-1	exigua_EL1	exigua_egg	153.5	921.669	537.585	-2.58582	0.165017	-15.67	2.42411e-55	5.24141e-54
11	maker-tulip_contig_3_pilon_pilon-augustus-gene-1.37-mRNA-1	exigua_EL1	exigua_egg	4831.14	24728.2	14779.7	-2.35568	0.150345	-15.6685	2.48387e-55	5.3608e-54
1	maker-tulip_contig_217_pilon_pilon-augustus-gene-3.45-mRNA-1	exigua_EL1	exigua_egg	344.461	2263.04	1303.75	-2.71536	0.173407	-15.6589	2.89045e-55	6.22689e-54
4	augustus_masked-tulip_contig_82_pilon_pilon-processed-gene-1.0-mRNA-1	exigua_EL1	exigua_egg	596.894	21.0501	308.972	4.8202	0.307837	15.6583	2.91563e-55	6.26967e-54
1	maker-tulip_contig_916_pilon_pilon-augustus-gene-2.190-mRNA-1	exigua_EL1	exigua_egg	181.483	1292.67	737.076	-2.83251	0.180972	-15.6517	3.23682e-55	6.94767e-54
5	maker-tulip_contig_854_pilon_pilon-augustus-gene-2.25-mRNA-1	exigua_EL1	exigua_egg	516.742	20.7443	268.743	4.64935	0.297097	15.6493	3.36108e-55	7.20127e-54
1	maker-tulip_contig_114_pilon_pilon-augustus-gene-0.4-mRNA-1	exigua_EL1	exigua_egg	264.053	1269.32	766.689	-2.26527	0.144783	-15.6459	3.54177e-55	7.57463e-54
-	maker-tulip_contig_76_pilon_pilon-augustus-gene-1.1-mRNA-1	exigua_EL1	exigua_egg	223.551	1723.9	973.725	-2.94667	0.188765	-15.6103	6.19703e-55	1.32054e-53
1	maker-tulip_contig_81_pilon_pilon-augustus-gene-0.55-mRNA-1	exigua_EL1	exigua_egg	156.776	866.099	511.437	-2.46542	0.157959	-15.6079	6.42871e-55	1.36743e-53
1	augustus_masked-tulip_contig_907_pilon_pilon-processed-gene-2.53-mRNA-1	exigua_EL1	exigua_egg	38.7097	491.839	265.274	-3.66768	0.235139	-15.5979	7.51868e-55	1.5964e-53
1	maker-tulip_contig_623_pilon_pilon-augustus-gene-1.36-mRNA-1	exigua_EL1	exigua_egg	250.625	1693.81	972.219	-2.75627	0.176723	-15.5965	7.68699e-55	1.6292e-53
3	maker-tulip_contig_401_pilon_pilon-augustus-gene-0.5-mRNA-1	exigua_EL1	exigua_egg	609.917	46.3154	328.116	3.71452	0.238449	15.5778	1.02972e-54	2.1785e-53
3	maker-tulip_contig_597_pilon_pilon-augustus-gene-5.34-mRNA-1	exigua_EL1	exigua_egg	5012.3	165	2588.65	4.92771	0.316345	15.577	1.04328e-54	2.20322e-53
1	maker-tulip_contig_43_pilon_pilon-augustus-gene-3.13-mRNA-1	exigua_EL1	exigua_egg	10.6215	469.715	240.168	-5.46407	0.351613	-15.54	1.8601e-54	3.92119e-53
1	maker-tulip_contig_59_pilon_pilon-augustus-gene-2.64-mRNA-1	exigua_EL1	exigua_egg	302.872	2407.29	1355.08	-2.99047	0.192453	-15.5387	1.89908e-54	3.99622e-53
3	augustus_masked-tulip_contig_690_pilon_pilon-processed-gene-3.75-mRNA-1	exigua_EL1	exigua_egg	2097.67	31.519	1064.59	6.07094	0.390758	15.5363	1.97022e-54	4.13852e-53
3	maker-tulip_contig_407_pilon_pilon-augustus-gene-3.44-mRNA-1	exigua_EL1	exigua_egg	8305.77	1132.28	4719.02	2.87538	0.185118	15.5327	2.08373e-54	4.36916e-53
1	maker-tulip_contig_429_pilon_pilon-augustus-gene-3.52-mRNA-1	exigua_EL1	exigua_egg	476.787	24.5866	250.687	4.27286	0.2751	15.532	2.1065e-54	4.40906e-53
1	maker-tulip_contig_597_pilon_pilon-augustus-gene-0.20-mRNA-1	exigua_EL1	exigua_egg	363.474	1506.68	935.076	-2.05184	0.132127	-15.5293	2.19786e-54	4.59213e-53
3	maker-tulip_contig_407_pilon_pilon-augustus-gene-7.39-mRNA-1	exigua_EL1	exigua_egg	427.153	23.2053	225.179	4.21152	0.271927	15.4877	4.20077e-54	8.71513e-53
1	maker-tulip_contig_182_pilon_pilon-augustus-gene-1.69-mRNA-1	exigua_EL1	exigua_egg	267.594	1158.33	712.963	-2.11351	0.13658	-15.4745	5.15564e-54	1.06773e-52
3	maker-tulip_contig_89_pilon_pilon-augustus-gene-4.17-mRNA-1	exigua_EL1	exigua_egg	760.198	153.392	456.795	2.30819	0.14939	15.4507	7.45761e-54	1.54176e-52
3	maker-tulip_contig_110_pilon_pilon-augustus-gene-2.68-mRNA-1	exigua_EL1	exigua_egg	1449.44	2.07535	725.757	9.41857	0.610278	15.4332	9.78334e-54	2.01903e-52
1	maker-tulip_contig_702_pilon_pilon-augustus-gene-0.95-mRNA-1	exigua_EL1	exigua_egg	52.8785	593.476	323.177	-3.48714	0.226257	-15.4123	1.35275e-53	2.77714e-52
1	augustus_masked-tulip_contig_270_pilon_pilon-processed-gene-3.204-mRNA-1	exigua_EL1	exigua_egg	265.489	1174.74	720.115	-2.14563	0.139241	-15.4094	1.41504e-53	2.89998e-52
1	augustus_masked-tulip_contig_54_pilon_pilon-processed-gene-2.72-mRNA-1	exigua_EL1	exigua_egg	58.5462	596.322	327.434	-3.34691	0.217248	-15.4059	1.49346e-53	3.05537e-52
1	maker-tulip_contig_89_pilon_pilon-augustus-gene-3.17-mRNA-1	exigua_EL1	exigua_egg	418.02	2172.26	1295.14	-2.37738	0.154362	-15.4013	1.60337e-53	3.27455e-52
5	augustus_masked-tulip_contig_468_pilon_pilon-processed-gene-3.149-mRNA-1	exigua_EL1	exigua_egg	697.629	10.8071	354.218	6.03052	0.392086	15.3806	2.2095e-53	4.50462e-52
1	maker-tulip_contig_3_pilon_pilon-augustus-gene-4.26-mRNA-1	exigua_EL1	exigua_egg	407.501	1748.09	1077.8	-2.10055	0.136579	-15.3798	2.23602e-53	4.55082e-52
3	augustus_masked-tulip_contig_426_pilon_pilon-processed-gene-1.9-mRNA-1	exigua_EL1	exigua_egg	461.55	29.257	245.403	3.97784	0.258768	15.3722	2.51429e-53	5.10834e-52
5	maker-tulip_contig_345_pilon_pilon-augustus-gene-2.7-mRNA-1	exigua_EL1	exigua_egg	1650.73	390.221	1020.48	2.08058	0.135496	15.3553	3.26639e-53	6.62499e-52
11	augustus_masked-tulip_contig_515_pilon_pilon-processed-gene-2.47-mRNA-1	exigua_EL1	exigua_egg	1.23537	5201.87	2601.55	-12.0593	0.786458	-15.3337	4.5546e-53	9.22189e-52
1	maker-tulip_contig_59_pilon_pilon-augustus-gene-0.26-mRNA-1	exigua_EL1	exigua_egg	91.7272	751.786	421.757	-3.03518	0.19799	-15.33	4.82243e-53	9.74744e-52
12	maker-tulip_contig_781_pilon_pilon-augustus-gene-2.0-mRNA-1	exigua_EL1	exigua_egg	300.362	9410.74	4855.55	-4.9693	0.324326	-15.3219	5.4564e-53	1.101e-51
3	maker-tulip_contig_424_pilon_pilon-augustus-gene-2.0-mRNA-1	exigua_EL1	exigua_egg	538.777	29.7939	284.285	4.17934	0.273149	15.3006	7.5753e-53	1.52594e-51
4	maker-tulip_contig_424_pilon_pilon-augustus-gene-2.42-mRNA-1	exigua_EL1	exigua_egg	562.106	6.48785	284.297	6.46006	0.422221	15.3002	7.62541e-53	1.53341e-51
5	maker-tulip_contig_276_pilon_pilon-augustus-gene-1.23-mRNA-1	exigua_EL1	exigua_egg	437.129	13.919	225.524	4.95845	0.324898	15.2615	1.37953e-52	2.76469e-51
1	maker-tulip_contig_710_pilon_pilon-augustus-gene-0.88-mRNA-1	exigua_EL1	exigua_egg	737.777	3.31369	370.545	7.85443	0.515138	15.2472	1.71769e-52	3.43656e-51
1	maker-tulip_contig_168_pilon_pilon-augustus-gene-0.59-mRNA-1	exigua_EL1	exigua_egg	511.639	2761.66	1636.65	-2.43238	0.159696	-15.2314	2.19003e-52	4.37413e-51
3	augustus_masked-tulip_contig_323_pilon_pilon-processed-gene-8.27-mRNA-1	exigua_EL1	exigua_egg	888.828	2.85829	445.843	8.29585	0.545028	15.221	2.56721e-52	5.11878e-51
5	maker-tulip_contig_123_pilon_pilon-augustus-gene-0.49-mRNA-1	exigua_EL1	exigua_egg	503.708	29.6175	266.663	4.09589	0.26928	15.2105	3.01227e-52	5.99605e-51
1	maker-tulip_contig_43_pilon_pilon-augustus-gene-6.43-mRNA-1	exigua_EL1	exigua_egg	28915	1762.86	15338.9	4.03607	0.265491	15.2023	3.41493e-52	6.78609e-51
1	maker-tulip_contig_159_pilon_pilon-augustus-gene-2.14-mRNA-1	exigua_EL1	exigua_egg	9.36847	358.384	183.876	-5.25039	0.34576	-15.1851	4.43884e-52	8.80593e-51
1	maker-tulip_contig_73_pilon_pilon-augustus-gene-0.28-mRNA-1	exigua_EL1	exigua_egg	96.2794	645.829	371.054	-2.74474	0.180802	-15.1809	4.73087e-52	9.36951e-51
5	maker-tulip_contig_66_pilon_pilon-augustus-gene-3.28-mRNA-1	exigua_EL1	exigua_egg	584.984	4.36014	294.672	7.10387	0.467956	15.1806	4.7521e-52	9.39577e-51
5	augustus_masked-tulip_contig_722_pilon_pilon-processed-gene-0.1-mRNA-1	exigua_EL1	exigua_egg	607.031	102.136	354.584	2.57372	0.1696	15.1752	5.15966e-52	1.01845e-50
6	maker-tulip_contig_218_pilon_pilon-augustus-gene-1.47-mRNA-1	exigua_EL1	exigua_egg	4504.36	1.40879	2252.89	11.6386	0.767717	15.16	6.5074e-52	1.28146e-50
3	maker-tulip_contig_474_pilon_pilon-augustus-gene-5.46-mRNA-1	exigua_EL1	exigua_egg	830.562	4.36761	417.465	7.51305	0.495586	15.1599	6.51385e-52	1.28146e-50
1	maker-tulip_contig_45_pilon_pilon-augustus-gene-0.56-mRNA-1	exigua_EL1	exigua_egg	169.201	1339.47	754.335	-2.9846	0.196991	-15.151	7.467e-52	1.46652e-50
1	augustus_masked-tulip_contig_281_pilon_pilon-processed-gene-1.50-mRNA-1	exigua_EL1	exigua_egg	144.128	1685.7	914.916	-3.54702	0.234169	-15.1472	7.90328e-52	1.54962e-50
1	maker-tulip_contig_361_pilon_pilon-augustus-gene-1.38-mRNA-1	exigua_EL1	exigua_egg	270.415	1461.57	865.99	-2.43401	0.160822	-15.1348	9.54991e-52	1.86937e-50
1	maker-tulip_contig_43_pilon_pilon-augustus-gene-3.9-mRNA-1	exigua_EL1	exigua_egg	131.748	653.625	392.686	-2.31035	0.152688	-15.1311	1.00949e-51	1.96951e-50
1	maker-tulip_contig_221_pilon_pilon-augustus-gene-0.37-mRNA-1	exigua_EL1	exigua_egg	194.259	911.738	552.998	-2.2309	0.147518	-15.1229	1.14324e-51	2.22016e-50
1	maker-tulip_contig_807_pilon_pilon-augustus-gene-1.35-mRNA-1	exigua_EL1	exigua_egg	288.26	2405.79	1347.03	-3.06065	0.202385	-15.1229	1.14361e-51	2.22016e-50
3	maker-tulip_contig_745_pilon_pilon-augustus-gene-2.5-mRNA-1	exigua_EL1	exigua_egg	1333.75	2.02299	667.886	9.3003	0.615412	15.1123	1.34347e-51	2.60386e-50
3	maker-tulip_contig_697_pilon_pilon-augustus-gene-0.28-mRNA-1	exigua_EL1	exigua_egg	1388.03	2.05795	695.045	9.35692	0.619319	15.1084	1.42577e-51	2.75884e-50
1	augustus_masked-tulip_contig_152_pilon_pilon-processed-gene-0.33-mRNA-1	exigua_EL1	exigua_egg	125.327	880.092	502.709	-2.8117	0.186223	-15.0986	1.65496e-51	3.19706e-50
3	maker-tulip_contig_823_pilon_pilon-augustus-gene-0.11-mRNA-1	exigua_EL1	exigua_egg	1484.43	62.6443	773.536	4.57496	0.303087	15.0945	1.75917e-51	3.39281e-50
1	maker-tulip_contig_597_pilon_pilon-augustus-gene-3.27-mRNA-1	exigua_EL1	exigua_egg	705.96	21.4906	363.726	5.05918	0.335253	15.0906	1.8662e-51	3.59334e-50
1	maker-tulip_contig_538_pilon_pilon-augustus-gene-0.62-mRNA-1	exigua_EL1	exigua_egg	549.259	3.98615	276.623	7.1401	0.473839	15.0686	2.60591e-51	5.00947e-50
6	maker-tulip_contig_112_pilon_pilon-augustus-gene-2.26-mRNA-1	exigua_EL1	exigua_egg	2166.63	1.87585	1084.26	10.2558	0.680987	15.0603	2.95654e-51	5.67425e-50
1	maker-tulip_contig_666_pilon_pilon-augustus-gene-2.21-mRNA-1	exigua_EL1	exigua_egg	603.782	4.97434	304.378	6.93041	0.460279	15.057	3.1073e-51	5.95389e-50
3	maker-tulip_contig_68_pilon_pilon-augustus-gene-0.37-mRNA-1	exigua_EL1	exigua_egg	468.533	7.60407	238.068	5.9729	0.396792	15.053	3.30085e-51	6.31448e-50
1	augustus_masked-tulip_contig_546_pilon_pilon-processed-gene-0.57-mRNA-1	exigua_EL1	exigua_egg	99.7368	929.235	514.486	-3.21964	0.214037	-15.0424	3.86994e-51	7.39114e-50
1	maker-tulip_contig_236_pilon_pilon-augustus-gene-7.58-mRNA-1	exigua_EL1	exigua_egg	772.143	104.416	438.279	2.88259	0.191664	15.0398	4.02654e-51	7.6778e-50
1	maker-tulip_contig_90_pilon_pilon-augustus-gene-0.66-mRNA-1	exigua_EL1	exigua_egg	301.669	1831.13	1066.4	-2.60119	0.173088	-15.0281	4.80396e-51	9.14538e-50
1	maker-tulip_contig_33_pilon_pilon-augustus-gene-2.6-mRNA-1	exigua_EL1	exigua_egg	168.81	877.864	523.337	-2.37796	0.158569	-14.9964	7.75443e-51	1.47147e-49
1	maker-tulip_contig_159_pilon_pilon-augustus-gene-2.31-mRNA-1	exigua_EL1	exigua_egg	443.143	5.57114	224.357	6.29595	0.420372	14.9771	1.03653e-50	1.96058e-49
1	maker-tulip_contig_604_pilon_pilon-augustus-gene-3.81-mRNA-1	exigua_EL1	exigua_egg	100.486	640.8	370.643	-2.6737	0.178581	-14.9719	1.12042e-50	2.11586e-49
5	maker-tulip_contig_870_pilon_pilon-augustus-gene-0.18-mRNA-1	exigua_EL1	exigua_egg	359.594	9.07268	184.333	5.29474	0.35371	14.9692	1.16804e-50	2.20227e-49
3	maker-tulip_contig_376_pilon_pilon-augustus-gene-0.37-mRNA-1	exigua_EL1	exigua_egg	14552.6	3252.75	8902.66	2.16176	0.144446	14.9659	1.2269e-50	2.30955e-49
1	augustus_masked-tulip_contig_523_pilon_pilon-processed-gene-0.36-mRNA-1	exigua_EL1	exigua_egg	275.435	1177.52	726.475	-2.09549	0.140027	-14.9649	1.245e-50	2.33989e-49
5	maker-tulip_contig_482_pilon_pilon-augustus-gene-2.16-mRNA-1	exigua_EL1	exigua_egg	1772	65.152	918.574	4.77257	0.31942	14.9414	1.77244e-50	3.32057e-49
8	maker-tulip_contig_827_pilon_pilon-augustus-gene-0.20-mRNA-1	exigua_EL1	exigua_egg	26.3689	699.431	362.9	-4.73336	0.316885	-14.9371	1.88924e-50	3.53378e-49
3	augustus_masked-tulip_contig_238_pilon_pilon-processed-gene-0.10-mRNA-1	exigua_EL1	exigua_egg	408.842	8.78601	208.814	5.53418	0.370519	14.9363	1.91332e-50	3.57315e-49
1	maker-tulip_contig_603_pilon_pilon-augustus-gene-1.29-mRNA-1	exigua_EL1	exigua_egg	72.2021	503.249	287.725	-2.80214	0.187623	-14.935	1.9507e-50	3.63719e-49
1	maker-tulip_contig_323_pilon_pilon-augustus-gene-3.22-mRNA-1	exigua_EL1	exigua_egg	1160.44	8.9097	584.673	7.00126	0.46906	14.9261	2.22824e-50	4.14158e-49
5	maker-tulip_contig_75_pilon_pilon-augustus-gene-1.1-mRNA-1	exigua_EL1	exigua_egg	332.589	17.6882	175.139	4.23428	0.283716	14.9244	2.28723e-50	4.24452e-49
6	maker-tulip_contig_566_pilon_pilon-augustus-gene-1.8-mRNA-1	exigua_EL1	exigua_egg	2153.48	1.80608	1077.64	10.2497	0.68715	14.9163	2.58285e-50	4.78558e-49
1	maker-tulip_contig_523_pilon_pilon-augustus-gene-0.112-mRNA-1	exigua_EL1	exigua_egg	886.732	5406.99	3146.86	-2.60815	0.174885	-14.9135	2.6934e-50	4.98259e-49
1	maker-tulip_contig_490_pilon_pilon-augustus-gene-2.39-mRNA-1	exigua_EL1	exigua_egg	819.628	100.581	460.105	3.02784	0.203093	14.9087	2.89515e-50	5.3474e-49
1	maker-tulip_contig_498_pilon_pilon-augustus-gene-0.46-mRNA-1	exigua_EL1	exigua_egg	310.6	1392.1	851.348	-2.16363	0.145168	-14.9043	3.08962e-50	5.69767e-49
5	augustus_masked-tulip_contig_454_pilon_pilon-processed-gene-2.0-mRNA-1	exigua_EL1	exigua_egg	1630.08	17.7714	823.927	6.51204	0.437618	14.8806	4.40211e-50	8.10538e-49
5	maker-tulip_contig_429_pilon_pilon-augustus-gene-2.8-mRNA-1	exigua_EL1	exigua_egg	1307.11	154.375	730.743	3.08107	0.207179	14.8715	5.04637e-50	9.27714e-49
1	augustus_masked-tulip_contig_407_pilon_pilon-processed-gene-5.19-mRNA-1	exigua_EL1	exigua_egg	1190.81	163.529	677.17	2.86562	0.192732	14.8685	5.28212e-50	9.69541e-49
1	maker-tulip_contig_281_pilon_pilon-augustus-gene-1.38-mRNA-1	exigua_EL1	exigua_egg	282.737	1189.7	736.217	-2.07335	0.139614	-14.8506	6.89732e-50	1.26013e-48
1	maker-tulip_contig_100_pilon_pilon-augustus-gene-0.6-mRNA-1	exigua_EL1	exigua_egg	502.55	3.84072	253.196	7.0162	0.472698	14.8429	7.73617e-50	1.41119e-48
1	maker-tulip_contig_336_pilon_pilon-augustus-gene-0.65-mRNA-1	exigua_EL1	exigua_egg	82.3847	688.615	385.5	-3.06228	0.20632	-14.8424	7.79221e-50	1.41922e-48
1	augustus_masked-tulip_contig_60_pilon_pilon-processed-gene-1.4-mRNA-1	exigua_EL1	exigua_egg	437.36	1943.43	1190.4	-2.15164	0.145088	-14.8299	9.38951e-50	1.7075e-48
1	maker-tulip_contig_759_pilon_pilon-augustus-gene-1.99-mRNA-1	exigua_EL1	exigua_egg	314.523	1382.47	848.495	-2.13572	0.144157	-14.8153	1.16676e-49	2.1185e-48
1	maker-tulip_contig_209_pilon_pilon-augustus-gene-2.31-mRNA-1	exigua_EL1	exigua_egg	476.208	6.22434	241.216	6.29963	0.425288	14.8126	1.21389e-49	2.20069e-48
1	maker-tulip_contig_773_pilon_pilon-augustus-gene-0.19-mRNA-1	exigua_EL1	exigua_egg	408.705	49.4178	229.061	3.0475	0.205944	14.7977	1.51587e-49	2.74393e-48
1	maker-tulip_contig_446_pilon_pilon-augustus-gene-1.30-mRNA-1	exigua_EL1	exigua_egg	1013.56	125.053	569.305	3.0146	0.203728	14.7971	1.52841e-49	2.7624e-48
3	maker-tulip_contig_674_pilon_pilon-augustus-gene-0.25-mRNA-1	exigua_EL1	exigua_egg	498.813	5.29597	252.055	6.5571	0.443239	14.7936	1.61101e-49	2.90722e-48
8	maker-tulip_contig_732_pilon_pilon-augustus-gene-3.2-mRNA-1	exigua_EL1	exigua_egg	2.44652	720.606	361.526	-8.20913	0.555624	-14.7746	2.13567e-49	3.84813e-48
5	augustus_masked-tulip_contig_671_pilon_pilon-processed-gene-0.33-mRNA-1	exigua_EL1	exigua_egg	625.979	3.20897	314.594	7.62049	0.515808	14.7739	2.15889e-49	3.88402e-48
3	maker-tulip_contig_867_pilon_pilon-augustus-gene-0.0-mRNA-1	exigua_EL1	exigua_egg	383.333	16.3494	199.841	4.55703	0.308671	14.7634	2.52183e-49	4.53007e-48
1	augustus_masked-tulip_contig_159_pilon_pilon-processed-gene-0.0-mRNA-1	exigua_EL1	exigua_egg	147.464	721.968	434.716	-2.29136	0.15525	-14.7591	2.68714e-49	4.81967e-48
1	maker-tulip_contig_718_pilon_pilon-augustus-gene-2.18-mRNA-1	exigua_EL1	exigua_egg	304.382	1223.78	764.079	-2.00729	0.1361	-14.7486	3.14062e-49	5.61594e-48
1	maker-tulip_contig_276_pilon_pilon-augustus-gene-3.9-mRNA-1	exigua_EL1	exigua_egg	376.521	1678	1027.26	-2.15578	0.146312	-14.7342	3.88966e-49	6.94481e-48
1	augustus_masked-tulip_contig_597_pilon_pilon-processed-gene-3.63-mRNA-1	exigua_EL1	exigua_egg	2506.85	309.06	1407.96	3.01825	0.204891	14.731	4.07749e-49	7.26916e-48
1	maker-tulip_contig_546_pilon_pilon-augustus-gene-0.16-mRNA-1	exigua_EL1	exigua_egg	75.8745	482.61	279.242	-2.66964	0.181419	-14.7153	5.13809e-49	9.14611e-48
4	maker-tulip_contig_446_pilon_pilon-augustus-gene-0.6-mRNA-1	exigua_EL1	exigua_egg	2221.81	1.87585	1111.84	10.2897	0.700598	14.687	7.81493e-49	1.38691e-47
1	augustus_masked-tulip_contig_827_pilon_pilon-processed-gene-2.6-mRNA-1	exigua_EL1	exigua_egg	132.879	882.41	507.645	-2.73059	0.185933	-14.6859	7.9406e-49	1.4071e-47
1	augustus_masked-tulip_contig_362_pilon_pilon-processed-gene-2.4-mRNA-1	exigua_EL1	exigua_egg	988.767	52.3001	520.534	4.24966	0.289465	14.6811	8.5217e-49	1.5078e-47
3	maker-tulip_contig_407_pilon_pilon-augustus-gene-4.30-mRNA-1	exigua_EL1	exigua_egg	795.5	18.6067	407.053	5.41396	0.369186	14.6646	1.08648e-48	1.91951e-47
1	maker-tulip_contig_344_pilon_pilon-augustus-gene-0.2-mRNA-1	exigua_EL1	exigua_egg	72.1282	490.203	281.166	-2.76409	0.188518	-14.6622	1.12517e-48	1.98488e-47
3	maker-tulip_contig_429_pilon_pilon-augustus-gene-3.54-mRNA-1	exigua_EL1	exigua_egg	4509.75	914.633	2712.19	2.30119	0.156964	14.6606	1.1529e-48	2.03076e-47
3	maker-tulip_contig_667_pilon_pilon-augustus-gene-0.145-mRNA-1	exigua_EL1	exigua_egg	638.91	43.4643	341.187	3.86858	0.263908	14.6588	1.18318e-48	2.08098e-47
3	maker-tulip_contig_654_pilon_pilon-augustus-gene-1.125-mRNA-1	exigua_EL1	exigua_egg	511.886	28.9253	270.406	4.13551	0.282147	14.6573	1.20994e-48	2.12487e-47
4	maker-tulip_contig_559_pilon_pilon-augustus-gene-2.52-mRNA-1	exigua_EL1	exigua_egg	5729.7	1.01149	2865.35	12.4015	0.846146	14.6564	1.22526e-48	2.14857e-47
1	maker-tulip_contig_351_pilon_pilon-augustus-gene-1.46-mRNA-1	exigua_EL1	exigua_egg	2690.82	475.4	1583.11	2.50085	0.170707	14.6499	1.34899e-48	2.35854e-47
3	maker-tulip_contig_208_pilon_pilon-augustus-gene-1.93-mRNA-1	exigua_EL1	exigua_egg	700.399	56.2754	378.337	3.63525	0.248192	14.6469	1.40908e-48	2.45994e-47
1	maker-tulip_contig_429_pilon_pilon-augustus-gene-0.35-mRNA-1	exigua_EL1	exigua_egg	22.544	426.315	224.429	-4.24106	0.289755	-14.6367	1.63768e-48	2.8548e-47
1	maker-tulip_contig_327_pilon_pilon-augustus-gene-9.25-mRNA-1	exigua_EL1	exigua_egg	40.7481	365.136	202.942	-3.1629	0.216371	-14.6179	2.15929e-48	3.75851e-47
1	maker-tulip_contig_327_pilon_pilon-augustus-gene-6.4-mRNA-1	exigua_EL1	exigua_egg	1103.41	5306.48	3204.94	-2.2657	0.155123	-14.6058	2.57786e-48	4.48046e-47
1	augustus_masked-tulip_contig_611_pilon_pilon-processed-gene-3.20-mRNA-1	exigua_EL1	exigua_egg	41.9864	369.287	205.637	-3.13593	0.215125	-14.5773	3.91871e-48	6.8009e-47
5	maker-tulip_contig_334_pilon_pilon-augustus-gene-4.61-mRNA-1	exigua_EL1	exigua_egg	1548.54	1.76537	775.151	9.77594	0.671142	14.5661	4.61315e-48	7.98258e-47
8	maker-tulip_contig_110_pilon_pilon-augustus-gene-0.19-mRNA-1	exigua_EL1	exigua_egg	23.9101	428.736	226.323	-4.16065	0.285858	-14.555	5.42993e-48	9.38216e-47
5	maker-tulip_contig_702_pilon_pilon-augustus-gene-0.40-mRNA-1	exigua_EL1	exigua_egg	1074.48	9.80155	542.139	6.79722	0.467081	14.5526	5.62556e-48	9.70595e-47
1	maker-tulip_contig_6_pilon_pilon-augustus-gene-0.4-mRNA-1	exigua_EL1	exigua_egg	132.68	841.656	487.168	-2.66554	0.183169	-14.5524	5.64298e-48	9.72177e-47
3	maker-tulip_contig_653_pilon_pilon-augustus-gene-0.86-mRNA-1	exigua_EL1	exigua_egg	503.946	9.28803	256.617	5.77271	0.396885	14.5451	6.27728e-48	1.0783e-46
1	maker-tulip_contig_327_pilon_pilon-augustus-gene-10.79-mRNA-1	exigua_EL1	exigua_egg	57.0809	590.503	323.792	-3.3693	0.231649	-14.5448	6.30123e-48	1.08084e-46
1	maker-tulip_contig_58_pilon_pilon-augustus-gene-5.16-mRNA-1	exigua_EL1	exigua_egg	90.6938	506.019	298.357	-2.48017	0.170568	-14.5407	6.69518e-48	1.14674e-46
1	maker-tulip_contig_605_pilon_pilon-augustus-gene-0.60-mRNA-1	exigua_EL1	exigua_egg	93.2473	731.105	412.176	-2.97204	0.204553	-14.5295	7.88409e-48	1.34842e-46
1	augustus_masked-tulip_contig_636_pilon_pilon-processed-gene-0.15-mRNA-1	exigua_EL1	exigua_egg	386.635	6.15457	196.395	6.00306	0.413471	14.5187	9.22601e-48	1.57564e-46
1	augustus_masked-tulip_contig_145_pilon_pilon-processed-gene-4.8-mRNA-1	exigua_EL1	exigua_egg	145.667	739.063	442.365	-2.34327	0.161431	-14.5156	9.6519e-48	1.64599e-46
5	maker-tulip_contig_870_pilon_pilon-augustus-gene-4.62-mRNA-1	exigua_EL1	exigua_egg	370.373	18.4131	194.393	4.33246	0.298675	14.5056	1.11665e-47	1.90153e-46
1	maker-tulip_contig_704_pilon_pilon-augustus-gene-2.62-mRNA-1	exigua_EL1	exigua_egg	563.914	64.4881	314.201	3.12704	0.21565	14.5005	1.20188e-47	2.04371e-46
1	maker-tulip_contig_616_pilon_pilon-augustus-gene-1.13-mRNA-1	exigua_EL1	exigua_egg	62.322	518.807	290.565	-3.05753	0.211135	-14.4814	1.58807e-47	2.69652e-46
1	maker-tulip_contig_361_pilon_pilon-augustus-gene-1.56-mRNA-1	exigua_EL1	exigua_egg	404.971	2157.28	1281.12	-2.41308	0.166835	-14.4639	2.04964e-47	3.47026e-46
10	maker-tulip_contig_345_pilon_pilon-augustus-gene-1.40-mRNA-1	exigua_EL1	exigua_egg	30.185	499.042	264.614	-4.04774	0.279922	-14.4603	2.16e-47	3.64662e-46
3	maker-tulip_contig_626_pilon_pilon-augustus-gene-1.33-mRNA-1	exigua_EL1	exigua_egg	520.002	3.54225	261.772	7.20153	0.498105	14.4579	2.23598e-47	3.76949e-46
1	maker-tulip_contig_407_pilon_pilon-augustus-gene-7.101-mRNA-1	exigua_EL1	exigua_egg	206.496	985.018	595.757	-2.25376	0.156071	-14.4406	2.8745e-47	4.83901e-46
5	maker-tulip_contig_375_pilon_pilon-augustus-gene-1.20-mRNA-1	exigua_EL1	exigua_egg	526.269	8.61138	267.44	5.90864	0.409176	14.4403	2.88394e-47	4.84798e-46
1	maker-tulip_contig_640_pilon_pilon-augustus-gene-2.14-mRNA-1	exigua_EL1	exigua_egg	578.714	2372.12	1475.41	-2.03502	0.140931	-14.4399	2.90382e-47	4.87445e-46
1	maker-tulip_contig_473_pilon_pilon-augustus-gene-2.15-mRNA-1	exigua_EL1	exigua_egg	350.326	23.3542	186.84	3.89509	0.269981	14.4273	3.48678e-47	5.84469e-46
1	maker-tulip_contig_455_pilon_pilon-augustus-gene-0.38-mRNA-1	exigua_EL1	exigua_egg	256.218	1527.82	892.018	-2.57643	0.178692	-14.4183	3.97115e-47	6.64717e-46
5	maker-tulip_contig_674_pilon_pilon-augustus-gene-1.39-mRNA-1	exigua_EL1	exigua_egg	787.222	2.57737	394.9	8.31124	0.577039	14.4033	4.93634e-47	8.23935e-46
8	augustus_masked-tulip_contig_392_pilon_pilon-processed-gene-0.12-mRNA-1	exigua_EL1	exigua_egg	9.11501	289.985	149.55	-4.98894	0.346682	-14.3905	5.93366e-47	9.87602e-46
1	maker-tulip_contig_704_pilon_pilon-augustus-gene-1.5-mRNA-1	exigua_EL1	exigua_egg	145.394	924.063	534.728	-2.66711	0.185532	-14.3755	7.37506e-47	1.22578e-45
1	maker-tulip_contig_333_pilon_pilon-augustus-gene-2.42-mRNA-1	exigua_EL1	exigua_egg	86.2812	664.724	375.503	-2.94487	0.204985	-14.3663	8.42722e-47	1.39868e-45
1	maker-tulip_contig_667_pilon_pilon-augustus-gene-0.139-mRNA-1	exigua_EL1	exigua_egg	145.41	941.306	543.358	-2.69484	0.187635	-14.3621	8.94599e-47	1.48269e-45
1	maker-tulip_contig_731_pilon_pilon-augustus-gene-0.41-mRNA-1	exigua_EL1	exigua_egg	88.8406	838.188	463.514	-3.23638	0.22551	-14.3514	1.04397e-46	1.7254e-45
1	augustus_masked-tulip_contig_402_pilon_pilon-processed-gene-0.16-mRNA-1	exigua_EL1	exigua_egg	74.1276	648.672	361.4	-3.13076	0.218343	-14.3387	1.25418e-46	2.06993e-45
8	maker-tulip_contig_553_pilon_pilon-augustus-gene-0.98-mRNA-1	exigua_EL1	exigua_egg	26.428	793.105	409.766	-4.90691	0.342335	-14.3336	1.34861e-46	2.22266e-45
5	maker-tulip_contig_787_pilon_pilon-augustus-gene-0.14-mRNA-1	exigua_EL1	exigua_egg	1052.54	38.579	545.56	4.75886	0.332204	14.3251	1.52529e-46	2.51034e-45
5	maker-tulip_contig_697_pilon_pilon-augustus-gene-0.16-mRNA-1	exigua_EL1	exigua_egg	581.072	16.7507	298.912	5.13935	0.358793	14.324	1.5494e-46	2.54646e-45
1	maker-tulip_contig_593_pilon_pilon-augustus-gene-1.26-mRNA-1	exigua_EL1	exigua_egg	118.741	978.987	548.864	-3.04245	0.212454	-14.3205	1.629e-46	2.67356e-45
4	augustus_masked-tulip_contig_217_pilon_pilon-processed-gene-4.45-mRNA-1	exigua_EL1	exigua_egg	544.585	3.02283	273.804	7.4255	0.519748	14.2867	2.64752e-46	4.33311e-45
1	maker-tulip_contig_691_pilon_pilon-augustus-gene-0.6-mRNA-1	exigua_EL1	exigua_egg	24.6279	340.107	182.367	-3.78587	0.265003	-14.2862	2.66913e-46	4.36241e-45
1	augustus_masked-tulip_contig_333_pilon_pilon-processed-gene-3.35-mRNA-1	exigua_EL1	exigua_egg	86.8086	788.791	437.8	-3.18542	0.223328	-14.2634	3.69979e-46	6.03855e-45
1	maker-tulip_contig_236_pilon_pilon-augustus-gene-0.45-mRNA-1	exigua_EL1	exigua_egg	235.892	1593.23	914.559	-2.75532	0.193197	-14.2618	3.78733e-46	6.17287e-45
5	maker-tulip_contig_870_pilon_pilon-augustus-gene-1.62-mRNA-1	exigua_EL1	exigua_egg	429.91	34.9425	232.426	3.62789	0.254404	14.2603	3.86732e-46	6.29454e-45
1	augustus_masked-tulip_contig_290_pilon_pilon-processed-gene-5.70-mRNA-1	exigua_EL1	exigua_egg	51.4287	375.765	213.597	-2.86861	0.201332	-14.2482	4.60275e-46	7.48121e-45
1	maker-tulip_contig_560_pilon_pilon-augustus-gene-2.34-mRNA-1	exigua_EL1	exigua_egg	156.387	846.141	501.264	-2.43491	0.170921	-14.2459	4.75592e-46	7.71953e-45
1	maker-tulip_contig_185_pilon_pilon-augustus-gene-0.20-mRNA-1	exigua_EL1	exigua_egg	1957.99	83.6622	1020.82	4.55449	0.319953	14.2349	5.56464e-46	9.00737e-45
1	maker-tulip_contig_881_pilon_pilon-augustus-gene-1.49-mRNA-1	exigua_EL1	exigua_egg	34.6669	340.426	187.546	-3.29479	0.23147	-14.2342	5.6176e-46	9.08063e-45
6	maker-tulip_contig_407_pilon_pilon-augustus-gene-2.10-mRNA-1	exigua_EL1	exigua_egg	1025.33	3.07519	514.204	8.34226	0.58659	14.2216	6.72912e-46	1.08033e-44
1	maker-tulip_contig_407_pilon_pilon-augustus-gene-3.12-mRNA-1	exigua_EL1	exigua_egg	112.407	581.035	346.721	-2.37039	0.166693	-14.2201	6.87999e-46	1.10305e-44
8	augustus_masked-tulip_contig_248_pilon_pilon-processed-gene-0.2-mRNA-1	exigua_EL1	exigua_egg	4.85115	349.279	177.065	-6.16469	0.433591	-14.2178	7.10805e-46	1.13806e-44
3	augustus_masked-tulip_contig_331_pilon_pilon-processed-gene-2.29-mRNA-1	exigua_EL1	exigua_egg	515.375	3.35611	259.366	7.19594	0.506669	14.2025	8.84576e-46	1.41436e-44
2	augustus_masked-tulip_contig_211_pilon_pilon-processed-gene-1.6-mRNA-1	exigua_EL1	exigua_egg	3.07279	693.239	348.156	-7.82926	0.551353	-14.2001	9.15032e-46	1.46108e-44
1	augustus_masked-tulip_contig_195_pilon_pilon-processed-gene-0.12-mRNA-1	exigua_EL1	exigua_egg	204.117	917.31	560.713	-2.1686	0.152723	-14.1995	9.22382e-46	1.47082e-44
1	maker-tulip_contig_387_pilon_pilon-augustus-gene-1.94-mRNA-1	exigua_EL1	exigua_egg	9903	1261.48	5582.24	2.97308	0.209474	14.1931	1.01127e-45	1.60821e-44
5	maker-tulip_contig_474_pilon_pilon-augustus-gene-1.16-mRNA-1	exigua_EL1	exigua_egg	4592.22	1.35643	2296.79	11.6733	0.822637	14.1901	1.05454e-45	1.6725e-44
3	maker-tulip_contig_281_pilon_pilon-augustus-gene-1.36-mRNA-1	exigua_EL1	exigua_egg	407.765	8.5225	208.144	5.58584	0.393682	14.1887	1.07586e-45	1.70403e-44
1	maker-tulip_contig_619_pilon_pilon-augustus-gene-1.4-mRNA-1	exigua_EL1	exigua_egg	846.718	202.532	524.625	2.06473	0.145584	14.1824	1.17723e-45	1.86208e-44
3	maker-tulip_contig_22_pilon_pilon-augustus-gene-1.58-mRNA-1	exigua_EL1	exigua_egg	693.05	74.9845	384.017	3.20204	0.225832	14.1789	1.23856e-45	1.95647e-44
5	maker-tulip_contig_37_pilon_pilon-augustus-gene-2.35-mRNA-1	exigua_EL1	exigua_egg	343.075	7.2492	175.162	5.53774	0.39065	14.1757	1.2949e-45	2.04272e-44
1	maker-tulip_contig_586_pilon_pilon-augustus-gene-3.15-mRNA-1	exigua_EL1	exigua_egg	616.658	3.00372	309.831	7.76323	0.54841	14.1559	1.7173e-45	2.70544e-44
1	maker-tulip_contig_451_pilon_pilon-augustus-gene-1.26-mRNA-1	exigua_EL1	exigua_egg	877.49	195.826	536.658	2.16494	0.15294	14.1554	1.7285e-45	2.71944e-44
1	augustus_masked-tulip_contig_566_pilon_pilon-processed-gene-2.32-mRNA-1	exigua_EL1	exigua_egg	554.069	3.04614	278.558	7.45034	0.526371	14.1542	1.76043e-45	2.76599e-44
1	maker-tulip_contig_68_pilon_pilon-augustus-gene-0.2-mRNA-1	exigua_EL1	exigua_egg	101.413	625.968	363.691	-2.62573	0.185572	-14.1494	1.88357e-45	2.95552e-44
1	maker-tulip_contig_236_pilon_pilon-augustus-gene-4.93-mRNA-1	exigua_EL1	exigua_egg	37.1411	519.31	278.226	-3.80514	0.26918	-14.136	2.27817e-45	3.56994e-44
1	maker-tulip_contig_623_pilon_pilon-augustus-gene-5.129-mRNA-1	exigua_EL1	exigua_egg	72.6911	787.115	429.903	-3.43848	0.243252	-14.1355	2.29613e-45	3.59331e-44
3	maker-tulip_contig_441_pilon_pilon-augustus-gene-4.58-mRNA-1	exigua_EL1	exigua_egg	1035.77	65.5747	550.674	3.9808	0.281861	14.1233	2.73036e-45	4.26719e-44
3	maker-tulip_contig_527_pilon_pilon-augustus-gene-1.14-mRNA-1	exigua_EL1	exigua_egg	578.931	28.4642	303.697	4.33478	0.306938	14.1226	2.75436e-45	4.299e-44
1	augustus_masked-tulip_contig_44_pilon_pilon-processed-gene-6.18-mRNA-1	exigua_EL1	exigua_egg	99.4503	818.498	458.974	-3.03976	0.215386	-14.1131	3.15505e-45	4.91788e-44
5	augustus_masked-tulip_contig_818_pilon_pilon-processed-gene-0.7-mRNA-1	exigua_EL1	exigua_egg	850.153	144.36	497.257	2.55771	0.181271	14.1099	3.30199e-45	5.14011e-44
5	augustus_masked-tulip_contig_407_pilon_pilon-processed-gene-3.74-mRNA-1	exigua_EL1	exigua_egg	507.068	3.57721	255.323	7.16352	0.507701	14.1097	3.30816e-45	5.14293e-44
3	augustus_masked-tulip_contig_169_pilon_pilon-processed-gene-0.3-mRNA-1	exigua_EL1	exigua_egg	1676.87	158.921	917.897	3.39926	0.241247	14.0904	4.35254e-45	6.75762e-44
1	augustus_masked-tulip_contig_515_pilon_pilon-processed-gene-3.61-mRNA-1	exigua_EL1	exigua_egg	239.953	1063.05	651.503	-2.14689	0.152453	-14.0823	4.87985e-45	7.56634e-44
1	maker-tulip_contig_651_pilon_pilon-augustus-gene-0.27-mRNA-1	exigua_EL1	exigua_egg	594.904	67.9781	331.441	3.12771	0.22228	14.071	5.72288e-45	8.86182e-44
-	augustus_masked-tulip_contig_43_pilon_pilon-processed-gene-4.6-mRNA-1	exigua_EL1	exigua_egg	532.183	8.79767	270.49	5.91504	0.420523	14.0659	6.15273e-45	9.49781e-44
1	maker-tulip_contig_280_pilon_pilon-augustus-gene-0.15-mRNA-1	exigua_EL1	exigua_egg	31.9096	349.04	190.475	-3.44934	0.245228	-14.0659	6.15778e-45	9.49781e-44
1	maker-tulip_contig_559_pilon_pilon-augustus-gene-2.58-mRNA-1	exigua_EL1	exigua_egg	225.367	1007.67	616.518	-2.16027	0.153585	-14.0657	6.17483e-45	9.51166e-44
1	augustus_masked-tulip_contig_498_pilon_pilon-processed-gene-0.93-mRNA-1	exigua_EL1	exigua_egg	71.5847	456.735	264.16	-2.67455	0.190154	-14.0652	6.2171e-45	9.56428e-44
1	maker-tulip_contig_55_pilon_pilon-augustus-gene-0.75-mRNA-1	exigua_EL1	exigua_egg	111.295	754.873	433.084	-2.76228	0.196439	-14.0618	6.52282e-45	1.00128e-43
1	maker-tulip_contig_515_pilon_pilon-augustus-gene-3.28-mRNA-1	exigua_EL1	exigua_egg	374.254	22.9783	198.616	4.02657	0.286349	14.0617	6.52567e-45	1.00128e-43
5	maker-tulip_contig_212_pilon_pilon-augustus-gene-1.104-mRNA-1	exigua_EL1	exigua_egg	384.845	41.8294	213.337	3.20457	0.227955	14.0579	6.89002e-45	1.05581e-43
1	maker-tulip_contig_252_pilon_pilon-augustus-gene-0.28-mRNA-1	exigua_EL1	exigua_egg	3072.28	238.444	1655.36	3.68756	0.26238	14.0543	7.25312e-45	1.11001e-43
1	maker-tulip_contig_523_pilon_pilon-augustus-gene-0.65-mRNA-1	exigua_EL1	exigua_egg	564.357	2486.75	1525.55	-2.13946	0.152324	-14.0454	8.21509e-45	1.2556e-43
1	augustus_masked-tulip_contig_318_pilon_pilon-processed-gene-2.29-mRNA-1	exigua_EL1	exigua_egg	36.8764	340.166	188.521	-3.20595	0.228426	-14.035	9.52322e-45	1.45365e-43
1	maker-tulip_contig_33_pilon_pilon-augustus-gene-1.53-mRNA-1	exigua_EL1	exigua_egg	91.5258	830.471	460.998	-3.18028	0.226691	-14.0292	1.03369e-44	1.5758e-43
5	augustus_masked-tulip_contig_473_pilon_pilon-processed-gene-0.26-mRNA-1	exigua_EL1	exigua_egg	9064.26	1.0522	4532.66	13.0635	0.931561	14.0233	1.12309e-44	1.70988e-43
1	augustus_masked-tulip_contig_264_pilon_pilon-processed-gene-0.28-mRNA-1	exigua_EL1	exigua_egg	700.852	2.49595	351.674	8.14582	0.581058	14.0189	1.19376e-44	1.81513e-43
1	augustus_masked-tulip_contig_362_pilon_pilon-processed-gene-5.39-mRNA-1	exigua_EL1	exigua_egg	373.372	19.5192	196.446	4.24636	0.303155	14.0072	1.40853e-44	2.13893e-43
1	maker-tulip_contig_597_pilon_pilon-augustus-gene-0.14-mRNA-1	exigua_EL1	exigua_egg	1123.24	196.205	659.723	2.51469	0.179585	14.0028	1.49915e-44	2.27362e-43
1	maker-tulip_contig_581_pilon_pilon-augustus-gene-0.6-mRNA-1	exigua_EL1	exigua_egg	1115.7	25.318	570.51	5.47965	0.391362	14.0015	1.52619e-44	2.31165e-43
1	augustus_masked-tulip_contig_270_pilon_pilon-processed-gene-3.179-mRNA-1	exigua_EL1	exigua_egg	115.196	715.336	415.266	-2.63428	0.188167	-13.9997	1.56485e-44	2.36716e-43
1	maker-tulip_contig_831_pilon_pilon-augustus-gene-0.52-mRNA-1	exigua_EL1	exigua_egg	832.941	2.01134	417.476	8.62157	0.616566	13.9832	1.97366e-44	2.97793e-43
1	augustus_masked-tulip_contig_515_pilon_pilon-processed-gene-2.45-mRNA-1	exigua_EL1	exigua_egg	378.48	5.71082	192.096	6.06236	0.434244	13.9607	2.70692e-44	4.07907e-43
1	maker-tulip_contig_774_pilon_pilon-augustus-gene-0.71-mRNA-1	exigua_EL1	exigua_egg	156.474	757.882	457.178	-2.27518	0.162977	-13.9601	2.73016e-44	4.10884e-43
5	augustus_masked-tulip_contig_505_pilon_pilon-processed-gene-3.9-mRNA-1	exigua_EL1	exigua_egg	670.571	6.13873	338.355	6.73699	0.482596	13.9599	2.73798e-44	4.11536e-43
5	maker-tulip_contig_503_pilon_pilon-augustus-gene-0.10-mRNA-1	exigua_EL1	exigua_egg	1138.83	224.306	681.569	2.34447	0.168033	13.9524	3.04271e-44	4.56755e-43
5	maker-tulip_contig_474_pilon_pilon-augustus-gene-6.14-mRNA-1	exigua_EL1	exigua_egg	492.349	42.5833	267.466	3.53401	0.253345	13.9494	3.17254e-44	4.75638e-43
1	maker-tulip_contig_715_pilon_pilon-augustus-gene-0.12-mRNA-1	exigua_EL1	exigua_egg	409.017	1656.91	1032.96	-2.01837	0.144714	-13.9473	3.26667e-44	4.89128e-43
5	maker-tulip_contig_278_pilon_pilon-augustus-gene-0.30-mRNA-1	exigua_EL1	exigua_egg	428.377	9.13499	218.756	5.58487	0.400797	13.9344	3.91487e-44	5.85443e-43
3	maker-tulip_contig_654_pilon_pilon-augustus-gene-1.110-mRNA-1	exigua_EL1	exigua_egg	535.585	2.77687	269.181	7.56767	0.5431	13.9342	3.92574e-44	5.86324e-43
1	maker-tulip_contig_807_pilon_pilon-augustus-gene-1.1-mRNA-1	exigua_EL1	exigua_egg	114.204	751.117	432.661	-2.71719	0.195056	-13.9303	4.14644e-44	6.18502e-43
1	maker-tulip_contig_111_pilon_pilon-augustus-gene-0.47-mRNA-1	exigua_EL1	exigua_egg	439.034	4.78821	221.911	6.47992	0.465214	13.9289	4.22841e-44	6.29931e-43
8	maker-tulip_contig_272_pilon_pilon-augustus-gene-5.91-mRNA-1	exigua_EL1	exigua_egg	11.6531	337.783	174.718	-4.86369	0.349187	-13.9286	4.24482e-44	6.31577e-43
1	maker-tulip_contig_145_pilon_pilon-augustus-gene-5.25-mRNA-1	exigua_EL1	exigua_egg	6.30632	393.417	199.862	-5.94915	0.427576	-13.9137	5.23284e-44	7.76621e-43
3	maker-tulip_contig_305_pilon_pilon-augustus-gene-0.9-mRNA-1	exigua_EL1	exigua_egg	756.741	44.6153	400.678	4.07795	0.293301	13.9036	6.01922e-44	8.92208e-43
3	augustus_masked-tulip_contig_645_pilon_pilon-processed-gene-0.38-mRNA-1	exigua_EL1	exigua_egg	366.897	7.64059	187.269	5.56703	0.400664	13.8945	6.83875e-44	1.01114e-42
3	maker-tulip_contig_408_pilon_pilon-augustus-gene-0.26-mRNA-1	exigua_EL1	exigua_egg	1884.8	1.54257	943.171	10.3769	0.746994	13.8916	7.12642e-44	1.05235e-42
1	maker-tulip_contig_44_pilon_pilon-augustus-gene-7.46-mRNA-1	exigua_EL1	exigua_egg	11992.3	1852.35	6922.34	2.69498	0.194025	13.8899	7.29803e-44	1.07634e-42
1	maker-tulip_contig_307_pilon_pilon-augustus-gene-1.66-mRNA-1	exigua_EL1	exigua_egg	585.178	2620.22	1602.7	-2.1627	0.155795	-13.8818	8.17013e-44	1.20346e-42
1	augustus_masked-tulip_contig_636_pilon_pilon-processed-gene-0.2-mRNA-1	exigua_EL1	exigua_egg	206.401	1148.01	677.205	-2.47568	0.178404	-13.8768	8.75639e-44	1.28821e-42
5	augustus_masked-tulip_contig_407_pilon_pilon-processed-gene-5.13-mRNA-1	exigua_EL1	exigua_egg	322.962	4.92198	163.942	6.02989	0.434688	13.8718	9.39447e-44	1.38036e-42
1	maker-tulip_contig_407_pilon_pilon-augustus-gene-4.20-mRNA-1	exigua_EL1	exigua_egg	177.963	1383.66	780.812	-2.95889	0.213614	-13.8516	1.24448e-43	1.82401e-42
3	maker-tulip_contig_603_pilon_pilon-augustus-gene-2.14-mRNA-1	exigua_EL1	exigua_egg	8118.26	450.965	4284.61	4.17079	0.301165	13.8488	1.29279e-43	1.89245e-42
1	maker-tulip_contig_236_pilon_pilon-augustus-gene-8.0-mRNA-1	exigua_EL1	exigua_egg	38.9189	379.838	209.379	-3.28667	0.237329	-13.8486	1.298e-43	1.89773e-42
1	maker-tulip_contig_455_pilon_pilon-augustus-gene-0.21-mRNA-1	exigua_EL1	exigua_egg	187.469	852.297	519.883	-2.18557	0.157846	-13.8462	1.34062e-43	1.95761e-42
1	maker-tulip_contig_247_pilon_pilon-augustus-gene-2.103-mRNA-1	exigua_EL1	exigua_egg	3521.45	840.579	2181.02	2.06602	0.149217	13.8458	1.34909e-43	1.96753e-42
1	maker-tulip_contig_81_pilon_pilon-augustus-gene-5.8-mRNA-1	exigua_EL1	exigua_egg	205.832	1432.19	819.011	-2.79808	0.202146	-13.8419	1.42402e-43	2.07168e-42
1	maker-tulip_contig_194_pilon_pilon-augustus-gene-1.5-mRNA-1	exigua_EL1	exigua_egg	40.438	475.097	257.767	-3.55321	0.256852	-13.8337	1.59576e-43	2.31581e-42
5	maker-tulip_contig_508_pilon_pilon-augustus-gene-1.9-mRNA-1	exigua_EL1	exigua_egg	2865.66	481.177	1673.42	2.57537	0.186277	13.8254	1.79017e-43	2.59476e-42
5	maker-tulip_contig_52_pilon_pilon-augustus-gene-0.0-mRNA-1	exigua_EL1	exigua_egg	1060.71	213.309	637.01	2.31331	0.16746	13.8141	2.09669e-43	3.03531e-42
1	maker-tulip_contig_185_pilon_pilon-augustus-gene-0.24-mRNA-1	exigua_EL1	exigua_egg	108.584	586.607	347.596	-2.43343	0.176158	-13.8139	2.10201e-43	3.03927e-42
1	maker-tulip_contig_372_pilon_pilon-augustus-gene-1.7-mRNA-1	exigua_EL1	exigua_egg	511.213	2280.57	1395.89	-2.15762	0.156303	-13.8041	2.40828e-43	3.47784e-42
5	maker-tulip_contig_320_pilon_pilon-augustus-gene-3.15-mRNA-1	exigua_EL1	exigua_egg	408.967	35.2022	222.085	3.53548	0.256132	13.8034	2.43175e-43	3.50744e-42
1	maker-tulip_contig_468_pilon_pilon-augustus-gene-3.16-mRNA-1	exigua_EL1	exigua_egg	5171.52	592.01	2881.77	3.1278	0.226672	13.7988	2.59003e-43	3.73116e-42
3	augustus_masked-tulip_contig_597_pilon_pilon-processed-gene-1.18-mRNA-1	exigua_EL1	exigua_egg	714.297	3.736	359.016	7.5338	0.546122	13.7951	2.72795e-43	3.92505e-42
1	augustus_masked-tulip_contig_485_pilon_pilon-processed-gene-0.26-mRNA-1	exigua_EL1	exigua_egg	33.8327	334.171	184.002	-3.30553	0.239632	-13.7942	2.76188e-43	3.96902e-42
1	augustus_masked-tulip_contig_807_pilon_pilon-processed-gene-0.9-mRNA-1	exigua_EL1	exigua_egg	549.626	4.5654	277.096	6.90491	0.500843	13.7866	3.07015e-43	4.40665e-42
3	augustus_masked-tulip_contig_732_pilon_pilon-processed-gene-3.31-mRNA-1	exigua_EL1	exigua_egg	781.771	2.087	391.929	8.52793	0.619258	13.7712	3.79786e-43	5.44452e-42
1	maker-tulip_contig_247_pilon_pilon-augustus-gene-2.34-mRNA-1	exigua_EL1	exigua_egg	366.174	1517.4	941.788	-2.05074	0.148939	-13.769	3.91707e-43	5.6086e-42
1	maker-tulip_contig_351_pilon_pilon-augustus-gene-1.6-mRNA-1	exigua_EL1	exigua_egg	263.557	1125.48	694.519	-2.09421	0.152195	-13.76	4.43252e-43	6.33126e-42
1	maker-tulip_contig_198_pilon_pilon-augustus-gene-2.11-mRNA-1	exigua_EL1	exigua_egg	102.877	581.491	342.184	-2.49893	0.18166	-13.7561	4.68222e-43	6.67982e-42
3	maker-tulip_contig_316_pilon_pilon-augustus-gene-3.56-mRNA-1	exigua_EL1	exigua_egg	270.204	7.73956	138.972	5.12078	0.372443	13.7492	5.15149e-43	7.3404e-42
1	maker-tulip_contig_862_pilon_pilon-augustus-gene-1.66-mRNA-1	exigua_EL1	exigua_egg	143.396	927.59	535.493	-2.69342	0.196042	-13.739	5.92726e-43	8.4356e-42
1	augustus_masked-tulip_contig_126_pilon_pilon-processed-gene-2.261-mRNA-1	exigua_EL1	exigua_egg	77.5182	871.97	474.744	-3.49081	0.254141	-13.7357	6.20677e-43	8.82274e-42
1	maker-tulip_contig_429_pilon_pilon-augustus-gene-3.31-mRNA-1	exigua_EL1	exigua_egg	2016.44	8426.04	5221.24	-2.06299	0.150244	-13.7309	6.62688e-43	9.40857e-42
5	maker-tulip_contig_669_pilon_pilon-augustus-gene-2.90-mRNA-1	exigua_EL1	exigua_egg	548.176	8.49919	278.338	6.01371	0.438137	13.7256	7.12984e-43	1.01105e-41
12	maker-tulip_contig_422_pilon_pilon-augustus-gene-0.13-mRNA-1	exigua_EL1	exigua_egg	1.51957	855.167	428.343	-9.13439	0.665546	-13.7246	7.22809e-43	1.02375e-41
1	maker-tulip_contig_482_pilon_pilon-augustus-gene-1.30-mRNA-1	exigua_EL1	exigua_egg	625.118	75.9351	350.526	3.0457	0.222151	13.7101	8.83708e-43	1.24714e-41
1	augustus_masked-tulip_contig_351_pilon_pilon-processed-gene-1.90-mRNA-1	exigua_EL1	exigua_egg	136.656	856.502	496.579	-2.64762	0.193145	-13.7079	9.10087e-43	1.28283e-41
12	maker-tulip_contig_44_pilon_pilon-augustus-gene-5.0-mRNA-1	exigua_EL1	exigua_egg	53.8699	420.661	237.265	-2.965	0.216391	-13.702	9.87225e-43	1.3899e-41
1	maker-tulip_contig_606_pilon_pilon-augustus-gene-0.1-mRNA-1	exigua_EL1	exigua_egg	128.44	921.217	524.828	-2.84244	0.207456	-13.7014	9.95244e-43	1.39952e-41
1	augustus_masked-tulip_contig_547_pilon_pilon-processed-gene-5.5-mRNA-1	exigua_EL1	exigua_egg	290.717	1479.24	884.977	-2.34655	0.171333	-13.6959	1.07422e-42	1.50877e-41
5	maker-tulip_contig_192_pilon_pilon-augustus-gene-1.186-mRNA-1	exigua_EL1	exigua_egg	15359	0	7679.52	16.263	1.18778	13.6919	1.13426e-42	1.59121e-41
1	maker-tulip_contig_324_pilon_pilon-augustus-gene-0.9-mRNA-1	exigua_EL1	exigua_egg	4001.4	591.55	2296.48	2.75868	0.201607	13.6835	1.27454e-42	1.78587e-41
1	maker-tulip_contig_697_pilon_pilon-augustus-gene-1.22-mRNA-1	exigua_EL1	exigua_egg	371.883	27.515	199.699	3.7554	0.274551	13.6783	1.36812e-42	1.91245e-41
5	maker-tulip_contig_506_pilon_pilon-augustus-gene-1.146-mRNA-1	exigua_EL1	exigua_egg	313.879	26.1933	170.036	3.58446	0.262961	13.6311	2.61445e-42	3.646e-41
3	augustus_masked-tulip_contig_916_pilon_pilon-processed-gene-2.204-mRNA-1	exigua_EL1	exigua_egg	346.949	11.3343	179.142	4.93841	0.362324	13.6298	2.66261e-42	3.70877e-41
1	maker-tulip_contig_627_pilon_pilon-augustus-gene-0.29-mRNA-1	exigua_EL1	exigua_egg	1124.25	116.831	620.539	3.27064	0.240046	13.625	2.84232e-42	3.94975e-41
11	maker-tulip_contig_329_pilon_pilon-augustus-gene-0.15-mRNA-1	exigua_EL1	exigua_egg	157.906	1115.92	636.912	-2.82147	0.207112	-13.6229	2.92781e-42	4.06376e-41
1	maker-tulip_contig_80_pilon_pilon-augustus-gene-0.109-mRNA-1	exigua_EL1	exigua_egg	287.032	6.80948	146.921	5.41469	0.398098	13.6014	3.92894e-42	5.4469e-41
1	maker-tulip_contig_604_pilon_pilon-augustus-gene-2.4-mRNA-1	exigua_EL1	exigua_egg	9.72531	254.667	132.196	-4.7089	0.346475	-13.5909	4.53591e-42	6.28098e-41
1	maker-tulip_contig_468_pilon_pilon-augustus-gene-3.51-mRNA-1	exigua_EL1	exigua_egg	527.029	2116.85	1321.94	-2.00566	0.147586	-13.5898	4.60414e-42	6.36797e-41
1	augustus_masked-tulip_contig_691_pilon_pilon-processed-gene-3.25-mRNA-1	exigua_EL1	exigua_egg	460.393	16.9536	238.674	4.74692	0.349354	13.5877	4.73597e-42	6.54264e-41
1	maker-tulip_contig_468_pilon_pilon-augustus-gene-2.7-mRNA-1	exigua_EL1	exigua_egg	193.64	971.523	582.581	-2.32724	0.171454	-13.5736	5.74694e-42	7.92997e-41
3	augustus_masked-tulip_contig_619_pilon_pilon-processed-gene-1.40-mRNA-1	exigua_EL1	exigua_egg	1535.73	1.50186	768.617	10.0833	0.742901	13.5729	5.7997e-42	7.99341e-41
1	maker-tulip_contig_40_pilon_pilon-augustus-gene-0.27-mRNA-1	exigua_EL1	exigua_egg	917.178	3928.35	2422.77	-2.09842	0.154885	-13.5482	8.11503e-42	1.11584e-40
1	maker-tulip_contig_234_pilon_pilon-augustus-gene-1.31-mRNA-1	exigua_EL1	exigua_egg	329.281	1755.85	1042.56	-2.41442	0.178278	-13.543	8.7138e-42	1.19678e-40
12	maker-tulip_contig_2_pilon_pilon-augustus-gene-2.43-mRNA-1	exigua_EL1	exigua_egg	82.9474	6132.27	3107.61	-6.20899	0.458637	-13.5379	9.34111e-42	1.28144e-40
1	maker-tulip_contig_143_pilon_pilon-augustus-gene-2.24-mRNA-1	exigua_EL1	exigua_egg	1205.1	295.541	750.318	2.02798	0.149839	13.5344	9.79931e-42	1.34273e-40
1	augustus_masked-tulip_contig_216_pilon_pilon-processed-gene-0.97-mRNA-1	exigua_EL1	exigua_egg	1756.55	101.933	929.242	4.10453	0.303378	13.5294	1.04855e-41	1.4351e-40
1	maker-tulip_contig_58_pilon_pilon-augustus-gene-4.59-mRNA-1	exigua_EL1	exigua_egg	677.979	2.04629	340.013	8.32336	0.615452	13.524	1.12908e-41	1.54351e-40
1	augustus_masked-tulip_contig_37_pilon_pilon-processed-gene-2.5-mRNA-1	exigua_EL1	exigua_egg	297.287	2595.46	1446.37	-3.12593	0.231237	-13.5183	1.21946e-41	1.66513e-40
1	augustus_masked-tulip_contig_74_pilon_pilon-processed-gene-0.62-mRNA-1	exigua_EL1	exigua_egg	475.433	2108.14	1291.79	-2.14852	0.158948	-13.5172	1.23864e-41	1.68937e-40
1	maker-tulip_contig_661_pilon_pilon-augustus-gene-0.69-mRNA-1	exigua_EL1	exigua_egg	278.186	1622.38	950.283	-2.54336	0.188221	-13.5126	1.31729e-41	1.79456e-40
5	maker-tulip_contig_168_pilon_pilon-augustus-gene-0.81-mRNA-1	exigua_EL1	exigua_egg	2332.08	290.179	1311.13	3.00799	0.222622	13.5116	1.33514e-41	1.81677e-40
1	maker-tulip_contig_843_pilon_pilon-augustus-gene-4.9-mRNA-1	exigua_EL1	exigua_egg	236.661	1097.31	666.985	-2.21342	0.163843	-13.5094	1.37608e-41	1.87032e-40
3	augustus_masked-tulip_contig_498_pilon_pilon-processed-gene-0.102-mRNA-1	exigua_EL1	exigua_egg	518.259	30.8574	274.558	4.0726	0.301785	13.4951	1.67208e-41	2.27002e-40
5	augustus_masked-tulip_contig_800_pilon_pilon-processed-gene-1.10-mRNA-1	exigua_EL1	exigua_egg	1724.41	1.4495	862.93	10.2512	0.759689	13.4939	1.69758e-41	2.29935e-40
5	maker-tulip_contig_234_pilon_pilon-augustus-gene-2.23-mRNA-1	exigua_EL1	exigua_egg	360.676	4.81555	182.746	6.28532	0.465818	13.4931	1.71751e-41	2.32366e-40
5	maker-tulip_contig_43_pilon_pilon-augustus-gene-2.16-mRNA-1	exigua_EL1	exigua_egg	480.277	44.6272	262.452	3.41971	0.253493	13.4903	1.78353e-41	2.40745e-40
1	maker-tulip_contig_133_pilon_pilon-augustus-gene-1.34-mRNA-1	exigua_EL1	exigua_egg	344.588	5.05747	174.823	6.03427	0.447441	13.4862	1.88587e-41	2.54268e-40
5	augustus_masked-tulip_contig_326_pilon_pilon-processed-gene-0.70-mRNA-1	exigua_EL1	exigua_egg	1588.79	1.54257	795.166	10.1293	0.753347	13.4458	3.25954e-41	4.38475e-40
1	maker-tulip_contig_216_pilon_pilon-augustus-gene-0.48-mRNA-1	exigua_EL1	exigua_egg	147.237	778.675	462.956	-2.40306	0.178777	-13.4417	3.44583e-41	4.63007e-40
5	augustus_masked-tulip_contig_228_pilon_pilon-processed-gene-1.11-mRNA-1	exigua_EL1	exigua_egg	1274.73	198.684	736.706	2.68409	0.199724	13.439	3.57378e-41	4.79652e-40
5	maker-tulip_contig_666_pilon_pilon-augustus-gene-0.15-mRNA-1	exigua_EL1	exigua_egg	294.98	12.4154	153.698	4.57476	0.340425	13.4384	3.60185e-41	4.8287e-40
1	maker-tulip_contig_603_pilon_pilon-augustus-gene-2.22-mRNA-1	exigua_EL1	exigua_egg	49.1274	455.064	252.095	-3.20951	0.239062	-13.4254	4.29267e-41	5.74827e-40
8	maker-tulip_contig_231_pilon_pilon-augustus-gene-0.6-mRNA-1	exigua_EL1	exigua_egg	10.6293	259.01	134.819	-4.60438	0.343037	-13.4224	4.47131e-41	5.98069e-40
3	augustus_masked-tulip_contig_529_pilon_pilon-processed-gene-1.56-mRNA-1	exigua_EL1	exigua_egg	633.304	20.5674	326.936	4.92581	0.367102	13.4181	4.73682e-41	6.32865e-40
1	maker-tulip_contig_526_pilon_pilon-augustus-gene-0.11-mRNA-1	exigua_EL1	exigua_egg	10.8721	319.274	165.073	-4.86952	0.362911	-13.418	4.74618e-41	6.33397e-40
1	maker-tulip_contig_237_pilon_pilon-augustus-gene-0.35-mRNA-1	exigua_EL1	exigua_egg	11.5438	338.066	174.805	-4.86956	0.36297	-13.4159	4.88087e-41	6.50636e-40
12	maker-tulip_contig_200_pilon_pilon-augustus-gene-0.10-mRNA-1	exigua_EL1	exigua_egg	4.24377	437.504	220.874	-6.68295	0.498422	-13.4082	5.4113e-41	7.19716e-40
4	maker-tulip_contig_360_pilon_pilon-augustus-gene-0.38-mRNA-1	exigua_EL1	exigua_egg	705.451	2.18007	353.816	8.37648	0.624757	13.4076	5.45987e-41	7.25356e-40
1	maker-tulip_contig_767_pilon_pilon-augustus-gene-0.32-mRNA-1	exigua_EL1	exigua_egg	3553.52	761.472	2157.5	2.22232	0.165836	13.4007	5.99004e-41	7.94894e-40
1	maker-tulip_contig_334_pilon_pilon-augustus-gene-0.55-mRNA-1	exigua_EL1	exigua_egg	160.884	1169.03	664.956	-2.8607	0.213547	-13.3961	6.37083e-41	8.44476e-40
1	augustus_masked-tulip_contig_168_pilon_pilon-processed-gene-0.112-mRNA-1	exigua_EL1	exigua_egg	30.9991	314.203	172.601	-3.34009	0.249433	-13.3907	6.85057e-41	9.06029e-40
1	maker-tulip_contig_704_pilon_pilon-augustus-gene-2.46-mRNA-1	exigua_EL1	exigua_egg	657.497	2.26149	329.879	8.27276	0.617922	13.388	7.10514e-41	9.38644e-40
5	maker-tulip_contig_126_pilon_pilon-augustus-gene-2.30-mRNA-1	exigua_EL1	exigua_egg	304.696	17.6183	161.157	4.11012	0.307278	13.3759	8.36201e-41	1.10345e-39
3	maker-tulip_contig_434_pilon_pilon-augustus-gene-0.0-mRNA-1	exigua_EL1	exigua_egg	419.287	9.30139	214.294	5.47049	0.409015	13.3748	8.4902e-41	1.11911e-39
1	maker-tulip_contig_674_pilon_pilon-augustus-gene-0.15-mRNA-1	exigua_EL1	exigua_egg	303.923	16.6668	160.295	4.17288	0.312067	13.3717	8.84718e-41	1.16486e-39
8	maker-tulip_contig_870_pilon_pilon-augustus-gene-0.0-mRNA-1	exigua_EL1	exigua_egg	3.0539	370.437	186.746	-6.92606	0.518114	-13.3678	9.32292e-41	1.22613e-39
1	augustus_masked-tulip_contig_841_pilon_pilon-processed-gene-0.108-mRNA-1	exigua_EL1	exigua_egg	48.9904	356.345	202.668	-2.86195	0.214267	-13.3569	1.07904e-40	1.41755e-39
3	augustus_masked-tulip_contig_777_pilon_pilon-processed-gene-0.9-mRNA-1	exigua_EL1	exigua_egg	515.871	2.79427	259.333	7.51348	0.562591	13.3551	1.10576e-40	1.45103e-39
1	maker-tulip_contig_208_pilon_pilon-augustus-gene-1.124-mRNA-1	exigua_EL1	exigua_egg	369.246	4.82316	187.034	6.22843	0.466502	13.3513	1.16354e-40	1.52516e-39
5	augustus_masked-tulip_contig_187_pilon_pilon-processed-gene-1.6-mRNA-1	exigua_EL1	exigua_egg	369.429	18.2193	193.824	4.35107	0.325907	13.3507	1.17411e-40	1.5373e-39
1	maker-tulip_contig_407_pilon_pilon-augustus-gene-8.41-mRNA-1	exigua_EL1	exigua_egg	141.328	628.292	384.81	-2.15321	0.161472	-13.3348	1.45204e-40	1.8991e-39
1	maker-tulip_contig_247_pilon_pilon-augustus-gene-2.118-mRNA-1	exigua_EL1	exigua_egg	264.562	8.18331	136.373	5.02324	0.376866	13.329	1.57069e-40	2.052e-39
1	maker-tulip_contig_4_pilon_pilon-augustus-gene-0.5-mRNA-1	exigua_EL1	exigua_egg	699.257	2.11031	350.684	8.3663	0.62825	13.3168	1.8477e-40	2.41121e-39
3	maker-tulip_contig_208_pilon_pilon-augustus-gene-0.10-mRNA-1	exigua_EL1	exigua_egg	2589.96	1.15692	1295.56	11.2531	0.845392	13.3111	1.99617e-40	2.60209e-39
1	maker-tulip_contig_807_pilon_pilon-augustus-gene-3.31-mRNA-1	exigua_EL1	exigua_egg	595.371	11.8054	303.588	5.68912	0.427532	13.3069	2.11143e-40	2.74626e-39
1	maker-tulip_contig_157_pilon_pilon-augustus-gene-0.24-mRNA-1	exigua_EL1	exigua_egg	501.432	73.4384	287.435	2.7684	0.208254	13.2934	2.52991e-40	3.28693e-39
1	maker-tulip_contig_429_pilon_pilon-augustus-gene-1.49-mRNA-1	exigua_EL1	exigua_egg	234.002	1209.14	721.571	-2.36921	0.178278	-13.2894	2.66727e-40	3.46157e-39
1	maker-tulip_contig_396_pilon_pilon-augustus-gene-0.33-mRNA-1	exigua_EL1	exigua_egg	10018.5	1442.85	5730.68	2.79592	0.210509	13.2817	2.95727e-40	3.83371e-39
1	maker-tulip_contig_491_pilon_pilon-augustus-gene-1.54-mRNA-1	exigua_EL1	exigua_egg	140.225	863.808	502.017	-2.62389	0.19758	-13.2802	3.0177e-40	3.90776e-39
1	maker-tulip_contig_33_pilon_pilon-augustus-gene-4.6-mRNA-1	exigua_EL1	exigua_egg	44.911	415.942	230.427	-3.20968	0.241878	-13.2698	3.46337e-40	4.47995e-39
1	maker-tulip_contig_89_pilon_pilon-augustus-gene-3.29-mRNA-1	exigua_EL1	exigua_egg	297.358	1464.12	880.738	-2.2996	0.173296	-13.2697	3.46773e-40	4.48067e-39
1	augustus_masked-tulip_contig_279_pilon_pilon-processed-gene-0.57-mRNA-1	exigua_EL1	exigua_egg	654.756	12.162	333.459	5.78085	0.435806	13.2647	3.70806e-40	4.78595e-39
5	maker-tulip_contig_112_pilon_pilon-augustus-gene-0.31-mRNA-1	exigua_EL1	exigua_egg	335.617	37.9208	186.769	3.14104	0.236828	13.2629	3.79727e-40	4.89574e-39
1	maker-tulip_contig_123_pilon_pilon-augustus-gene-0.72-mRNA-1	exigua_EL1	exigua_egg	665.508	31.6197	348.564	4.41029	0.332661	13.2576	4.07828e-40	5.25229e-39
1	maker-tulip_contig_407_pilon_pilon-augustus-gene-3.13-mRNA-1	exigua_EL1	exigua_egg	243.462	1147.93	695.695	-2.23748	0.16879	-13.256	4.1636e-40	5.35632e-39
3	augustus_masked-tulip_contig_623_pilon_pilon-processed-gene-1.74-mRNA-1	exigua_EL1	exigua_egg	490.12	26.4494	258.285	4.21921	0.318298	13.2555	4.19148e-40	5.3863e-39
1	augustus_masked-tulip_contig_733_pilon_pilon-processed-gene-0.8-mRNA-1	exigua_EL1	exigua_egg	22.4968	261.965	142.231	-3.54151	0.2672	-13.2541	4.2712e-40	5.48277e-39
1	maker-tulip_contig_236_pilon_pilon-augustus-gene-4.95-mRNA-1	exigua_EL1	exigua_egg	288.534	5.05576	146.795	5.86246	0.442604	13.2454	4.79867e-40	6.15316e-39
1	augustus_masked-tulip_contig_684_pilon_pilon-processed-gene-0.15-mRNA-1	exigua_EL1	exigua_egg	13.399	230.407	121.903	-4.10392	0.309887	-13.2433	4.93608e-40	6.32247e-39
3	maker-tulip_contig_526_pilon_pilon-augustus-gene-0.7-mRNA-1	exigua_EL1	exigua_egg	2738.49	1.02315	1369.76	11.3367	0.856949	13.2291	5.95584e-40	7.62037e-39
1	augustus_masked-tulip_contig_257_pilon_pilon-processed-gene-0.39-mRNA-1	exigua_EL1	exigua_egg	54.6148	418.303	236.459	-2.93906	0.222293	-13.2215	6.59193e-40	8.42509e-39
1	maker-tulip_contig_317_pilon_pilon-augustus-gene-1.22-mRNA-1	exigua_EL1	exigua_egg	92.3628	594.218	343.29	-2.685	0.203086	-13.221	6.64013e-40	8.47749e-39
1	maker-tulip_contig_323_pilon_pilon-augustus-gene-8.40-mRNA-1	exigua_EL1	exigua_egg	49.6297	437.456	243.543	-3.13942	0.237591	-13.2135	7.32876e-40	9.34655e-39
1	maker-tulip_contig_362_pilon_pilon-augustus-gene-7.17-mRNA-1	exigua_EL1	exigua_egg	472.044	1971.67	1221.86	-2.06208	0.156192	-13.2022	8.52032e-40	1.08427e-38
3	maker-tulip_contig_323_pilon_pilon-augustus-gene-1.24-mRNA-1	exigua_EL1	exigua_egg	1610.42	45.9388	828.179	5.12516	0.388364	13.1968	9.15599e-40	1.16391e-38
1	augustus_masked-tulip_contig_340_pilon_pilon-processed-gene-0.77-mRNA-1	exigua_EL1	exigua_egg	137.447	851.993	494.72	-2.63218	0.199537	-13.1915	9.82657e-40	1.2478e-38
1	maker-tulip_contig_77_pilon_pilon-augustus-gene-0.98-mRNA-1	exigua_EL1	exigua_egg	194.673	915.48	555.077	-2.23337	0.16944	-13.1809	1.13083e-39	1.43288e-38
3	maker-tulip_contig_860_pilon_pilon-augustus-gene-6.11-mRNA-1	exigua_EL1	exigua_egg	258.033	11.8362	134.934	4.46242	0.338609	13.1787	1.16396e-39	1.47327e-38
3	augustus_masked-tulip_contig_669_pilon_pilon-processed-gene-2.29-mRNA-1	exigua_EL1	exigua_egg	435.992	3.16826	219.58	7.10007	0.539211	13.1675	1.34965e-39	1.70464e-38
3	maker-tulip_contig_807_pilon_pilon-augustus-gene-1.47-mRNA-1	exigua_EL1	exigua_egg	1282.35	1.40879	641.88	9.82588	0.746594	13.1609	1.47229e-39	1.85556e-38
1	augustus_masked-tulip_contig_831_pilon_pilon-processed-gene-0.16-mRNA-1	exigua_EL1	exigua_egg	82.52	444.379	263.449	-2.42928	0.184593	-13.1602	1.48696e-39	1.87204e-38
1	maker-tulip_contig_89_pilon_pilon-augustus-gene-0.9-mRNA-1	exigua_EL1	exigua_egg	1007.63	4661.44	2834.53	-2.20964	0.167934	-13.1578	1.53558e-39	1.93119e-38
1	augustus_masked-tulip_contig_421_pilon_pilon-processed-gene-0.7-mRNA-1	exigua_EL1	exigua_egg	184.893	1078.34	631.619	-2.54434	0.19352	-13.1477	1.75431e-39	2.19923e-38
5	maker-tulip_contig_407_pilon_pilon-augustus-gene-8.75-mRNA-1	exigua_EL1	exigua_egg	282.543	16.1921	149.367	4.12176	0.313607	13.1431	1.86487e-39	2.33286e-38
3	maker-tulip_contig_341_pilon_pilon-augustus-gene-0.2-mRNA-1	exigua_EL1	exigua_egg	384.762	3.15086	193.956	6.92003	0.526974	13.1316	2.16948e-39	2.70817e-38
1	maker-tulip_contig_731_pilon_pilon-augustus-gene-0.30-mRNA-1	exigua_EL1	exigua_egg	81.9191	622.162	352.04	-2.92374	0.222658	-13.1311	2.18467e-39	2.72425e-38
4	maker-tulip_contig_60_pilon_pilon-augustus-gene-0.17-mRNA-1	exigua_EL1	exigua_egg	2451.13	1.06386	1226.1	11.1754	0.851365	13.1264	2.32407e-39	2.89502e-38
5	maker-tulip_contig_39_pilon_pilon-augustus-gene-1.161-mRNA-1	exigua_EL1	exigua_egg	19244.2	0.385642	9622.31	15.6265	1.19083	13.1224	2.44946e-39	3.04477e-38
3	augustus_masked-tulip_contig_608_pilon_pilon-processed-gene-0.0-mRNA-1	exigua_EL1	exigua_egg	582.064	2.22078	292.142	8.09827	0.617354	13.1177	2.60704e-39	3.23723e-38
1	maker-tulip_contig_506_pilon_pilon-augustus-gene-1.104-mRNA-1	exigua_EL1	exigua_egg	240.044	1059.33	649.686	-2.14141	0.163314	-13.1122	2.80191e-39	3.47555e-38
1	maker-tulip_contig_597_pilon_pilon-augustus-gene-5.23-mRNA-1	exigua_EL1	exigua_egg	333.141	1441.54	887.34	-2.11342	0.161261	-13.1056	3.05866e-39	3.79003e-38
1	maker-tulip_contig_762_pilon_pilon-augustus-gene-0.16-mRNA-1	exigua_EL1	exigua_egg	437.928	30.7685	234.348	3.83958	0.293177	13.0965	3.44939e-39	4.26522e-38
8	augustus_masked-tulip_contig_677_pilon_pilon-processed-gene-1.93-mRNA-1	exigua_EL1	exigua_egg	7.98593	429.12	218.553	-5.75615	0.439561	-13.0952	3.50672e-39	4.33157e-38
6	maker-tulip_contig_218_pilon_pilon-augustus-gene-1.109-mRNA-1	exigua_EL1	exigua_egg	2665.44	1.0348	1333.24	11.2975	0.863472	13.0838	4.07725e-39	5.03103e-38
3	maker-tulip_contig_218_pilon_pilon-augustus-gene-2.8-mRNA-1	exigua_EL1	exigua_egg	1224.22	1.49021	612.856	9.75636	0.746119	13.0761	4.50737e-39	5.55595e-38
1	maker-tulip_contig_361_pilon_pilon-augustus-gene-0.38-mRNA-1	exigua_EL1	exigua_egg	475.047	4.66437	239.856	6.68751	0.511482	13.0748	4.58947e-39	5.64533e-38
1	maker-tulip_contig_605_pilon_pilon-augustus-gene-0.61-mRNA-1	exigua_EL1	exigua_egg	7.87964	272.334	140.107	-5.10586	0.390654	-13.0701	4.88308e-39	6.00023e-38
1	maker-tulip_contig_610_pilon_pilon-augustus-gene-2.0-mRNA-1	exigua_EL1	exigua_egg	774.008	116.102	445.055	2.74126	0.209882	13.061	5.5019e-39	6.75358e-38
1	maker-tulip_contig_281_pilon_pilon-augustus-gene-3.38-mRNA-1	exigua_EL1	exigua_egg	64.1263	452.494	258.31	-2.81897	0.215871	-13.0586	5.67682e-39	6.96105e-38
5	augustus_masked-tulip_contig_916_pilon_pilon-processed-gene-3.4-mRNA-1	exigua_EL1	exigua_egg	8141.28	0.730575	4071.01	13.4916	1.03321	13.058	5.72221e-39	7.00941e-38
1	maker-tulip_contig_504_pilon_pilon-augustus-gene-2.16-mRNA-1	exigua_EL1	exigua_egg	772.739	174.913	473.826	2.14097	0.163981	13.0562	5.85638e-39	7.16632e-38
1	augustus_masked-tulip_contig_42_pilon_pilon-processed-gene-1.66-mRNA-1	exigua_EL1	exigua_egg	282.049	1165.72	723.885	-2.04785	0.156965	-13.0465	6.65462e-39	8.13465e-38
1	augustus_masked-tulip_contig_648_pilon_pilon-processed-gene-0.14-mRNA-1	exigua_EL1	exigua_egg	155.477	769.334	462.406	-2.30648	0.176893	-13.0388	7.36095e-39	8.98875e-38
1	maker-tulip_contig_378_pilon_pilon-augustus-gene-3.7-mRNA-1	exigua_EL1	exigua_egg	505.43	4.23802	254.834	6.89752	0.529051	13.0375	7.4841e-39	9.12864e-38
5	maker-tulip_contig_852_pilon_pilon-augustus-gene-0.19-mRNA-1	exigua_EL1	exigua_egg	9463.39	0	4731.7	15.5643	1.19382	13.0375	7.491e-39	9.12864e-38
5	maker-tulip_contig_531_pilon_pilon-augustus-gene-2.5-mRNA-1	exigua_EL1	exigua_egg	571.598	86.6022	329.1	2.72083	0.208765	13.033	7.94356e-39	9.67014e-38
8	augustus_masked-tulip_contig_584_pilon_pilon-processed-gene-2.43-mRNA-1	exigua_EL1	exigua_egg	3.91647	291.78	147.848	-6.20631	0.476444	-13.0263	8.66739e-39	1.05295e-37
1	maker-tulip_contig_506_pilon_pilon-augustus-gene-0.27-mRNA-1	exigua_EL1	exigua_egg	472.834	2199.44	1336.14	-2.21734	0.170337	-13.0174	9.74339e-39	1.18245e-37
11	augustus_masked-tulip_contig_33_pilon_pilon-processed-gene-1.1-mRNA-1	exigua_EL1	exigua_egg	279.49	1411.87	845.681	-2.33665	0.179637	-13.0077	1.1069e-38	1.34057e-37
1	maker-tulip_contig_441_pilon_pilon-augustus-gene-7.12-mRNA-1	exigua_EL1	exigua_egg	465.806	2.64713	234.226	7.55133	0.581175	12.9932	1.33677e-38	1.6173e-37
1	maker-tulip_contig_384_pilon_pilon-augustus-gene-0.72-mRNA-1	exigua_EL1	exigua_egg	177.243	1151.39	664.314	-2.69977	0.20799	-12.9803	1.58318e-38	1.91346e-37
1	augustus_masked-tulip_contig_58_pilon_pilon-processed-gene-2.6-mRNA-1	exigua_EL1	exigua_egg	529.234	92.7335	310.984	2.51161	0.193522	12.9784	1.62265e-38	1.95915e-37
1	maker-tulip_contig_320_pilon_pilon-augustus-gene-3.42-mRNA-1	exigua_EL1	exigua_egg	440.218	1908.64	1174.43	-2.11583	0.16329	-12.9575	2.12975e-38	2.56878e-37
1	maker-tulip_contig_153_pilon_pilon-augustus-gene-1.10-mRNA-1	exigua_EL1	exigua_egg	389.485	60.8142	225.15	2.68364	0.207121	12.9569	2.14763e-38	2.58769e-37
1	augustus_masked-tulip_contig_280_pilon_pilon-processed-gene-1.8-mRNA-1	exigua_EL1	exigua_egg	73.9543	812.785	443.369	-3.4567	0.266893	-12.9516	2.29973e-38	2.76813e-37
1	maker-tulip_contig_907_pilon_pilon-augustus-gene-8.20-mRNA-1	exigua_EL1	exigua_egg	546.44	2.04629	274.243	8.01248	0.618756	12.9493	2.36965e-38	2.84938e-37
1	maker-tulip_contig_67_pilon_pilon-augustus-gene-0.0-mRNA-1	exigua_EL1	exigua_egg	496.787	2.43194	249.609	7.65222	0.59143	12.9385	2.72876e-38	3.27785e-37
1	maker-tulip_contig_530_pilon_pilon-augustus-gene-0.48-mRNA-1	exigua_EL1	exigua_egg	193.847	857.667	525.757	-2.14532	0.165845	-12.9357	2.83129e-38	3.39755e-37
1	maker-tulip_contig_196_pilon_pilon-augustus-gene-2.8-mRNA-1	exigua_EL1	exigua_egg	386.662	50.0744	218.368	2.94306	0.227524	12.9352	2.85039e-38	3.41699e-37
1	maker-tulip_contig_674_pilon_pilon-augustus-gene-4.0-mRNA-1	exigua_EL1	exigua_egg	447.967	49.2284	248.598	3.19168	0.246757	12.9345	2.87389e-38	3.44048e-37
1	maker-tulip_contig_168_pilon_pilon-augustus-gene-0.10-mRNA-1	exigua_EL1	exigua_egg	632.024	144.926	388.475	2.12485	0.164278	12.9345	2.87583e-38	3.44048e-37
1	maker-tulip_contig_508_pilon_pilon-augustus-gene-1.33-mRNA-1	exigua_EL1	exigua_egg	2580.41	117.987	1349.2	4.45493	0.344457	12.9332	2.92398e-38	3.49454e-37
1	maker-tulip_contig_208_pilon_pilon-augustus-gene-1.62-mRNA-1	exigua_EL1	exigua_egg	84.6901	508.52	296.605	-2.58511	0.19989	-12.9327	2.94423e-38	3.51517e-37
1	maker-tulip_contig_247_pilon_pilon-augustus-gene-1.63-mRNA-1	exigua_EL1	exigua_egg	100.705	654.351	377.528	-2.69844	0.208679	-12.931	3.00826e-38	3.58799e-37
1	maker-tulip_contig_702_pilon_pilon-augustus-gene-0.52-mRNA-1	exigua_EL1	exigua_egg	251.171	12.1945	131.683	4.35002	0.336622	12.9226	3.35646e-38	3.99924e-37
1	maker-tulip_contig_645_pilon_pilon-augustus-gene-2.9-mRNA-1	exigua_EL1	exigua_egg	379.613	3.29629	191.455	6.89436	0.534143	12.9073	4.09279e-38	4.86674e-37
1	maker-tulip_contig_59_pilon_pilon-augustus-gene-2.31-mRNA-1	exigua_EL1	exigua_egg	1054.52	4884.43	2969.47	-2.21145	0.17135	-12.9061	4.15945e-38	4.94103e-37
5	augustus_masked-tulip_contig_107_pilon_pilon-processed-gene-0.16-mRNA-1	exigua_EL1	exigua_egg	319.421	25.8152	172.618	3.61919	0.280512	12.9021	4.37984e-38	5.19759e-37
1	maker-tulip_contig_759_pilon_pilon-augustus-gene-1.63-mRNA-1	exigua_EL1	exigua_egg	354.211	1544.19	949.203	-2.12403	0.164674	-12.8984	4.59486e-38	5.44727e-37
5	augustus_masked-tulip_contig_677_pilon_pilon-processed-gene-1.74-mRNA-1	exigua_EL1	exigua_egg	370.222	40.4863	205.354	3.19037	0.24737	12.8971	4.67054e-38	5.53142e-37
1	maker-tulip_contig_531_pilon_pilon-augustus-gene-4.42-mRNA-1	exigua_EL1	exigua_egg	60.7061	408.372	234.539	-2.74859	0.21331	-12.8854	5.43663e-38	6.43225e-37
1	maker-tulip_contig_504_pilon_pilon-augustus-gene-2.19-mRNA-1	exigua_EL1	exigua_egg	531.193	3005.71	1768.45	-2.50045	0.194095	-12.8826	5.63903e-38	6.66503e-37
3	maker-tulip_contig_1_pilon_pilon-augustus-gene-2.9-mRNA-1	exigua_EL1	exigua_egg	2454.24	133.721	1293.98	4.19513	0.325689	12.8808	5.7758e-38	6.81984e-37
1	maker-tulip_contig_916_pilon_pilon-augustus-gene-0.4-mRNA-1	exigua_EL1	exigua_egg	1576.17	250.045	913.108	2.65527	0.206277	12.8723	6.44332e-38	7.6004e-37
1	maker-tulip_contig_318_pilon_pilon-augustus-gene-1.35-mRNA-1	exigua_EL1	exigua_egg	478.122	1938.19	1208.16	-2.0195	0.156951	-12.8671	6.89415e-38	8.12406e-37
1	augustus_masked-tulip_contig_362_pilon_pilon-processed-gene-8.35-mRNA-1	exigua_EL1	exigua_egg	2689.08	652.33	1670.7	2.04394	0.158895	12.8635	7.2264e-38	8.50709e-37
3	maker-tulip_contig_362_pilon_pilon-augustus-gene-6.19-mRNA-1	exigua_EL1	exigua_egg	276.863	4.45493	140.659	5.91921	0.460234	12.8613	7.43066e-38	8.73881e-37
1	maker-tulip_contig_454_pilon_pilon-augustus-gene-1.12-mRNA-1	exigua_EL1	exigua_egg	709.871	1.80608	355.839	8.64942	0.67278	12.8562	7.934e-38	9.31218e-37
3	maker-tulip_contig_45_pilon_pilon-augustus-gene-0.44-mRNA-1	exigua_EL1	exigua_egg	320.107	3.67028	161.889	6.49626	0.505374	12.8543	8.13121e-38	9.53415e-37
5	maker-tulip_contig_531_pilon_pilon-augustus-gene-6.14-mRNA-1	exigua_EL1	exigua_egg	603.355	96.3182	349.837	2.64466	0.20582	12.8494	8.6673e-38	1.01526e-36
5	maker-tulip_contig_407_pilon_pilon-augustus-gene-1.62-mRNA-1	exigua_EL1	exigua_egg	580.538	2.15677	291.347	8.09612	0.630128	12.8484	8.78405e-38	1.02792e-36
1	maker-tulip_contig_31_pilon_pilon-augustus-gene-1.52-mRNA-1	exigua_EL1	exigua_egg	391.006	4.42991	197.718	6.51511	0.507141	12.8467	8.97107e-38	1.04876e-36
4	maker-tulip_contig_270_pilon_pilon-augustus-gene-3.66-mRNA-1	exigua_EL1	exigua_egg	483.578	2.61807	243.098	7.60469	0.592108	12.8434	9.36371e-38	1.09358e-36
1	maker-tulip_contig_479_pilon_pilon-augustus-gene-4.20-mRNA-1	exigua_EL1	exigua_egg	683.5	1.92821	342.714	8.59139	0.669417	12.8341	1.05575e-37	1.23178e-36
3	maker-tulip_contig_827_pilon_pilon-augustus-gene-2.100-mRNA-1	exigua_EL1	exigua_egg	2907.04	1.0348	1454.04	11.4235	0.890491	12.8283	1.13763e-37	1.326e-36
1	maker-tulip_contig_388_pilon_pilon-augustus-gene-0.53-mRNA-1	exigua_EL1	exigua_egg	23.7263	267.322	145.524	-3.4932	0.272408	-12.8234	1.21262e-37	1.41062e-36
5	maker-tulip_contig_854_pilon_pilon-augustus-gene-1.41-mRNA-1	exigua_EL1	exigua_egg	334.565	31.5167	183.041	3.41832	0.266723	12.816	1.3348e-37	1.55121e-36
-	maker-tulip_contig_424_pilon_pilon-augustus-gene-2.67-mRNA-1	exigua_EL1	exigua_egg	196.676	826.454	511.565	-2.07138	0.161694	-12.8105	1.43254e-37	1.66316e-36
1	maker-tulip_contig_327_pilon_pilon-augustus-gene-6.6-mRNA-1	exigua_EL1	exigua_egg	2420.25	414.7	1417.48	2.54618	0.198815	12.8068	1.50202e-37	1.7421e-36
3	maker-tulip_contig_3_pilon_pilon-augustus-gene-2.27-mRNA-1	exigua_EL1	exigua_egg	797.157	48.7389	422.948	4.02306	0.314225	12.8031	1.57541e-37	1.82543e-36
5	maker-tulip_contig_597_pilon_pilon-augustus-gene-0.8-mRNA-1	exigua_EL1	exigua_egg	660.739	47.7769	354.258	3.79714	0.296608	12.8019	1.60029e-37	1.85244e-36
1	maker-tulip_contig_217_pilon_pilon-augustus-gene-4.5-mRNA-1	exigua_EL1	exigua_egg	85.991	552.269	319.13	-2.68289	0.209612	-12.7993	1.65488e-37	1.91375e-36
1	maker-tulip_contig_45_pilon_pilon-augustus-gene-0.19-mRNA-1	exigua_EL1	exigua_egg	240.42	15.0761	127.748	3.98769	0.311796	12.7894	1.87849e-37	2.1702e-36
5	maker-tulip_contig_674_pilon_pilon-augustus-gene-3.7-mRNA-1	exigua_EL1	exigua_egg	348.149	5.26692	176.708	6.04008	0.472532	12.7824	2.0567e-37	2.37376e-36
5	maker-tulip_contig_247_pilon_pilon-augustus-gene-2.134-mRNA-1	exigua_EL1	exigua_egg	730.423	57.3742	393.899	3.6687	0.287261	12.7713	2.3705e-37	2.73327e-36
1	maker-tulip_contig_674_pilon_pilon-augustus-gene-11.9-mRNA-1	exigua_EL1	exigua_egg	316.929	20.3528	168.641	3.96959	0.311102	12.7598	2.75061e-37	3.16536e-36
1	maker-tulip_contig_81_pilon_pilon-augustus-gene-5.12-mRNA-1	exigua_EL1	exigua_egg	89.5405	459.734	274.637	-2.36052	0.185182	-12.747	3.24003e-37	3.72492e-36
1	maker-tulip_contig_715_pilon_pilon-augustus-gene-5.60-mRNA-1	exigua_EL1	exigua_egg	446.226	11.2162	228.721	5.3334	0.418438	12.746	3.28252e-37	3.7701e-36
1	maker-tulip_contig_21_pilon_pilon-augustus-gene-0.21-mRNA-1	exigua_EL1	exigua_egg	183.926	969.161	576.544	-2.39775	0.188275	-12.7354	3.75946e-37	4.3053e-36
1	augustus_masked-tulip_contig_82_pilon_pilon-processed-gene-1.1-mRNA-1	exigua_EL1	exigua_egg	540.812	2.16842	271.49	7.99342	0.628411	12.7201	4.57526e-37	5.23072e-36
1	augustus_masked-tulip_contig_412_pilon_pilon-processed-gene-0.64-mRNA-1	exigua_EL1	exigua_egg	411.443	3.1218	207.282	7.0192	0.552046	12.7149	4.88803e-37	5.58145e-36
1	maker-tulip_contig_35_pilon_pilon-augustus-gene-0.104-mRNA-1	exigua_EL1	exigua_egg	121.033	677.196	399.114	-2.48368	0.195517	-12.7031	5.68203e-37	6.4818e-36
1	maker-tulip_contig_620_pilon_pilon-augustus-gene-0.42-mRNA-1	exigua_EL1	exigua_egg	643.84	3279.24	1961.54	-2.34841	0.18498	-12.6955	6.26036e-37	7.13463e-36
1	maker-tulip_contig_104_pilon_pilon-augustus-gene-0.27-mRNA-1	exigua_EL1	exigua_egg	347.485	4.68767	176.086	6.23564	0.491274	12.6928	6.48182e-37	7.37988e-36
1	maker-tulip_contig_323_pilon_pilon-augustus-gene-4.23-mRNA-1	exigua_EL1	exigua_egg	599.098	2.10441	300.601	8.14405	0.641743	12.6905	6.67511e-37	7.59261e-36
1	maker-tulip_contig_37_pilon_pilon-augustus-gene-2.32-mRNA-1	exigua_EL1	exigua_egg	2493.86	347.533	1420.7	2.8443	0.22421	12.6859	7.08212e-37	8.0478e-36
1	maker-tulip_contig_854_pilon_pilon-augustus-gene-0.10-mRNA-1	exigua_EL1	exigua_egg	49.1286	471.359	260.244	-3.26387	0.257289	-12.6856	7.10681e-37	8.06808e-36
1	maker-tulip_contig_516_pilon_pilon-augustus-gene-3.8-mRNA-1	exigua_EL1	exigua_egg	50.2028	326.326	188.264	-2.6999	0.212868	-12.6835	7.30431e-37	8.28431e-36
1	augustus_masked-tulip_contig_616_pilon_pilon-processed-gene-0.48-mRNA-1	exigua_EL1	exigua_egg	87.4386	679.304	383.372	-2.95824	0.233289	-12.6806	7.57417e-37	8.58212e-36
1	maker-tulip_contig_586_pilon_pilon-augustus-gene-12.1-mRNA-1	exigua_EL1	exigua_egg	804.196	160.243	482.22	2.32931	0.183724	12.6783	7.80097e-37	8.83061e-36
5	maker-tulip_contig_109_pilon_pilon-augustus-gene-1.11-mRNA-1	exigua_EL1	exigua_egg	262.675	4.52469	133.6	5.84091	0.460713	12.678	7.83146e-37	8.85661e-36
1	augustus_masked-tulip_contig_56_pilon_pilon-processed-gene-0.89-mRNA-1	exigua_EL1	exigua_egg	290.936	3.86978	147.403	6.22716	0.491223	12.6768	7.94636e-37	8.97794e-36
5	maker-tulip_contig_623_pilon_pilon-augustus-gene-4.95-mRNA-1	exigua_EL1	exigua_egg	415.81	58.469	237.139	2.82458	0.22287	12.6737	8.27056e-37	9.33527e-36
3	maker-tulip_contig_340_pilon_pilon-augustus-gene-0.19-mRNA-1	exigua_EL1	exigua_egg	937.86	1.35643	469.608	9.37583	0.740567	12.6603	9.80752e-37	1.10595e-35
1	maker-tulip_contig_716_pilon_pilon-augustus-gene-1.31-mRNA-1	exigua_EL1	exigua_egg	438.786	1807.36	1123.07	-2.04207	0.161328	-12.6579	1.01224e-36	1.14037e-35
1	maker-tulip_contig_257_pilon_pilon-augustus-gene-0.32-mRNA-1	exigua_EL1	exigua_egg	126.807	724.1	425.454	-2.51382	0.198655	-12.6542	1.06065e-36	1.19377e-35
1	maker-tulip_contig_73_pilon_pilon-augustus-gene-0.67-mRNA-1	exigua_EL1	exigua_egg	18.4651	284.886	151.675	-3.94346	0.311638	-12.654	1.0634e-36	1.19571e-35
1	maker-tulip_contig_90_pilon_pilon-augustus-gene-0.60-mRNA-1	exigua_EL1	exigua_egg	520.647	2360.49	1440.57	-2.18067	0.172402	-12.6488	1.13658e-36	1.27668e-35
1	maker-tulip_contig_424_pilon_pilon-augustus-gene-0.53-mRNA-1	exigua_EL1	exigua_egg	131.52	720.683	426.102	-2.4547	0.194068	-12.6487	1.13757e-36	1.27668e-35
1	augustus_masked-tulip_contig_618_pilon_pilon-processed-gene-0.3-mRNA-1	exigua_EL1	exigua_egg	626.107	17.6536	321.88	5.14772	0.407206	12.6416	1.24552e-36	1.3965e-35
5	maker-tulip_contig_31_pilon_pilon-augustus-gene-1.59-mRNA-1	exigua_EL1	exigua_egg	1747.86	1.07551	874.467	10.6873	0.845616	12.6385	1.29492e-36	1.45051e-35
1	maker-tulip_contig_196_pilon_pilon-augustus-gene-4.21-mRNA-1	exigua_EL1	exigua_egg	49.8554	307.992	178.924	-2.62631	0.207805	-12.6384	1.29735e-36	1.45185e-35
5	maker-tulip_contig_362_pilon_pilon-augustus-gene-7.12-mRNA-1	exigua_EL1	exigua_egg	1920.18	1.02315	960.604	10.8246	0.856614	12.6365	1.32914e-36	1.48601e-35
6	maker-tulip_contig_653_pilon_pilon-augustus-gene-0.13-mRNA-1	exigua_EL1	exigua_egg	2536.41	0.999842	1268.71	11.23	0.889064	12.6313	1.41956e-36	1.5856e-35
1	maker-tulip_contig_505_pilon_pilon-augustus-gene-2.36-mRNA-1	exigua_EL1	exigua_egg	33.4303	334.353	183.892	-3.32106	0.26308	-12.6238	1.56168e-36	1.74104e-35
1	maker-tulip_contig_405_pilon_pilon-augustus-gene-0.40-mRNA-1	exigua_EL1	exigua_egg	475.77	2648.59	1562.18	-2.47683	0.196277	-12.6191	1.65802e-36	1.84495e-35
3	augustus_masked-tulip_contig_121_pilon_pilon-processed-gene-3.31-mRNA-1	exigua_EL1	exigua_egg	287.905	33.0802	160.493	3.11845	0.247136	12.6183	1.67308e-36	1.85996e-35
1	augustus_masked-tulip_contig_468_pilon_pilon-processed-gene-3.112-mRNA-1	exigua_EL1	exigua_egg	1547.99	173.745	860.867	3.15407	0.25026	12.6032	2.02766e-36	2.24779e-35
1	augustus_masked-tulip_contig_862_pilon_pilon-processed-gene-1.0-mRNA-1	exigua_EL1	exigua_egg	86.9973	1000.47	543.732	-3.52431	0.279694	-12.6006	2.09559e-36	2.3209e-35
11	maker-tulip_contig_609_pilon_pilon-augustus-gene-0.62-mRNA-1	exigua_EL1	exigua_egg	239.266	1370.73	804.999	-2.51813	0.200012	-12.5899	2.39898e-36	2.65443e-35
5	augustus_masked-tulip_contig_44_pilon_pilon-processed-gene-6.17-mRNA-1	exigua_EL1	exigua_egg	12006.4	0.385642	6003.37	14.9459	1.18723	12.5889	2.43119e-36	2.68502e-35
1	maker-tulip_contig_585_pilon_pilon-augustus-gene-0.14-mRNA-1	exigua_EL1	exigua_egg	30.7473	377.572	204.159	-3.61843	0.287491	-12.5863	2.51321e-36	2.773e-35
3	augustus_masked-tulip_contig_734_pilon_pilon-processed-gene-0.14-mRNA-1	exigua_EL1	exigua_egg	349.204	2.79427	175.999	6.95027	0.552276	12.5848	2.56077e-36	2.82284e-35
1	augustus_masked-tulip_contig_125_pilon_pilon-processed-gene-0.402-mRNA-1	exigua_EL1	exigua_egg	531.63	2.59477	267.112	7.74011	0.615489	12.5755	2.8784e-36	3.17001e-35
8	maker-tulip_contig_597_pilon_pilon-augustus-gene-3.10-mRNA-1	exigua_EL1	exigua_egg	37.3001	705.792	371.546	-4.24117	0.337415	-12.5696	3.10377e-36	3.41502e-35
1	maker-tulip_contig_870_pilon_pilon-augustus-gene-4.61-mRNA-1	exigua_EL1	exigua_egg	340.059	30.0981	185.078	3.49981	0.278469	12.568	3.16586e-36	3.48008e-35
1	maker-tulip_contig_620_pilon_pilon-augustus-gene-1.17-mRNA-1	exigua_EL1	exigua_egg	426.869	71.6481	249.259	2.57427	0.204842	12.5671	3.20396e-36	3.51868e-35
1	maker-tulip_contig_407_pilon_pilon-augustus-gene-0.64-mRNA-1	exigua_EL1	exigua_egg	227.132	10.8264	118.979	4.37879	0.348443	12.5668	3.21665e-36	3.52933e-35
6	maker-tulip_contig_2_pilon_pilon-augustus-gene-5.28-mRNA-1	exigua_EL1	exigua_egg	5988.93	0	2994.46	14.9043	1.18604	12.5664	3.23078e-36	3.54154e-35
1	augustus_masked-tulip_contig_85_pilon_pilon-processed-gene-1.12-mRNA-1	exigua_EL1	exigua_egg	468.715	65.9954	267.355	2.82773	0.225079	12.5633	3.35978e-36	3.67952e-35
11	maker-tulip_contig_102_pilon_pilon-augustus-gene-0.55-mRNA-1	exigua_EL1	exigua_egg	10.3852	479.03	244.708	-5.53073	0.440274	-12.562	3.4155e-36	3.73707e-35
1	augustus_masked-tulip_contig_571_pilon_pilon-processed-gene-0.1-mRNA-1	exigua_EL1	exigua_egg	364.678	36.173	200.426	3.32949	0.265152	12.5569	3.64296e-36	3.98225e-35
1	maker-tulip_contig_76_pilon_pilon-augustus-gene-0.11-mRNA-1	exigua_EL1	exigua_egg	38.3381	401.439	219.889	-3.38889	0.270011	-12.5509	3.92884e-36	4.29077e-35
1	maker-tulip_contig_46_pilon_pilon-augustus-gene-2.19-mRNA-1	exigua_EL1	exigua_egg	1878.97	382.05	1130.51	2.29888	0.183181	12.5498	3.98403e-36	4.34702e-35
5	maker-tulip_contig_237_pilon_pilon-augustus-gene-0.42-mRNA-1	exigua_EL1	exigua_egg	318.689	36.9383	177.814	3.10609	0.247504	12.5497	3.99201e-36	4.3517e-35
5	maker-tulip_contig_52_pilon_pilon-augustus-gene-3.4-mRNA-1	exigua_EL1	exigua_egg	1493.96	338.4	916.18	2.1439	0.170867	12.5472	4.11881e-36	4.48164e-35
1	maker-tulip_contig_784_pilon_pilon-augustus-gene-0.8-mRNA-1	exigua_EL1	exigua_egg	310.663	1538.38	924.522	-2.30776	0.184043	-12.5393	4.55253e-36	4.94899e-35
3	maker-tulip_contig_281_pilon_pilon-augustus-gene-3.0-mRNA-1	exigua_EL1	exigua_egg	2737.22	572.813	1655.02	2.25762	0.180052	12.5387	4.58469e-36	4.97477e-35
1	augustus_masked-tulip_contig_807_pilon_pilon-processed-gene-3.101-mRNA-1	exigua_EL1	exigua_egg	83.5871	464.155	273.871	-2.47307	0.197364	-12.5305	5.0842e-36	5.50663e-35
8	maker-tulip_contig_39_pilon_pilon-augustus-gene-1.71-mRNA-1	exigua_EL1	exigua_egg	63.8911	906.242	485.066	-3.82768	0.305606	-12.5249	5.45572e-36	5.89818e-35
5	maker-tulip_contig_674_pilon_pilon-augustus-gene-7.37-mRNA-1	exigua_EL1	exigua_egg	279.698	11.9235	145.811	4.57335	0.365334	12.5183	5.93101e-36	6.40615e-35
1	maker-tulip_contig_759_pilon_pilon-augustus-gene-1.138-mRNA-1	exigua_EL1	exigua_egg	241.624	8.81507	125.22	4.77479	0.381556	12.514	6.25992e-36	6.75521e-35
3	maker-tulip_contig_22_pilon_pilon-augustus-gene-0.7-mRNA-1	exigua_EL1	exigua_egg	290.472	15.9154	153.194	4.21027	0.336501	12.5119	6.42657e-36	6.9287e-35
1	maker-tulip_contig_121_pilon_pilon-augustus-gene-3.4-mRNA-1	exigua_EL1	exigua_egg	149.161	743.938	446.55	-2.31826	0.18529	-12.5115	6.45562e-36	6.95366e-35
3	maker-tulip_contig_525_pilon_pilon-augustus-gene-2.24-mRNA-1	exigua_EL1	exigua_egg	489.418	4.78649	247.102	6.7188	0.537399	12.5025	7.23761e-36	7.78886e-35
1	augustus_masked-tulip_contig_323_pilon_pilon-processed-gene-2.36-mRNA-1	exigua_EL1	exigua_egg	1467.56	79.8749	773.719	4.19469	0.335626	12.4981	7.64567e-36	8.22049e-35
7	maker-tulip_contig_855_pilon_pilon-augustus-gene-3.18-mRNA-1	exigua_EL1	exigua_egg	24.5676	287.402	155.985	-3.54668	0.284085	-12.4846	9.06128e-36	9.73364e-35
1	augustus_masked-tulip_contig_498_pilon_pilon-processed-gene-0.111-mRNA-1	exigua_EL1	exigua_egg	84.1488	454.915	269.532	-2.43347	0.194929	-12.4838	9.14648e-36	9.81622e-35
8	augustus_masked-tulip_contig_81_pilon_pilon-processed-gene-5.0-mRNA-1	exigua_EL1	exigua_egg	5.43603	221.854	113.645	-5.3415	0.427887	-12.4834	9.1938e-36	9.85803e-35
1	maker-tulip_contig_126_pilon_pilon-augustus-gene-2.227-mRNA-1	exigua_EL1	exigua_egg	200.908	1073.12	637.013	-2.41652	0.193656	-12.4784	9.79301e-36	1.0491e-34
1	maker-tulip_contig_211_pilon_pilon-augustus-gene-0.24-mRNA-1	exigua_EL1	exigua_egg	101.786	482.398	292.092	-2.24356	0.179875	-12.4729	1.04895e-35	1.12269e-34
1	maker-tulip_contig_74_pilon_pilon-augustus-gene-0.48-mRNA-1	exigua_EL1	exigua_egg	457.823	84.5095	271.166	2.4358	0.195321	12.4707	1.07872e-35	1.15351e-34
3	augustus_masked-tulip_contig_331_pilon_pilon-processed-gene-3.13-mRNA-1	exigua_EL1	exigua_egg	356.384	21.2928	188.838	4.08068	0.327229	12.4704	1.08236e-35	1.15635e-34
6	maker-tulip_contig_839_pilon_pilon-augustus-gene-1.41-mRNA-1	exigua_EL1	exigua_egg	8566.81	0	4283.4	15.4207	1.2377	12.4592	1.24657e-35	1.32697e-34
11	maker-tulip_contig_855_pilon_pilon-augustus-gene-3.42-mRNA-1	exigua_EL1	exigua_egg	280.824	8367.39	4324.11	-4.89693	0.393104	-12.4571	1.27967e-35	1.36098e-34
1	augustus_masked-tulip_contig_407_pilon_pilon-processed-gene-3.68-mRNA-1	exigua_EL1	exigua_egg	289.838	29.065	159.451	3.31087	0.265996	12.4471	1.45053e-35	1.53992e-34
1	maker-tulip_contig_362_pilon_pilon-augustus-gene-7.22-mRNA-1	exigua_EL1	exigua_egg	459.413	2.9397	231.177	7.33671	0.589511	12.4454	1.48123e-35	1.57109e-34
1	maker-tulip_contig_372_pilon_pilon-augustus-gene-1.113-mRNA-1	exigua_EL1	exigua_egg	336.569	1790.45	1063.51	-2.41117	0.19379	-12.4422	1.54268e-35	1.6348e-34
1	maker-tulip_contig_691_pilon_pilon-augustus-gene-0.13-mRNA-1	exigua_EL1	exigua_egg	72.1665	421.918	247.042	-2.54767	0.204785	-12.4407	1.5709e-35	1.6632e-34
1	maker-tulip_contig_597_pilon_pilon-augustus-gene-3.4-mRNA-1	exigua_EL1	exigua_egg	107.729	702.258	404.993	-2.70379	0.217564	-12.4276	1.85212e-35	1.9592e-34
5	maker-tulip_contig_441_pilon_pilon-augustus-gene-0.6-mRNA-1	exigua_EL1	exigua_egg	1549.14	23.9416	786.541	6.01975	0.485211	12.4065	2.41088e-35	2.54568e-34
-	maker-tulip_contig_806_pilon_pilon-augustus-gene-2.20-mRNA-1	exigua_EL1	exigua_egg	17.3839	801.15	409.267	-5.52763	0.445555	-12.4062	2.4199e-35	2.55292e-34
1	maker-tulip_contig_623_pilon_pilon-augustus-gene-1.13-mRNA-1	exigua_EL1	exigua_egg	123.172	517.979	320.576	-2.07233	0.167074	-12.4037	2.49598e-35	2.63083e-34
5	augustus_masked-tulip_contig_460_pilon_pilon-processed-gene-0.13-mRNA-1	exigua_EL1	exigua_egg	249.908	22.4573	136.182	3.48406	0.281004	12.3986	2.65801e-35	2.79411e-34
3	maker-tulip_contig_86_pilon_pilon-augustus-gene-0.25-mRNA-1	exigua_EL1	exigua_egg	3856.55	374.854	2115.7	3.36434	0.271382	12.3971	2.71103e-35	2.84731e-34
5	maker-tulip_contig_514_pilon_pilon-augustus-gene-0.11-mRNA-1	exigua_EL1	exigua_egg	343.024	22.6609	182.843	3.93306	0.317279	12.3962	2.7391e-35	2.87423e-34
1	augustus_masked-tulip_contig_3_pilon_pilon-processed-gene-3.5-mRNA-1	exigua_EL1	exigua_egg	398.535	2.84088	200.688	7.13876	0.576368	12.3858	3.12096e-35	3.27201e-34
12	maker-tulip_contig_807_pilon_pilon-augustus-gene-3.68-mRNA-1	exigua_EL1	exigua_egg	10.1146	360.756	185.435	-5.1614	0.416928	-12.3796	3.37075e-35	3.53075e-34
1	maker-tulip_contig_121_pilon_pilon-augustus-gene-1.8-mRNA-1	exigua_EL1	exigua_egg	483.33	2.07535	242.703	7.83533	0.633293	12.3724	3.68802e-35	3.85281e-34
1	augustus_masked-tulip_contig_473_pilon_pilon-processed-gene-1.5-mRNA-1	exigua_EL1	exigua_egg	158.868	720.043	439.455	-2.17991	0.176407	-12.3573	4.44961e-35	4.64431e-34
1	augustus_masked-tulip_contig_290_pilon_pilon-processed-gene-5.73-mRNA-1	exigua_EL1	exigua_egg	256.007	1095.7	675.852	-2.09727	0.169786	-12.3524	4.72734e-35	4.92982e-34
1	maker-tulip_contig_75_pilon_pilon-augustus-gene-1.5-mRNA-1	exigua_EL1	exigua_egg	285.01	29.3249	157.167	3.29062	0.266433	12.3506	4.83231e-35	5.03483e-34
1	maker-tulip_contig_441_pilon_pilon-augustus-gene-7.14-mRNA-1	exigua_EL1	exigua_egg	1242.57	172.559	707.566	2.85109	0.230883	12.3487	4.95305e-35	5.15607e-34
1	maker-tulip_contig_85_pilon_pilon-augustus-gene-1.21-mRNA-1	exigua_EL1	exigua_egg	446.067	46.0385	246.053	3.27748	0.265415	12.3485	4.96319e-35	5.16207e-34
3	augustus_masked-tulip_contig_402_pilon_pilon-processed-gene-2.12-mRNA-1	exigua_EL1	exigua_egg	516.392	39.8813	278.137	3.68516	0.298521	12.3447	5.19978e-35	5.40337e-34
1	maker-tulip_contig_344_pilon_pilon-augustus-gene-0.0-mRNA-1	exigua_EL1	exigua_egg	39.466	450.886	245.176	-3.51316	0.284752	-12.3376	5.68137e-35	5.89862e-34
4	maker-tulip_contig_69_pilon_pilon-augustus-gene-2.0-mRNA-1	exigua_EL1	exigua_egg	787.115	1.84679	394.481	8.79337	0.713205	12.3294	6.29428e-35	6.51773e-34
5	maker-tulip_contig_80_pilon_pilon-augustus-gene-0.136-mRNA-1	exigua_EL1	exigua_egg	249.16	6.66995	127.915	5.2161	0.423071	12.3291	6.31211e-35	6.52941e-34
3	maker-tulip_contig_531_pilon_pilon-augustus-gene-6.7-mRNA-1	exigua_EL1	exigua_egg	33166	2147.42	17656.7	3.94926	0.320321	12.3291	6.31664e-35	6.52941e-34
1	maker-tulip_contig_576_pilon_pilon-augustus-gene-0.1-mRNA-1	exigua_EL1	exigua_egg	80.9467	673.955	377.451	-3.05815	0.248072	-12.3277	6.42488e-35	6.62967e-34
1	maker-tulip_contig_76_pilon_pilon-augustus-gene-0.13-mRNA-1	exigua_EL1	exigua_egg	17.8536	353.377	185.615	-4.30295	0.349736	-12.3034	8.68352e-35	8.95246e-34
1	maker-tulip_contig_360_pilon_pilon-augustus-gene-1.37-mRNA-1	exigua_EL1	exigua_egg	29.1812	272.915	151.048	-3.22457	0.262118	-12.3019	8.84155e-35	9.10741e-34
5	augustus_masked-tulip_contig_37_pilon_pilon-processed-gene-3.8-mRNA-1	exigua_EL1	exigua_egg	925.201	74.0913	499.646	3.64221	0.296171	12.2976	9.32551e-35	9.58917e-34
5	maker-tulip_contig_490_pilon_pilon-augustus-gene-2.49-mRNA-1	exigua_EL1	exigua_egg	588.348	41.7794	315.064	3.82479	0.311255	12.2883	1.04716e-34	1.07583e-33
1	augustus_masked-tulip_contig_209_pilon_pilon-processed-gene-0.30-mRNA-1	exigua_EL1	exigua_egg	13.3452	231.233	122.289	-4.11093	0.334639	-12.2847	1.09449e-34	1.12347e-33
5	maker-tulip_contig_407_pilon_pilon-augustus-gene-9.158-mRNA-1	exigua_EL1	exigua_egg	235.816	11.4697	123.643	4.34591	0.354258	12.2676	1.35121e-34	1.38458e-33
5	maker-tulip_contig_465_pilon_pilon-augustus-gene-0.67-mRNA-1	exigua_EL1	exigua_egg	486.264	2.01134	244.138	7.84751	0.639784	12.2659	1.38104e-34	1.41392e-33
1	maker-tulip_contig_181_pilon_pilon-augustus-gene-0.23-mRNA-1	exigua_EL1	exigua_egg	139.073	697.633	418.353	-2.32621	0.189655	-12.2655	1.38819e-34	1.42e-33
-	maker-tulip_contig_361_pilon_pilon-augustus-gene-1.73-mRNA-1	exigua_EL1	exigua_egg	93.6998	480.604	287.152	-2.35934	0.192443	-12.2599	1.48671e-34	1.51947e-33
6	maker-tulip_contig_110_pilon_pilon-augustus-gene-2.16-mRNA-1	exigua_EL1	exigua_egg	4935.05	0	2467.52	14.6251	1.19352	12.2537	1.60529e-34	1.63923e-33
5	maker-tulip_contig_831_pilon_pilon-augustus-gene-0.92-mRNA-1	exigua_EL1	exigua_egg	272.892	29.2045	151.048	3.22096	0.26287	12.2531	1.61779e-34	1.65056e-33
5	maker-tulip_contig_58_pilon_pilon-augustus-gene-4.16-mRNA-1	exigua_EL1	exigua_egg	4729.24	0	2364.62	14.5636	1.18895	12.2491	1.69804e-34	1.73094e-33
1	maker-tulip_contig_855_pilon_pilon-augustus-gene-2.13-mRNA-1	exigua_EL1	exigua_egg	261.717	3.79411	132.756	6.07808	0.496588	12.2397	1.9076e-34	1.94289e-33
5	maker-tulip_contig_33_pilon_pilon-augustus-gene-3.35-mRNA-1	exigua_EL1	exigua_egg	662.457	121.543	392	2.4477	0.200049	12.2355	2.00866e-34	2.04405e-33
4	maker-tulip_contig_740_pilon_pilon-augustus-gene-1.6-mRNA-1	exigua_EL1	exigua_egg	9185.41	0.333281	4592.87	14.5595	1.19074	12.2273	2.22149e-34	2.25867e-33
1	maker-tulip_contig_281_pilon_pilon-augustus-gene-3.24-mRNA-1	exigua_EL1	exigua_egg	7.85835	275.448	141.653	-5.12523	0.419426	-12.2196	2.44147e-34	2.4802e-33
1	maker-tulip_contig_512_pilon_pilon-augustus-gene-0.30-mRNA-1	exigua_EL1	exigua_egg	41.424	338.517	189.971	-3.03114	0.248113	-12.2168	2.52953e-34	2.56744e-33
6	maker-tulip_contig_125_pilon_pilon-augustus-gene-0.101-mRNA-1	exigua_EL1	exigua_egg	5500.23	0	2750.12	14.7815	1.21054	12.2107	2.7257e-34	2.75942e-33
1	maker-tulip_contig_491_pilon_pilon-augustus-gene-0.25-mRNA-1	exigua_EL1	exigua_egg	2836.09	668.699	1752.39	2.08415	0.170701	12.2094	2.77069e-34	2.80256e-33
1	maker-tulip_contig_6_pilon_pilon-augustus-gene-0.6-mRNA-1	exigua_EL1	exigua_egg	546.078	45.5337	295.806	3.57652	0.293406	12.1896	3.5294e-34	3.56388e-33
3	maker-tulip_contig_673_pilon_pilon-augustus-gene-2.0-mRNA-1	exigua_EL1	exigua_egg	249.422	11.557	130.489	4.42312	0.362866	12.1894	3.54127e-34	3.57281e-33
3	maker-tulip_contig_426_pilon_pilon-augustus-gene-1.58-mRNA-1	exigua_EL1	exigua_egg	397.595	73.7121	235.654	2.43025	0.199437	12.1855	3.71227e-34	3.74212e-33
1	maker-tulip_contig_145_pilon_pilon-augustus-gene-6.12-mRNA-1	exigua_EL1	exigua_egg	418.975	51.3576	235.166	3.02949	0.248887	12.1721	4.37562e-34	4.40327e-33
1	maker-tulip_contig_909_pilon_pilon-augustus-gene-0.16-mRNA-1	exigua_EL1	exigua_egg	111.906	528.623	320.265	-2.24074	0.184125	-12.1696	4.5108e-34	4.53368e-33
6	maker-tulip_contig_1_pilon_pilon-augustus-gene-2.11-mRNA-1	exigua_EL1	exigua_egg	1565.15	1.07551	783.11	10.5276	0.865072	12.1696	4.5129e-34	4.53368e-33
8	augustus_masked-tulip_contig_677_pilon_pilon-processed-gene-1.92-mRNA-1	exigua_EL1	exigua_egg	3.00308	255.345	129.174	-6.39288	0.525332	-12.1692	4.53439e-34	4.55138e-33
1	maker-tulip_contig_505_pilon_pilon-augustus-gene-0.0-mRNA-1	exigua_EL1	exigua_egg	36.6579	373.052	204.855	-3.34469	0.274872	-12.1682	4.59365e-34	4.60695e-33
1	augustus_masked-tulip_contig_711_pilon_pilon-processed-gene-0.4-mRNA-1	exigua_EL1	exigua_egg	73.8192	444.912	259.366	-2.59227	0.213114	-12.1638	4.84569e-34	4.85558e-33
5	augustus_masked-tulip_contig_429_pilon_pilon-processed-gene-3.8-mRNA-1	exigua_EL1	exigua_egg	244.155	13.5725	128.864	4.1794	0.34363	12.1625	4.9225e-34	4.92835e-33
1	augustus_masked-tulip_contig_199_pilon_pilon-processed-gene-2.30-mRNA-1	exigua_EL1	exigua_egg	84.2463	475.433	279.839	-2.49614	0.205234	-12.1624	4.92766e-34	4.92934e-33
5	maker-tulip_contig_145_pilon_pilon-augustus-gene-2.47-mRNA-1	exigua_EL1	exigua_egg	224.453	5.2029	114.828	5.40885	0.444782	12.1607	5.03355e-34	5.03099e-33
1	maker-tulip_contig_378_pilon_pilon-augustus-gene-2.32-mRNA-1	exigua_EL1	exigua_egg	149.759	837.393	493.576	-2.48271	0.204287	-12.153	5.5274e-34	5.51523e-33
3	maker-tulip_contig_819_pilon_pilon-augustus-gene-0.22-mRNA-1	exigua_EL1	exigua_egg	645.135	36.6899	340.912	4.12698	0.339706	12.1487	5.82947e-34	5.81172e-33
5	augustus_masked-tulip_contig_248_pilon_pilon-processed-gene-0.8-mRNA-1	exigua_EL1	exigua_egg	382.008	64.4664	223.237	2.5619	0.210924	12.1461	6.01697e-34	5.99358e-33
3	augustus_masked-tulip_contig_362_pilon_pilon-processed-gene-6.33-mRNA-1	exigua_EL1	exigua_egg	500.196	1.78278	250.989	8.14524	0.670623	12.1458	6.04055e-34	6.01198e-33
1	maker-tulip_contig_623_pilon_pilon-augustus-gene-5.48-mRNA-1	exigua_EL1	exigua_egg	323.098	4.30778	163.703	6.24762	0.514436	12.1446	6.128e-34	6.09387e-33
5	augustus_masked-tulip_contig_281_pilon_pilon-processed-gene-2.33-mRNA-1	exigua_EL1	exigua_egg	4345.56	0	2172.78	14.4415	1.1919	12.1164	8.64298e-34	8.57313e-33
8	augustus_masked-tulip_contig_555_pilon_pilon-processed-gene-0.6-mRNA-1	exigua_EL1	exigua_egg	66.4365	540.112	303.274	-3.02135	0.249401	-12.1144	8.86162e-34	8.78261e-33
1	maker-tulip_contig_515_pilon_pilon-augustus-gene-2.8-mRNA-1	exigua_EL1	exigua_egg	75.6583	547.816	311.737	-2.85637	0.235801	-12.1135	8.962e-34	8.87464e-33
1	maker-tulip_contig_448_pilon_pilon-augustus-gene-0.53-mRNA-1	exigua_EL1	exigua_egg	63.6761	363.521	213.598	-2.5135	0.207621	-12.1062	9.79268e-34	9.68908e-33
1	maker-tulip_contig_376_pilon_pilon-augustus-gene-0.15-mRNA-1	exigua_EL1	exigua_egg	2475.47	13186.6	7831.01	-2.41328	0.199449	-12.0997	1.05941e-33	1.04556e-32
1	maker-tulip_contig_194_pilon_pilon-augustus-gene-1.15-mRNA-1	exigua_EL1	exigua_egg	275.03	38.0062	156.518	2.85964	0.236345	12.0994	1.06329e-33	1.04851e-32
3	maker-tulip_contig_208_pilon_pilon-augustus-gene-1.108-mRNA-1	exigua_EL1	exigua_egg	351.861	61.6646	206.763	2.51096	0.207564	12.0972	1.09212e-33	1.07426e-32
1	maker-tulip_contig_360_pilon_pilon-augustus-gene-2.65-mRNA-1	exigua_EL1	exigua_egg	864.28	92.9841	478.632	3.21214	0.26559	12.0943	1.13153e-33	1.11209e-32
4	augustus_masked-tulip_contig_82_pilon_pilon-processed-gene-1.17-mRNA-1	exigua_EL1	exigua_egg	4164.45	0	2082.23	14.3801	1.18995	12.0846	1.27334e-33	1.24938e-32
1	augustus_masked-tulip_contig_424_pilon_pilon-processed-gene-0.106-mRNA-1	exigua_EL1	exigua_egg	116.179	746.968	431.574	-2.68471	0.222214	-12.0816	1.32089e-33	1.29388e-32
1	augustus_masked-tulip_contig_148_pilon_pilon-processed-gene-0.66-mRNA-1	exigua_EL1	exigua_egg	688.961	30.4348	359.698	4.49104	0.37185	12.0775	1.38803e-33	1.35835e-32
1	maker-tulip_contig_623_pilon_pilon-augustus-gene-5.133-mRNA-1	exigua_EL1	exigua_egg	1067.59	199.212	633.402	2.42377	0.200685	12.0775	1.38901e-33	1.35835e-32
8	maker-tulip_contig_414_pilon_pilon-augustus-gene-0.14-mRNA-1	exigua_EL1	exigua_egg	2.12867	764.738	383.433	-8.4884	0.703319	-12.0691	1.53883e-33	1.50361e-32
6	maker-tulip_contig_870_pilon_pilon-augustus-gene-2.4-mRNA-1	exigua_EL1	exigua_egg	4958	0	2479	14.6318	1.21332	12.0593	1.73248e-33	1.69143e-32
-	maker-tulip_contig_72_pilon_pilon-augustus-gene-2.22-mRNA-1	exigua_EL1	exigua_egg	708.302	1.35643	354.829	8.9711	0.744091	12.0564	1.79352e-33	1.74813e-32
3	maker-tulip_contig_169_pilon_pilon-augustus-gene-0.23-mRNA-1	exigua_EL1	exigua_egg	3230.72	54.1724	1642.44	5.90376	0.489994	12.0486	1.97187e-33	1.92037e-32
1	maker-tulip_contig_870_pilon_pilon-augustus-gene-4.131-mRNA-1	exigua_EL1	exigua_egg	156.73	1580.2	868.465	-3.33286	0.276737	-12.0434	2.10097e-33	2.04273e-32
1	maker-tulip_contig_356_pilon_pilon-augustus-gene-1.44-mRNA-1	exigua_EL1	exigua_egg	423.739	48.2453	235.992	3.12889	0.259891	12.0392	2.20999e-33	2.14695e-32
3	maker-tulip_contig_586_pilon_pilon-augustus-gene-1.5-mRNA-1	exigua_EL1	exigua_egg	3844.7	0.771283	1922.74	12.4085	1.03105	12.0349	2.32926e-33	2.26095e-32
1	augustus_masked-tulip_contig_465_pilon_pilon-processed-gene-0.107-mRNA-1	exigua_EL1	exigua_egg	184.645	870.89	527.768	-2.23754	0.185925	-12.0347	2.3355e-33	2.26515e-32
1	maker-tulip_contig_181_pilon_pilon-augustus-gene-0.13-mRNA-1	exigua_EL1	exigua_egg	304.624	6.6409	155.633	5.50836	0.458395	12.0166	2.90626e-33	2.8164e-32
1	augustus_masked-tulip_contig_653_pilon_pilon-processed-gene-0.160-mRNA-1	exigua_EL1	exigua_egg	103.16	612.874	358.017	-2.57119	0.213972	-12.0165	2.91036e-33	2.81805e-32
3	maker-tulip_contig_441_pilon_pilon-augustus-gene-5.43-mRNA-1	exigua_EL1	exigua_egg	2503.78	203.013	1353.4	3.62643	0.30207	12.0053	3.33358e-33	3.22255e-32
5	maker-tulip_contig_318_pilon_pilon-augustus-gene-3.16-mRNA-1	exigua_EL1	exigua_egg	403.822	16.7907	210.307	4.56716	0.380449	12.0046	3.35936e-33	3.24481e-32
1	maker-tulip_contig_159_pilon_pilon-augustus-gene-2.22-mRNA-1	exigua_EL1	exigua_egg	60.2454	491.914	276.08	-3.02858	0.252324	-12.0027	3.43789e-33	3.31794e-32
5	maker-tulip_contig_623_pilon_pilon-augustus-gene-5.30-mRNA-1	exigua_EL1	exigua_egg	459.823	10.1117	234.968	5.52342	0.460338	11.9986	3.61268e-33	3.48378e-32
1	maker-tulip_contig_868_pilon_pilon-augustus-gene-0.50-mRNA-1	exigua_EL1	exigua_egg	407.874	1956.95	1182.41	-2.26278	0.188804	-11.9848	4.26964e-33	4.11057e-32
1	augustus_masked-tulip_contig_138_pilon_pilon-processed-gene-0.2-mRNA-1	exigua_EL1	exigua_egg	9535.08	1872.75	5703.91	2.34842	0.195986	11.9826	4.38554e-33	4.21872e-32
1	maker-tulip_contig_15_pilon_pilon-augustus-gene-2.35-mRNA-1	exigua_EL1	exigua_egg	427.533	3039.14	1733.34	-2.8294	0.236137	-11.982	4.41521e-33	4.24379e-32
5	maker-tulip_contig_537_pilon_pilon-augustus-gene-3.6-mRNA-1	exigua_EL1	exigua_egg	5138.92	8.21656	2573.57	9.30993	0.777161	11.9794	4.5558e-33	4.37535e-32
6	maker-tulip_contig_125_pilon_pilon-augustus-gene-0.100-mRNA-1	exigua_EL1	exigua_egg	4596.04	0	2298.02	14.5224	1.21299	11.9723	4.96077e-33	4.7604e-32
10	maker-tulip_contig_753_pilon_pilon-augustus-gene-0.12-mRNA-1	exigua_EL1	exigua_egg	368.241	5.16048	186.701	6.20087	0.518681	11.9551	6.10802e-33	5.84228e-32
1	maker-tulip_contig_345_pilon_pilon-augustus-gene-1.64-mRNA-1	exigua_EL1	exigua_egg	524.194	22.2269	273.21	4.57688	0.383015	11.9496	6.52275e-33	6.23391e-32
1	maker-tulip_contig_628_pilon_pilon-augustus-gene-0.17-mRNA-1	exigua_EL1	exigua_egg	216.835	891.258	554.047	-2.04005	0.170749	-11.9477	6.67598e-33	6.37518e-32
1	maker-tulip_contig_673_pilon_pilon-augustus-gene-1.67-mRNA-1	exigua_EL1	exigua_egg	3478.42	718.646	2098.53	2.27593	0.190553	11.9438	6.99586e-33	6.67524e-32
1	maker-tulip_contig_505_pilon_pilon-augustus-gene-0.8-mRNA-1	exigua_EL1	exigua_egg	32.1275	334.476	183.302	-3.38307	0.283323	-11.9407	7.26056e-33	6.91661e-32
1	augustus_masked-tulip_contig_360_pilon_pilon-processed-gene-1.3-mRNA-1	exigua_EL1	exigua_egg	182.487	1146.76	664.624	-2.65077	0.222067	-11.9368	7.60764e-33	7.22972e-32
1	maker-tulip_contig_287_pilon_pilon-augustus-gene-0.12-mRNA-1	exigua_EL1	exigua_egg	259.521	3.57146	131.546	6.19692	0.519343	11.9322	8.03927e-33	7.63374e-32
5	augustus_masked-tulip_contig_441_pilon_pilon-processed-gene-4.15-mRNA-1	exigua_EL1	exigua_egg	3798.96	0	1899.48	14.2476	1.19438	11.9288	8.37251e-33	7.93101e-32
3	maker-tulip_contig_732_pilon_pilon-augustus-gene-5.6-mRNA-1	exigua_EL1	exigua_egg	204.866	14.2855	109.576	3.85293	0.323023	11.9277	8.48551e-33	8.03158e-32
1	maker-tulip_contig_378_pilon_pilon-augustus-gene-2.5-mRNA-1	exigua_EL1	exigua_egg	68.2849	429.691	248.988	-2.65422	0.222611	-11.9232	8.96447e-33	8.47812e-32
5	augustus_masked-tulip_contig_211_pilon_pilon-processed-gene-1.2-mRNA-1	exigua_EL1	exigua_egg	267.401	20.2849	143.843	3.71232	0.311609	11.9134	1.008e-32	9.51787e-32
1	maker-tulip_contig_168_pilon_pilon-augustus-gene-1.8-mRNA-1	exigua_EL1	exigua_egg	591.294	29.2005	310.247	4.33192	0.363621	11.9133	1.00893e-32	9.51898e-32
1	maker-tulip_contig_372_pilon_pilon-augustus-gene-1.12-mRNA-1	exigua_EL1	exigua_egg	73.0198	613.966	343.493	-3.07282	0.25813	-11.9042	1.12562e-32	1.06114e-31
3	augustus_masked-tulip_contig_237_pilon_pilon-processed-gene-0.6-mRNA-1	exigua_EL1	exigua_egg	1003.41	136.027	569.721	2.88156	0.242111	11.9019	1.15743e-32	1.09026e-31
1	maker-tulip_contig_759_pilon_pilon-augustus-gene-1.61-mRNA-1	exigua_EL1	exigua_egg	266.847	5.87941	136.363	5.54731	0.466135	11.9007	1.17413e-32	1.10511e-31
1	maker-tulip_contig_555_pilon_pilon-augustus-gene-2.44-mRNA-1	exigua_EL1	exigua_egg	103.364	549.415	326.39	-2.40899	0.202475	-11.8977	1.21581e-32	1.14343e-31
1	augustus_masked-tulip_contig_33_pilon_pilon-processed-gene-1.0-mRNA-1	exigua_EL1	exigua_egg	437.411	1887.83	1162.62	-2.11009	0.177432	-11.8924	1.29572e-32	1.21761e-31
1	maker-tulip_contig_43_pilon_pilon-augustus-gene-5.14-mRNA-1	exigua_EL1	exigua_egg	77.3546	481.996	279.675	-2.639	0.221947	-11.8902	1.33009e-32	1.24891e-31
1	maker-tulip_contig_485_pilon_pilon-augustus-gene-0.63-mRNA-1	exigua_EL1	exigua_egg	311.066	1364.29	837.677	-2.13237	0.179378	-11.8876	1.37346e-32	1.2886e-31
3	maker-tulip_contig_827_pilon_pilon-augustus-gene-2.92-mRNA-1	exigua_EL1	exigua_egg	571.473	42.8853	307.179	3.73008	0.313928	11.882	1.46867e-32	1.37684e-31
3	maker-tulip_contig_192_pilon_pilon-augustus-gene-1.78-mRNA-1	exigua_EL1	exigua_egg	4006.65	646.888	2326.77	2.63059	0.221498	11.8764	1.57075e-32	1.47136e-31
1	maker-tulip_contig_519_pilon_pilon-augustus-gene-2.25-mRNA-1	exigua_EL1	exigua_egg	114.824	543.638	329.231	-2.24285	0.188854	-11.8761	1.57458e-32	1.47378e-31
1	augustus_masked-tulip_contig_351_pilon_pilon-processed-gene-1.112-mRNA-1	exigua_EL1	exigua_egg	10.9619	211.105	111.034	-4.26888	0.359463	-11.8757	1.58253e-32	1.48004e-31
5	maker-tulip_contig_654_pilon_pilon-augustus-gene-1.116-mRNA-1	exigua_EL1	exigua_egg	812.918	135.887	474.403	2.58204	0.217586	11.8668	1.76159e-32	1.6462e-31
3	maker-tulip_contig_80_pilon_pilon-augustus-gene-0.102-mRNA-1	exigua_EL1	exigua_egg	1140.17	1.0522	570.612	10.0716	0.848903	11.8642	1.81638e-32	1.69605e-31
1	maker-tulip_contig_181_pilon_pilon-augustus-gene-0.26-mRNA-1	exigua_EL1	exigua_egg	229.345	26.8192	128.082	3.09535	0.26092	11.8632	1.83796e-32	1.71484e-31
5	maker-tulip_contig_837_pilon_pilon-augustus-gene-7.23-mRNA-1	exigua_EL1	exigua_egg	349.734	57.4383	203.586	2.60435	0.21957	11.8612	1.88351e-32	1.75596e-31
1	maker-tulip_contig_323_pilon_pilon-augustus-gene-8.68-mRNA-1	exigua_EL1	exigua_egg	1447.9	275.183	861.542	2.39767	0.202306	11.8517	2.10883e-32	1.96291e-31
1	maker-tulip_contig_72_pilon_pilon-augustus-gene-0.48-mRNA-1	exigua_EL1	exigua_egg	107.24	538.064	322.652	-2.32566	0.196377	-11.8428	2.34517e-32	2.17945e-31
-	maker-tulip_contig_288_pilon_pilon-augustus-gene-1.27-mRNA-1	exigua_EL1	exigua_egg	726.564	3781.8	2254.18	-2.38014	0.200981	-11.8426	2.35032e-32	2.18251e-31
5	augustus_masked-tulip_contig_529_pilon_pilon-processed-gene-1.54-mRNA-1	exigua_EL1	exigua_egg	207.478	4.95694	106.217	5.38993	0.45544	11.8345	2.58764e-32	2.401e-31
3	augustus_masked-tulip_contig_81_pilon_pilon-processed-gene-5.7-mRNA-1	exigua_EL1	exigua_egg	257.702	5.55949	131.631	5.51617	0.466476	11.8252	2.89245e-32	2.68172e-31
1	maker-tulip_contig_421_pilon_pilon-augustus-gene-0.0-mRNA-1	exigua_EL1	exigua_egg	60.2171	478.091	269.154	-2.98854	0.252841	-11.8198	3.08365e-32	2.85674e-31
6	augustus_masked-tulip_contig_465_pilon_pilon-processed-gene-0.138-mRNA-1	exigua_EL1	exigua_egg	3496.7	0	1748.35	14.1279	1.19606	11.8121	3.38204e-32	3.13071e-31
-	maker-tulip_contig_841_pilon_pilon-augustus-gene-0.83-mRNA-1	exigua_EL1	exigua_egg	191.174	9.83822	100.506	4.27449	0.361884	11.8118	3.39332e-32	3.13869e-31
1	maker-tulip_contig_895_pilon_pilon-augustus-gene-3.22-mRNA-1	exigua_EL1	exigua_egg	2922.96	458.94	1690.95	2.67205	0.226244	11.8105	3.44661e-32	3.18298e-31
5	augustus_masked-tulip_contig_107_pilon_pilon-processed-gene-0.20-mRNA-1	exigua_EL1	exigua_egg	228.744	3.5365	116.14	6.0166	0.509622	11.806	3.63397e-32	3.35339e-31
1	maker-tulip_contig_375_pilon_pilon-augustus-gene-1.14-mRNA-1	exigua_EL1	exigua_egg	2121.77	290.865	1206.32	2.86682	0.242899	11.8025	3.78823e-32	3.49299e-31
3	maker-tulip_contig_674_pilon_pilon-augustus-gene-8.55-mRNA-1	exigua_EL1	exigua_egg	319.783	3.90474	161.844	6.36087	0.539175	11.7974	4.0251e-32	3.7056e-31
1	maker-tulip_contig_847_pilon_pilon-augustus-gene-0.9-mRNA-1	exigua_EL1	exigua_egg	224.542	4.86962	114.706	5.50889	0.46697	11.7971	4.03963e-32	3.71608e-31
1	maker-tulip_contig_44_pilon_pilon-augustus-gene-6.38-mRNA-1	exigua_EL1	exigua_egg	1156.13	148.646	652.389	2.96243	0.25136	11.7856	4.63242e-32	4.25807e-31
3	maker-tulip_contig_608_pilon_pilon-augustus-gene-0.12-mRNA-1	exigua_EL1	exigua_egg	192.599	8.45273	100.526	4.50665	0.382483	11.7826	4.79844e-32	4.40724e-31
1	maker-tulip_contig_584_pilon_pilon-augustus-gene-2.16-mRNA-1	exigua_EL1	exigua_egg	3680.94	14823	9251.98	-2.00969	0.170626	-11.7783	5.04936e-32	4.63048e-31
1	maker-tulip_contig_603_pilon_pilon-augustus-gene-2.9-mRNA-1	exigua_EL1	exigua_egg	196.39	9.34614	102.868	4.41198	0.374741	11.7734	5.3522e-32	4.90438e-31
3	maker-tulip_contig_327_pilon_pilon-augustus-gene-5.9-mRNA-1	exigua_EL1	exigua_egg	273.253	3.07519	138.164	6.43086	0.546376	11.77	5.57045e-32	5.1004e-31
1	augustus_masked-tulip_contig_705_pilon_pilon-processed-gene-0.27-mRNA-1	exigua_EL1	exigua_egg	14.2668	194.648	104.457	-3.76878	0.320453	-11.7608	6.21402e-32	5.68525e-31
1	maker-tulip_contig_281_pilon_pilon-augustus-gene-3.41-mRNA-1	exigua_EL1	exigua_egg	226.541	954.193	590.367	-2.07478	0.176438	-11.7593	6.32753e-32	5.78461e-31
3	maker-tulip_contig_485_pilon_pilon-augustus-gene-0.33-mRNA-1	exigua_EL1	exigua_egg	183.548	6.75712	95.1526	4.77156	0.405919	11.7549	6.6608e-32	6.08457e-31
1	maker-tulip_contig_800_pilon_pilon-augustus-gene-1.27-mRNA-1	exigua_EL1	exigua_egg	145.546	594.021	369.783	-2.02942	0.172711	-11.7504	7.03203e-32	6.4187e-31
6	maker-tulip_contig_110_pilon_pilon-augustus-gene-2.62-mRNA-1	exigua_EL1	exigua_egg	3205.95	0	1602.97	14.0028	1.19193	11.7479	7.23728e-32	6.60094e-31
5	augustus_masked-tulip_contig_474_pilon_pilon-processed-gene-1.93-mRNA-1	exigua_EL1	exigua_egg	224.559	17.2619	120.91	3.69864	0.31484	11.7477	7.25894e-32	6.61557e-31
1	maker-tulip_contig_636_pilon_pilon-augustus-gene-0.26-mRNA-1	exigua_EL1	exigua_egg	222.956	3.89309	113.425	5.84187	0.497799	11.7354	8.39324e-32	7.64343e-31
3	maker-tulip_contig_33_pilon_pilon-augustus-gene-4.25-mRNA-1	exigua_EL1	exigua_egg	3386.82	0.771283	1693.8	12.2241	1.04232	11.7279	9.17543e-32	8.34929e-31
3	augustus_masked-tulip_contig_424_pilon_pilon-processed-gene-0.107-mRNA-1	exigua_EL1	exigua_egg	426.305	16.3916	221.348	4.69247	0.400224	11.7246	9.53505e-32	8.66983e-31
5	maker-tulip_contig_333_pilon_pilon-augustus-gene-3.65-mRNA-1	exigua_EL1	exigua_egg	847.22	24.7073	435.964	5.10513	0.435455	11.7237	9.63976e-32	8.75828e-31
1	augustus_masked-tulip_contig_181_pilon_pilon-processed-gene-0.10-mRNA-1	exigua_EL1	exigua_egg	356.108	48.7588	202.434	2.86444	0.244534	11.7139	1.0823e-31	9.81817e-31
3	augustus_masked-tulip_contig_77_pilon_pilon-processed-gene-1.18-mRNA-1	exigua_EL1	exigua_egg	3063.38	0.771283	1532.08	12.0807	1.03151	11.7116	1.1116e-31	1.00685e-30
1	maker-tulip_contig_474_pilon_pilon-augustus-gene-0.84-mRNA-1	exigua_EL1	exigua_egg	390.805	55.9331	223.369	2.80922	0.240018	11.7042	1.21273e-31	1.09761e-30
1	maker-tulip_contig_413_pilon_pilon-augustus-gene-0.24-mRNA-1	exigua_EL1	exigua_egg	74.4034	535.089	304.746	-2.84487	0.243111	-11.7019	1.246e-31	1.12685e-30
3	augustus_masked-tulip_contig_716_pilon_pilon-processed-gene-1.0-mRNA-1	exigua_EL1	exigua_egg	777.161	157.9	467.53	2.29829	0.196441	11.6996	1.27993e-31	1.15665e-30
1	augustus_masked-tulip_contig_673_pilon_pilon-processed-gene-1.4-mRNA-1	exigua_EL1	exigua_egg	452.856	57.6152	255.236	2.98109	0.254811	11.6992	1.28627e-31	1.16149e-30
1	maker-tulip_contig_862_pilon_pilon-augustus-gene-1.57-mRNA-1	exigua_EL1	exigua_egg	755.709	81.0398	418.374	3.2273	0.275892	11.6977	1.30947e-31	1.18153e-30
3	maker-tulip_contig_674_pilon_pilon-augustus-gene-10.6-mRNA-1	exigua_EL1	exigua_egg	593.128	1.54257	297.335	8.7094	0.744813	11.6934	1.37771e-31	1.24121e-30
1	maker-tulip_contig_390_pilon_pilon-augustus-gene-0.8-mRNA-1	exigua_EL1	exigua_egg	94.0661	455.658	274.862	-2.27692	0.194736	-11.6923	1.3948e-31	1.25564e-30
3	maker-tulip_contig_773_pilon_pilon-augustus-gene-2.31-mRNA-1	exigua_EL1	exigua_egg	710.435	1.49021	355.962	8.96926	0.767149	11.6917	1.40599e-31	1.26475e-30
1	augustus_masked-tulip_contig_272_pilon_pilon-processed-gene-4.72-mRNA-1	exigua_EL1	exigua_egg	360.357	2.05795	181.207	7.41242	0.63404	11.6908	1.421e-31	1.2763e-30
1	augustus_masked-tulip_contig_420_pilon_pilon-processed-gene-2.25-mRNA-1	exigua_EL1	exigua_egg	194.3	845.07	519.685	-2.12069	0.181411	-11.69	1.43436e-31	1.28732e-30
5	augustus_masked-tulip_contig_283_pilon_pilon-processed-gene-3.18-mRNA-1	exigua_EL1	exigua_egg	344.113	15.0685	179.591	4.52442	0.387319	11.6814	1.58687e-31	1.42311e-30
3	augustus_masked-tulip_contig_839_pilon_pilon-processed-gene-1.7-mRNA-1	exigua_EL1	exigua_egg	277.659	2.78262	140.221	6.62056	0.566997	11.6765	1.68007e-31	1.50212e-30
1	maker-tulip_contig_247_pilon_pilon-augustus-gene-2.105-mRNA-1	exigua_EL1	exigua_egg	249.131	5.80389	127.467	5.45227	0.466992	11.6753	1.70434e-31	1.52266e-30
-	maker-tulip_contig_360_pilon_pilon-augustus-gene-2.30-mRNA-1	exigua_EL1	exigua_egg	409.088	4.49392	206.791	6.5678	0.562711	11.6717	1.77794e-31	1.58602e-30
1	augustus_masked-tulip_contig_190_pilon_pilon-processed-gene-2.31-mRNA-1	exigua_EL1	exigua_egg	77.5483	348.227	212.887	-2.16647	0.185678	-11.6679	1.86038e-31	1.6583e-30
1	maker-tulip_contig_59_pilon_pilon-augustus-gene-0.41-mRNA-1	exigua_EL1	exigua_egg	28.8302	396.327	212.579	-3.77873	0.32393	-11.6653	1.91743e-31	1.70786e-30
6	maker-tulip_contig_322_pilon_pilon-augustus-gene-0.3-mRNA-1	exigua_EL1	exigua_egg	3876.1	0	1938.05	14.2766	1.22392	11.6646	1.93217e-31	1.71969e-30
5	maker-tulip_contig_639_pilon_pilon-augustus-gene-0.29-mRNA-1	exigua_EL1	exigua_egg	6087.39	0.344933	3043.87	13.966	1.19736	11.664	1.94712e-31	1.73169e-30
1	maker-tulip_contig_909_pilon_pilon-augustus-gene-0.42-mRNA-1	exigua_EL1	exigua_egg	4325.64	957.808	2641.73	2.1757	0.186712	11.6527	2.22239e-31	1.97392e-30
5	augustus_masked-tulip_contig_168_pilon_pilon-processed-gene-1.32-mRNA-1	exigua_EL1	exigua_egg	406.095	33.8363	219.966	3.59564	0.308567	11.6527	2.22284e-31	1.97392e-30
1	maker-tulip_contig_628_pilon_pilon-augustus-gene-4.52-mRNA-1	exigua_EL1	exigua_egg	543.389	68.6435	306.016	2.99207	0.256851	11.6491	2.32e-31	2.05865e-30
1	maker-tulip_contig_59_pilon_pilon-augustus-gene-2.47-mRNA-1	exigua_EL1	exigua_egg	353.88	53.2835	203.582	2.7266	0.234074	11.6485	2.33663e-31	2.07029e-30
3	augustus_masked-tulip_contig_581_pilon_pilon-processed-gene-0.15-mRNA-1	exigua_EL1	exigua_egg	246.646	24.5967	135.621	3.33293	0.286205	11.6452	2.42644e-31	2.14825e-30
1	maker-tulip_contig_37_pilon_pilon-augustus-gene-1.10-mRNA-1	exigua_EL1	exigua_egg	366.81	2.19172	184.501	7.43124	0.63833	11.6417	2.52943e-31	2.23775e-30
1	maker-tulip_contig_519_pilon_pilon-augustus-gene-0.28-mRNA-1	exigua_EL1	exigua_egg	181.356	6.62334	93.9895	4.75966	0.408871	11.641	2.55077e-31	2.25493e-30
1	maker-tulip_contig_37_pilon_pilon-augustus-gene-0.21-mRNA-1	exigua_EL1	exigua_egg	645.647	62.4629	354.055	3.365	0.289084	11.6402	2.57336e-31	2.2732e-30
5	maker-tulip_contig_538_pilon_pilon-augustus-gene-0.59-mRNA-1	exigua_EL1	exigua_egg	237.393	12.6906	125.042	4.22365	0.362972	11.6363	2.69426e-31	2.37821e-30
1	maker-tulip_contig_446_pilon_pilon-augustus-gene-1.22-mRNA-1	exigua_EL1	exigua_egg	49.2378	1200.79	625.014	-4.60939	0.396179	-11.6346	2.74788e-31	2.42192e-30
1	augustus_masked-tulip_contig_70_pilon_pilon-processed-gene-0.72-mRNA-1	exigua_EL1	exigua_egg	223.51	1121.74	672.623	-2.32764	0.200193	-11.627	3.00544e-31	2.64694e-30
6	maker-tulip_contig_218_pilon_pilon-augustus-gene-0.97-mRNA-1	exigua_EL1	exigua_egg	2818.51	0	1409.25	13.8169	1.1884	11.6265	3.02135e-31	2.65897e-30
1	maker-tulip_contig_860_pilon_pilon-augustus-gene-6.20-mRNA-1	exigua_EL1	exigua_egg	249.243	25.4087	137.326	3.30463	0.284251	11.6258	3.04873e-31	2.68107e-30
1	maker-tulip_contig_54_pilon_pilon-augustus-gene-1.13-mRNA-1	exigua_EL1	exigua_egg	241.99	14.4078	128.199	4.08675	0.351757	11.6181	3.33526e-31	2.93085e-30
5	maker-tulip_contig_327_pilon_pilon-augustus-gene-7.18-mRNA-1	exigua_EL1	exigua_egg	2779.74	0	1389.87	13.7969	1.18841	11.6096	3.68422e-31	3.23509e-30
1	maker-tulip_contig_292_pilon_pilon-augustus-gene-0.38-mRNA-1	exigua_EL1	exigua_egg	17.0755	233.535	125.305	-3.7761	0.325283	-11.6086	3.7245e-31	3.26802e-30
1	maker-tulip_contig_336_pilon_pilon-augustus-gene-0.87-mRNA-1	exigua_EL1	exigua_egg	81.1258	413.854	247.49	-2.35014	0.202493	-11.606	3.84096e-31	3.3677e-30
1	maker-tulip_contig_767_pilon_pilon-augustus-gene-0.37-mRNA-1	exigua_EL1	exigua_egg	70.5219	381.443	225.982	-2.43443	0.209782	-11.6046	3.90521e-31	3.42149e-30
1	maker-tulip_contig_15_pilon_pilon-augustus-gene-2.17-mRNA-1	exigua_EL1	exigua_egg	95.7245	595.884	345.804	-2.63792	0.227445	-11.5981	4.21514e-31	3.69028e-30
1	maker-tulip_contig_15_pilon_pilon-augustus-gene-2.19-mRNA-1	exigua_EL1	exigua_egg	509.669	2216.86	1363.26	-2.12073	0.182856	-11.5979	4.2255e-31	3.69661e-30
1	maker-tulip_contig_320_pilon_pilon-augustus-gene-1.0-mRNA-1	exigua_EL1	exigua_egg	36.5646	286.46	161.512	-2.97018	0.256872	-11.5629	6.35573e-31	5.54785e-30
1	augustus_masked-tulip_contig_581_pilon_pilon-processed-gene-3.2-mRNA-1	exigua_EL1	exigua_egg	296.161	7.90986	152.035	5.20212	0.450023	11.5597	6.59526e-31	5.75267e-30
1	augustus_masked-tulip_contig_361_pilon_pilon-processed-gene-1.105-mRNA-1	exigua_EL1	exigua_egg	1705.13	417.631	1061.38	2.0304	0.175684	11.5571	6.7943e-31	5.91752e-30
1	maker-tulip_contig_216_pilon_pilon-augustus-gene-0.41-mRNA-1	exigua_EL1	exigua_egg	779.111	113.06	446.085	2.7866	0.241164	11.5548	6.9817e-31	6.07624e-30
1	maker-tulip_contig_841_pilon_pilon-augustus-gene-0.30-mRNA-1	exigua_EL1	exigua_egg	372.975	1664.9	1018.94	-2.15822	0.186913	-11.5467	7.67364e-31	6.66658e-30
1	maker-tulip_contig_610_pilon_pilon-augustus-gene-1.28-mRNA-1	exigua_EL1	exigua_egg	235.18	4.91033	120.045	5.57381	0.482722	11.5466	7.67697e-31	6.66658e-30
1	augustus_masked-tulip_contig_47_pilon_pilon-processed-gene-0.5-mRNA-1	exigua_EL1	exigua_egg	25.7161	521.249	273.482	-4.34441	0.376253	-11.5465	7.68971e-31	6.67272e-30
1	maker-tulip_contig_584_pilon_pilon-augustus-gene-0.3-mRNA-1	exigua_EL1	exigua_egg	18.4782	266.199	142.339	-3.84608	0.333176	-11.5437	7.94517e-31	6.88932e-30
5	maker-tulip_contig_674_pilon_pilon-augustus-gene-0.33-mRNA-1	exigua_EL1	exigua_egg	198.043	15.0511	106.547	3.73163	0.323356	11.5403	8.26057e-31	7.15754e-30
1	maker-tulip_contig_420_pilon_pilon-augustus-gene-2.86-mRNA-1	exigua_EL1	exigua_egg	142.691	757.622	450.156	-2.40832	0.208793	-11.5345	8.84267e-31	7.65628e-30
1	augustus_masked-tulip_contig_799_pilon_pilon-processed-gene-0.123-mRNA-1	exigua_EL1	exigua_egg	188.527	893.204	540.865	-2.2437	0.194527	-11.5342	8.8744e-31	7.67811e-30
5	maker-tulip_contig_89_pilon_pilon-augustus-gene-4.28-mRNA-1	exigua_EL1	exigua_egg	282.246	2.82333	142.535	6.64218	0.576113	11.5293	9.38978e-31	8.11806e-30
1	maker-tulip_contig_3_pilon_pilon-augustus-gene-2.19-mRNA-1	exigua_EL1	exigua_egg	335.167	2.38533	168.776	7.08875	0.615443	11.5181	1.06906e-30	9.23589e-30
1	augustus_masked-tulip_contig_881_pilon_pilon-processed-gene-1.63-mRNA-1	exigua_EL1	exigua_egg	234.136	4.16235	119.149	5.79184	0.502968	11.5153	1.10438e-30	9.53404e-30
1	augustus_masked-tulip_contig_812_pilon_pilon-processed-gene-1.7-mRNA-1	exigua_EL1	exigua_egg	187.995	8.45273	98.2239	4.47183	0.388745	11.5033	1.27023e-30	1.09578e-29
3	augustus_masked-tulip_contig_819_pilon_pilon-processed-gene-2.27-mRNA-1	exigua_EL1	exigua_egg	305.043	5.13718	155.09	5.93151	0.515792	11.4998	1.32207e-30	1.13884e-29
1	maker-tulip_contig_441_pilon_pilon-augustus-gene-2.4-mRNA-1	exigua_EL1	exigua_egg	234.706	3.15661	118.931	6.20729	0.539879	11.4976	1.35694e-30	1.16802e-29
1	maker-tulip_contig_407_pilon_pilon-augustus-gene-0.40-mRNA-1	exigua_EL1	exigua_egg	70.552	368.904	219.728	-2.38621	0.207715	-11.4879	1.51814e-30	1.30487e-29
1	augustus_masked-tulip_contig_603_pilon_pilon-processed-gene-4.51-mRNA-1	exigua_EL1	exigua_egg	831.332	158.021	494.676	2.39735	0.208799	11.4816	1.63225e-30	1.40193e-29
3	augustus_masked-tulip_contig_327_pilon_pilon-processed-gene-7.7-mRNA-1	exigua_EL1	exigua_egg	242.109	2.84663	122.478	6.41999	0.559358	11.4774	1.71317e-30	1.47036e-29
11	maker-tulip_contig_420_pilon_pilon-augustus-gene-2.49-mRNA-1	exigua_EL1	exigua_egg	717.429	3827.2	2272.31	-2.41542	0.210554	-11.4717	1.82943e-30	1.56786e-29
1	maker-tulip_contig_271_pilon_pilon-augustus-gene-1.63-mRNA-1	exigua_EL1	exigua_egg	283.457	2.55406	143.005	6.83713	0.596311	11.4657	1.96154e-30	1.67863e-29
1	maker-tulip_contig_424_pilon_pilon-augustus-gene-0.79-mRNA-1	exigua_EL1	exigua_egg	174.977	10.9078	92.9426	3.99967	0.348864	11.4648	1.98139e-30	1.69439e-29
8	augustus_masked-tulip_contig_331_pilon_pilon-processed-gene-3.12-mRNA-1	exigua_EL1	exigua_egg	2.17297	390.039	196.106	-7.51058	0.655121	-11.4644	1.99098e-30	1.70135e-29
6	maker-tulip_contig_2_pilon_pilon-augustus-gene-5.43-mRNA-1	exigua_EL1	exigua_egg	2668.9	0	1334.45	13.7382	1.1985	11.4628	2.02855e-30	1.7322e-29
1	augustus_masked-tulip_contig_586_pilon_pilon-processed-gene-8.27-mRNA-1	exigua_EL1	exigua_egg	359.92	18.7913	189.356	4.27428	0.372892	11.4625	2.03517e-30	1.7366e-29
-	maker-tulip_contig_323_pilon_pilon-augustus-gene-8.62-mRNA-1	exigua_EL1	exigua_egg	947.206	49.8837	498.545	4.25574	0.371338	11.4605	2.08212e-30	1.77538e-29
3	augustus_masked-tulip_contig_22_pilon_pilon-processed-gene-0.18-mRNA-1	exigua_EL1	exigua_egg	3649.05	0	1824.52	14.1895	1.23819	11.4599	2.0985e-30	1.78805e-29
1	augustus_masked-tulip_contig_221_pilon_pilon-processed-gene-0.6-mRNA-1	exigua_EL1	exigua_egg	90.7434	479.45	285.097	-2.40258	0.209698	-11.4573	2.16061e-30	1.83831e-29
3	augustus_masked-tulip_contig_916_pilon_pilon-processed-gene-0.36-mRNA-1	exigua_EL1	exigua_egg	2647.89	0.730575	1324.31	11.8711	1.0363	11.4553	2.21247e-30	1.88108e-29
1	maker-tulip_contig_818_pilon_pilon-augustus-gene-0.30-mRNA-1	exigua_EL1	exigua_egg	9.10436	191.572	100.338	-4.39141	0.38366	-11.4461	2.45968e-30	2.08824e-29
1	augustus_masked-tulip_contig_697_pilon_pilon-processed-gene-1.27-mRNA-1	exigua_EL1	exigua_egg	33.8959	314.46	174.178	-3.21534	0.280964	-11.444	2.52136e-30	2.13753e-29
1	maker-tulip_contig_43_pilon_pilon-augustus-gene-6.27-mRNA-1	exigua_EL1	exigua_egg	64.1912	501.63	282.911	-2.96734	0.259448	-11.4371	2.72812e-30	2.31115e-29
3	maker-tulip_contig_547_pilon_pilon-augustus-gene-1.22-mRNA-1	exigua_EL1	exigua_egg	392.186	27.7336	209.96	3.81077	0.333215	11.4364	2.75123e-30	2.32906e-29
1	augustus_masked-tulip_contig_407_pilon_pilon-processed-gene-8.18-mRNA-1	exigua_EL1	exigua_egg	269.05	15.7468	142.399	4.10477	0.358954	11.4354	2.7837e-30	2.35354e-29
8	augustus_masked-tulip_contig_669_pilon_pilon-processed-gene-1.8-mRNA-1	exigua_EL1	exigua_egg	1.82146	336.057	168.939	-7.52508	0.65806	-11.4352	2.78756e-30	2.35474e-29
1	augustus_masked-tulip_contig_145_pilon_pilon-processed-gene-4.3-mRNA-1	exigua_EL1	exigua_egg	391.998	58.6203	225.309	2.7377	0.239431	11.4342	2.82179e-30	2.38195e-29
1	maker-tulip_contig_586_pilon_pilon-augustus-gene-10.46-mRNA-1	exigua_EL1	exigua_egg	170.697	979.432	575.064	-2.51965	0.220491	-11.4275	3.04927e-30	2.57212e-29
4	maker-tulip_contig_687_pilon_pilon-augustus-gene-1.25-mRNA-1	exigua_EL1	exigua_egg	3060.02	0	1530.01	13.9355	1.2208	11.4151	3.51386e-30	2.9619e-29
1	maker-tulip_contig_476_pilon_pilon-augustus-gene-0.2-mRNA-1	exigua_EL1	exigua_egg	288.42	2.82923	145.624	6.67307	0.584619	11.4144	3.54383e-30	2.98289e-29
1	maker-tulip_contig_196_pilon_pilon-augustus-gene-5.44-mRNA-1	exigua_EL1	exigua_egg	263.862	1104.35	684.104	-2.06547	0.180971	-11.4133	3.59027e-30	3.01982e-29
6	maker-tulip_contig_439_pilon_pilon-augustus-gene-0.0-mRNA-1	exigua_EL1	exigua_egg	3222.66	0.666561	1611.66	12.1587	1.06578	11.4084	3.7986e-30	3.19278e-29
5	maker-tulip_contig_39_pilon_pilon-augustus-gene-1.157-mRNA-1	exigua_EL1	exigua_egg	2835.05	0.771283	1417.91	11.9667	1.04928	11.4047	3.96277e-30	3.32839e-29
1	maker-tulip_contig_59_pilon_pilon-augustus-gene-0.51-mRNA-1	exigua_EL1	exigua_egg	84.9317	500.691	292.811	-2.5579	0.224303	-11.4038	4.0044e-30	3.36096e-29
-	augustus_masked-tulip_contig_2_pilon_pilon-processed-gene-5.2-mRNA-1	exigua_EL1	exigua_egg	387.958	3.44343	195.701	6.78793	0.595289	11.4028	4.05088e-30	3.39755e-29
1	maker-tulip_contig_628_pilon_pilon-augustus-gene-4.64-mRNA-1	exigua_EL1	exigua_egg	342.974	12.5279	177.751	4.76337	0.417746	11.4026	4.06015e-30	3.40291e-29
1	augustus_masked-tulip_contig_351_pilon_pilon-processed-gene-1.115-mRNA-1	exigua_EL1	exigua_egg	331.853	1827.48	1079.67	-2.46076	0.215834	-11.4012	4.12534e-30	3.45508e-29
1	augustus_masked-tulip_contig_777_pilon_pilon-processed-gene-1.1-mRNA-1	exigua_EL1	exigua_egg	197.167	864.701	530.934	-2.13213	0.187053	-11.3985	4.25445e-30	3.56069e-29
5	augustus_masked-tulip_contig_323_pilon_pilon-processed-gene-8.31-mRNA-1	exigua_EL1	exigua_egg	421.533	48.8367	235.185	3.11414	0.273245	11.3969	4.33358e-30	3.62177e-29
1	maker-tulip_contig_611_pilon_pilon-augustus-gene-2.2-mRNA-1	exigua_EL1	exigua_egg	196.133	4.17401	100.153	5.53491	0.486243	11.383	5.08122e-30	4.24359e-29
-	augustus_masked-tulip_contig_247_pilon_pilon-processed-gene-2.181-mRNA-1	exigua_EL1	exigua_egg	4853.6	0.344933	2426.97	13.6392	1.19846	11.3806	5.22434e-30	4.36003e-29
1	maker-tulip_contig_855_pilon_pilon-augustus-gene-1.37-mRNA-1	exigua_EL1	exigua_egg	360.411	2094.92	1227.67	-2.53916	0.223297	-11.3712	5.81978e-30	4.84667e-29
3	maker-tulip_contig_41_pilon_pilon-augustus-gene-0.10-mRNA-1	exigua_EL1	exigua_egg	212.129	3.93954	108.034	5.76774	0.507256	11.3705	5.86685e-30	4.88241e-29
4	augustus_masked-tulip_contig_82_pilon_pilon-processed-gene-1.16-mRNA-1	exigua_EL1	exigua_egg	2318.9	0	1159.45	13.5355	1.1906	11.3686	5.99503e-30	4.98205e-29
3	maker-tulip_contig_740_pilon_pilon-augustus-gene-1.2-mRNA-1	exigua_EL1	exigua_egg	873.815	1.0522	437.434	9.68766	0.852371	11.3656	6.20722e-30	5.15475e-29
1	augustus_masked-tulip_contig_216_pilon_pilon-processed-gene-0.98-mRNA-1	exigua_EL1	exigua_egg	941.445	118.733	530.089	2.9874	0.262853	11.3653	6.22711e-30	5.16762e-29
1	augustus_masked-tulip_contig_407_pilon_pilon-processed-gene-3.54-mRNA-1	exigua_EL1	exigua_egg	41.6337	284.71	163.172	-2.77214	0.24392	-11.365	6.24671e-30	5.18024e-29
1	augustus_masked-tulip_contig_2_pilon_pilon-processed-gene-6.4-mRNA-1	exigua_EL1	exigua_egg	48.8546	377.374	213.114	-2.94741	0.259407	-11.3621	6.45657e-30	5.34675e-29
1	augustus_masked-tulip_contig_773_pilon_pilon-processed-gene-0.1-mRNA-1	exigua_EL1	exigua_egg	232.804	3.20897	118.006	6.19277	0.545081	11.3612	6.52448e-30	5.39919e-29
1	augustus_masked-tulip_contig_247_pilon_pilon-processed-gene-2.160-mRNA-1	exigua_EL1	exigua_egg	107.318	487.621	297.469	-2.1829	0.192254	-11.3542	7.06694e-30	5.83171e-29
1	augustus_masked-tulip_contig_77_pilon_pilon-processed-gene-0.12-mRNA-1	exigua_EL1	exigua_egg	130.157	607.133	368.645	-2.22067	0.195645	-11.3505	7.37278e-30	6.07558e-29
11	maker-tulip_contig_690_pilon_pilon-augustus-gene-5.58-mRNA-1	exigua_EL1	exigua_egg	885.816	3611.37	2248.59	-2.02747	0.178655	-11.3485	7.54445e-30	6.2127e-29
3	maker-tulip_contig_831_pilon_pilon-augustus-gene-0.35-mRNA-1	exigua_EL1	exigua_egg	228.665	2.79427	115.73	6.33967	0.558747	11.3462	7.74281e-30	6.36715e-29
8	maker-tulip_contig_610_pilon_pilon-augustus-gene-1.2-mRNA-1	exigua_EL1	exigua_egg	50.6779	1351.52	701.1	-4.73787	0.41761	-11.3452	7.83499e-30	6.43846e-29
5	augustus_masked-tulip_contig_148_pilon_pilon-processed-gene-0.64-mRNA-1	exigua_EL1	exigua_egg	287.495	3.58886	145.542	6.34191	0.559204	11.341	8.22298e-30	6.74788e-29
3	maker-tulip_contig_81_pilon_pilon-augustus-gene-1.20-mRNA-1	exigua_EL1	exigua_egg	400.499	48.6407	224.57	3.04007	0.268076	11.3403	8.28257e-30	6.79206e-29
13	maker-tulip_contig_872_pilon_pilon-augustus-gene-0.81-mRNA-1	exigua_EL1	exigua_egg	179.386	6.60004	92.993	4.74561	0.418554	11.3381	8.49564e-30	6.96193e-29
5	maker-tulip_contig_21_pilon_pilon-augustus-gene-0.11-mRNA-1	exigua_EL1	exigua_egg	3315.72	0.730575	1658.23	12.1938	1.07549	11.3379	8.51491e-30	6.97288e-29
5	maker-tulip_contig_194_pilon_pilon-augustus-gene-0.20-mRNA-1	exigua_EL1	exigua_egg	244.438	5.02095	124.729	5.62157	0.495919	11.3357	8.7371e-30	7.14986e-29
1	maker-tulip_contig_276_pilon_pilon-augustus-gene-1.18-mRNA-1	exigua_EL1	exigua_egg	237.035	977.95	607.493	-2.04482	0.180544	-11.3259	9.76837e-30	7.97716e-29
1	augustus_masked-tulip_contig_807_pilon_pilon-processed-gene-2.13-mRNA-1	exigua_EL1	exigua_egg	189.155	767.892	478.524	-2.02165	0.178547	-11.3228	1.01185e-29	8.25736e-29
1	maker-tulip_contig_316_pilon_pilon-augustus-gene-3.71-mRNA-1	exigua_EL1	exigua_egg	208.678	13.5509	111.114	3.9298	0.347096	11.3219	1.02188e-29	8.33342e-29
1	augustus_masked-tulip_contig_40_pilon_pilon-processed-gene-0.43-mRNA-1	exigua_EL1	exigua_egg	87.881	420.582	254.232	-2.25754	0.199426	-11.3202	1.04219e-29	8.4932e-29
1	maker-tulip_contig_211_pilon_pilon-augustus-gene-1.58-mRNA-1	exigua_EL1	exigua_egg	353.04	1534.97	944.004	-2.12055	0.187329	-11.32	1.04499e-29	8.51013e-29
1	maker-tulip_contig_436_pilon_pilon-augustus-gene-0.8-mRNA-1	exigua_EL1	exigua_egg	260.956	2.36792	131.662	6.72643	0.59446	11.3152	1.10368e-29	8.98192e-29
3	maker-tulip_contig_3_pilon_pilon-augustus-gene-3.16-mRNA-1	exigua_EL1	exigua_egg	583.563	43.8065	313.685	3.74538	0.331165	11.3097	1.17484e-29	9.55439e-29
1	maker-tulip_contig_711_pilon_pilon-augustus-gene-0.42-mRNA-1	exigua_EL1	exigua_egg	1295.2	273.623	784.409	2.24508	0.198574	11.306	1.22513e-29	9.95654e-29
6	maker-tulip_contig_218_pilon_pilon-augustus-gene-1.104-mRNA-1	exigua_EL1	exigua_egg	2392.19	0	1196.09	13.5804	1.20126	11.3051	1.23799e-29	1.00541e-28
1	maker-tulip_contig_327_pilon_pilon-augustus-gene-7.44-mRNA-1	exigua_EL1	exigua_egg	443.891	22.4325	233.162	4.31941	0.3821	11.3044	1.24798e-29	1.01282e-28
-	augustus_masked-tulip_contig_515_pilon_pilon-processed-gene-1.23-mRNA-1	exigua_EL1	exigua_egg	2518.9	0	1259.45	13.6548	1.20904	11.2939	1.40594e-29	1.13867e-28
1	augustus_masked-tulip_contig_435_pilon_pilon-processed-gene-0.13-mRNA-1	exigua_EL1	exigua_egg	2261.17	0	1130.58	13.499	1.19585	11.2882	1.50088e-29	1.21472e-28
-	augustus_masked-tulip_contig_247_pilon_pilon-processed-gene-2.138-mRNA-1	exigua_EL1	exigua_egg	2137.98	0	1068.99	13.4182	1.18874	11.2878	1.50759e-29	1.21931e-28
1	augustus_masked-tulip_contig_854_pilon_pilon-processed-gene-2.7-mRNA-1	exigua_EL1	exigua_egg	203.795	4.20306	103.999	5.58948	0.495197	11.2874	1.51483e-29	1.22434e-28
3	maker-tulip_contig_212_pilon_pilon-augustus-gene-1.112-mRNA-1	exigua_EL1	exigua_egg	203.269	6.64075	104.955	4.92429	0.436307	11.2863	1.53369e-29	1.23873e-28
1	maker-tulip_contig_707_pilon_pilon-augustus-gene-0.5-mRNA-1	exigua_EL1	exigua_egg	2715.49	327.554	1521.52	3.05286	0.270533	11.2846	1.56302e-29	1.26155e-28
3	maker-tulip_contig_465_pilon_pilon-augustus-gene-0.41-mRNA-1	exigua_EL1	exigua_egg	1362.93	64.5185	713.724	4.40728	0.390694	11.2806	1.63551e-29	1.31825e-28
1	maker-tulip_contig_336_pilon_pilon-augustus-gene-0.94-mRNA-1	exigua_EL1	exigua_egg	58.8789	342.908	200.893	-2.5401	0.22518	-11.2803	1.6417e-29	1.32233e-28
1	maker-tulip_contig_504_pilon_pilon-augustus-gene-2.28-mRNA-1	exigua_EL1	exigua_egg	14.6491	205.71	110.18	-3.81266	0.338071	-11.2777	1.69104e-29	1.36021e-28
1	maker-tulip_contig_388_pilon_pilon-augustus-gene-0.30-mRNA-1	exigua_EL1	exigua_egg	241.122	18.324	129.723	3.73183	0.33119	11.2679	1.88954e-29	1.51678e-28
5	maker-tulip_contig_396_pilon_pilon-augustus-gene-0.9-mRNA-1	exigua_EL1	exigua_egg	877.892	69.1763	473.534	3.65993	0.324812	11.2678	1.89146e-29	1.51729e-28
1	maker-tulip_contig_182_pilon_pilon-augustus-gene-1.87-mRNA-1	exigua_EL1	exigua_egg	170.922	918.099	544.511	-2.42519	0.215243	-11.2672	1.90466e-29	1.52684e-28
7	maker-tulip_contig_636_pilon_pilon-augustus-gene-0.16-mRNA-1	exigua_EL1	exigua_egg	4.86179	236.508	120.685	-5.60185	0.497355	-11.2633	1.99186e-29	1.59565e-28
6	maker-tulip_contig_378_pilon_pilon-augustus-gene-2.25-mRNA-1	exigua_EL1	exigua_egg	2157.92	0	1078.96	13.4316	1.1928	11.2606	2.0527e-29	1.64328e-28
1	maker-tulip_contig_126_pilon_pilon-augustus-gene-0.27-mRNA-1	exigua_EL1	exigua_egg	97.9532	740.598	419.276	-2.91802	0.259189	-11.2583	2.10852e-29	1.68681e-28
5	maker-tulip_contig_547_pilon_pilon-augustus-gene-1.7-mRNA-1	exigua_EL1	exigua_egg	823.723	0.999842	412.362	9.60424	0.853257	11.256	2.16419e-29	1.73018e-28
5	maker-tulip_contig_843_pilon_pilon-augustus-gene-8.19-mRNA-1	exigua_EL1	exigua_egg	490.369	12.5876	251.478	5.26034	0.467692	11.2474	2.38404e-29	1.90464e-28
3	maker-tulip_contig_77_pilon_pilon-augustus-gene-1.60-mRNA-1	exigua_EL1	exigua_egg	2112.32	0	1056.16	13.4008	1.19228	11.2396	2.60414e-29	2.07908e-28
1	maker-tulip_contig_69_pilon_pilon-augustus-gene-1.21-mRNA-1	exigua_EL1	exigua_egg	240.449	35.2951	137.872	2.7673	0.246256	11.2375	2.66853e-29	2.12904e-28
1	maker-tulip_contig_312_pilon_pilon-augustus-gene-0.12-mRNA-1	exigua_EL1	exigua_egg	334.432	7.00152	170.717	5.61491	0.499744	11.2356	2.72712e-29	2.17431e-28
3	augustus_masked-tulip_contig_408_pilon_pilon-processed-gene-0.8-mRNA-1	exigua_EL1	exigua_egg	2264.84	0.771283	1132.8	11.6443	1.03687	11.2303	2.89594e-29	2.30736e-28
3	augustus_masked-tulip_contig_242_pilon_pilon-processed-gene-0.4-mRNA-1	exigua_EL1	exigua_egg	402.444	2.15102	202.298	7.56615	0.674297	11.2208	3.22405e-29	2.56531e-28
-	maker-tulip_contig_320_pilon_pilon-augustus-gene-2.14-mRNA-1	exigua_EL1	exigua_egg	78.3435	492.068	285.206	-2.65231	0.236511	-11.2143	3.46844e-29	2.7579e-28
1	maker-tulip_contig_112_pilon_pilon-augustus-gene-2.27-mRNA-1	exigua_EL1	exigua_egg	240.852	1356.43	798.64	-2.49332	0.222427	-11.2096	3.65806e-29	2.90671e-28
-	augustus_masked-tulip_contig_515_pilon_pilon-processed-gene-1.6-mRNA-1	exigua_EL1	exigua_egg	2545.79	0.689866	1273.24	11.8162	1.05458	11.2046	3.87117e-29	3.07398e-28
1	maker-tulip_contig_353_pilon_pilon-augustus-gene-0.11-mRNA-1	exigua_EL1	exigua_egg	228.522	1063.83	646.178	-2.2186	0.198156	-11.1962	4.25474e-29	3.37401e-28
3	maker-tulip_contig_927_pilon_pilon-augustus-gene-0.17-mRNA-1	exigua_EL1	exigua_egg	1991.94	0	995.969	13.3162	1.18979	11.1921	4.4596e-29	3.53409e-28
5	maker-tulip_contig_354_pilon_pilon-augustus-gene-0.64-mRNA-1	exigua_EL1	exigua_egg	236.35	4.48227	120.416	5.78417	0.517073	11.1864	4.75473e-29	3.76544e-28
1	maker-tulip_contig_333_pilon_pilon-augustus-gene-3.119-mRNA-1	exigua_EL1	exigua_egg	213.797	7.511	110.654	4.84332	0.432974	11.1862	4.76511e-29	3.77112e-28
1	maker-tulip_contig_753_pilon_pilon-augustus-gene-1.77-mRNA-1	exigua_EL1	exigua_egg	7.53929	339.942	173.741	-5.48754	0.490699	-11.1831	4.93359e-29	3.90184e-28
5	maker-tulip_contig_745_pilon_pilon-augustus-gene-2.0-mRNA-1	exigua_EL1	exigua_egg	321.221	13.9017	167.561	4.51822	0.404322	11.1748	5.41709e-29	4.27562e-28
5	augustus_masked-tulip_contig_843_pilon_pilon-processed-gene-2.16-mRNA-1	exigua_EL1	exigua_egg	447.839	31.2283	239.533	3.85561	0.345229	11.1683	5.8305e-29	4.59883e-28
3	maker-tulip_contig_506_pilon_pilon-augustus-gene-1.126-mRNA-1	exigua_EL1	exigua_egg	1943.37	0	971.687	13.2806	1.18935	11.1662	5.96551e-29	4.70218e-28
1	maker-tulip_contig_3_pilon_pilon-augustus-gene-1.35-mRNA-1	exigua_EL1	exigua_egg	636.25	141.227	388.739	2.1742	0.194751	11.164	6.11836e-29	4.81943e-28
5	maker-tulip_contig_586_pilon_pilon-augustus-gene-12.23-mRNA-1	exigua_EL1	exigua_egg	327.914	25.6158	176.765	3.67373	0.329114	11.1625	6.22382e-29	4.89923e-28
1	augustus_masked-tulip_contig_15_pilon_pilon-processed-gene-0.12-mRNA-1	exigua_EL1	exigua_egg	371.429	2.05795	186.743	7.45803	0.668285	11.16	6.40272e-29	5.03669e-28
5	maker-tulip_contig_307_pilon_pilon-augustus-gene-1.99-mRNA-1	exigua_EL1	exigua_egg	737.644	75.9161	406.78	3.27475	0.293447	11.1596	6.42726e-29	5.05263e-28
1	maker-tulip_contig_351_pilon_pilon-augustus-gene-1.41-mRNA-1	exigua_EL1	exigua_egg	375.276	14.2796	194.778	4.72315	0.423345	11.1567	6.63877e-29	5.21542e-28
1	maker-tulip_contig_236_pilon_pilon-augustus-gene-4.50-mRNA-1	exigua_EL1	exigua_egg	114.959	559.173	337.066	-2.28219	0.204561	-11.1565	6.65753e-29	5.22667e-28
1	maker-tulip_contig_481_pilon_pilon-augustus-gene-0.6-mRNA-1	exigua_EL1	exigua_egg	13.0758	169.94	91.5079	-3.69804	0.331668	-11.1498	7.17536e-29	5.62946e-28
1	maker-tulip_contig_759_pilon_pilon-augustus-gene-1.58-mRNA-1	exigua_EL1	exigua_egg	80.2713	429.078	254.675	-2.417	0.216893	-11.1437	7.68392e-29	6.02444e-28
1	augustus_masked-tulip_contig_112_pilon_pilon-processed-gene-2.57-mRNA-1	exigua_EL1	exigua_egg	568.383	1.54257	284.963	8.64233	0.775838	11.1394	8.07048e-29	6.3191e-28
3	maker-tulip_contig_326_pilon_pilon-augustus-gene-2.0-mRNA-1	exigua_EL1	exigua_egg	2110.32	0	1055.16	13.3994	1.20324	11.1361	8.3726e-29	6.55131e-28
1	maker-tulip_contig_29_pilon_pilon-augustus-gene-1.36-mRNA-1	exigua_EL1	exigua_egg	495.324	2012.92	1254.12	-2.02242	0.181615	-11.1357	8.40763e-29	6.57435e-28
-	maker-tulip_contig_560_pilon_pilon-augustus-gene-3.26-mRNA-1	exigua_EL1	exigua_egg	253.494	2.73026	128.112	6.49307	0.583315	11.1313	8.83136e-29	6.90111e-28
1	maker-tulip_contig_491_pilon_pilon-augustus-gene-0.22-mRNA-1	exigua_EL1	exigua_egg	317.417	6.65659	162.037	5.61647	0.504625	11.13	8.96539e-29	7.0012e-28
1	augustus_masked-tulip_contig_514_pilon_pilon-processed-gene-1.56-mRNA-1	exigua_EL1	exigua_egg	6.69561	159.127	82.9112	-4.56987	0.410702	-11.127	9.27306e-29	7.23667e-28
1	maker-tulip_contig_855_pilon_pilon-augustus-gene-1.36-mRNA-1	exigua_EL1	exigua_egg	224.746	1222.39	723.569	-2.44297	0.219698	-11.1196	1.00672e-28	7.84123e-28
1	augustus_masked-tulip_contig_474_pilon_pilon-processed-gene-0.127-mRNA-1	exigua_EL1	exigua_egg	182.939	9.29378	96.1164	4.31126	0.387807	11.117	1.03675e-28	8.06406e-28
6	maker-tulip_contig_926_pilon_pilon-augustus-gene-0.23-mRNA-1	exigua_EL1	exigua_egg	2377.95	0.689866	1189.32	11.7177	1.05482	11.1088	1.13677e-28	8.83621e-28
1	maker-tulip_contig_531_pilon_pilon-augustus-gene-2.0-mRNA-1	exigua_EL1	exigua_egg	276.363	2.64713	139.505	6.79297	0.611653	11.1059	1.17399e-28	9.1195e-28
3	maker-tulip_contig_55_pilon_pilon-augustus-gene-0.91-mRNA-1	exigua_EL1	exigua_egg	8130.18	1730.53	4930.36	2.23171	0.201133	11.0957	1.31664e-28	1.02074e-27
3	maker-tulip_contig_537_pilon_pilon-augustus-gene-0.43-mRNA-1	exigua_EL1	exigua_egg	4385.5	7.79596	2196.65	9.1538	0.825008	11.0954	1.32055e-28	1.0231e-27
6	maker-tulip_contig_881_pilon_pilon-augustus-gene-1.2-mRNA-1	exigua_EL1	exigua_egg	1982.91	0	991.454	13.3095	1.1996	11.095	1.32624e-28	1.02684e-27
5	augustus_masked-tulip_contig_320_pilon_pilon-processed-gene-1.16-mRNA-1	exigua_EL1	exigua_egg	282.049	13.3979	147.723	4.39423	0.396216	11.0905	1.39494e-28	1.07932e-27
1	maker-tulip_contig_519_pilon_pilon-augustus-gene-0.12-mRNA-1	exigua_EL1	exigua_egg	290.627	2.19172	146.409	7.09553	0.640392	11.08	1.56894e-28	1.21156e-27
5	augustus_masked-tulip_contig_148_pilon_pilon-processed-gene-0.68-mRNA-1	exigua_EL1	exigua_egg	282.433	3.79411	143.113	6.19146	0.55931	11.0698	1.75771e-28	1.35555e-27
-	maker-tulip_contig_65_pilon_pilon-augustus-gene-0.10-mRNA-1	exigua_EL1	exigua_egg	242.683	7.68549	125.184	5.01414	0.453085	11.0667	1.82055e-28	1.4031e-27
3	maker-tulip_contig_78_pilon_pilon-augustus-gene-0.49-mRNA-1	exigua_EL1	exigua_egg	381.446	7.95476	194.701	5.60174	0.506651	11.0564	2.04116e-28	1.57107e-27
6	maker-tulip_contig_623_pilon_pilon-augustus-gene-5.49-mRNA-1	exigua_EL1	exigua_egg	2201.27	0	1100.63	13.4603	1.2175	11.0557	2.05739e-28	1.58252e-27
5	augustus_masked-tulip_contig_208_pilon_pilon-processed-gene-1.25-mRNA-1	exigua_EL1	exigua_egg	279.425	6.43549	142.93	5.45187	0.49373	11.0422	2.39078e-28	1.83657e-27
5	maker-tulip_contig_566_pilon_pilon-augustus-gene-1.2-mRNA-1	exigua_EL1	exigua_egg	338.322	81.252	209.787	2.05801	0.186388	11.0415	2.40858e-28	1.84904e-27
1	maker-tulip_contig_199_pilon_pilon-augustus-gene-2.2-mRNA-1	exigua_EL1	exigua_egg	118.303	691.738	405.02	-2.54734	0.230839	-11.0352	2.58557e-28	1.98362e-27
3	maker-tulip_contig_236_pilon_pilon-augustus-gene-5.31-mRNA-1	exigua_EL1	exigua_egg	208.733	15.4151	112.074	3.75175	0.340024	11.0338	2.62606e-28	2.01337e-27
5	maker-tulip_contig_527_pilon_pilon-augustus-gene-3.36-mRNA-1	exigua_EL1	exigua_egg	1750.19	0	875.095	13.1294	1.19041	11.0293	2.75922e-28	2.11409e-27
5	maker-tulip_contig_468_pilon_pilon-augustus-gene-1.29-mRNA-1	exigua_EL1	exigua_egg	1385.27	326.339	855.804	2.08397	0.188955	11.029	2.77044e-28	2.1213e-27
1	maker-tulip_contig_550_pilon_pilon-augustus-gene-0.17-mRNA-1	exigua_EL1	exigua_egg	276.343	2.16842	139.256	7.02418	0.637467	11.0189	3.09805e-28	2.36754e-27
6	augustus_masked-tulip_contig_845_pilon_pilon-processed-gene-0.13-mRNA-1	exigua_EL1	exigua_egg	3286.15	0.385642	1643.27	13.0766	1.18811	11.0062	3.56807e-28	2.7232e-27
4	maker-tulip_contig_410_pilon_pilon-augustus-gene-0.20-mRNA-1	exigua_EL1	exigua_egg	1731.04	0	865.519	13.1136	1.19272	10.9947	4.05067e-28	3.08752e-27
1	maker-tulip_contig_33_pilon_pilon-augustus-gene-3.37-mRNA-1	exigua_EL1	exigua_egg	185.245	5.58279	95.4141	5.03856	0.458397	10.9917	4.19051e-28	3.19205e-27
5	augustus_masked-tulip_contig_323_pilon_pilon-processed-gene-5.14-mRNA-1	exigua_EL1	exigua_egg	256.545	30.2375	143.391	3.08977	0.281143	10.99	4.26756e-28	3.24864e-27
3	augustus_masked-tulip_contig_476_pilon_pilon-processed-gene-0.37-mRNA-1	exigua_EL1	exigua_egg	359.99	3.22652	181.608	6.81779	0.620614	10.9856	4.48464e-28	3.40728e-27
3	augustus_masked-tulip_contig_396_pilon_pilon-processed-gene-0.89-mRNA-1	exigua_EL1	exigua_egg	309.32	12.3034	160.812	4.66952	0.425353	10.978	4.87607e-28	3.69753e-27
1	augustus_masked-tulip_contig_674_pilon_pilon-processed-gene-3.23-mRNA-1	exigua_EL1	exigua_egg	711.166	1.06386	356.115	9.39016	0.855443	10.977	4.93223e-28	3.73771e-27
1	maker-tulip_contig_208_pilon_pilon-augustus-gene-1.95-mRNA-1	exigua_EL1	exigua_egg	2579.3	10430.8	6505.05	-2.01585	0.183647	-10.9768	4.94319e-28	3.74361e-27
5	maker-tulip_contig_106_pilon_pilon-augustus-gene-0.8-mRNA-1	exigua_EL1	exigua_egg	296.086	29.35	162.718	3.3349	0.303817	10.9766	4.94946e-28	3.74595e-27
1	maker-tulip_contig_473_pilon_pilon-augustus-gene-0.1-mRNA-1	exigua_EL1	exigua_egg	226.72	2.92805	114.824	6.32037	0.575846	10.9758	4.99666e-28	3.77925e-27
1	augustus_masked-tulip_contig_716_pilon_pilon-processed-gene-1.5-mRNA-1	exigua_EL1	exigua_egg	91.3029	539.667	315.485	-2.56247	0.233472	-10.9755	5.01195e-28	3.78838e-27
3	maker-tulip_contig_860_pilon_pilon-augustus-gene-1.9-mRNA-1	exigua_EL1	exigua_egg	3314.95	0.333281	1657.64	13.0892	1.19268	10.9746	5.06549e-28	3.82639e-27
1	maker-tulip_contig_3_pilon_pilon-augustus-gene-5.18-mRNA-1	exigua_EL1	exigua_egg	184.778	16.8763	100.827	3.44837	0.314266	10.9728	5.16721e-28	3.90073e-27
5	maker-tulip_contig_39_pilon_pilon-augustus-gene-1.160-mRNA-1	exigua_EL1	exigua_egg	2042.92	0	1021.46	13.3526	1.21745	10.9676	5.4684e-28	4.12282e-27
1	maker-tulip_contig_270_pilon_pilon-augustus-gene-2.37-mRNA-1	exigua_EL1	exigua_egg	43.8492	283.574	163.712	-2.69389	0.245672	-10.9654	5.60683e-28	4.22448e-27
3	maker-tulip_contig_623_pilon_pilon-augustus-gene-4.29-mRNA-1	exigua_EL1	exigua_egg	2219.54	0.718922	1110.13	11.6164	1.05947	10.9643	5.67182e-28	4.27072e-27
3	maker-tulip_contig_323_pilon_pilon-augustus-gene-2.3-mRNA-1	exigua_EL1	exigua_egg	1054.46	1.15692	527.81	9.94743	0.907313	10.9636	5.71691e-28	4.30192e-27
1	maker-tulip_contig_338_pilon_pilon-augustus-gene-0.41-mRNA-1	exigua_EL1	exigua_egg	31.8965	273.775	152.836	-3.10124	0.282952	-10.9603	5.92924e-28	4.45885e-27
3	maker-tulip_contig_776_pilon_pilon-augustus-gene-0.21-mRNA-1	exigua_EL1	exigua_egg	257.938	2.52501	130.232	6.70166	0.611768	10.9546	6.31695e-28	4.74134e-27
5	augustus_masked-tulip_contig_111_pilon_pilon-processed-gene-0.6-mRNA-1	exigua_EL1	exigua_egg	312.714	69.7956	191.255	2.16218	0.197412	10.9526	6.45628e-28	4.84282e-27
1	maker-tulip_contig_407_pilon_pilon-augustus-gene-6.40-mRNA-1	exigua_EL1	exigua_egg	698.872	1.0522	349.962	9.36558	0.855183	10.9515	6.53209e-28	4.89658e-27
1	augustus_masked-tulip_contig_441_pilon_pilon-processed-gene-3.19-mRNA-1	exigua_EL1	exigua_egg	93.4499	473.202	283.326	-2.33936	0.213634	-10.9504	6.6191e-28	4.95864e-27
3	maker-tulip_contig_885_pilon_pilon-augustus-gene-0.6-mRNA-1	exigua_EL1	exigua_egg	359.349	25.0271	192.188	3.85887	0.352518	10.9466	6.90092e-28	5.16648e-27
3	maker-tulip_contig_282_pilon_pilon-augustus-gene-0.7-mRNA-1	exigua_EL1	exigua_egg	1639.05	0	819.527	13.0348	1.19091	10.9453	7.00118e-28	5.23822e-27
4	maker-tulip_contig_218_pilon_pilon-augustus-gene-0.29-mRNA-1	exigua_EL1	exigua_egg	1608.66	0	804.33	13.0078	1.18854	10.9444	7.07029e-28	5.28656e-27
5	maker-tulip_contig_441_pilon_pilon-augustus-gene-6.0-mRNA-1	exigua_EL1	exigua_egg	414.706	27.1432	220.925	3.94588	0.360625	10.9418	7.27684e-28	5.43756e-27
1	augustus_masked-tulip_contig_39_pilon_pilon-processed-gene-1.61-mRNA-1	exigua_EL1	exigua_egg	51.7114	1004.8	528.258	-4.27884	0.391243	-10.9365	7.70805e-28	5.75613e-27
1	maker-tulip_contig_938_pilon_pilon-augustus-gene-0.2-mRNA-1	exigua_EL1	exigua_egg	25.1774	265.93	145.554	-3.39795	0.310717	-10.9358	7.7698e-28	5.79856e-27
6	maker-tulip_contig_125_pilon_pilon-augustus-gene-0.98-mRNA-1	exigua_EL1	exigua_egg	2087.45	0.771283	1044.11	11.5245	1.05386	10.9356	7.79172e-28	5.81124e-27
1	augustus_masked-tulip_contig_112_pilon_pilon-processed-gene-3.30-mRNA-1	exigua_EL1	exigua_egg	195.492	9.07687	102.285	4.45543	0.407532	10.9327	8.04253e-28	5.99451e-27
11	maker-tulip_contig_70_pilon_pilon-augustus-gene-0.43-mRNA-1	exigua_EL1	exigua_egg	816.707	4573.82	2695.26	-2.48548	0.227444	-10.9279	8.48253e-28	6.31846e-27
5	augustus_masked-tulip_contig_272_pilon_pilon-processed-gene-2.50-mRNA-1	exigua_EL1	exigua_egg	2281.83	545.607	1413.72	2.06361	0.188911	10.9237	8.87882e-28	6.60948e-27
6	maker-tulip_contig_916_pilon_pilon-augustus-gene-2.11-mRNA-1	exigua_EL1	exigua_egg	1602.28	0	801.14	13.0021	1.19058	10.9208	9.16882e-28	6.82105e-27
1	augustus_masked-tulip_contig_895_pilon_pilon-processed-gene-3.38-mRNA-1	exigua_EL1	exigua_egg	376.093	1.72467	188.909	7.73713	0.708811	10.9156	9.70422e-28	7.21025e-27
5	maker-tulip_contig_21_pilon_pilon-augustus-gene-0.0-mRNA-1	exigua_EL1	exigua_egg	3160.3	0.333281	1580.32	13.0202	1.19416	10.9033	1.11185e-27	8.25589e-27
-	augustus_masked-tulip_contig_66_pilon_pilon-processed-gene-1.36-mRNA-1	exigua_EL1	exigua_egg	0	1410.39	705.194	-13.0357	1.19576	-10.9016	1.13284e-27	8.40638e-27
5	augustus_masked-tulip_contig_37_pilon_pilon-processed-gene-2.3-mRNA-1	exigua_EL1	exigua_egg	1232.56	26.0485	629.304	5.5752	0.51164	10.8967	1.19499e-27	8.86204e-27
1	maker-tulip_contig_323_pilon_pilon-augustus-gene-0.18-mRNA-1	exigua_EL1	exigua_egg	97.8208	514.264	306.042	-2.39448	0.219863	-10.8908	1.2758e-27	9.44458e-27
5	maker-tulip_contig_468_pilon_pilon-augustus-gene-1.0-mRNA-1	exigua_EL1	exigua_egg	331.38	1.68971	166.535	7.55602	0.693802	10.8907	1.27595e-27	9.44458e-27
1	maker-tulip_contig_674_pilon_pilon-augustus-gene-0.18-mRNA-1	exigua_EL1	exigua_egg	29.2597	219.239	124.249	-2.90636	0.267026	-10.8842	1.3709e-27	1.01347e-26
5	maker-tulip_contig_491_pilon_pilon-augustus-gene-0.32-mRNA-1	exigua_EL1	exigua_egg	196.942	12.7563	104.849	3.92642	0.361055	10.8749	1.51878e-27	1.12069e-26
6	maker-tulip_contig_714_pilon_pilon-augustus-gene-0.1-mRNA-1	exigua_EL1	exigua_egg	1678.41	0	839.203	13.0691	1.2024	10.8692	1.6161e-27	1.19175e-26
4	maker-tulip_contig_217_pilon_pilon-augustus-gene-4.18-mRNA-1	exigua_EL1	exigua_egg	417.277	1.50186	209.389	8.20203	0.754653	10.8686	1.62639e-27	1.19858e-26
5	maker-tulip_contig_316_pilon_pilon-augustus-gene-1.33-mRNA-1	exigua_EL1	exigua_egg	3018.71	0.344933	1509.53	12.9541	1.19237	10.8641	1.70812e-27	1.25803e-26
5	augustus_masked-tulip_contig_819_pilon_pilon-processed-gene-2.32-mRNA-1	exigua_EL1	exigua_egg	426.73	67.0086	246.869	2.66766	0.245623	10.8608	1.77178e-27	1.3041e-26
5	augustus_masked-tulip_contig_773_pilon_pilon-processed-gene-1.7-mRNA-1	exigua_EL1	exigua_egg	262.645	2.04629	132.346	6.95699	0.64061	10.8599	1.78852e-27	1.3156e-26
1	maker-tulip_contig_837_pilon_pilon-augustus-gene-7.35-mRNA-1	exigua_EL1	exigua_egg	231.163	9.31118	120.237	4.64652	0.427877	10.8595	1.79781e-27	1.32161e-26
6	maker-tulip_contig_199_pilon_pilon-augustus-gene-4.96-mRNA-1	exigua_EL1	exigua_egg	1631.75	0	815.877	13.0285	1.20018	10.8554	1.87911e-27	1.37965e-26
5	maker-tulip_contig_270_pilon_pilon-augustus-gene-3.157-mRNA-1	exigua_EL1	exigua_egg	157.512	8.5399	83.0261	4.21287	0.388096	10.8552	1.88312e-27	1.38174e-26
5	augustus_masked-tulip_contig_441_pilon_pilon-processed-gene-6.15-mRNA-1	exigua_EL1	exigua_egg	249.043	3.34446	126.194	6.15514	0.56708	10.8541	1.90703e-27	1.39841e-26
6	augustus_masked-tulip_contig_125_pilon_pilon-processed-gene-0.415-mRNA-1	exigua_EL1	exigua_egg	1606.26	0	803.132	13.0057	1.19836	10.8529	1.93128e-27	1.41531e-26
6	augustus_masked-tulip_contig_68_pilon_pilon-processed-gene-0.87-mRNA-1	exigua_EL1	exigua_egg	2053.65	0.718922	1027.18	11.5044	1.06123	10.8405	2.21167e-27	1.61777e-26
3	maker-tulip_contig_632_pilon_pilon-augustus-gene-3.45-mRNA-1	exigua_EL1	exigua_egg	688.623	1.0348	344.829	9.34497	0.86205	10.8404	2.21499e-27	1.6192e-26
1	maker-tulip_contig_498_pilon_pilon-augustus-gene-0.31-mRNA-1	exigua_EL1	exigua_egg	39.1252	313.724	176.425	-3.00226	0.276969	-10.8397	2.23181e-27	1.63048e-26
12	maker-tulip_contig_422_pilon_pilon-augustus-gene-0.17-mRNA-1	exigua_EL1	exigua_egg	2.10566	479.266	240.686	-7.81741	0.722431	-10.821	2.73825e-27	1.99799e-26
5	augustus_masked-tulip_contig_236_pilon_pilon-processed-gene-7.13-mRNA-1	exigua_EL1	exigua_egg	704.664	136.919	420.791	2.36101	0.218255	10.8177	2.83939e-27	2.07051e-26
1	maker-tulip_contig_482_pilon_pilon-augustus-gene-0.1-mRNA-1	exigua_EL1	exigua_egg	197.901	2.84663	100.374	6.12907	0.566727	10.8149	2.92748e-27	2.13342e-26
6	maker-tulip_contig_441_pilon_pilon-augustus-gene-1.37-mRNA-1	exigua_EL1	exigua_egg	1447.67	0	723.834	12.8557	1.18885	10.8136	2.96836e-27	2.16188e-26
1	augustus_masked-tulip_contig_514_pilon_pilon-processed-gene-1.65-mRNA-1	exigua_EL1	exigua_egg	749.488	118.069	433.778	2.66546	0.246514	10.8126	2.99958e-27	2.18326e-26
5	augustus_masked-tulip_contig_208_pilon_pilon-processed-gene-1.3-mRNA-1	exigua_EL1	exigua_egg	274.564	12.9136	143.739	4.40062	0.407071	10.8104	3.07185e-27	2.23448e-26
5	maker-tulip_contig_58_pilon_pilon-augustus-gene-4.1-mRNA-1	exigua_EL1	exigua_egg	261.24	15.2231	138.232	4.08574	0.378042	10.8076	3.16722e-27	2.30244e-26
8	maker-tulip_contig_334_pilon_pilon-augustus-gene-0.58-mRNA-1	exigua_EL1	exigua_egg	3.3357	223.893	113.614	-6.06355	0.561477	-10.7993	3.46915e-27	2.52037e-26
1	maker-tulip_contig_673_pilon_pilon-augustus-gene-0.66-mRNA-1	exigua_EL1	exigua_egg	322.374	62.13	192.252	2.37864	0.22031	10.7968	3.56484e-27	2.5883e-26
1	maker-tulip_contig_209_pilon_pilon-augustus-gene-1.4-mRNA-1	exigua_EL1	exigua_egg	62.4598	363.578	213.019	-2.54149	0.235586	-10.7879	3.92521e-27	2.84469e-26
1	maker-tulip_contig_523_pilon_pilon-augustus-gene-0.68-mRNA-1	exigua_EL1	exigua_egg	32.4797	239.546	136.013	-2.88	0.266983	-10.7872	3.95704e-27	2.866e-26
1	augustus_masked-tulip_contig_276_pilon_pilon-processed-gene-3.99-mRNA-1	exigua_EL1	exigua_egg	170.703	7.17772	88.9406	4.58898	0.425484	10.7853	4.03867e-27	2.92332e-26
1	augustus_masked-tulip_contig_199_pilon_pilon-processed-gene-0.2-mRNA-1	exigua_EL1	exigua_egg	2.74549	196.319	99.5321	-6.16405	0.571536	-10.7851	4.05018e-27	2.92985e-26
8	augustus_masked-tulip_contig_741_pilon_pilon-processed-gene-0.27-mRNA-1	exigua_EL1	exigua_egg	4.57759	154.087	79.3322	-5.07487	0.471283	-10.7682	4.86464e-27	3.5104e-26
11	augustus_masked-tulip_contig_228_pilon_pilon-processed-gene-1.12-mRNA-1	exigua_EL1	exigua_egg	1.24069	417.415	209.328	-8.42009	0.782252	-10.7639	5.09591e-27	3.67279e-26
1	augustus_masked-tulip_contig_691_pilon_pilon-processed-gene-2.20-mRNA-1	exigua_EL1	exigua_egg	175.413	4.78649	90.0996	5.24412	0.487233	10.7631	5.14339e-27	3.70475e-26
-	augustus_masked-tulip_contig_515_pilon_pilon-processed-gene-1.9-mRNA-1	exigua_EL1	exigua_egg	1957.62	0.689866	979.156	11.4374	1.06298	10.7598	5.33025e-27	3.837e-26
8	augustus_masked-tulip_contig_281_pilon_pilon-processed-gene-1.49-mRNA-1	exigua_EL1	exigua_egg	2.43416	2827.26	1414.85	-10.1815	0.946352	-10.7587	5.39493e-27	3.88119e-26
1	augustus_masked-tulip_contig_109_pilon_pilon-processed-gene-1.70-mRNA-1	exigua_EL1	exigua_egg	157.217	5.61185	81.4145	4.79997	0.446394	10.7528	5.75096e-27	4.1348e-26
1	maker-tulip_contig_2_pilon_pilon-augustus-gene-7.2-mRNA-1	exigua_EL1	exigua_egg	163.287	6.34818	84.8175	4.68315	0.435694	10.7487	6.00972e-27	4.3182e-26
1	maker-tulip_contig_44_pilon_pilon-augustus-gene-1.2-mRNA-1	exigua_EL1	exigua_egg	46.1439	360.058	203.101	-2.96193	0.27568	-10.7441	6.32034e-27	4.53863e-26
6	maker-tulip_contig_224_pilon_pilon-augustus-gene-2.42-mRNA-1	exigua_EL1	exigua_egg	1489.14	0	744.569	12.8964	1.20047	10.7428	6.40832e-27	4.59901e-26
1	maker-tulip_contig_196_pilon_pilon-augustus-gene-2.3-mRNA-1	exigua_EL1	exigua_egg	110.289	560.305	335.297	-2.34398	0.218243	-10.7403	6.5859e-27	4.72357e-26
1	maker-tulip_contig_659_pilon_pilon-augustus-gene-1.39-mRNA-1	exigua_EL1	exigua_egg	467.833	2184.56	1326.2	-2.22293	0.207227	-10.727	7.6006e-27	5.44471e-26
3	augustus_masked-tulip_contig_238_pilon_pilon-processed-gene-0.9-mRNA-1	exigua_EL1	exigua_egg	192.377	4.46068	98.419	5.39738	0.503644	10.7167	8.5025e-27	6.08709e-26
1	augustus_masked-tulip_contig_747_pilon_pilon-processed-gene-0.9-mRNA-1	exigua_EL1	exigua_egg	17.5275	266.227	141.877	-3.92102	0.365983	-10.7137	8.78196e-27	6.28334e-26
4	maker-tulip_contig_525_pilon_pilon-augustus-gene-2.5-mRNA-1	exigua_EL1	exigua_egg	1483.7	0	741.852	12.8912	1.20438	10.7036	9.79076e-27	6.99238e-26
5	maker-tulip_contig_218_pilon_pilon-augustus-gene-0.31-mRNA-1	exigua_EL1	exigua_egg	1858.55	0	929.276	13.2161	1.23532	10.6985	1.03406e-26	7.38058e-26
1	maker-tulip_contig_42_pilon_pilon-augustus-gene-1.7-mRNA-1	exigua_EL1	exigua_egg	446.361	17.7555	232.058	4.63383	0.433313	10.6939	1.08646e-26	7.74989e-26
5	maker-tulip_contig_704_pilon_pilon-augustus-gene-2.56-mRNA-1	exigua_EL1	exigua_egg	209.894	2.71861	106.306	6.22171	0.582329	10.6842	1.20708e-26	8.59468e-26
5	maker-tulip_contig_407_pilon_pilon-augustus-gene-1.51-mRNA-1	exigua_EL1	exigua_egg	350.79	4.88703	177.838	6.15481	0.576191	10.6819	1.2371e-26	8.80312e-26
5	maker-tulip_contig_77_pilon_pilon-augustus-gene-0.105-mRNA-1	exigua_EL1	exigua_egg	1518.5	94.9891	806.745	3.99466	0.374058	10.6792	1.27297e-26	9.05289e-26
6	maker-tulip_contig_218_pilon_pilon-augustus-gene-0.99-mRNA-1	exigua_EL1	exigua_egg	1384.5	0	692.249	12.7914	1.19804	10.677	1.30437e-26	9.27061e-26
1	maker-tulip_contig_781_pilon_pilon-augustus-gene-5.5-mRNA-1	exigua_EL1	exigua_egg	209.376	10.1889	109.782	4.35651	0.408156	10.6736	1.35222e-26	9.60491e-26
4	augustus_masked-tulip_contig_363_pilon_pilon-processed-gene-0.6-mRNA-1	exigua_EL1	exigua_egg	1360.61	0	680.303	12.7663	1.19611	10.6732	1.35881e-26	9.6401e-26
1	maker-tulip_contig_281_pilon_pilon-augustus-gene-3.40-mRNA-1	exigua_EL1	exigua_egg	26.1692	230.958	128.564	-3.14276	0.294592	-10.6682	1.43426e-26	1.01693e-25
1	maker-tulip_contig_781_pilon_pilon-augustus-gene-3.26-mRNA-1	exigua_EL1	exigua_egg	1645.98	358.954	1002.46	2.19836	0.206094	10.6668	1.45559e-26	1.03143e-25
1	augustus_masked-tulip_contig_161_pilon_pilon-processed-gene-0.21-mRNA-1	exigua_EL1	exigua_egg	251.34	25.9356	138.638	3.28031	0.307533	10.6665	1.4595e-26	1.03358e-25
8	augustus_masked-tulip_contig_145_pilon_pilon-processed-gene-3.30-mRNA-1	exigua_EL1	exigua_egg	2.11922	181.146	91.6325	-6.41066	0.601323	-10.6609	1.55049e-26	1.09736e-25
1	maker-tulip_contig_507_pilon_pilon-augustus-gene-0.77-mRNA-1	exigua_EL1	exigua_egg	93.7369	473.01	283.373	-2.3352	0.219107	-10.6578	1.60306e-26	1.1332e-25
1	augustus_masked-tulip_contig_434_pilon_pilon-processed-gene-0.30-mRNA-1	exigua_EL1	exigua_egg	31.0865	249.838	140.462	-3.00646	0.282253	-10.6516	1.71333e-26	1.20908e-25
8	augustus_masked-tulip_contig_661_pilon_pilon-processed-gene-0.16-mRNA-1	exigua_EL1	exigua_egg	0	1134.37	567.186	-12.7217	1.19434	-10.6516	1.71348e-26	1.20908e-25
1	augustus_masked-tulip_contig_773_pilon_pilon-processed-gene-1.19-mRNA-1	exigua_EL1	exigua_egg	38.9574	261.451	150.204	-2.74741	0.257952	-10.6509	1.72736e-26	1.21815e-25
6	augustus_masked-tulip_contig_44_pilon_pilon-processed-gene-6.13-mRNA-1	exigua_EL1	exigua_egg	469.964	1.37973	235.672	8.3803	0.786875	10.6501	1.7417e-26	1.22752e-25
3	maker-tulip_contig_289_pilon_pilon-augustus-gene-0.141-mRNA-1	exigua_EL1	exigua_egg	814.299	40.6308	427.465	4.33533	0.407189	10.647	1.80154e-26	1.26818e-25
4	augustus_masked-tulip_contig_60_pilon_pilon-processed-gene-0.8-mRNA-1	exigua_EL1	exigua_egg	1336.5	0	668.249	12.7404	1.197	10.6436	1.86812e-26	1.31427e-25
5	augustus_masked-tulip_contig_527_pilon_pilon-processed-gene-3.5-mRNA-1	exigua_EL1	exigua_egg	220.728	10.445	115.586	4.41771	0.4152	10.64	1.94202e-26	1.36462e-25
5	augustus_masked-tulip_contig_85_pilon_pilon-processed-gene-0.16-mRNA-1	exigua_EL1	exigua_egg	2342.99	453.881	1398.43	2.36724	0.222662	10.6316	2.12536e-26	1.49168e-25
1	maker-tulip_contig_783_pilon_pilon-augustus-gene-0.48-mRNA-1	exigua_EL1	exigua_egg	179.32	4.77655	92.048	5.19091	0.488261	10.6314	2.12854e-26	1.49302e-25
3	augustus_masked-tulip_contig_867_pilon_pilon-processed-gene-0.22-mRNA-1	exigua_EL1	exigua_egg	171.876	11.0184	91.4473	3.969	0.373467	10.6275	2.22082e-26	1.55497e-25
4	augustus_masked-tulip_contig_145_pilon_pilon-processed-gene-4.0-mRNA-1	exigua_EL1	exigua_egg	575.579	0.999842	288.29	9.0871	0.855476	10.6223	2.3477e-26	1.64186e-25
6	maker-tulip_contig_839_pilon_pilon-augustus-gene-1.33-mRNA-1	exigua_EL1	exigua_egg	1282.53	0	641.265	12.681	1.19512	10.6107	2.65665e-26	1.85572e-25
-	augustus_masked-tulip_contig_515_pilon_pilon-processed-gene-1.12-mRNA-1	exigua_EL1	exigua_egg	1331.12	0	665.56	12.7347	1.20065	10.6065	2.77863e-26	1.93978e-25
5	augustus_masked-tulip_contig_157_pilon_pilon-processed-gene-0.6-mRNA-1	exigua_EL1	exigua_egg	156.811	5.6235	81.2173	4.79577	0.452372	10.6014	2.93588e-26	2.04713e-25
1	augustus_masked-tulip_contig_934_pilon_pilon-processed-gene-3.27-mRNA-1	exigua_EL1	exigua_egg	14.8689	178.475	96.6718	-3.58318	0.338015	-10.6006	2.95935e-26	2.06227e-25
1	maker-tulip_contig_236_pilon_pilon-augustus-gene-2.4-mRNA-1	exigua_EL1	exigua_egg	572.952	1.01149	286.982	9.08032	0.856665	10.5996	2.99222e-26	2.08395e-25
3	augustus_masked-tulip_contig_76_pilon_pilon-processed-gene-1.30-mRNA-1	exigua_EL1	exigua_egg	167.139	8.69294	87.9159	4.2488	0.400941	10.5971	3.07493e-26	2.14028e-25
1	maker-tulip_contig_272_pilon_pilon-augustus-gene-1.6-mRNA-1	exigua_EL1	exigua_egg	44.3438	259.214	151.779	-2.54566	0.240235	-10.5965	3.09182e-26	2.15077e-25
4	maker-tulip_contig_516_pilon_pilon-augustus-gene-3.29-mRNA-1	exigua_EL1	exigua_egg	1202.57	0	601.283	12.5881	1.18874	10.5894	3.33771e-26	2.32045e-25
11	maker-tulip_contig_327_pilon_pilon-augustus-gene-2.20-mRNA-1	exigua_EL1	exigua_egg	800.646	3958.14	2379.39	-2.30559	0.217728	-10.5893	3.34031e-26	2.32088e-25
1	maker-tulip_contig_126_pilon_pilon-augustus-gene-2.210-mRNA-1	exigua_EL1	exigua_egg	50.1147	329.901	190.008	-2.71868	0.256783	-10.5875	3.40735e-26	2.36468e-25
1	maker-tulip_contig_145_pilon_pilon-augustus-gene-5.42-mRNA-1	exigua_EL1	exigua_egg	150.1	1787.17	968.632	-3.57433	0.337682	-10.5849	3.50202e-26	2.42895e-25
1	maker-tulip_contig_645_pilon_pilon-augustus-gene-0.0-mRNA-1	exigua_EL1	exigua_egg	229.097	1046.82	637.956	-2.19152	0.207075	-10.5832	3.56466e-26	2.47094e-25
1	maker-tulip_contig_800_pilon_pilon-augustus-gene-1.21-mRNA-1	exigua_EL1	exigua_egg	997.636	136.535	567.086	2.87209	0.271414	10.582	3.61327e-26	2.50316e-25
1	maker-tulip_contig_916_pilon_pilon-augustus-gene-3.58-mRNA-1	exigua_EL1	exigua_egg	268.418	1.68971	135.054	7.25116	0.686196	10.5672	4.22996e-26	2.92694e-25
4	maker-tulip_contig_687_pilon_pilon-augustus-gene-0.23-mRNA-1	exigua_EL1	exigua_egg	1248.45	0	624.223	12.6421	1.1964	10.5668	4.24828e-26	2.9379e-25
1	maker-tulip_contig_375_pilon_pilon-augustus-gene-0.0-mRNA-1	exigua_EL1	exigua_egg	60.8538	487.958	274.406	-3.00409	0.284373	-10.5639	4.38047e-26	3.02753e-25
1	maker-tulip_contig_236_pilon_pilon-augustus-gene-8.40-mRNA-1	exigua_EL1	exigua_egg	559.317	1.02315	280.17	9.04515	0.856437	10.5614	4.50079e-26	3.10887e-25
1	maker-tulip_contig_640_pilon_pilon-augustus-gene-2.22-mRNA-1	exigua_EL1	exigua_egg	941.036	33.6139	487.325	4.81345	0.455767	10.5612	4.50828e-26	3.11222e-25
1	maker-tulip_contig_626_pilon_pilon-augustus-gene-0.8-mRNA-1	exigua_EL1	exigua_egg	49.5641	273.582	161.573	-2.46515	0.233566	-10.5544	4.84784e-26	3.34271e-25
6	maker-tulip_contig_638_pilon_pilon-augustus-gene-0.0-mRNA-1	exigua_EL1	exigua_egg	1487.33	0	743.666	12.8946	1.22207	10.5515	5.00046e-26	3.44593e-25
1	maker-tulip_contig_340_pilon_pilon-augustus-gene-0.24-mRNA-1	exigua_EL1	exigua_egg	84.7787	402.406	243.592	-2.24523	0.212837	-10.549	5.13146e-26	3.53414e-25
-	augustus_masked-tulip_contig_515_pilon_pilon-processed-gene-1.7-mRNA-1	exigua_EL1	exigua_egg	1536.07	0	768.035	12.9413	1.22697	10.5473	5.22672e-26	3.59764e-25
1	maker-tulip_contig_3_pilon_pilon-augustus-gene-3.23-mRNA-1	exigua_EL1	exigua_egg	497.585	2258.15	1377.87	-2.18204	0.206889	-10.5469	5.24803e-26	3.6102e-25
5	maker-tulip_contig_773_pilon_pilon-augustus-gene-2.34-mRNA-1	exigua_EL1	exigua_egg	1182.8	0	591.4	12.5642	1.19333	10.5287	6.37126e-26	4.37523e-25
1	maker-tulip_contig_491_pilon_pilon-augustus-gene-1.66-mRNA-1	exigua_EL1	exigua_egg	123.226	569.523	346.374	-2.20757	0.209708	-10.5269	6.49442e-26	4.45721e-25
1	maker-tulip_contig_42_pilon_pilon-augustus-gene-1.33-mRNA-1	exigua_EL1	exigua_egg	75.3983	379.809	227.604	-2.33132	0.221646	-10.5182	7.12081e-26	4.88426e-25
1	maker-tulip_contig_895_pilon_pilon-augustus-gene-2.26-mRNA-1	exigua_EL1	exigua_egg	451.074	3985.03	2218.05	-3.14303	0.298914	-10.5148	7.382e-26	5.06047e-25
3	maker-tulip_contig_424_pilon_pilon-augustus-gene-0.72-mRNA-1	exigua_EL1	exigua_egg	1134.64	0	567.321	12.5043	1.19021	10.5059	8.11033e-26	5.55329e-25
1	augustus_masked-tulip_contig_479_pilon_pilon-processed-gene-1.10-mRNA-1	exigua_EL1	exigua_egg	3.69374	169.944	86.819	-5.53718	0.52725	-10.502	8.45719e-26	5.78407e-25
5	maker-tulip_contig_711_pilon_pilon-augustus-gene-0.39-mRNA-1	exigua_EL1	exigua_egg	236.251	1.99968	119.125	6.80789	0.648468	10.4984	8.78444e-26	6.0044e-25
5	augustus_masked-tulip_contig_91_pilon_pilon-processed-gene-0.8-mRNA-1	exigua_EL1	exigua_egg	170.107	14.6538	92.3805	3.54757	0.337962	10.497	8.92134e-26	6.09444e-25
3	maker-tulip_contig_407_pilon_pilon-augustus-gene-1.23-mRNA-1	exigua_EL1	exigua_egg	524.238	1.15692	262.698	8.94744	0.852496	10.4956	9.05281e-26	6.18067e-25
1	maker-tulip_contig_815_pilon_pilon-augustus-gene-0.2-mRNA-1	exigua_EL1	exigua_egg	154.277	4.95694	79.6171	4.96254	0.472955	10.4926	9.33881e-26	6.37224e-25
12	maker-tulip_contig_290_pilon_pilon-augustus-gene-3.18-mRNA-1	exigua_EL1	exigua_egg	18.2772	186.526	102.402	-3.35037	0.319519	-10.4857	1.00539e-25	6.85116e-25
1	maker-tulip_contig_516_pilon_pilon-augustus-gene-3.56-mRNA-1	exigua_EL1	exigua_egg	181.673	3.40847	92.5408	5.69274	0.54291	10.4856	1.00581e-25	6.85116e-25
-	maker-tulip_contig_43_pilon_pilon-augustus-gene-0.30-mRNA-1	exigua_EL1	exigua_egg	552.252	2.85829	277.555	7.60502	0.725366	10.4844	1.0189e-25	6.93626e-25
1	maker-tulip_contig_632_pilon_pilon-augustus-gene-3.36-mRNA-1	exigua_EL1	exigua_egg	527.483	1.06386	264.273	8.95923	0.854592	10.4836	1.02722e-25	6.98887e-25
1	maker-tulip_contig_490_pilon_pilon-augustus-gene-2.68-mRNA-1	exigua_EL1	exigua_egg	64.7579	300.339	182.548	-2.21192	0.2111	-10.4781	1.08922e-25	7.40644e-25
1	maker-tulip_contig_303_pilon_pilon-augustus-gene-1.24-mRNA-1	exigua_EL1	exigua_egg	28.2708	194.436	111.353	-2.78052	0.265537	-10.4713	1.17008e-25	7.94708e-25
5	maker-tulip_contig_479_pilon_pilon-augustus-gene-3.17-mRNA-1	exigua_EL1	exigua_egg	1585.02	0	792.512	12.9864	1.24071	10.4669	1.22573e-25	8.3155e-25
1	maker-tulip_contig_529_pilon_pilon-augustus-gene-1.45-mRNA-1	exigua_EL1	exigua_egg	45.3315	307.789	176.56	-2.76188	0.263899	-10.4657	1.24207e-25	8.42148e-25
1	augustus_masked-tulip_contig_507_pilon_pilon-processed-gene-2.12-mRNA-1	exigua_EL1	exigua_egg	476.29	107.876	292.083	2.14417	0.204967	10.4611	1.30368e-25	8.82906e-25
1	maker-tulip_contig_199_pilon_pilon-augustus-gene-4.140-mRNA-1	exigua_EL1	exigua_egg	118.627	525.768	322.198	-2.14707	0.205342	-10.4561	1.37458e-25	9.30388e-25
5	maker-tulip_contig_451_pilon_pilon-augustus-gene-0.23-mRNA-1	exigua_EL1	exigua_egg	1046.59	44.8788	545.733	4.53991	0.43426	10.4544	1.39916e-25	9.46299e-25
1	augustus_masked-tulip_contig_202_pilon_pilon-processed-gene-0.1-mRNA-1	exigua_EL1	exigua_egg	25.9802	225.204	125.592	-3.11951	0.298496	-10.4508	1.45343e-25	9.82065e-25
12	augustus_masked-tulip_contig_753_pilon_pilon-processed-gene-1.15-mRNA-1	exigua_EL1	exigua_egg	0	1370.08	685.039	-12.9934	1.24356	-10.4486	1.48677e-25	1.00401e-24
1	maker-tulip_contig_818_pilon_pilon-augustus-gene-0.27-mRNA-1	exigua_EL1	exigua_egg	149.204	909.408	529.306	-2.60833	0.24982	-10.4408	1.61427e-25	1.08949e-24
1	maker-tulip_contig_59_pilon_pilon-augustus-gene-1.84-mRNA-1	exigua_EL1	exigua_egg	101.222	446.803	274.012	-2.14227	0.205263	-10.4367	1.68482e-25	1.13646e-24
1	maker-tulip_contig_247_pilon_pilon-augustus-gene-2.39-mRNA-1	exigua_EL1	exigua_egg	1158.5	0	579.249	12.5343	1.20116	10.4351	1.71363e-25	1.15523e-24
5	maker-tulip_contig_655_pilon_pilon-augustus-gene-0.26-mRNA-1	exigua_EL1	exigua_egg	215.685	2.10441	108.894	6.66985	0.6393	10.4331	1.75172e-25	1.17956e-24
6	maker-tulip_contig_218_pilon_pilon-augustus-gene-1.105-mRNA-1	exigua_EL1	exigua_egg	2214.03	0.333281	1107.18	12.5069	1.19924	10.429	1.82723e-25	1.2297e-24
1	maker-tulip_contig_195_pilon_pilon-augustus-gene-0.18-mRNA-1	exigua_EL1	exigua_egg	212.748	868.048	540.398	-2.02959	0.194647	-10.4271	1.86539e-25	1.25466e-24
1	maker-tulip_contig_81_pilon_pilon-augustus-gene-5.10-mRNA-1	exigua_EL1	exigua_egg	272.79	37.2391	155.014	2.88123	0.276327	10.4269	1.86926e-25	1.25655e-24
1	maker-tulip_contig_199_pilon_pilon-augustus-gene-3.59-mRNA-1	exigua_EL1	exigua_egg	32.2032	274.104	153.153	-3.0898	0.296359	-10.4259	1.88905e-25	1.26913e-24
-	augustus_masked-tulip_contig_515_pilon_pilon-processed-gene-1.14-mRNA-1	exigua_EL1	exigua_egg	1078.13	0	539.063	12.4306	1.19356	10.4147	2.12524e-25	1.42618e-24
4	maker-tulip_contig_827_pilon_pilon-augustus-gene-1.23-mRNA-1	exigua_EL1	exigua_egg	659.748	21.1116	340.43	4.95134	0.475524	10.4124	2.177e-25	1.46009e-24
-	maker-tulip_contig_441_pilon_pilon-augustus-gene-4.72-mRNA-1	exigua_EL1	exigua_egg	210.898	3.59461	107.246	5.89464	0.566249	10.41	2.233e-25	1.4968e-24
3	maker-tulip_contig_66_pilon_pilon-augustus-gene-0.35-mRNA-1	exigua_EL1	exigua_egg	377.637	71.7911	224.714	2.39074	0.229717	10.4073	2.29594e-25	1.53811e-24
1	maker-tulip_contig_34_pilon_pilon-augustus-gene-0.125-mRNA-1	exigua_EL1	exigua_egg	202.667	11.6849	107.176	4.11882	0.396132	10.3976	2.54221e-25	1.70212e-24
5	maker-tulip_contig_372_pilon_pilon-augustus-gene-1.109-mRNA-1	exigua_EL1	exigua_egg	305.689	26.7454	166.217	3.50466	0.337111	10.3962	2.58078e-25	1.72697e-24
1	maker-tulip_contig_455_pilon_pilon-augustus-gene-1.28-mRNA-1	exigua_EL1	exigua_egg	211.247	2.087	106.667	6.64064	0.638783	10.3958	2.59173e-25	1.73331e-24
11	augustus_masked-tulip_contig_477_pilon_pilon-processed-gene-0.8-mRNA-1	exigua_EL1	exigua_egg	2.47606	1814.39	908.432	-9.52869	0.916836	-10.393	2.6681e-25	1.78236e-24
1	maker-tulip_contig_559_pilon_pilon-augustus-gene-0.3-mRNA-1	exigua_EL1	exigua_egg	495.906	2.23243	249.069	7.85166	0.755967	10.3862	2.86404e-25	1.91218e-24
3	maker-tulip_contig_323_pilon_pilon-augustus-gene-7.0-mRNA-1	exigua_EL1	exigua_egg	196.403	12.4389	104.421	3.98613	0.38386	10.3843	2.92212e-25	1.94984e-24
3	augustus_masked-tulip_contig_194_pilon_pilon-processed-gene-1.30-mRNA-1	exigua_EL1	exigua_egg	874.919	70.2884	472.604	3.63191	0.349794	10.383	2.96338e-25	1.97626e-24
1	maker-tulip_contig_821_pilon_pilon-augustus-gene-0.10-mRNA-1	exigua_EL1	exigua_egg	582.823	129.553	356.188	2.16633	0.208757	10.3773	3.14602e-25	2.09687e-24
5	augustus_masked-tulip_contig_236_pilon_pilon-processed-gene-0.57-mRNA-1	exigua_EL1	exigua_egg	290.955	25.1195	158.037	3.52604	0.340085	10.3681	3.46228e-25	2.30636e-24
1	maker-tulip_contig_809_pilon_pilon-augustus-gene-3.12-mRNA-1	exigua_EL1	exigua_egg	948.39	70.9714	509.681	3.7467	0.361381	10.3677	3.47713e-25	2.31494e-24
1	maker-tulip_contig_132_pilon_pilon-augustus-gene-1.31-mRNA-1	exigua_EL1	exigua_egg	201.79	12.9582	107.374	3.97659	0.383683	10.3643	3.6053e-25	2.39892e-24
1	maker-tulip_contig_716_pilon_pilon-augustus-gene-1.89-mRNA-1	exigua_EL1	exigua_egg	129.373	733.246	431.31	-2.50287	0.241564	-10.3611	3.72623e-25	2.47798e-24
1	maker-tulip_contig_279_pilon_pilon-augustus-gene-2.5-mRNA-1	exigua_EL1	exigua_egg	194.091	2.95136	98.5211	6.09326	0.588102	10.3609	3.73431e-25	2.48196e-24
1	maker-tulip_contig_185_pilon_pilon-augustus-gene-0.16-mRNA-1	exigua_EL1	exigua_egg	153.456	4.19141	78.8236	5.18069	0.500074	10.3598	3.77626e-25	2.50842e-24
1	maker-tulip_contig_327_pilon_pilon-augustus-gene-1.26-mRNA-1	exigua_EL1	exigua_egg	6.05818	142.582	74.3198	-4.55159	0.439353	-10.3598	3.77874e-25	2.50866e-24
-	augustus_masked-tulip_contig_272_pilon_pilon-processed-gene-4.80-mRNA-1	exigua_EL1	exigua_egg	46.9172	257.713	152.315	-2.45781	0.237276	-10.3584	3.83163e-25	2.54234e-24
1	maker-tulip_contig_190_pilon_pilon-augustus-gene-3.2-mRNA-1	exigua_EL1	exigua_egg	202.731	5.6235	104.177	5.16707	0.499217	10.3503	4.16972e-25	2.76511e-24
5	maker-tulip_contig_586_pilon_pilon-augustus-gene-10.54-mRNA-1	exigua_EL1	exigua_egg	250.765	14.4136	132.589	4.13545	0.399632	10.3482	4.26626e-25	2.82754e-24
1	augustus_masked-tulip_contig_512_pilon_pilon-processed-gene-0.53-mRNA-1	exigua_EL1	exigua_egg	206.524	876.731	541.627	-2.08576	0.201568	-10.3477	4.28839e-25	2.8406e-24
1	maker-tulip_contig_82_pilon_pilon-augustus-gene-1.31-mRNA-1	exigua_EL1	exigua_egg	7.58359	185.711	96.6472	-4.60995	0.445842	-10.3399	4.65209e-25	3.07806e-24
1	augustus_masked-tulip_contig_691_pilon_pilon-processed-gene-4.95-mRNA-1	exigua_EL1	exigua_egg	54.486	342.818	198.652	-2.65431	0.256721	-10.3393	4.67976e-25	3.09463e-24
1	augustus_masked-tulip_contig_113_pilon_pilon-processed-gene-0.66-mRNA-1	exigua_EL1	exigua_egg	266.699	1245.85	756.276	-2.22411	0.215276	-10.3314	5.07933e-25	3.35321e-24
3	maker-tulip_contig_43_pilon_pilon-augustus-gene-6.18-mRNA-1	exigua_EL1	exigua_egg	305.326	12.1636	158.745	4.65839	0.451199	10.3245	5.46254e-25	3.60417e-24
1	maker-tulip_contig_667_pilon_pilon-augustus-gene-0.84-mRNA-1	exigua_EL1	exigua_egg	218.437	913.175	565.806	-2.06299	0.199932	-10.3185	5.81479e-25	3.82992e-24
1	maker-tulip_contig_819_pilon_pilon-augustus-gene-0.38-mRNA-1	exigua_EL1	exigua_egg	5770.07	972.15	3371.11	2.56882	0.248954	10.3184	5.81641e-25	3.82992e-24
5	maker-tulip_contig_732_pilon_pilon-augustus-gene-6.19-mRNA-1	exigua_EL1	exigua_egg	1018.1	231.982	625.043	2.13179	0.206636	10.3167	5.9244e-25	3.898e-24
1	maker-tulip_contig_691_pilon_pilon-augustus-gene-3.14-mRNA-1	exigua_EL1	exigua_egg	469.903	1921.48	1195.69	-2.03214	0.197006	-10.3151	6.02156e-25	3.95972e-24
1	augustus_masked-tulip_contig_690_pilon_pilon-processed-gene-5.18-mRNA-1	exigua_EL1	exigua_egg	163.235	6.31337	84.7739	4.68505	0.454288	10.3129	6.15875e-25	4.04767e-24
1	maker-tulip_contig_674_pilon_pilon-augustus-gene-5.12-mRNA-1	exigua_EL1	exigua_egg	72.2459	332.185	202.215	-2.20021	0.213354	-10.3125	6.18979e-25	4.0658e-24
1	augustus_masked-tulip_contig_390_pilon_pilon-processed-gene-0.25-mRNA-1	exigua_EL1	exigua_egg	67.9408	487.169	277.555	-2.84081	0.275548	-10.3097	6.37114e-25	4.18259e-24
12	augustus_masked-tulip_contig_59_pilon_pilon-processed-gene-1.10-mRNA-1	exigua_EL1	exigua_egg	1.52369	255.954	128.739	-7.39295	0.717176	-10.3084	6.45532e-25	4.23549e-24
1	maker-tulip_contig_182_pilon_pilon-augustus-gene-1.71-mRNA-1	exigua_EL1	exigua_egg	237.917	1095.15	666.533	-2.20275	0.213721	-10.3067	6.57477e-25	4.31147e-24
1	maker-tulip_contig_39_pilon_pilon-augustus-gene-1.212-mRNA-1	exigua_EL1	exigua_egg	194.113	9.00121	101.557	4.44753	0.4317	10.3024	6.87424e-25	4.50534e-24
3	maker-tulip_contig_236_pilon_pilon-augustus-gene-3.0-mRNA-1	exigua_EL1	exigua_egg	313.357	1.34478	157.351	7.79614	0.756911	10.2999	7.05028e-25	4.61815e-24
5	maker-tulip_contig_58_pilon_pilon-augustus-gene-2.2-mRNA-1	exigua_EL1	exigua_egg	270.5	21.6356	146.068	3.63602	0.353094	10.2976	7.22397e-25	4.72929e-24
5	augustus_masked-tulip_contig_420_pilon_pilon-processed-gene-2.30-mRNA-1	exigua_EL1	exigua_egg	519.544	48.4346	283.989	3.4155	0.331764	10.295	7.42343e-25	4.85718e-24
7	maker-tulip_contig_479_pilon_pilon-augustus-gene-1.25-mRNA-1	exigua_EL1	exigua_egg	368.266	1.46115	184.864	8.02189	0.779254	10.2943	7.47448e-25	4.88786e-24
3	maker-tulip_contig_623_pilon_pilon-augustus-gene-4.38-mRNA-1	exigua_EL1	exigua_egg	1274.53	0	637.266	12.6719	1.23109	10.2933	7.55626e-25	4.9386e-24
12	augustus_masked-tulip_contig_753_pilon_pilon-processed-gene-1.13-mRNA-1	exigua_EL1	exigua_egg	58.476	919.516	488.996	-3.97471	0.38616	-10.2929	7.58509e-25	4.9547e-24
1	maker-tulip_contig_175_pilon_pilon-augustus-gene-2.4-mRNA-1	exigua_EL1	exigua_egg	9.69749	212.129	110.913	-4.44723	0.432159	-10.2907	7.75972e-25	5.06316e-24
1	augustus_masked-tulip_contig_716_pilon_pilon-processed-gene-0.5-mRNA-1	exigua_EL1	exigua_egg	235.12	22.9477	129.034	3.36732	0.32726	10.2894	7.86317e-25	5.12782e-24
1	augustus_masked-tulip_contig_842_pilon_pilon-processed-gene-0.98-mRNA-1	exigua_EL1	exigua_egg	155.159	4.3718	79.7652	5.18581	0.504114	10.287	8.06663e-25	5.25759e-24
1	maker-tulip_contig_448_pilon_pilon-augustus-gene-1.17-mRNA-1	exigua_EL1	exigua_egg	158.224	729.489	443.856	-2.20598	0.214474	-10.2855	8.19213e-25	5.33643e-24
1	maker-tulip_contig_130_pilon_pilon-augustus-gene-0.28-mRNA-1	exigua_EL1	exigua_egg	489.691	0.999842	245.345	8.85471	0.861152	10.2824	8.45901e-25	5.50724e-24
3	augustus_masked-tulip_contig_702_pilon_pilon-processed-gene-0.27-mRNA-1	exigua_EL1	exigua_egg	684.186	123.194	403.69	2.47557	0.240783	10.2813	8.55354e-25	5.5657e-24
3	maker-tulip_contig_126_pilon_pilon-augustus-gene-2.35-mRNA-1	exigua_EL1	exigua_egg	311.475	53.9499	182.712	2.525	0.245809	10.2722	9.40094e-25	6.11372e-24
11	augustus_masked-tulip_contig_362_pilon_pilon-processed-gene-7.5-mRNA-1	exigua_EL1	exigua_egg	0	804.204	402.102	-12.2253	1.1904	-10.2699	9.63061e-25	6.25618e-24
1	maker-tulip_contig_89_pilon_pilon-augustus-gene-0.15-mRNA-1	exigua_EL1	exigua_egg	103.11	558.679	330.894	-2.43726	0.237423	-10.2654	1.00855e-24	6.54809e-24
1	augustus_masked-tulip_contig_610_pilon_pilon-processed-gene-1.70-mRNA-1	exigua_EL1	exigua_egg	147.328	630.088	388.708	-2.09577	0.204224	-10.2621	1.04402e-24	6.77462e-24
3	maker-tulip_contig_192_pilon_pilon-augustus-gene-1.167-mRNA-1	exigua_EL1	exigua_egg	1115.04	0.771283	557.904	10.6222	1.03513	10.2617	1.04847e-24	6.79976e-24
1	maker-tulip_contig_72_pilon_pilon-augustus-gene-1.0-mRNA-1	exigua_EL1	exigua_egg	1098.68	0.718922	549.701	10.6025	1.03394	10.2545	1.12943e-24	7.32081e-24
5	maker-tulip_contig_702_pilon_pilon-augustus-gene-0.38-mRNA-1	exigua_EL1	exigua_egg	795.497	84.3995	439.948	3.23144	0.315333	10.2477	1.21168e-24	7.84354e-24
1	augustus_masked-tulip_contig_669_pilon_pilon-processed-gene-2.25-mRNA-1	exigua_EL1	exigua_egg	185.846	2.39123	94.1188	6.23653	0.608579	10.2477	1.21207e-24	7.84354e-24
6	maker-tulip_contig_916_pilon_pilon-augustus-gene-1.12-mRNA-1	exigua_EL1	exigua_egg	1796.5	0.385642	898.444	12.2054	1.19172	10.2418	1.28757e-24	8.31382e-24
5	maker-tulip_contig_331_pilon_pilon-augustus-gene-2.12-mRNA-1	exigua_EL1	exigua_egg	657.187	127.848	392.517	2.3585	0.230373	10.2377	1.34325e-24	8.66384e-24
5	maker-tulip_contig_322_pilon_pilon-augustus-gene-0.33-mRNA-1	exigua_EL1	exigua_egg	272.368	41.7714	157.07	2.7059	0.264446	10.2323	1.42057e-24	9.14754e-24
1	maker-tulip_contig_598_pilon_pilon-augustus-gene-0.74-mRNA-1	exigua_EL1	exigua_egg	29.7153	226.611	128.163	-2.92785	0.28616	-10.2315	1.43285e-24	9.22156e-24
3	augustus_masked-tulip_contig_68_pilon_pilon-processed-gene-0.73-mRNA-1	exigua_EL1	exigua_egg	435.013	101.434	268.223	2.09748	0.205035	10.2299	1.45732e-24	9.37391e-24
3	maker-tulip_contig_196_pilon_pilon-augustus-gene-4.29-mRNA-1	exigua_EL1	exigua_egg	472.145	1.15692	236.651	8.79532	0.860529	10.2208	1.59973e-24	1.02787e-23
5	augustus_masked-tulip_contig_209_pilon_pilon-processed-gene-2.4-mRNA-1	exigua_EL1	exigua_egg	192.055	5.23786	98.6463	5.18396	0.507749	10.2097	1.79422e-24	1.1497e-23
5	maker-tulip_contig_216_pilon_pilon-augustus-gene-0.54-mRNA-1	exigua_EL1	exigua_egg	230.415	28.5628	129.489	3.0024	0.294104	10.2086	1.81384e-24	1.16165e-23
12	maker-tulip_contig_674_pilon_pilon-augustus-gene-1.44-mRNA-1	exigua_EL1	exigua_egg	0.922834	401.206	201.064	-8.7788	0.860448	-10.2026	1.93043e-24	1.23564e-23
1	maker-tulip_contig_56_pilon_pilon-augustus-gene-0.49-mRNA-1	exigua_EL1	exigua_egg	148.501	654.405	401.453	-2.13958	0.209736	-10.2013	1.95652e-24	1.25166e-23
6	maker-tulip_contig_916_pilon_pilon-augustus-gene-2.69-mRNA-1	exigua_EL1	exigua_egg	1791.08	0.385642	895.735	12.2011	1.19693	10.1936	2.11696e-24	1.35283e-23
1	maker-tulip_contig_711_pilon_pilon-augustus-gene-1.21-mRNA-1	exigua_EL1	exigua_egg	87.4646	534.476	310.97	-2.61139	0.256189	-10.1932	2.1257e-24	1.35768e-23
1	maker-tulip_contig_381_pilon_pilon-augustus-gene-0.118-mRNA-1	exigua_EL1	exigua_egg	185.637	791.644	488.641	-2.09191	0.205235	-10.1927	2.13657e-24	1.36389e-23
1	augustus_masked-tulip_contig_211_pilon_pilon-processed-gene-2.83-mRNA-1	exigua_EL1	exigua_egg	86.8542	414.243	250.549	-2.25424	0.221283	-10.1872	2.26253e-24	1.44273e-23
1	maker-tulip_contig_276_pilon_pilon-augustus-gene-3.0-mRNA-1	exigua_EL1	exigua_egg	398.067	1595.97	997.019	-2.00362	0.196787	-10.1817	2.39452e-24	1.52607e-23
5	maker-tulip_contig_799_pilon_pilon-augustus-gene-0.85-mRNA-1	exigua_EL1	exigua_egg	152.24	8.34801	80.2941	4.17317	0.410019	10.178	2.48681e-24	1.58232e-23
3	maker-tulip_contig_809_pilon_pilon-augustus-gene-4.20-mRNA-1	exigua_EL1	exigua_egg	190.761	6.2436	98.5021	4.91497	0.48292	10.1776	2.496e-24	1.58731e-23
3	maker-tulip_contig_473_pilon_pilon-augustus-gene-2.14-mRNA-1	exigua_EL1	exigua_egg	221.424	3.41841	112.421	6.099	0.599446	10.1744	2.57994e-24	1.63981e-23
1	maker-tulip_contig_781_pilon_pilon-augustus-gene-1.44-mRNA-1	exigua_EL1	exigua_egg	397.949	1.54257	199.746	8.12425	0.798672	10.1722	2.63859e-24	1.67618e-23
1	maker-tulip_contig_320_pilon_pilon-augustus-gene-3.44-mRNA-1	exigua_EL1	exigua_egg	33.3618	260.613	146.988	-2.96415	0.291745	-10.1601	2.98904e-24	1.89656e-23
8	maker-tulip_contig_360_pilon_pilon-augustus-gene-2.37-mRNA-1	exigua_EL1	exigua_egg	5.45492	166.292	85.8734	-4.92438	0.485026	-10.1528	3.2193e-24	2.04068e-23
5	augustus_masked-tulip_contig_44_pilon_pilon-processed-gene-6.16-mRNA-1	exigua_EL1	exigua_egg	852.946	0	426.473	12.0925	1.19163	10.1478	3.38801e-24	2.14416e-23
3	maker-tulip_contig_343_pilon_pilon-augustus-gene-0.25-mRNA-1	exigua_EL1	exigua_egg	222.515	2.26149	112.388	6.7032	0.660894	10.1426	3.57336e-24	2.25904e-23
3	augustus_masked-tulip_contig_690_pilon_pilon-processed-gene-3.84-mRNA-1	exigua_EL1	exigua_egg	854.409	0	427.204	12.0951	1.19273	10.1407	3.64664e-24	2.30413e-23
6	augustus_masked-tulip_contig_916_pilon_pilon-processed-gene-2.199-mRNA-1	exigua_EL1	exigua_egg	1766.85	0.385642	883.619	12.1814	1.2013	10.1402	3.66355e-24	2.31357e-23
3	maker-tulip_contig_661_pilon_pilon-augustus-gene-1.14-mRNA-1	exigua_EL1	exigua_egg	209.265	18.7015	113.983	3.46947	0.342191	10.139	3.70903e-24	2.34104e-23
5	maker-tulip_contig_837_pilon_pilon-augustus-gene-3.11-mRNA-1	exigua_EL1	exigua_egg	530.736	101.692	316.214	2.38472	0.235255	10.1368	3.79427e-24	2.39356e-23
1	augustus_masked-tulip_contig_507_pilon_pilon-processed-gene-0.17-mRNA-1	exigua_EL1	exigua_egg	28.2814	191.574	109.928	-2.75816	0.272129	-10.1355	3.84525e-24	2.42313e-23
5	augustus_masked-tulip_contig_323_pilon_pilon-processed-gene-4.27-mRNA-1	exigua_EL1	exigua_egg	863.91	0	431.955	12.1109	1.19527	10.1323	3.97124e-24	2.50118e-23
3	maker-tulip_contig_927_pilon_pilon-augustus-gene-0.3-mRNA-1	exigua_EL1	exigua_egg	1602.52	0.344933	801.431	12.0405	1.18837	10.132	3.98423e-24	2.50802e-23
6	maker-tulip_contig_224_pilon_pilon-augustus-gene-2.23-mRNA-1	exigua_EL1	exigua_egg	930.482	0	465.241	12.218	1.20631	10.1284	4.13488e-24	2.60147e-23
1	augustus_masked-tulip_contig_827_pilon_pilon-processed-gene-0.14-mRNA-1	exigua_EL1	exigua_egg	154.411	12.6732	83.5421	3.60356	0.3559	10.1252	4.27068e-24	2.68547e-23
1	maker-tulip_contig_841_pilon_pilon-augustus-gene-0.60-mRNA-1	exigua_EL1	exigua_egg	80.7818	441.814	261.298	-2.44961	0.241964	-10.1239	4.32935e-24	2.72091e-23
3	maker-tulip_contig_227_pilon_pilon-augustus-gene-0.9-mRNA-1	exigua_EL1	exigua_egg	195.674	2.11606	98.895	6.52868	0.645081	10.1207	4.4713e-24	2.80713e-23
1	maker-tulip_contig_828_pilon_pilon-augustus-gene-0.5-mRNA-1	exigua_EL1	exigua_egg	654.116	90.4246	372.27	2.85785	0.282414	10.1193	4.5344e-24	2.84371e-23
5	maker-tulip_contig_3_pilon_pilon-augustus-gene-2.29-mRNA-1	exigua_EL1	exigua_egg	4490.44	642.455	2566.45	2.80456	0.277323	10.113	4.83917e-24	3.03001e-23
5	maker-tulip_contig_586_pilon_pilon-augustus-gene-10.51-mRNA-1	exigua_EL1	exigua_egg	905.356	0	452.678	12.1786	1.20485	10.1081	5.08852e-24	3.18445e-23
5	augustus_masked-tulip_contig_537_pilon_pilon-processed-gene-1.25-mRNA-1	exigua_EL1	exigua_egg	362.066	80.2778	221.172	2.17824	0.215527	10.1066	5.16551e-24	3.23091e-23
1	maker-tulip_contig_855_pilon_pilon-augustus-gene-2.15-mRNA-1	exigua_EL1	exigua_egg	1005.8	28.6021	517.203	5.13586	0.508272	10.1046	5.27361e-24	3.29678e-23
5	maker-tulip_contig_187_pilon_pilon-augustus-gene-1.65-mRNA-1	exigua_EL1	exigua_egg	157.495	10.9078	84.2012	3.84838	0.38104	10.0997	5.5436e-24	3.46005e-23
1	maker-tulip_contig_145_pilon_pilon-augustus-gene-1.0-mRNA-1	exigua_EL1	exigua_egg	439.913	27.104	233.508	4.0248	0.398617	10.0969	5.70109e-24	3.55647e-23
1	maker-tulip_contig_168_pilon_pilon-augustus-gene-1.12-mRNA-1	exigua_EL1	exigua_egg	305.795	1.39714	153.596	7.75884	0.768446	10.0968	5.70776e-24	3.55874e-23
1	augustus_masked-tulip_contig_916_pilon_pilon-processed-gene-2.193-mRNA-1	exigua_EL1	exigua_egg	813.946	0	406.973	12.025	1.19155	10.092	5.99586e-24	3.7336e-23
5	augustus_masked-tulip_contig_114_pilon_pilon-processed-gene-0.26-mRNA-1	exigua_EL1	exigua_egg	145.232	9.78586	77.5089	3.88069	0.384534	10.0919	5.99771e-24	3.7336e-23
5	maker-tulip_contig_89_pilon_pilon-augustus-gene-4.20-mRNA-1	exigua_EL1	exigua_egg	319.205	48.5711	183.888	2.71428	0.269156	10.0844	6.47537e-24	4.02881e-23
5	maker-tulip_contig_628_pilon_pilon-augustus-gene-3.1-mRNA-1	exigua_EL1	exigua_egg	1027.2	0	513.6	12.3608	1.226	10.0822	6.62114e-24	4.11299e-23
3	maker-tulip_contig_361_pilon_pilon-augustus-gene-0.3-mRNA-1	exigua_EL1	exigua_egg	814.689	0	407.345	12.0264	1.19385	10.0736	7.22835e-24	4.48782e-23
3	maker-tulip_contig_326_pilon_pilon-augustus-gene-2.1-mRNA-1	exigua_EL1	exigua_egg	1093.61	0.689866	547.151	10.597	1.05223	10.071	7.42295e-24	4.60622e-23
5	maker-tulip_contig_934_pilon_pilon-augustus-gene-2.10-mRNA-1	exigua_EL1	exigua_egg	572.191	0.999842	286.595	9.08281	0.902018	10.0694	7.54108e-24	4.67706e-23
5	augustus_masked-tulip_contig_809_pilon_pilon-processed-gene-2.4-mRNA-1	exigua_EL1	exigua_egg	160.273	2.83498	81.5541	5.82506	0.578606	10.0674	7.69853e-24	4.7722e-23
4	maker-tulip_contig_305_pilon_pilon-augustus-gene-0.1-mRNA-1	exigua_EL1	exigua_egg	1075.04	0	537.522	12.4263	1.2359	10.0545	8.77848e-24	5.43592e-23
6	maker-tulip_contig_776_pilon_pilon-augustus-gene-0.51-mRNA-1	exigua_EL1	exigua_egg	865.063	0	432.531	12.113	1.20531	10.0497	9.21724e-24	5.69863e-23
1	maker-tulip_contig_216_pilon_pilon-augustus-gene-0.82-mRNA-1	exigua_EL1	exigua_egg	100.092	530.136	315.114	-2.40545	0.2395	-10.0436	9.80004e-24	6.0526e-23
1	augustus_masked-tulip_contig_340_pilon_pilon-processed-gene-0.70-mRNA-1	exigua_EL1	exigua_egg	308.308	1.54257	154.925	7.76081	0.772901	10.0411	1.00506e-23	6.20082e-23
1	maker-tulip_contig_199_pilon_pilon-augustus-gene-5.20-mRNA-1	exigua_EL1	exigua_egg	267.516	1.43784	134.477	7.56375	0.754293	10.0276	1.15276e-23	7.10465e-23
1	maker-tulip_contig_78_pilon_pilon-augustus-gene-0.99-mRNA-1	exigua_EL1	exigua_egg	787.486	179.078	483.282	2.13965	0.213615	10.0164	1.29115e-23	7.9493e-23
1	augustus_masked-tulip_contig_281_pilon_pilon-processed-gene-3.51-mRNA-1	exigua_EL1	exigua_egg	185.945	2.59477	94.2701	6.22372	0.622053	10.0051	1.44709e-23	8.90471e-23
1	maker-tulip_contig_523_pilon_pilon-augustus-gene-0.118-mRNA-1	exigua_EL1	exigua_egg	56.7938	428.463	242.628	-2.91558	0.291499	-10.002	1.49289e-23	9.18173e-23
4	maker-tulip_contig_698_pilon_pilon-augustus-gene-4.12-mRNA-1	exigua_EL1	exigua_egg	753.516	0	376.758	11.9137	1.19128	10.0007	1.51249e-23	9.29685e-23
-	maker-tulip_contig_479_pilon_pilon-augustus-gene-1.30-mRNA-1	exigua_EL1	exigua_egg	307.992	50.4159	179.204	2.61335	0.261316	10.0007	1.51318e-23	9.29685e-23
1	maker-tulip_contig_333_pilon_pilon-augustus-gene-3.127-mRNA-1	exigua_EL1	exigua_egg	17.6149	258.347	137.981	-3.87396	0.387563	-9.9957	1.59158e-23	9.7683e-23
3	maker-tulip_contig_192_pilon_pilon-augustus-gene-1.61-mRNA-1	exigua_EL1	exigua_egg	438.066	1.02315	219.545	8.6934	0.86972	9.99563	1.59271e-23	9.77016e-23
3	maker-tulip_contig_420_pilon_pilon-augustus-gene-2.95-mRNA-1	exigua_EL1	exigua_egg	1467.96	0.385642	734.173	11.914	1.19206	9.9944	1.61255e-23	9.88674e-23
1	augustus_masked-tulip_contig_711_pilon_pilon-processed-gene-0.21-mRNA-1	exigua_EL1	exigua_egg	62.3315	323.304	192.818	-2.37528	0.237673	-9.99391	1.62057e-23	9.92559e-23
1	maker-tulip_contig_759_pilon_pilon-augustus-gene-1.140-mRNA-1	exigua_EL1	exigua_egg	272.274	1.38548	136.83	7.59177	0.759825	9.99148	1.66086e-23	1.01671e-22
1	augustus_masked-tulip_contig_345_pilon_pilon-processed-gene-4.14-mRNA-1	exigua_EL1	exigua_egg	186.421	2.43769	94.4295	6.23886	0.624673	9.9874	1.73069e-23	1.0589e-22
6	maker-tulip_contig_2_pilon_pilon-augustus-gene-5.72-mRNA-1	exigua_EL1	exigua_egg	799.525	0	399.762	11.9993	1.20152	9.98675	1.74197e-23	1.06525e-22
1	maker-tulip_contig_407_pilon_pilon-augustus-gene-5.64-mRNA-1	exigua_EL1	exigua_egg	893.413	0	446.706	12.1595	1.21774	9.9853	1.76757e-23	1.08034e-22
5	maker-tulip_contig_333_pilon_pilon-augustus-gene-2.58-mRNA-1	exigua_EL1	exigua_egg	239.085	21.9162	130.5	3.43732	0.344412	9.98027	1.85958e-23	1.1354e-22
5	maker-tulip_contig_827_pilon_pilon-augustus-gene-2.98-mRNA-1	exigua_EL1	exigua_egg	218.184	2.35627	110.27	6.47413	0.648808	9.97849	1.89318e-23	1.15532e-22
1	maker-tulip_contig_468_pilon_pilon-augustus-gene-3.101-mRNA-1	exigua_EL1	exigua_egg	268.883	59.2543	164.069	2.18488	0.218962	9.97832	1.89642e-23	1.1567e-22
3	maker-tulip_contig_236_pilon_pilon-augustus-gene-7.81-mRNA-1	exigua_EL1	exigua_egg	1067.26	153.038	610.149	2.8052	0.28122	9.9751	1.95909e-23	1.19369e-22
1	maker-tulip_contig_623_pilon_pilon-augustus-gene-5.101-mRNA-1	exigua_EL1	exigua_egg	897.284	0	448.642	12.1657	1.2197	9.97435	1.97386e-23	1.20145e-22
3	maker-tulip_contig_812_pilon_pilon-augustus-gene-2.23-mRNA-1	exigua_EL1	exigua_egg	739.893	0	369.946	11.8875	1.19212	9.97168	2.02779e-23	1.23363e-22
1	augustus_masked-tulip_contig_454_pilon_pilon-processed-gene-2.2-mRNA-1	exigua_EL1	exigua_egg	106.841	499.261	303.051	-2.22547	0.223207	-9.97043	2.05345e-23	1.2486e-22
5	maker-tulip_contig_514_pilon_pilon-augustus-gene-1.24-mRNA-1	exigua_EL1	exigua_egg	1008.22	0	504.111	12.3338	1.23713	9.96969	2.06864e-23	1.25718e-22
1	augustus_masked-tulip_contig_689_pilon_pilon-processed-gene-1.6-mRNA-1	exigua_EL1	exigua_egg	80.1374	660.387	370.262	-3.04154	0.305216	-9.96522	2.16383e-23	1.31436e-22
1	maker-tulip_contig_237_pilon_pilon-augustus-gene-0.27-mRNA-1	exigua_EL1	exigua_egg	448.69	91.0228	269.856	2.30376	0.231287	9.9606	2.26702e-23	1.37633e-22
1	augustus_masked-tulip_contig_323_pilon_pilon-processed-gene-5.10-mRNA-1	exigua_EL1	exigua_egg	235.315	1063.17	649.244	-2.1751	0.218507	-9.95439	2.41307e-23	1.46424e-22
6	maker-tulip_contig_345_pilon_pilon-augustus-gene-0.20-mRNA-1	exigua_EL1	exigua_egg	763.994	0	381.997	11.9337	1.19894	9.95354	2.43369e-23	1.47599e-22
3	maker-tulip_contig_854_pilon_pilon-augustus-gene-1.20-mRNA-1	exigua_EL1	exigua_egg	406.836	1.10456	203.97	8.58249	0.862642	9.94907	2.54552e-23	1.54302e-22
1	maker-tulip_contig_515_pilon_pilon-augustus-gene-6.8-mRNA-1	exigua_EL1	exigua_egg	172.783	6.34833	89.5656	4.76452	0.478907	9.94874	2.55391e-23	1.54732e-22
5	augustus_masked-tulip_contig_407_pilon_pilon-processed-gene-3.76-mRNA-1	exigua_EL1	exigua_egg	430.959	47.1917	239.075	3.19876	0.321624	9.94565	2.63449e-23	1.59531e-22
1	maker-tulip_contig_59_pilon_pilon-augustus-gene-1.97-mRNA-1	exigua_EL1	exigua_egg	174.161	2.49005	88.3257	6.13694	0.617076	9.94519	2.64673e-23	1.60108e-22
5	maker-tulip_contig_603_pilon_pilon-augustus-gene-2.24-mRNA-1	exigua_EL1	exigua_egg	427.524	63.5919	245.558	2.74262	0.275801	9.94419	2.67352e-23	1.61646e-22
3	augustus_masked-tulip_contig_387_pilon_pilon-processed-gene-1.22-mRNA-1	exigua_EL1	exigua_egg	741.54	0	370.77	11.8907	1.19606	9.94155	2.74527e-23	1.65899e-22
1	augustus_masked-tulip_contig_632_pilon_pilon-processed-gene-3.18-mRNA-1	exigua_EL1	exigua_egg	952.339	0.771283	476.555	10.3934	1.04582	9.93803	2.84407e-23	1.71781e-22
-	augustus_masked-tulip_contig_362_pilon_pilon-processed-gene-6.27-mRNA-1	exigua_EL1	exigua_egg	921.508	0	460.754	12.2042	1.22813	9.93716	2.86888e-23	1.73191e-22
1	maker-tulip_contig_236_pilon_pilon-augustus-gene-4.38-mRNA-1	exigua_EL1	exigua_egg	28.6784	212.254	120.466	-2.88824	0.290756	-9.93355	2.97486e-23	1.79497e-22
1	maker-tulip_contig_441_pilon_pilon-augustus-gene-1.184-mRNA-1	exigua_EL1	exigua_egg	727.496	0	363.748	11.863	1.19428	9.93317	2.98616e-23	1.80087e-22
1	maker-tulip_contig_837_pilon_pilon-augustus-gene-7.30-mRNA-1	exigua_EL1	exigua_egg	713.73	0	356.865	11.8354	1.19181	9.93063	3.06329e-23	1.84643e-22
6	maker-tulip_contig_125_pilon_pilon-augustus-gene-0.88-mRNA-1	exigua_EL1	exigua_egg	1120.75	0.689866	560.719	10.633	1.07094	9.92862	3.12541e-23	1.88195e-22
5	augustus_masked-tulip_contig_70_pilon_pilon-processed-gene-0.58-mRNA-1	exigua_EL1	exigua_egg	665.952	99.1699	382.561	2.74631	0.276713	9.92478	3.24833e-23	1.95497e-22
1	maker-tulip_contig_1_pilon_pilon-augustus-gene-4.4-mRNA-1	exigua_EL1	exigua_egg	808.608	0	404.304	12.0156	1.2108	9.92366	3.28495e-23	1.976e-22
6	maker-tulip_contig_334_pilon_pilon-augustus-gene-3.16-mRNA-1	exigua_EL1	exigua_egg	703.148	0	351.574	11.8139	1.19051	9.9234	3.29334e-23	1.98003e-22
1	augustus_masked-tulip_contig_362_pilon_pilon-processed-gene-3.9-mRNA-1	exigua_EL1	exigua_egg	57.0986	288.086	172.592	-2.3371	0.235516	-9.92335	3.29522e-23	1.98016e-22
5	maker-tulip_contig_632_pilon_pilon-augustus-gene-0.10-mRNA-1	exigua_EL1	exigua_egg	153.442	10.4757	81.959	3.86125	0.389218	9.92054	3.38904e-23	2.0355e-22
3	maker-tulip_contig_519_pilon_pilon-augustus-gene-2.33-mRNA-1	exigua_EL1	exigua_egg	285.455	1.38548	143.42	7.66001	0.772285	9.91863	3.45466e-23	2.07385e-22
5	maker-tulip_contig_767_pilon_pilon-augustus-gene-0.78-mRNA-1	exigua_EL1	exigua_egg	169.776	26.0653	97.9209	2.70108	0.272396	9.916	3.54673e-23	2.12804e-22
-	maker-tulip_contig_2_pilon_pilon-augustus-gene-5.44-mRNA-1	exigua_EL1	exigua_egg	758.989	0	379.495	11.924	1.20271	9.91432	3.60692e-23	2.16305e-22
1	maker-tulip_contig_767_pilon_pilon-augustus-gene-0.58-mRNA-1	exigua_EL1	exigua_egg	31.6508	217.161	124.406	-2.77692	0.280276	-9.9078	3.85019e-23	2.30659e-22
1	maker-tulip_contig_523_pilon_pilon-augustus-gene-0.129-mRNA-1	exigua_EL1	exigua_egg	16.7642	188.465	102.614	-3.49031	0.352337	-9.90617	3.9137e-23	2.34344e-22
3	maker-tulip_contig_870_pilon_pilon-augustus-gene-4.73-mRNA-1	exigua_EL1	exigua_egg	161.269	2.99206	82.1308	5.82327	0.588113	9.90162	4.096e-23	2.45011e-22
-	maker-tulip_contig_143_pilon_pilon-augustus-gene-2.21-mRNA-1	exigua_EL1	exigua_egg	222.629	2.16842	112.399	6.71077	0.677781	9.9011	4.11732e-23	2.46162e-22
3	augustus_masked-tulip_contig_274_pilon_pilon-processed-gene-1.30-mRNA-1	exigua_EL1	exigua_egg	150.756	10.5164	80.6364	3.83404	0.387249	9.90071	4.13329e-23	2.46991e-22
1	maker-tulip_contig_701_pilon_pilon-augustus-gene-0.25-mRNA-1	exigua_EL1	exigua_egg	62.9062	305.21	184.058	-2.27726	0.230051	-9.89896	4.20633e-23	2.51228e-22
5	maker-tulip_contig_584_pilon_pilon-augustus-gene-3.7-mRNA-1	exigua_EL1	exigua_egg	672.745	42.8766	357.811	3.96333	0.400468	9.89676	4.29998e-23	2.56692e-22
1	maker-tulip_contig_80_pilon_pilon-augustus-gene-0.51-mRNA-1	exigua_EL1	exigua_egg	53.614	262.573	158.093	-2.2925	0.231739	-9.89256	4.48403e-23	2.67408e-22
5	maker-tulip_contig_270_pilon_pilon-augustus-gene-1.7-mRNA-1	exigua_EL1	exigua_egg	258.164	1.54257	129.853	7.50707	0.758937	9.89156	4.52911e-23	2.6996e-22
5	maker-tulip_contig_773_pilon_pilon-augustus-gene-1.44-mRNA-1	exigua_EL1	exigua_egg	980.277	218.74	599.508	2.16233	0.218702	9.8871	4.73552e-23	2.81978e-22
5	maker-tulip_contig_362_pilon_pilon-augustus-gene-0.51-mRNA-1	exigua_EL1	exigua_egg	575.943	113.055	344.499	2.34683	0.237367	9.88692	4.74421e-23	2.82352e-22
6	maker-tulip_contig_465_pilon_pilon-augustus-gene-0.80-mRNA-1	exigua_EL1	exigua_egg	768.963	0	384.482	11.9428	1.20797	9.8867	4.75464e-23	2.8283e-22
5	maker-tulip_contig_706_pilon_pilon-augustus-gene-0.71-mRNA-1	exigua_EL1	exigua_egg	709.138	0	354.569	11.826	1.19624	9.88596	4.78948e-23	2.84759e-22
1	maker-tulip_contig_95_pilon_pilon-augustus-gene-0.39-mRNA-1	exigua_EL1	exigua_egg	185.959	15.549	100.754	3.58037	0.362491	9.87712	5.2317e-23	3.10738e-22
1	maker-tulip_contig_218_pilon_pilon-augustus-gene-1.122-mRNA-1	exigua_EL1	exigua_egg	55.5768	274.309	164.943	-2.30271	0.233182	-9.87515	5.33504e-23	3.16716e-22
1	augustus_masked-tulip_contig_15_pilon_pilon-processed-gene-0.15-mRNA-1	exigua_EL1	exigua_egg	1364.89	0.333281	682.611	11.809	1.19641	9.87041	5.59379e-23	3.31576e-22
3	maker-tulip_contig_640_pilon_pilon-augustus-gene-2.1-mRNA-1	exigua_EL1	exigua_egg	679.136	0	339.568	11.7638	1.19231	9.86634	5.8252e-23	3.45119e-22
8	augustus_masked-tulip_contig_491_pilon_pilon-processed-gene-0.0-mRNA-1	exigua_EL1	exigua_egg	0.615623	853.977	427.296	-10.4541	1.05994	-9.8629	6.02819e-23	3.56966e-22
5	maker-tulip_contig_807_pilon_pilon-augustus-gene-2.38-mRNA-1	exigua_EL1	exigua_egg	832.718	0.771283	416.745	10.2012	1.0348	9.85807	6.32557e-23	3.74387e-22
1	maker-tulip_contig_507_pilon_pilon-augustus-gene-0.41-mRNA-1	exigua_EL1	exigua_egg	136.29	3.49579	69.8929	5.272	0.535092	9.8525	6.68589e-23	3.95316e-22
1	maker-tulip_contig_694_pilon_pilon-augustus-gene-0.9-mRNA-1	exigua_EL1	exigua_egg	371.886	47.4372	209.662	2.96813	0.30128	9.85175	6.73619e-23	3.9809e-22
8	augustus_masked-tulip_contig_362_pilon_pilon-processed-gene-7.3-mRNA-1	exigua_EL1	exigua_egg	0	619.7	309.85	-11.8485	1.20401	-9.84084	7.50803e-23	4.4326e-22
5	maker-tulip_contig_56_pilon_pilon-augustus-gene-0.0-mRNA-1	exigua_EL1	exigua_egg	166.605	20.0737	93.3393	3.05025	0.310195	9.83334	8.0888e-23	4.77069e-22
1	maker-tulip_contig_194_pilon_pilon-augustus-gene-1.24-mRNA-1	exigua_EL1	exigua_egg	196.469	11.433	103.951	4.11247	0.41903	9.81426	9.77526e-23	5.74808e-22
1	maker-tulip_contig_121_pilon_pilon-augustus-gene-4.20-mRNA-1	exigua_EL1	exigua_egg	6.04754	157.742	81.8947	-4.69775	0.478886	-9.80974	1.02229e-22	6.00532e-22
1	maker-tulip_contig_34_pilon_pilon-augustus-gene-0.126-mRNA-1	exigua_EL1	exigua_egg	713.217	0	356.609	11.8345	1.20703	9.8046	1.07573e-22	6.31294e-22
1	maker-tulip_contig_482_pilon_pilon-augustus-gene-4.16-mRNA-1	exigua_EL1	exigua_egg	4.53621	186.309	95.4224	-5.35526	0.546493	-9.79932	1.13348e-22	6.64192e-22
3	augustus_masked-tulip_contig_212_pilon_pilon-processed-gene-0.14-mRNA-1	exigua_EL1	exigua_egg	145.473	4.03852	74.7557	5.21557	0.532277	9.7986	1.14151e-22	6.68568e-22
5	maker-tulip_contig_54_pilon_pilon-augustus-gene-2.29-mRNA-1	exigua_EL1	exigua_egg	176.514	2.44934	89.4817	6.15983	0.628656	9.79842	1.1436e-22	6.69457e-22
12	maker-tulip_contig_175_pilon_pilon-augustus-gene-4.59-mRNA-1	exigua_EL1	exigua_egg	12.7213	254.699	133.71	-4.31952	0.440894	-9.79717	1.15779e-22	6.77427e-22
1	maker-tulip_contig_228_pilon_pilon-augustus-gene-1.31-mRNA-1	exigua_EL1	exigua_egg	175.739	10.2298	92.9843	4.10115	0.418768	9.79337	1.20219e-22	7.02708e-22
1	augustus_masked-tulip_contig_566_pilon_pilon-processed-gene-2.43-mRNA-1	exigua_EL1	exigua_egg	178.184	15.1575	96.671	3.5534	0.363245	9.78238	1.34019e-22	7.82597e-22
3	maker-tulip_contig_192_pilon_pilon-augustus-gene-1.185-mRNA-1	exigua_EL1	exigua_egg	702.108	0	351.054	11.8119	1.20763	9.78102	1.3583e-22	7.92777e-22
1	maker-tulip_contig_669_pilon_pilon-augustus-gene-0.10-mRNA-1	exigua_EL1	exigua_egg	151.775	11.4989	81.6369	3.7095	0.379398	9.77735	1.40848e-22	8.21254e-22
5	maker-tulip_contig_279_pilon_pilon-augustus-gene-3.4-mRNA-1	exigua_EL1	exigua_egg	187.213	28.2687	107.741	2.72727	0.279039	9.77381	1.45858e-22	8.50044e-22
-	augustus_masked-tulip_contig_523_pilon_pilon-processed-gene-0.47-mRNA-1	exigua_EL1	exigua_egg	338.855	47.6392	193.247	2.8331	0.289885	9.77318	1.46774e-22	8.54959e-22
5	maker-tulip_contig_829_pilon_pilon-augustus-gene-1.17-mRNA-1	exigua_EL1	exigua_egg	921.737	0	460.868	12.2044	1.24922	9.76956	1.52108e-22	8.85154e-22
6	maker-tulip_contig_16_pilon_pilon-augustus-gene-1.2-mRNA-1	exigua_EL1	exigua_egg	696.283	0	348.141	11.7996	1.20826	9.76579	1.57878e-22	9.18282e-22
5	augustus_masked-tulip_contig_519_pilon_pilon-processed-gene-2.16-mRNA-1	exigua_EL1	exigua_egg	672.264	110.457	391.36	2.60777	0.267101	9.76324	1.619e-22	9.40281e-22
3	maker-tulip_contig_307_pilon_pilon-augustus-gene-1.89-mRNA-1	exigua_EL1	exigua_egg	818.357	0.771283	409.564	10.1749	1.04231	9.76192	1.64026e-22	9.52157e-22
5	maker-tulip_contig_661_pilon_pilon-augustus-gene-1.44-mRNA-1	exigua_EL1	exigua_egg	300.276	41.7049	170.99	2.83961	0.290906	9.76124	1.65127e-22	9.58079e-22
1	maker-tulip_contig_855_pilon_pilon-augustus-gene-3.23-mRNA-1	exigua_EL1	exigua_egg	57.6268	274.583	166.105	-2.25379	0.231076	-9.75347	1.78268e-22	1.03382e-21
1	maker-tulip_contig_506_pilon_pilon-augustus-gene-0.17-mRNA-1	exigua_EL1	exigua_egg	415.836	14.3846	215.111	4.86215	0.498554	9.75251	1.79961e-22	1.04312e-21
1	augustus_masked-tulip_contig_401_pilon_pilon-processed-gene-0.9-mRNA-1	exigua_EL1	exigua_egg	186.36	17.128	101.744	3.43572	0.352316	9.75183	1.81166e-22	1.04958e-21
3	maker-tulip_contig_527_pilon_pilon-augustus-gene-0.38-mRNA-1	exigua_EL1	exigua_egg	612.085	0	306.042	11.6138	1.19095	9.75169	1.81423e-22	1.05056e-21
-	maker-tulip_contig_673_pilon_pilon-augustus-gene-0.98-mRNA-1	exigua_EL1	exigua_egg	237.459	12.2643	124.861	4.26926	0.438062	9.74578	1.92288e-22	1.11238e-21
5	maker-tulip_contig_586_pilon_pilon-augustus-gene-6.2-mRNA-1	exigua_EL1	exigua_egg	170.169	18.2891	94.2289	3.23016	0.331483	9.74457	1.94598e-22	1.12464e-21
5	augustus_masked-tulip_contig_564_pilon_pilon-processed-gene-0.7-mRNA-1	exigua_EL1	exigua_egg	270.282	21.8588	146.071	3.64609	0.37421	9.74343	1.96791e-22	1.13676e-21
-	maker-tulip_contig_759_pilon_pilon-augustus-gene-1.105-mRNA-1	exigua_EL1	exigua_egg	76.8818	564.859	320.87	-2.8785	0.295444	-9.74295	1.9772e-22	1.14156e-21
3	maker-tulip_contig_272_pilon_pilon-augustus-gene-4.36-mRNA-1	exigua_EL1	exigua_egg	141.002	4.65847	72.8301	4.93625	0.50712	9.73388	2.16182e-22	1.24632e-21
3	maker-tulip_contig_177_pilon_pilon-augustus-gene-0.11-mRNA-1	exigua_EL1	exigua_egg	204.968	5.90442	105.436	5.10222	0.524211	9.73314	2.17771e-22	1.25487e-21
-	augustus_masked-tulip_contig_515_pilon_pilon-processed-gene-1.5-mRNA-1	exigua_EL1	exigua_egg	793.079	0	396.54	11.9876	1.2317	9.73262	2.18883e-22	1.26067e-21
5	augustus_masked-tulip_contig_159_pilon_pilon-processed-gene-0.14-mRNA-1	exigua_EL1	exigua_egg	659.042	0	329.521	11.7203	1.20429	9.7321	2.19993e-22	1.26644e-21
6	maker-tulip_contig_34_pilon_pilon-augustus-gene-0.29-mRNA-1	exigua_EL1	exigua_egg	776.904	0	388.452	11.9579	1.2288	9.73135	2.21635e-22	1.27527e-21
5	augustus_masked-tulip_contig_195_pilon_pilon-processed-gene-0.9-mRNA-1	exigua_EL1	exigua_egg	414.376	97.7953	256.086	2.08274	0.214054	9.72995	2.24706e-22	1.2923e-21
1	augustus_masked-tulip_contig_829_pilon_pilon-processed-gene-0.24-mRNA-1	exigua_EL1	exigua_egg	1174.37	0.385642	587.377	11.592	1.19153	9.72868	2.27517e-22	1.3072e-21
1	maker-tulip_contig_58_pilon_pilon-augustus-gene-0.49-mRNA-1	exigua_EL1	exigua_egg	193.281	5.41981	99.3502	5.1163	0.52607	9.72551	2.34715e-22	1.34724e-21
1	augustus_masked-tulip_contig_55_pilon_pilon-processed-gene-0.12-mRNA-1	exigua_EL1	exigua_egg	37.9695	224.066	131.018	-2.56039	0.26351	-9.71648	2.56493e-22	1.47153e-21
1	maker-tulip_contig_454_pilon_pilon-augustus-gene-1.10-mRNA-1	exigua_EL1	exigua_egg	38.7044	263.458	151.081	-2.76905	0.285038	-9.71465	2.61132e-22	1.49741e-21
1	maker-tulip_contig_288_pilon_pilon-augustus-gene-1.23-mRNA-1	exigua_EL1	exigua_egg	1580.03	120.834	850.434	3.70829	0.381732	9.71438	2.61828e-22	1.50067e-21
5	augustus_masked-tulip_contig_620_pilon_pilon-processed-gene-0.20-mRNA-1	exigua_EL1	exigua_egg	142.577	2.86994	72.7237	5.65417	0.582444	9.70767	2.79664e-22	1.60212e-21
1	maker-tulip_contig_320_pilon_pilon-augustus-gene-0.20-mRNA-1	exigua_EL1	exigua_egg	1165.13	212.123	688.625	2.45731	0.253171	9.70613	2.83923e-22	1.62573e-21
1	augustus_masked-tulip_contig_809_pilon_pilon-processed-gene-2.0-mRNA-1	exigua_EL1	exigua_egg	721.795	0	360.897	11.8516	1.22125	9.70449	2.88502e-22	1.65114e-21
1	augustus_masked-tulip_contig_145_pilon_pilon-processed-gene-2.12-mRNA-1	exigua_EL1	exigua_egg	297.227	70.6253	183.926	2.0731	0.213641	9.70369	2.90775e-22	1.66335e-21
5	maker-tulip_contig_674_pilon_pilon-augustus-gene-7.26-mRNA-1	exigua_EL1	exigua_egg	214.98	17.917	116.449	3.58052	0.369019	9.70283	2.93264e-22	1.67677e-21
1	maker-tulip_contig_531_pilon_pilon-augustus-gene-4.25-mRNA-1	exigua_EL1	exigua_egg	344.004	1.0522	172.528	8.34299	0.859954	9.70167	2.96605e-22	1.69505e-21
1	augustus_masked-tulip_contig_222_pilon_pilon-processed-gene-0.1-mRNA-1	exigua_EL1	exigua_egg	28.6424	220.407	124.525	-2.94359	0.303458	-9.70016	3.0102e-22	1.71861e-21
3	maker-tulip_contig_535_pilon_pilon-augustus-gene-0.1-mRNA-1	exigua_EL1	exigua_egg	593.289	0	296.645	11.5689	1.19305	9.6969	3.10795e-22	1.77356e-21
5	maker-tulip_contig_907_pilon_pilon-augustus-gene-1.17-mRNA-1	exigua_EL1	exigua_egg	596.383	0	298.192	11.5762	1.19467	9.68989	3.32903e-22	1.89789e-21
1	maker-tulip_contig_827_pilon_pilon-augustus-gene-2.104-mRNA-1	exigua_EL1	exigua_egg	203.218	25.397	114.307	3.00889	0.310834	9.68005	3.6653e-22	2.08758e-21
1	maker-tulip_contig_284_pilon_pilon-augustus-gene-1.33-mRNA-1	exigua_EL1	exigua_egg	734.65	59.5783	397.114	3.61809	0.373922	9.67608	3.81059e-22	2.16823e-21
1	maker-tulip_contig_603_pilon_pilon-augustus-gene-3.77-mRNA-1	exigua_EL1	exigua_egg	772.847	0.689866	386.768	10.096	1.04345	9.67563	3.82736e-22	2.17672e-21
3	maker-tulip_contig_390_pilon_pilon-augustus-gene-0.0-mRNA-1	exigua_EL1	exigua_egg	146.096	5.31928	75.7077	4.78319	0.494473	9.67331	3.91524e-22	2.22455e-21
1	augustus_masked-tulip_contig_327_pilon_pilon-processed-gene-10.23-mRNA-1	exigua_EL1	exigua_egg	576.455	0	288.227	11.5273	1.19172	9.67286	3.93251e-22	2.23329e-21
1	maker-tulip_contig_648_pilon_pilon-augustus-gene-1.16-mRNA-1	exigua_EL1	exigua_egg	74.6929	358.59	216.641	-2.26146	0.233865	-9.66994	4.04611e-22	2.29669e-21
1	maker-tulip_contig_474_pilon_pilon-augustus-gene-1.13-mRNA-1	exigua_EL1	exigua_egg	79.1292	430.548	254.838	-2.44441	0.252806	-9.6691	4.07967e-22	2.31463e-21
1	maker-tulip_contig_211_pilon_pilon-augustus-gene-4.45-mRNA-1	exigua_EL1	exigua_egg	168.287	2.55406	85.4204	6.08239	0.629073	9.66882	4.09065e-22	2.31863e-21
6	maker-tulip_contig_334_pilon_pilon-augustus-gene-3.33-mRNA-1	exigua_EL1	exigua_egg	594.683	0	297.341	11.5721	1.19708	9.66694	4.16643e-22	2.36044e-21
1	augustus_masked-tulip_contig_916_pilon_pilon-processed-gene-3.13-mRNA-1	exigua_EL1	exigua_egg	16.9881	154.801	85.8948	-3.18437	0.329423	-9.66654	4.18296e-22	2.36867e-21
11	maker-tulip_contig_58_pilon_pilon-augustus-gene-2.0-mRNA-1	exigua_EL1	exigua_egg	202.718	1263.91	733.315	-2.64029	0.273235	-9.66309	4.326e-22	2.44732e-21
1	augustus_masked-tulip_contig_168_pilon_pilon-processed-gene-1.38-mRNA-1	exigua_EL1	exigua_egg	393.618	67.6919	230.655	2.54541	0.263493	9.66025	4.44784e-22	2.51504e-21
1	maker-tulip_contig_252_pilon_pilon-augustus-gene-0.9-mRNA-1	exigua_EL1	exigua_egg	1138.38	0.385642	569.383	11.5473	1.19589	9.65578	4.64602e-22	2.62583e-21
1	maker-tulip_contig_323_pilon_pilon-augustus-gene-6.26-mRNA-1	exigua_EL1	exigua_egg	152.205	2.47264	77.3389	5.94397	0.615803	9.6524	4.80168e-22	2.71251e-21
5	augustus_masked-tulip_contig_545_pilon_pilon-processed-gene-0.2-mRNA-1	exigua_EL1	exigua_egg	307.595	48.2839	177.94	2.67025	0.276701	9.65031	4.90063e-22	2.76709e-21
5	maker-tulip_contig_107_pilon_pilon-augustus-gene-0.2-mRNA-1	exigua_EL1	exigua_egg	222.237	28.9743	125.606	2.94733	0.305513	9.64715	5.0543e-22	2.85112e-21
5	maker-tulip_contig_407_pilon_pilon-augustus-gene-2.36-mRNA-1	exigua_EL1	exigua_egg	737.04	0.689866	368.865	10.0275	1.04035	9.63851	5.49807e-22	3.097e-21
1	maker-tulip_contig_778_pilon_pilon-augustus-gene-1.5-mRNA-1	exigua_EL1	exigua_egg	211.3	924.525	567.912	-2.12888	0.220964	-9.63451	5.71662e-22	3.21857e-21
5	maker-tulip_contig_56_pilon_pilon-augustus-gene-0.36-mRNA-1	exigua_EL1	exigua_egg	569.805	0	284.902	11.5104	1.19508	9.63149	5.88717e-22	3.31143e-21
1	maker-tulip_contig_331_pilon_pilon-augustus-gene-0.26-mRNA-1	exigua_EL1	exigua_egg	174.334	2.05795	88.1958	6.36624	0.661156	9.62895	6.0343e-22	3.39257e-21
1	maker-tulip_contig_307_pilon_pilon-augustus-gene-0.0-mRNA-1	exigua_EL1	exigua_egg	338.062	8.41777	173.24	5.32282	0.552804	9.62877	6.04475e-22	3.39682e-21
1	maker-tulip_contig_555_pilon_pilon-augustus-gene-2.53-mRNA-1	exigua_EL1	exigua_egg	1077.7	0.385642	539.041	11.4682	1.19112	9.62812	6.0831e-22	3.41674e-21
1	augustus_masked-tulip_contig_482_pilon_pilon-processed-gene-2.33-mRNA-1	exigua_EL1	exigua_egg	189.895	1.87585	95.8853	6.74171	0.700357	9.6261	6.20407e-22	3.48303e-21
5	maker-tulip_contig_360_pilon_pilon-augustus-gene-2.34-mRNA-1	exigua_EL1	exigua_egg	180.981	24.9764	102.979	2.86465	0.2977	9.6226	6.4187e-22	3.60181e-21
1	maker-tulip_contig_839_pilon_pilon-augustus-gene-1.32-mRNA-1	exigua_EL1	exigua_egg	602.396	0	301.198	11.5909	1.20456	9.6225	6.42513e-22	3.6037e-21
8	maker-tulip_contig_339_pilon_pilon-augustus-gene-3.21-mRNA-1	exigua_EL1	exigua_egg	7.31124	500.245	253.778	-6.09626	0.634154	-9.61322	7.03158e-22	3.94197e-21
1	augustus_masked-tulip_contig_704_pilon_pilon-processed-gene-2.110-mRNA-1	exigua_EL1	exigua_egg	603.397	0	301.698	11.5933	1.20628	9.61075	7.20239e-22	4.0358e-21
3	maker-tulip_contig_80_pilon_pilon-augustus-gene-0.101-mRNA-1	exigua_EL1	exigua_egg	1073.39	0.385642	536.887	11.4624	1.19284	9.6093	7.30416e-22	4.08894e-21
1	maker-tulip_contig_228_pilon_pilon-augustus-gene-1.54-mRNA-1	exigua_EL1	exigua_egg	9.39148	163.7	86.5456	-4.12126	0.428892	-9.60909	7.31939e-22	4.09552e-21
1	maker-tulip_contig_56_pilon_pilon-augustus-gene-0.13-mRNA-1	exigua_EL1	exigua_egg	365.676	69.4255	217.551	2.39812	0.249663	9.60544	7.58346e-22	4.24127e-21
1	maker-tulip_contig_829_pilon_pilon-augustus-gene-3.4-mRNA-1	exigua_EL1	exigua_egg	94.1076	633.081	363.594	-2.7488	0.286234	-9.60333	7.74059e-22	4.32657e-21
1	maker-tulip_contig_693_pilon_pilon-augustus-gene-2.43-mRNA-1	exigua_EL1	exigua_egg	143.088	3.31369	73.2008	5.48244	0.570892	9.60329	7.74332e-22	4.32657e-21
1	maker-tulip_contig_667_pilon_pilon-augustus-gene-0.64-mRNA-1	exigua_EL1	exigua_egg	148.658	6.38903	77.5233	4.54487	0.473274	9.60305	7.76129e-22	4.33455e-21
1	augustus_masked-tulip_contig_860_pilon_pilon-processed-gene-6.30-mRNA-1	exigua_EL1	exigua_egg	211.638	1.77113	106.705	6.90474	0.719167	9.60102	7.91558e-22	4.41862e-21
3	maker-tulip_contig_407_pilon_pilon-augustus-gene-0.72-mRNA-1	exigua_EL1	exigua_egg	703.795	0.730575	352.263	9.95952	1.03739	9.60055	7.95193e-22	4.43543e-21
1	augustus_masked-tulip_contig_362_pilon_pilon-processed-gene-6.25-mRNA-1	exigua_EL1	exigua_egg	172.291	10.4582	91.3745	4.03141	0.419915	9.60053	7.95322e-22	4.43543e-21
12	augustus_masked-tulip_contig_753_pilon_pilon-processed-gene-1.31-mRNA-1	exigua_EL1	exigua_egg	0	612.733	306.366	-11.8323	1.23323	-9.59454	8.42923e-22	4.69868e-21
5	augustus_masked-tulip_contig_198_pilon_pilon-processed-gene-5.21-mRNA-1	exigua_EL1	exigua_egg	184.02	1.87585	92.948	6.69627	0.69849	9.58679	9.0872e-22	5.06305e-21
3	maker-tulip_contig_525_pilon_pilon-augustus-gene-2.32-mRNA-1	exigua_EL1	exigua_egg	286.793	1.6664	144.23	7.35683	0.767436	9.58626	9.13396e-22	5.0867e-21
3	augustus_masked-tulip_contig_745_pilon_pilon-processed-gene-3.64-mRNA-1	exigua_EL1	exigua_egg	561.616	0	280.808	11.4895	1.19882	9.58405	9.33086e-22	5.1939e-21
5	maker-tulip_contig_211_pilon_pilon-augustus-gene-2.53-mRNA-1	exigua_EL1	exigua_egg	199.034	8.3578	103.696	4.59738	0.479767	9.58253	9.46941e-22	5.26853e-21
1	maker-tulip_contig_745_pilon_pilon-augustus-gene-3.6-mRNA-1	exigua_EL1	exigua_egg	645.782	0	322.891	11.691	1.22062	9.57793	9.90105e-22	5.50608e-21
5	maker-tulip_contig_145_pilon_pilon-augustus-gene-2.44-mRNA-1	exigua_EL1	exigua_egg	147.677	18.8452	83.2612	2.97583	0.310821	9.57411	1.02737e-21	5.71065e-21
1	augustus_masked-tulip_contig_450_pilon_pilon-processed-gene-1.10-mRNA-1	exigua_EL1	exigua_egg	240.095	14.5043	127.299	4.03379	0.421333	9.5739	1.02951e-21	5.7198e-21
5	augustus_masked-tulip_contig_161_pilon_pilon-processed-gene-0.3-mRNA-1	exigua_EL1	exigua_egg	130.901	7.08465	68.9929	4.21001	0.439761	9.57341	1.0344e-21	5.74429e-21
1	maker-tulip_contig_531_pilon_pilon-augustus-gene-4.28-mRNA-1	exigua_EL1	exigua_egg	205.205	10.9468	108.076	4.25298	0.444727	9.56313	1.14243e-21	6.33821e-21
-	augustus_masked-tulip_contig_697_pilon_pilon-processed-gene-1.30-mRNA-1	exigua_EL1	exigua_egg	3.94188	111.592	57.7672	-4.81782	0.503928	-9.56053	1.17161e-21	6.49704e-21
3	maker-tulip_contig_55_pilon_pilon-augustus-gene-0.95-mRNA-1	exigua_EL1	exigua_egg	282.519	45.8445	164.182	2.62683	0.274974	9.55302	1.25972e-21	6.97912e-21
1	augustus_masked-tulip_contig_611_pilon_pilon-processed-gene-3.10-mRNA-1	exigua_EL1	exigua_egg	1031.36	0.385642	515.875	11.4048	1.1939	9.55256	1.26536e-21	7.00705e-21
-	maker-tulip_contig_199_pilon_pilon-augustus-gene-4.137-mRNA-1	exigua_EL1	exigua_egg	553.936	0	276.968	11.4699	1.20116	9.54898	1.30978e-21	7.24961e-21
3	maker-tulip_contig_827_pilon_pilon-augustus-gene-2.67-mRNA-1	exigua_EL1	exigua_egg	537.676	0	268.838	11.4269	1.19707	9.54578	1.3509e-21	7.47371e-21
-	maker-tulip_contig_316_pilon_pilon-augustus-gene-2.10-mRNA-1	exigua_EL1	exigua_egg	995.682	0.333281	498.008	11.354	1.18944	9.54569	1.35202e-21	7.47641e-21
1	maker-tulip_contig_272_pilon_pilon-augustus-gene-1.0-mRNA-1	exigua_EL1	exigua_egg	11.8741	140.641	76.2573	-3.56466	0.373736	-9.53792	1.4573e-21	8.0435e-21
1	maker-tulip_contig_318_pilon_pilon-augustus-gene-3.9-mRNA-1	exigua_EL1	exigua_egg	907.394	211.945	559.669	2.09568	0.219842	9.53267	1.53291e-21	8.45291e-21
3	maker-tulip_contig_274_pilon_pilon-augustus-gene-1.15-mRNA-1	exigua_EL1	exigua_egg	147.876	3.84072	75.8584	5.25335	0.551553	9.52466	1.65582e-21	9.11545e-21
1	maker-tulip_contig_583_pilon_pilon-augustus-gene-2.38-mRNA-1	exigua_EL1	exigua_egg	14.0228	125.554	69.7885	-3.16362	0.332152	-9.52464	1.65616e-21	9.11545e-21
1	maker-tulip_contig_228_pilon_pilon-augustus-gene-1.55-mRNA-1	exigua_EL1	exigua_egg	265.823	1.39714	133.61	7.55733	0.793527	9.52371	1.67097e-21	9.19268e-21
1	maker-tulip_contig_702_pilon_pilon-augustus-gene-0.48-mRNA-1	exigua_EL1	exigua_egg	522.33	0	261.165	11.3852	1.19553	9.52308	1.68122e-21	9.24475e-21
6	maker-tulip_contig_191_pilon_pilon-augustus-gene-0.58-mRNA-1	exigua_EL1	exigua_egg	689.516	0.678214	345.097	9.932	1.04305	9.52212	1.69689e-21	9.32655e-21
1	augustus_masked-tulip_contig_491_pilon_pilon-processed-gene-1.88-mRNA-1	exigua_EL1	exigua_egg	29.8352	192.461	111.148	-2.68943	0.282652	-9.51497	1.81769e-21	9.98121e-21
5	maker-tulip_contig_145_pilon_pilon-augustus-gene-3.1-mRNA-1	exigua_EL1	exigua_egg	7959.69	0.385642	3980.04	14.3529	1.5085	9.51467	1.82293e-21	1.00053e-20
5	maker-tulip_contig_407_pilon_pilon-augustus-gene-8.91-mRNA-1	exigua_EL1	exigua_egg	177.144	1.73042	89.4371	6.65053	0.699062	9.5135	1.84345e-21	1.01132e-20
1	maker-tulip_contig_284_pilon_pilon-augustus-gene-0.0-mRNA-1	exigua_EL1	exigua_egg	960.219	0.385642	480.302	11.3016	1.18949	9.50122	2.07453e-21	1.13598e-20
5	augustus_masked-tulip_contig_272_pilon_pilon-processed-gene-4.78-mRNA-1	exigua_EL1	exigua_egg	450.101	83.513	266.807	2.42615	0.255452	9.49748	2.15023e-21	1.17689e-20
1	maker-tulip_contig_916_pilon_pilon-augustus-gene-1.16-mRNA-1	exigua_EL1	exigua_egg	633.617	0	316.808	11.6638	1.22906	9.48996	2.31119e-21	1.26263e-20
5	maker-tulip_contig_881_pilon_pilon-augustus-gene-1.43-mRNA-1	exigua_EL1	exigua_egg	607.826	0	303.913	11.6036	1.22285	9.48899	2.3328e-21	1.27385e-20
1	maker-tulip_contig_504_pilon_pilon-augustus-gene-3.7-mRNA-1	exigua_EL1	exigua_egg	498.846	0	249.423	11.3187	1.19288	9.48859	2.34185e-21	1.27807e-20
5	maker-tulip_contig_732_pilon_pilon-augustus-gene-4.96-mRNA-1	exigua_EL1	exigua_egg	278.14	53.625	165.882	2.37757	0.250573	9.48855	2.3427e-21	1.27807e-20
5	maker-tulip_contig_318_pilon_pilon-augustus-gene-3.2-mRNA-1	exigua_EL1	exigua_egg	132.141	7.94481	70.0428	4.03362	0.425116	9.48828	2.34887e-21	1.28085e-20
1	maker-tulip_contig_58_pilon_pilon-augustus-gene-4.47-mRNA-1	exigua_EL1	exigua_egg	314.333	52.2489	183.291	2.5852	0.272695	9.48019	2.53809e-21	1.38339e-20
1	maker-tulip_contig_515_pilon_pilon-augustus-gene-1.34-mRNA-1	exigua_EL1	exigua_egg	505.579	0	252.79	11.3381	1.19607	9.47945	2.55635e-21	1.3927e-20
1	maker-tulip_contig_42_pilon_pilon-augustus-gene-1.23-mRNA-1	exigua_EL1	exigua_egg	23.064	190.46	106.762	-3.04261	0.321043	-9.47725	2.61082e-21	1.42171e-20
4	maker-tulip_contig_280_pilon_pilon-augustus-gene-1.31-mRNA-1	exigua_EL1	exigua_egg	668.247	0.718922	334.483	9.88499	1.04314	9.47618	2.6376e-21	1.43563e-20
1	maker-tulip_contig_271_pilon_pilon-augustus-gene-2.53-mRNA-1	exigua_EL1	exigua_egg	338.33	1.15692	169.744	8.31208	0.877318	9.47442	2.68239e-21	1.45934e-20
1	augustus_masked-tulip_contig_677_pilon_pilon-processed-gene-0.26-mRNA-1	exigua_EL1	exigua_egg	498.016	0	249.008	11.3163	1.19468	9.4722	2.74023e-21	1.49012e-20
1	augustus_masked-tulip_contig_329_pilon_pilon-processed-gene-0.39-mRNA-1	exigua_EL1	exigua_egg	36.4518	233.128	134.79	-2.67516	0.282581	-9.46686	2.8837e-21	1.56741e-20
-	maker-tulip_contig_560_pilon_pilon-augustus-gene-2.21-mRNA-1	exigua_EL1	exigua_egg	88.5131	453.254	270.883	-2.35532	0.248885	-9.46347	2.97904e-21	1.617e-20
1	maker-tulip_contig_812_pilon_pilon-augustus-gene-0.19-mRNA-1	exigua_EL1	exigua_egg	819.839	164.046	491.943	2.32172	0.245392	9.46126	3.04266e-21	1.65077e-20
1	maker-tulip_contig_272_pilon_pilon-augustus-gene-4.28-mRNA-1	exigua_EL1	exigua_egg	130.527	5.80964	68.1684	4.51874	0.477642	9.46051	3.06434e-21	1.66176e-20
5	maker-tulip_contig_110_pilon_pilon-augustus-gene-2.71-mRNA-1	exigua_EL1	exigua_egg	332.723	24.2149	178.469	3.79143	0.400816	9.45927	3.1009e-21	1.68082e-20
1	maker-tulip_contig_640_pilon_pilon-augustus-gene-2.8-mRNA-1	exigua_EL1	exigua_egg	733.955	0.689866	367.322	10.0218	1.05984	9.45601	3.19917e-21	1.73249e-20
1	maker-tulip_contig_133_pilon_pilon-augustus-gene-1.26-mRNA-1	exigua_EL1	exigua_egg	503.086	0	251.543	11.331	1.1984	9.45514	3.22601e-21	1.74623e-20
1	augustus_masked-tulip_contig_654_pilon_pilon-processed-gene-0.0-mRNA-1	exigua_EL1	exigua_egg	229.524	3.67028	116.597	6.00457	0.635327	9.45114	3.35146e-21	1.8133e-20
3	maker-tulip_contig_378_pilon_pilon-augustus-gene-1.0-mRNA-1	exigua_EL1	exigua_egg	617.415	0	308.708	11.6264	1.23029	9.45011	3.38489e-21	1.83054e-20
1	maker-tulip_contig_707_pilon_pilon-augustus-gene-0.71-mRNA-1	exigua_EL1	exigua_egg	191.635	3.51319	97.574	5.76387	0.61027	9.44479	3.56103e-21	1.92492e-20
6	augustus_masked-tulip_contig_337_pilon_pilon-processed-gene-0.19-mRNA-1	exigua_EL1	exigua_egg	554.706	0	277.353	11.4719	1.21519	9.44044	3.71228e-21	2.00575e-20
1	augustus_masked-tulip_contig_317_pilon_pilon-processed-gene-1.78-mRNA-1	exigua_EL1	exigua_egg	12.1931	139.582	75.8878	-3.51779	0.372814	-9.43579	3.8807e-21	2.09579e-20
1	maker-tulip_contig_555_pilon_pilon-augustus-gene-2.70-mRNA-1	exigua_EL1	exigua_egg	321.931	31.9529	176.942	3.34556	0.354849	9.42811	4.17545e-21	2.25394e-20
1	augustus_masked-tulip_contig_190_pilon_pilon-processed-gene-2.36-mRNA-1	exigua_EL1	exigua_egg	36.2981	205.737	121.018	-2.50308	0.26577	-9.41821	4.58862e-21	2.47584e-20
1	augustus_masked-tulip_contig_815_pilon_pilon-processed-gene-1.51-mRNA-1	exigua_EL1	exigua_egg	50.6465	305.214	177.93	-2.58878	0.274915	-9.41665	4.657e-21	2.51159e-20
1	augustus_masked-tulip_contig_702_pilon_pilon-processed-gene-0.3-mRNA-1	exigua_EL1	exigua_egg	45.2548	227.547	136.401	-2.32795	0.247238	-9.41583	4.69338e-21	2.52889e-20
1	maker-tulip_contig_819_pilon_pilon-augustus-gene-1.6-mRNA-1	exigua_EL1	exigua_egg	40.7108	224.363	132.537	-2.4627	0.261591	-9.41433	4.76124e-21	2.56428e-20
4	maker-tulip_contig_491_pilon_pilon-augustus-gene-1.67-mRNA-1	exigua_EL1	exigua_egg	643.385	0.666561	322.026	9.83252	1.04513	9.40795	5.05901e-21	2.71968e-20
1	maker-tulip_contig_192_pilon_pilon-augustus-gene-1.171-mRNA-1	exigua_EL1	exigua_egg	222.935	1045.72	634.328	-2.2292	0.237021	-9.40508	5.19916e-21	2.79375e-20
-	maker-tulip_contig_407_pilon_pilon-augustus-gene-8.50-mRNA-1	exigua_EL1	exigua_egg	466.828	0	233.414	11.223	1.19351	9.40338	5.28355e-21	2.8378e-20
1	maker-tulip_contig_800_pilon_pilon-augustus-gene-1.67-mRNA-1	exigua_EL1	exigua_egg	3151.97	635.979	1893.98	2.30839	0.245557	9.40063	5.42352e-21	2.91165e-20
1	maker-tulip_contig_69_pilon_pilon-augustus-gene-0.24-mRNA-1	exigua_EL1	exigua_egg	290.096	1.10456	145.6	8.09488	0.861618	9.39498	5.72292e-21	3.0668e-20
1	augustus_masked-tulip_contig_244_pilon_pilon-processed-gene-0.25-mRNA-1	exigua_EL1	exigua_egg	240.932	6.79364	123.863	5.11807	0.544843	9.39365	5.7955e-21	3.10428e-20
5	maker-tulip_contig_33_pilon_pilon-augustus-gene-1.28-mRNA-1	exigua_EL1	exigua_egg	173.365	25.3523	99.3586	2.77088	0.294987	9.39326	5.81729e-21	3.11454e-20
3	maker-tulip_contig_837_pilon_pilon-augustus-gene-6.16-mRNA-1	exigua_EL1	exigua_egg	465.047	0	232.523	11.2174	1.19428	9.39264	5.8516e-21	3.13148e-20
1	augustus_masked-tulip_contig_47_pilon_pilon-processed-gene-0.18-mRNA-1	exigua_EL1	exigua_egg	60.2288	258.292	159.26	-2.10096	0.223771	-9.38887	6.06478e-21	3.24115e-20
1	maker-tulip_contig_732_pilon_pilon-augustus-gene-0.0-mRNA-1	exigua_EL1	exigua_egg	4.54153	119.517	62.0291	-4.71097	0.501821	-9.38775	6.12943e-21	3.27421e-20
3	maker-tulip_contig_394_pilon_pilon-augustus-gene-4.20-mRNA-1	exigua_EL1	exigua_egg	172.041	4.81555	88.4281	5.20597	0.554795	9.38358	6.37673e-21	3.40169e-20
1	maker-tulip_contig_610_pilon_pilon-augustus-gene-0.33-mRNA-1	exigua_EL1	exigua_egg	303.638	1.15692	152.397	8.15713	0.869499	9.38141	6.50942e-21	3.47091e-20
11	augustus_masked-tulip_contig_306_pilon_pilon-processed-gene-0.9-mRNA-1	exigua_EL1	exigua_egg	0	416.179	208.09	-11.2752	1.20213	-9.37936	6.63763e-21	3.53607e-20
1	maker-tulip_contig_132_pilon_pilon-augustus-gene-1.70-mRNA-1	exigua_EL1	exigua_egg	31.3087	180.811	106.06	-2.53035	0.269826	-9.37772	6.74158e-21	3.58983e-20
1	maker-tulip_contig_839_pilon_pilon-augustus-gene-1.48-mRNA-1	exigua_EL1	exigua_egg	529.641	0	264.821	11.4052	1.21624	9.3774	6.76172e-21	3.59892e-20
1	augustus_masked-tulip_contig_290_pilon_pilon-processed-gene-0.48-mRNA-1	exigua_EL1	exigua_egg	87.995	426.294	257.144	-2.27603	0.242726	-9.37693	6.79198e-21	3.61339e-20
5	maker-tulip_contig_234_pilon_pilon-augustus-gene-1.20-mRNA-1	exigua_EL1	exigua_egg	125.53	3.80002	64.6651	5.01933	0.53529	9.37684	6.79785e-21	3.61489e-20
5	maker-tulip_contig_2_pilon_pilon-augustus-gene-8.24-mRNA-1	exigua_EL1	exigua_egg	169.973	2.22078	86.0967	6.31644	0.673683	9.37598	6.85345e-21	3.64281e-20
3	augustus_masked-tulip_contig_773_pilon_pilon-processed-gene-0.4-mRNA-1	exigua_EL1	exigua_egg	298.218	1.0522	149.635	8.13719	0.868128	9.37326	7.0324e-21	3.73624e-20
3	maker-tulip_contig_800_pilon_pilon-augustus-gene-1.51-mRNA-1	exigua_EL1	exigua_egg	467.378	0	233.689	11.2248	1.19824	9.36769	7.41381e-21	3.93711e-20
6	augustus_masked-tulip_contig_666_pilon_pilon-processed-gene-2.64-mRNA-1	exigua_EL1	exigua_egg	488.549	0	244.274	11.2887	1.20551	9.3643	7.65586e-21	4.06381e-20
1	maker-tulip_contig_916_pilon_pilon-augustus-gene-2.8-mRNA-1	exigua_EL1	exigua_egg	455.708	0	227.854	11.1881	1.19543	9.35901	8.04845e-21	4.26644e-20
3	maker-tulip_contig_111_pilon_pilon-augustus-gene-0.30-mRNA-1	exigua_EL1	exigua_egg	514.644	101.958	308.301	2.33863	0.249896	9.35843	8.09274e-21	4.28799e-20
6	maker-tulip_contig_125_pilon_pilon-augustus-gene-0.87-mRNA-1	exigua_EL1	exigua_egg	586.211	0	293.105	11.5516	1.23458	9.35674	8.22328e-21	4.3552e-20
1	augustus_masked-tulip_contig_20_pilon_pilon-processed-gene-0.7-mRNA-1	exigua_EL1	exigua_egg	185.818	29.2901	107.554	2.67343	0.28597	9.34864	8.8784e-21	4.69583e-20
6	maker-tulip_contig_479_pilon_pilon-augustus-gene-3.27-mRNA-1	exigua_EL1	exigua_egg	2644.24	0	1322.12	13.7248	1.46813	9.3485	8.89026e-21	4.69999e-20
3	maker-tulip_contig_341_pilon_pilon-augustus-gene-0.4-mRNA-1	exigua_EL1	exigua_egg	299.024	1.0522	150.038	8.14067	0.870825	9.34822	8.91317e-21	4.70999e-20
5	maker-tulip_contig_270_pilon_pilon-augustus-gene-3.87-mRNA-1	exigua_EL1	exigua_egg	301.588	29.0821	165.335	3.3707	0.361022	9.33655	9.95282e-21	5.24996e-20
1	maker-tulip_contig_125_pilon_pilon-augustus-gene-0.94-mRNA-1	exigua_EL1	exigua_egg	442.22	0	221.11	11.1449	1.19398	9.33421	1.01747e-20	5.36458e-20
1	augustus_masked-tulip_contig_711_pilon_pilon-processed-gene-2.24-mRNA-1	exigua_EL1	exigua_egg	29.8204	311.818	170.819	-3.38522	0.362701	-9.33338	1.02551e-20	5.40457e-20
1	maker-tulip_contig_515_pilon_pilon-augustus-gene-7.27-mRNA-1	exigua_EL1	exigua_egg	158.901	3.60626	81.2537	5.4845	0.587648	9.33297	1.02944e-20	5.42284e-20
1	augustus_masked-tulip_contig_217_pilon_pilon-processed-gene-3.56-mRNA-1	exigua_EL1	exigua_egg	15.5424	135.368	75.4553	-3.12521	0.334927	-9.33102	1.04858e-20	5.52121e-20
1	maker-tulip_contig_327_pilon_pilon-augustus-gene-0.10-mRNA-1	exigua_EL1	exigua_egg	412.892	2842.8	1627.85	-2.78384	0.298391	-9.3295	1.06369e-20	5.59827e-20
6	maker-tulip_contig_321_pilon_pilon-augustus-gene-1.39-mRNA-1	exigua_EL1	exigua_egg	9009.17	6.00743	4507.59	10.566	1.13358	9.3209	1.15356e-20	6.06315e-20
1	maker-tulip_contig_523_pilon_pilon-augustus-gene-0.110-mRNA-1	exigua_EL1	exigua_egg	362.668	75.5432	219.106	2.26083	0.242558	9.3208	1.15467e-20	6.06625e-20
5	maker-tulip_contig_130_pilon_pilon-augustus-gene-0.24-mRNA-1	exigua_EL1	exigua_egg	173.672	18.6592	96.1654	3.21575	0.345283	9.31338	1.23831e-20	6.49411e-20
-	maker-tulip_contig_585_pilon_pilon-augustus-gene-0.12-mRNA-1	exigua_EL1	exigua_egg	5.17192	134.064	69.6182	-4.69436	0.504483	-9.30529	1.3363e-20	7.00177e-20
1	maker-tulip_contig_837_pilon_pilon-augustus-gene-5.4-mRNA-1	exigua_EL1	exigua_egg	125.281	3.20322	64.2423	5.2987	0.56964	9.30184	1.3803e-20	7.22908e-20
3	maker-tulip_contig_78_pilon_pilon-augustus-gene-0.36-mRNA-1	exigua_EL1	exigua_egg	388.176	53.7785	220.977	2.85984	0.307548	9.29883	1.42003e-20	7.43385e-20
1	maker-tulip_contig_211_pilon_pilon-augustus-gene-2.31-mRNA-1	exigua_EL1	exigua_egg	22.7326	232.727	127.73	-3.35233	0.360531	-9.29832	1.4268e-20	7.46598e-20
5	augustus_masked-tulip_contig_424_pilon_pilon-processed-gene-0.101-mRNA-1	exigua_EL1	exigua_egg	635.135	0.689866	317.912	9.813	1.05556	9.29652	1.45113e-20	7.58993e-20
-	augustus_masked-tulip_contig_327_pilon_pilon-processed-gene-10.10-mRNA-1	exigua_EL1	exigua_egg	128.723	10.7026	69.7127	3.59711	0.387271	9.28837	1.56667e-20	8.17609e-20
9	maker-tulip_contig_610_pilon_pilon-augustus-gene-2.11-mRNA-1	exigua_EL1	exigua_egg	383.19	76.5977	229.894	2.32392	0.250249	9.28644	1.59531e-20	8.3219e-20
3	augustus_masked-tulip_contig_147_pilon_pilon-processed-gene-1.80-mRNA-1	exigua_EL1	exigua_egg	585.075	0.771283	292.923	9.69076	1.04391	9.28312	1.64585e-20	8.58172e-20
1	maker-tulip_contig_504_pilon_pilon-augustus-gene-2.9-mRNA-1	exigua_EL1	exigua_egg	27.8885	219.82	123.854	-2.97525	0.32056	-9.28139	1.67276e-20	8.71819e-20
5	augustus_masked-tulip_contig_236_pilon_pilon-processed-gene-4.0-mRNA-1	exigua_EL1	exigua_egg	210.014	48.7046	129.359	2.10775	0.227218	9.27632	1.75439e-20	9.13553e-20
1	maker-tulip_contig_648_pilon_pilon-augustus-gene-1.15-mRNA-1	exigua_EL1	exigua_egg	114.181	6.34242	60.2618	4.16729	0.449308	9.27491	1.77777e-20	9.25183e-20
12	maker-tulip_contig_807_pilon_pilon-augustus-gene-3.57-mRNA-1	exigua_EL1	exigua_egg	1.23125	214.891	108.061	-7.4606	0.804388	-9.27487	1.77829e-20	9.25183e-20
4	augustus_masked-tulip_contig_559_pilon_pilon-processed-gene-3.29-mRNA-1	exigua_EL1	exigua_egg	487.475	0	243.737	11.2855	1.2169	9.274	1.79292e-20	9.32383e-20
1	maker-tulip_contig_482_pilon_pilon-augustus-gene-2.10-mRNA-1	exigua_EL1	exigua_egg	333.592	37.2252	185.409	3.16082	0.340937	9.27097	1.84455e-20	9.58807e-20
1	maker-tulip_contig_525_pilon_pilon-augustus-gene-2.34-mRNA-1	exigua_EL1	exigua_egg	425.569	0	212.784	11.0896	1.19621	9.27056	1.85166e-20	9.61653e-20
1	maker-tulip_contig_598_pilon_pilon-augustus-gene-0.44-mRNA-1	exigua_EL1	exigua_egg	52.9926	228.115	140.554	-2.10535	0.227184	-9.26716	1.91161e-20	9.91917e-20
1	augustus_masked-tulip_contig_566_pilon_pilon-processed-gene-2.33-mRNA-1	exigua_EL1	exigua_egg	173.836	29.4913	101.664	2.55462	0.275792	9.26287	1.99012e-20	1.03175e-19
5	maker-tulip_contig_320_pilon_pilon-augustus-gene-1.4-mRNA-1	exigua_EL1	exigua_egg	162.618	5.19544	83.9067	5.01591	0.541568	9.26182	2.00974e-20	1.041e-19
1	maker-tulip_contig_121_pilon_pilon-augustus-gene-1.12-mRNA-1	exigua_EL1	exigua_egg	128.269	2.51335	65.391	5.69414	0.615192	9.25586	2.12507e-20	1.09881e-19
5	maker-tulip_contig_667_pilon_pilon-augustus-gene-0.87-mRNA-1	exigua_EL1	exigua_egg	257.454	26.4433	141.949	3.28943	0.355511	9.25268	2.18933e-20	1.13154e-19
4	maker-tulip_contig_479_pilon_pilon-augustus-gene-2.5-mRNA-1	exigua_EL1	exigua_egg	419.561	0	209.781	11.069	1.19647	9.25136	2.21664e-20	1.14515e-19
1	maker-tulip_contig_640_pilon_pilon-augustus-gene-1.35-mRNA-1	exigua_EL1	exigua_egg	38.7221	195.36	117.041	-2.33565	0.252515	-9.24955	2.25436e-20	1.16311e-19
1	maker-tulip_contig_112_pilon_pilon-augustus-gene-2.5-mRNA-1	exigua_EL1	exigua_egg	429.666	0	214.833	11.1034	1.20125	9.24321	2.39219e-20	1.23368e-19
1	augustus_masked-tulip_contig_230_pilon_pilon-processed-gene-0.22-mRNA-1	exigua_EL1	exigua_egg	98.948	462.986	280.967	-2.2262	0.240898	-9.24125	2.43631e-20	1.25588e-19
6	maker-tulip_contig_339_pilon_pilon-augustus-gene-0.91-mRNA-1	exigua_EL1	exigua_egg	678.628	0.689866	339.659	9.90925	1.07258	9.2387	2.49499e-20	1.285e-19
1	maker-tulip_contig_491_pilon_pilon-augustus-gene-1.8-mRNA-1	exigua_EL1	exigua_egg	121.797	631.556	376.676	-2.37465	0.25714	-9.23488	2.58579e-20	1.33119e-19
5	maker-tulip_contig_196_pilon_pilon-augustus-gene-5.52-mRNA-1	exigua_EL1	exigua_egg	421.055	0	210.527	11.0739	1.19939	9.23298	2.63215e-20	1.35447e-19
-	maker-tulip_contig_490_pilon_pilon-augustus-gene-0.11-mRNA-1	exigua_EL1	exigua_egg	195.024	1.49021	98.257	7.10405	0.769548	9.23145	2.66987e-20	1.37268e-19
5	maker-tulip_contig_323_pilon_pilon-augustus-gene-5.5-mRNA-1	exigua_EL1	exigua_egg	151.056	16.7234	83.8897	3.18115	0.344631	9.2306	2.69116e-20	1.38302e-19
1	augustus_masked-tulip_contig_907_pilon_pilon-processed-gene-2.39-mRNA-1	exigua_EL1	exigua_egg	49.3438	257.505	153.425	-2.38343	0.258268	-9.22852	2.74407e-20	1.4096e-19
3	maker-tulip_contig_270_pilon_pilon-augustus-gene-0.25-mRNA-1	exigua_EL1	exigua_egg	781.306	0.344933	390.825	11.0042	1.19253	9.22764	2.76651e-20	1.4205e-19
12	maker-tulip_contig_843_pilon_pilon-augustus-gene-8.20-mRNA-1	exigua_EL1	exigua_egg	1.52901	184.314	92.9215	-6.91781	0.749761	-9.22669	2.79132e-20	1.43199e-19
-	maker-tulip_contig_4_pilon_pilon-augustus-gene-0.0-mRNA-1	exigua_EL1	exigua_egg	130.416	3.07519	66.7456	5.36647	0.581723	9.22513	2.83219e-20	1.4517e-19
5	maker-tulip_contig_260_pilon_pilon-augustus-gene-0.10-mRNA-1	exigua_EL1	exigua_egg	238.717	43.8856	141.301	2.44928	0.265582	9.22233	2.90721e-20	1.48886e-19
12	maker-tulip_contig_394_pilon_pilon-augustus-gene-4.51-mRNA-1	exigua_EL1	exigua_egg	0	393.378	196.689	-11.1927	1.21369	-9.22202	2.91558e-20	1.49249e-19
4	augustus_masked-tulip_contig_175_pilon_pilon-processed-gene-4.4-mRNA-1	exigua_EL1	exigua_egg	433.732	0	216.866	11.1169	1.20598	9.2182	3.02133e-20	1.54596e-19
1	maker-tulip_contig_640_pilon_pilon-augustus-gene-0.6-mRNA-1	exigua_EL1	exigua_egg	537.336	0.771283	269.053	9.56866	1.03813	9.21721	3.04928e-20	1.55958e-19
5	maker-tulip_contig_843_pilon_pilon-augustus-gene-2.12-mRNA-1	exigua_EL1	exigua_egg	120.322	8.06119	64.1918	3.8918	0.422286	9.21604	3.08283e-20	1.57605e-19
10	augustus_masked-tulip_contig_916_pilon_pilon-processed-gene-2.192-mRNA-1	exigua_EL1	exigua_egg	442.78	0	221.39	11.1468	1.20961	9.2152	3.10686e-20	1.58765e-19
1	maker-tulip_contig_546_pilon_pilon-augustus-gene-0.49-mRNA-1	exigua_EL1	exigua_egg	150.279	11.8029	81.0408	3.65618	0.397236	9.20405	3.44705e-20	1.75997e-19
5	augustus_masked-tulip_contig_76_pilon_pilon-processed-gene-1.27-mRNA-1	exigua_EL1	exigua_egg	206.042	1.49021	103.766	7.18191	0.780643	9.19999	3.57979e-20	1.82616e-19
1	maker-tulip_contig_434_pilon_pilon-augustus-gene-0.5-mRNA-1	exigua_EL1	exigua_egg	163.711	691.952	427.832	-2.08017	0.226113	-9.1997	3.58942e-20	1.82994e-19
4	maker-tulip_contig_666_pilon_pilon-augustus-gene-2.22-mRNA-1	exigua_EL1	exigua_egg	439.647	0	219.823	11.1363	1.21051	9.19968	3.59031e-20	1.82994e-19
4	maker-tulip_contig_3_pilon_pilon-augustus-gene-5.37-mRNA-1	exigua_EL1	exigua_egg	791.276	0.344933	395.81	11.0224	1.1984	9.19759	3.66062e-20	1.86497e-19
1	maker-tulip_contig_654_pilon_pilon-augustus-gene-1.68-mRNA-1	exigua_EL1	exigua_egg	422.238	0	211.119	11.0783	1.20475	9.19549	3.73273e-20	1.89924e-19
4	maker-tulip_contig_773_pilon_pilon-augustus-gene-3.20-mRNA-1	exigua_EL1	exigua_egg	751.272	0.385642	375.829	10.9476	1.19103	9.19174	3.86535e-20	1.96587e-19
1	maker-tulip_contig_39_pilon_pilon-augustus-gene-0.18-mRNA-1	exigua_EL1	exigua_egg	428.499	2269.35	1348.93	-2.40449	0.261597	-9.19159	3.87073e-20	1.96776e-19
6	maker-tulip_contig_339_pilon_pilon-augustus-gene-1.7-mRNA-1	exigua_EL1	exigua_egg	415.321	0	207.66	11.0545	1.20279	9.19071	3.90272e-20	1.98316e-19
1	maker-tulip_contig_628_pilon_pilon-augustus-gene-0.4-mRNA-1	exigua_EL1	exigua_egg	471.184	0	235.592	11.2365	1.22322	9.18601	4.07667e-20	2.06977e-19
3	maker-tulip_contig_738_pilon_pilon-augustus-gene-1.10-mRNA-1	exigua_EL1	exigua_egg	747.905	0.385642	374.145	10.9412	1.19157	9.18216	4.22521e-20	2.14334e-19
1	maker-tulip_contig_807_pilon_pilon-augustus-gene-3.36-mRNA-1	exigua_EL1	exigua_egg	427.451	0	213.725	11.0959	1.21043	9.16694	4.86637e-20	2.46435e-19
1	maker-tulip_contig_252_pilon_pilon-augustus-gene-1.16-mRNA-1	exigua_EL1	exigua_egg	13.9674	146.831	80.3994	-3.39206	0.370143	-9.16419	4.99223e-20	2.52483e-19
-	maker-tulip_contig_121_pilon_pilon-augustus-gene-1.18-mRNA-1	exigua_EL1	exigua_egg	165.519	2.45524	83.9873	6.06621	0.662008	9.16335	5.0312e-20	2.54235e-19
5	maker-tulip_contig_837_pilon_pilon-augustus-gene-9.63-mRNA-1	exigua_EL1	exigua_egg	195.464	40.5853	118.025	2.26744	0.247493	9.16162	5.11241e-20	2.58228e-19
5	augustus_masked-tulip_contig_659_pilon_pilon-processed-gene-0.6-mRNA-1	exigua_EL1	exigua_egg	274.635	40.6277	157.632	2.75231	0.300483	9.15962	5.20827e-20	2.62957e-19
1	augustus_masked-tulip_contig_800_pilon_pilon-processed-gene-0.14-mRNA-1	exigua_EL1	exigua_egg	199.145	1.50186	100.323	7.13237	0.778717	9.15912	5.232e-20	2.64042e-19
5	maker-tulip_contig_465_pilon_pilon-augustus-gene-0.28-mRNA-1	exigua_EL1	exigua_egg	196.048	38.0238	117.036	2.3702	0.258905	9.15472	5.44979e-20	2.74798e-19
1	maker-tulip_contig_525_pilon_pilon-augustus-gene-2.35-mRNA-1	exigua_EL1	exigua_egg	260.957	1.07551	131.016	7.94326	0.868002	9.1512	5.63049e-20	2.83788e-19
1	maker-tulip_contig_916_pilon_pilon-augustus-gene-0.21-mRNA-1	exigua_EL1	exigua_egg	254.686	1.10456	127.895	7.90669	0.864013	9.15112	5.63446e-20	2.83867e-19
1	maker-tulip_contig_586_pilon_pilon-augustus-gene-12.35-mRNA-1	exigua_EL1	exigua_egg	382.484	0	191.242	10.9354	1.19501	9.15085	5.64897e-20	2.84477e-19
1	maker-tulip_contig_560_pilon_pilon-augustus-gene-0.22-mRNA-1	exigua_EL1	exigua_egg	507.52	2597.8	1552.66	-2.35554	0.257452	-9.14946	5.72191e-20	2.88027e-19
1	maker-tulip_contig_837_pilon_pilon-augustus-gene-8.59-mRNA-1	exigua_EL1	exigua_egg	398.97	0	199.485	10.9965	1.20191	9.14917	5.73704e-20	2.88665e-19
3	maker-tulip_contig_39_pilon_pilon-augustus-gene-1.158-mRNA-1	exigua_EL1	exigua_egg	499.18	0	249.59	11.3195	1.23747	9.14731	5.83673e-20	2.9343e-19
12	augustus_masked-tulip_contig_753_pilon_pilon-processed-gene-1.30-mRNA-1	exigua_EL1	exigua_egg	0	452.192	226.096	-11.3938	1.2459	-9.14504	5.96079e-20	2.99412e-19
1	augustus_masked-tulip_contig_698_pilon_pilon-processed-gene-1.8-mRNA-1	exigua_EL1	exigua_egg	124.599	8.68533	66.6422	3.86582	0.422998	9.13911	6.29704e-20	3.16032e-19
5	maker-tulip_contig_640_pilon_pilon-augustus-gene-0.11-mRNA-1	exigua_EL1	exigua_egg	140.222	17.9459	79.0841	2.96291	0.32434	9.1352	6.52857e-20	3.27373e-19
3	augustus_masked-tulip_contig_357_pilon_pilon-processed-gene-1.51-mRNA-1	exigua_EL1	exigua_egg	484.573	0	242.287	11.2769	1.23446	9.13506	6.53699e-20	3.27656e-19
5	augustus_masked-tulip_contig_468_pilon_pilon-processed-gene-1.54-mRNA-1	exigua_EL1	exigua_egg	739.718	0.385642	370.052	10.9253	1.19602	9.13475	6.55598e-20	3.28468e-19
5	maker-tulip_contig_74_pilon_pilon-augustus-gene-0.51-mRNA-1	exigua_EL1	exigua_egg	173.576	21.942	97.7589	2.99676	0.328304	9.12802	6.97645e-20	3.49238e-19
3	maker-tulip_contig_837_pilon_pilon-augustus-gene-7.16-mRNA-1	exigua_EL1	exigua_egg	139.246	5.12724	72.1869	4.7303	0.518589	9.12149	7.40993e-20	3.70779e-19
1	augustus_masked-tulip_contig_715_pilon_pilon-processed-gene-5.18-mRNA-1	exigua_EL1	exigua_egg	1040.83	80.1047	560.466	3.70512	0.406611	9.11221	8.07229e-20	4.03238e-19
1	maker-tulip_contig_313_pilon_pilon-augustus-gene-0.18-mRNA-1	exigua_EL1	exigua_egg	1.54378	172.455	86.9992	-6.82271	0.748761	-9.112	8.08747e-20	4.03825e-19
6	augustus_masked-tulip_contig_626_pilon_pilon-processed-gene-1.18-mRNA-1	exigua_EL1	exigua_egg	371.445	0	185.723	10.8932	1.19575	9.10991	8.24529e-20	4.11531e-19
5	maker-tulip_contig_81_pilon_pilon-augustus-gene-4.12-mRNA-1	exigua_EL1	exigua_egg	741.848	178.785	460.316	2.05562	0.225684	9.10837	8.36322e-20	4.17064e-19
1	maker-tulip_contig_217_pilon_pilon-augustus-gene-3.15-mRNA-1	exigua_EL1	exigua_egg	37.0827	177.175	107.129	-2.25524	0.247627	-9.10743	8.43579e-20	4.20505e-19
1	maker-tulip_contig_698_pilon_pilon-augustus-gene-1.26-mRNA-1	exigua_EL1	exigua_egg	498.302	0.718922	249.51	9.46158	1.03952	9.10183	8.88236e-20	4.42391e-19
3	maker-tulip_contig_131_pilon_pilon-augustus-gene-0.42-mRNA-1	exigua_EL1	exigua_egg	146.995	2.26149	74.6282	6.10431	0.67079	9.10017	9.01911e-20	4.49012e-19
1	maker-tulip_contig_147_pilon_pilon-augustus-gene-0.89-mRNA-1	exigua_EL1	exigua_egg	59.8305	249.05	154.44	-2.0561	0.22609	-9.09415	9.53301e-20	4.74196e-19
-	augustus_masked-tulip_contig_77_pilon_pilon-processed-gene-0.6-mRNA-1	exigua_EL1	exigua_egg	87.4781	384.329	235.904	-2.13469	0.234784	-9.09214	9.71055e-20	4.82824e-19
5	maker-tulip_contig_147_pilon_pilon-augustus-gene-1.33-mRNA-1	exigua_EL1	exigua_egg	124.468	3.65862	64.0633	5.12861	0.564092	9.09181	9.7406e-20	4.84113e-19
5	augustus_masked-tulip_contig_474_pilon_pilon-processed-gene-0.133-mRNA-1	exigua_EL1	exigua_egg	285.849	63.2847	174.567	2.17262	0.238968	9.09168	9.75229e-20	4.8449e-19
1	maker-tulip_contig_837_pilon_pilon-augustus-gene-0.2-mRNA-1	exigua_EL1	exigua_egg	137.485	2.20913	69.8471	6.01301	0.661537	9.08946	9.95359e-20	4.94282e-19
10	maker-tulip_contig_843_pilon_pilon-augustus-gene-8.22-mRNA-1	exigua_EL1	exigua_egg	128.473	12.6673	70.5701	3.33887	0.367611	9.08261	1.06002e-19	5.25727e-19
1	maker-tulip_contig_507_pilon_pilon-augustus-gene-0.65-mRNA-1	exigua_EL1	exigua_egg	41.6378	218.164	129.901	-2.38766	0.26304	-9.0772	1.11407e-19	5.52301e-19
5	maker-tulip_contig_208_pilon_pilon-augustus-gene-0.16-mRNA-1	exigua_EL1	exigua_egg	235.338	4.22046	119.779	5.79751	0.63878	9.07591	1.12728e-19	5.58615e-19
1	maker-tulip_contig_547_pilon_pilon-augustus-gene-6.39-mRNA-1	exigua_EL1	exigua_egg	144.753	3.04442	73.8989	5.65736	0.623698	9.07067	1.18288e-19	5.85922e-19
1	augustus_masked-tulip_contig_82_pilon_pilon-processed-gene-1.3-mRNA-1	exigua_EL1	exigua_egg	330.076	77.4127	203.744	2.09039	0.230618	9.06429	1.25419e-19	6.20723e-19
11	augustus_masked-tulip_contig_145_pilon_pilon-processed-gene-3.31-mRNA-1	exigua_EL1	exigua_egg	0	318.499	159.25	-10.8895	1.2017	-9.06177	1.28355e-19	6.34717e-19
1	augustus_masked-tulip_contig_926_pilon_pilon-processed-gene-0.29-mRNA-1	exigua_EL1	exigua_egg	248.287	1.49021	124.889	7.44747	0.821886	9.06144	1.28737e-19	6.36343e-19
5	maker-tulip_contig_211_pilon_pilon-augustus-gene-0.30-mRNA-1	exigua_EL1	exigua_egg	132.385	2.20913	67.2972	5.95876	0.657724	9.05967	1.30849e-19	6.4624e-19
1	augustus_masked-tulip_contig_345_pilon_pilon-processed-gene-0.11-mRNA-1	exigua_EL1	exigua_egg	46.8671	269.934	158.4	-2.52447	0.278696	-9.05814	1.32689e-19	6.5505e-19
5	maker-tulip_contig_307_pilon_pilon-augustus-gene-1.97-mRNA-1	exigua_EL1	exigua_egg	481.23	73.2654	277.248	2.722	0.300533	9.05724	1.33799e-19	6.60254e-19
1	augustus_masked-tulip_contig_289_pilon_pilon-processed-gene-0.7-mRNA-1	exigua_EL1	exigua_egg	697.818	0.344933	349.082	10.841	1.19713	9.05579	1.35584e-19	6.68781e-19
1	maker-tulip_contig_515_pilon_pilon-augustus-gene-7.16-mRNA-1	exigua_EL1	exigua_egg	328.505	71.1988	199.852	2.2052	0.243528	9.05521	1.36299e-19	6.72029e-19
1	augustus_masked-tulip_contig_465_pilon_pilon-processed-gene-0.104-mRNA-1	exigua_EL1	exigua_egg	181.421	1.36808	91.3946	7.00724	0.773872	9.05478	1.36844e-19	6.74431e-19
3	augustus_masked-tulip_contig_110_pilon_pilon-processed-gene-1.13-mRNA-1	exigua_EL1	exigua_egg	122.35	2.56571	62.4581	5.62221	0.621097	9.05208	1.40276e-19	6.90772e-19
1	maker-tulip_contig_77_pilon_pilon-augustus-gene-0.96-mRNA-1	exigua_EL1	exigua_egg	29.2379	159.332	94.2851	-2.44552	0.270238	-9.0495	1.43628e-19	7.06688e-19
1	maker-tulip_contig_81_pilon_pilon-augustus-gene-1.10-mRNA-1	exigua_EL1	exigua_egg	396.8	0	198.4	10.9886	1.21445	9.04817	1.45383e-19	7.15022e-19
1	maker-tulip_contig_721_pilon_pilon-augustus-gene-1.0-mRNA-1	exigua_EL1	exigua_egg	176.732	1.54257	89.1373	6.95857	0.769703	9.0406	1.55812e-19	7.65038e-19
6	maker-tulip_contig_659_pilon_pilon-augustus-gene-0.26-mRNA-1	exigua_EL1	exigua_egg	408.895	1.15692	205.026	8.57496	0.948564	9.03994	1.56756e-19	7.69349e-19
4	augustus_masked-tulip_contig_616_pilon_pilon-processed-gene-2.2-mRNA-1	exigua_EL1	exigua_egg	359.947	0	179.973	10.848	1.20016	9.03878	1.5843e-19	7.77241e-19
6	maker-tulip_contig_707_pilon_pilon-augustus-gene-0.23-mRNA-1	exigua_EL1	exigua_egg	728.191	0.333281	364.262	10.9027	1.20631	9.03806	1.59473e-19	7.81707e-19
11	augustus_masked-tulip_contig_654_pilon_pilon-processed-gene-1.17-mRNA-1	exigua_EL1	exigua_egg	352.775	1467.56	910.166	-2.05683	0.227681	-9.03381	1.65803e-19	8.124e-19
1	maker-tulip_contig_145_pilon_pilon-augustus-gene-4.61-mRNA-1	exigua_EL1	exigua_egg	109.712	735.141	422.426	-2.74508	0.30406	-9.02809	1.74695e-19	8.5526e-19
1	augustus_masked-tulip_contig_711_pilon_pilon-processed-gene-2.10-mRNA-1	exigua_EL1	exigua_egg	161.899	1.92821	81.9137	6.50443	0.720587	9.02656	1.77153e-19	8.66932e-19
3	maker-tulip_contig_669_pilon_pilon-augustus-gene-2.113-mRNA-1	exigua_EL1	exigua_egg	355.712	0	177.856	10.8309	1.20059	9.02131	1.85849e-19	9.09111e-19
1	maker-tulip_contig_516_pilon_pilon-augustus-gene-3.14-mRNA-1	exigua_EL1	exigua_egg	770.669	0.344933	385.507	10.9844	1.21768	9.02079	1.86742e-19	9.13098e-19
3	maker-tulip_contig_884_pilon_pilon-augustus-gene-0.7-mRNA-1	exigua_EL1	exigua_egg	155.635	10.9969	83.3161	3.80047	0.421496	9.01662	1.93989e-19	9.4814e-19
1	maker-tulip_contig_320_pilon_pilon-augustus-gene-2.11-mRNA-1	exigua_EL1	exigua_egg	836.237	3790.91	2313.57	-2.18077	0.241879	-9.01593	1.95203e-19	9.53678e-19
1	maker-tulip_contig_81_pilon_pilon-augustus-gene-2.14-mRNA-1	exigua_EL1	exigua_egg	346.447	0	173.224	10.7928	1.19839	9.0061	2.13515e-19	1.04228e-18
3	augustus_masked-tulip_contig_927_pilon_pilon-processed-gene-0.53-mRNA-1	exigua_EL1	exigua_egg	389.439	0	194.72	10.9616	1.21723	9.0054	2.14883e-19	1.04852e-18
1	maker-tulip_contig_178_pilon_pilon-augustus-gene-0.52-mRNA-1	exigua_EL1	exigua_egg	117.655	2.88734	60.271	5.3754	0.597017	9.00378	2.18081e-19	1.06369e-18
1	maker-tulip_contig_671_pilon_pilon-augustus-gene-0.41-mRNA-1	exigua_EL1	exigua_egg	353.783	0	176.891	10.8231	1.20219	9.00281	2.20021e-19	1.0727e-18
5	maker-tulip_contig_284_pilon_pilon-augustus-gene-2.24-mRNA-1	exigua_EL1	exigua_egg	182.642	1.54257	92.0921	7.00447	0.778183	9.00105	2.23559e-19	1.0895e-18
1	maker-tulip_contig_429_pilon_pilon-augustus-gene-2.9-mRNA-1	exigua_EL1	exigua_egg	150.137	22.0851	86.1112	2.75888	0.306566	8.99931	2.27131e-19	1.10645e-18
5	augustus_masked-tulip_contig_312_pilon_pilon-processed-gene-0.21-mRNA-1	exigua_EL1	exigua_egg	256.001	37.2441	146.623	2.77363	0.30822	8.99885	2.28102e-19	1.11027e-18
3	maker-tulip_contig_691_pilon_pilon-augustus-gene-1.4-mRNA-1	exigua_EL1	exigua_egg	606.158	65.8841	336.021	3.20613	0.356376	8.9965	2.33027e-19	1.13377e-18
1	maker-tulip_contig_519_pilon_pilon-augustus-gene-0.10-mRNA-1	exigua_EL1	exigua_egg	368.697	0	184.349	10.8826	1.20983	8.99516	2.35889e-19	1.14675e-18
5	augustus_masked-tulip_contig_65_pilon_pilon-processed-gene-0.2-mRNA-1	exigua_EL1	exigua_egg	338.684	0	169.342	10.7599	1.19714	8.988	2.51764e-19	1.22291e-18
5	augustus_masked-tulip_contig_113_pilon_pilon-processed-gene-0.54-mRNA-1	exigua_EL1	exigua_egg	418.798	46.0798	232.439	3.19298	0.355286	8.98708	2.53888e-19	1.23272e-18
3	augustus_masked-tulip_contig_434_pilon_pilon-processed-gene-0.32-mRNA-1	exigua_EL1	exigua_egg	332.989	56.845	194.917	2.54476	0.283205	8.98558	2.57379e-19	1.24916e-18
1	maker-tulip_contig_414_pilon_pilon-augustus-gene-0.18-mRNA-1	exigua_EL1	exigua_egg	176.008	28.9935	102.501	2.60259	0.289653	8.98519	2.58277e-19	1.253e-18
3	augustus_masked-tulip_contig_648_pilon_pilon-processed-gene-2.59-mRNA-1	exigua_EL1	exigua_egg	335.883	0	167.941	10.7479	1.19665	8.98169	2.66648e-19	1.29308e-18
1	maker-tulip_contig_429_pilon_pilon-augustus-gene-0.42-mRNA-1	exigua_EL1	exigua_egg	337.931	0	168.965	10.7569	1.19796	8.97932	2.7244e-19	1.32062e-18
1	augustus_masked-tulip_contig_827_pilon_pilon-processed-gene-1.9-mRNA-1	exigua_EL1	exigua_egg	237.055	1.07551	119.065	7.80459	0.869632	8.9746	2.84394e-19	1.37743e-18
1	maker-tulip_contig_102_pilon_pilon-augustus-gene-0.44-mRNA-1	exigua_EL1	exigua_egg	125.461	4.32519	64.8933	4.88058	0.543825	8.97455	2.84511e-19	1.37743e-18
1	maker-tulip_contig_338_pilon_pilon-augustus-gene-1.12-mRNA-1	exigua_EL1	exigua_egg	148.324	1.8875	75.1055	6.38289	0.7116	8.96977	2.97146e-19	1.43802e-18
6	maker-tulip_contig_653_pilon_pilon-augustus-gene-0.12-mRNA-1	exigua_EL1	exigua_egg	416.932	0	208.466	11.0601	1.2341	8.96204	3.18728e-19	1.54183e-18
5	maker-tulip_contig_586_pilon_pilon-augustus-gene-12.26-mRNA-1	exigua_EL1	exigua_egg	278.799	26.5094	152.654	3.39471	0.379089	8.95491	3.40018e-19	1.64279e-18
1	augustus_masked-tulip_contig_584_pilon_pilon-processed-gene-3.86-mRNA-1	exigua_EL1	exigua_egg	44.1564	207.099	125.628	-2.23127	0.2494	-8.94653	3.66839e-19	1.77092e-18
3	maker-tulip_contig_773_pilon_pilon-augustus-gene-2.54-mRNA-1	exigua_EL1	exigua_egg	716.594	0.385642	358.49	10.8793	1.21608	8.94623	3.67828e-19	1.77498e-18
3	maker-tulip_contig_473_pilon_pilon-augustus-gene-0.16-mRNA-1	exigua_EL1	exigua_egg	335.435	0	167.718	10.7459	1.20121	8.94589	3.68964e-19	1.77973e-18
1	augustus_masked-tulip_contig_424_pilon_pilon-processed-gene-0.91-mRNA-1	exigua_EL1	exigua_egg	138.56	2.15102	70.3557	6.02741	0.674183	8.94032	3.88047e-19	1.86948e-18
5	augustus_masked-tulip_contig_716_pilon_pilon-processed-gene-0.0-mRNA-1	exigua_EL1	exigua_egg	470.453	117.044	293.748	2.0074	0.224571	8.9388	3.93418e-19	1.89458e-18
5	augustus_masked-tulip_contig_584_pilon_pilon-processed-gene-0.16-mRNA-1	exigua_EL1	exigua_egg	182.234	15.4866	98.8603	3.53854	0.395865	8.93874	3.93626e-19	1.89481e-18
1	augustus_masked-tulip_contig_842_pilon_pilon-processed-gene-0.94-mRNA-1	exigua_EL1	exigua_egg	128.256	6.0441	67.1501	4.41358	0.493809	8.93783	3.96895e-19	1.90976e-18
1	maker-tulip_contig_110_pilon_pilon-augustus-gene-3.24-mRNA-1	exigua_EL1	exigua_egg	145.136	2.59477	73.8654	5.8625	0.656042	8.93616	4.02946e-19	1.93809e-18
1	maker-tulip_contig_408_pilon_pilon-augustus-gene-0.25-mRNA-1	exigua_EL1	exigua_egg	454.783	0.666561	227.725	9.33227	1.04512	8.92936	4.28486e-19	2.05925e-18
5	maker-tulip_contig_809_pilon_pilon-augustus-gene-3.18-mRNA-1	exigua_EL1	exigua_egg	785.088	108.643	446.865	2.84934	0.319193	8.9267	4.38893e-19	2.1084e-18
1	augustus_masked-tulip_contig_317_pilon_pilon-processed-gene-1.90-mRNA-1	exigua_EL1	exigua_egg	107.025	3.43178	55.2283	4.92837	0.552545	8.9194	4.6881e-19	2.25029e-18
[truncated: 2,975 more rows]

## Sheet: EL1-VS-F
cluster	gene	sampleA	sampleB	baseMeanA	baseMeanB	baseMean	log2FoldChange	lfcSE	stat	pvalue	padj
5	maker-tulip_contig_852_pilon_pilon-augustus-gene-0.19-mRNA-1	exigua_EL1	exigua_F	10154.5	38.5507	5096.55	8.05218	0.206811	38.935	0	0
12	maker-tulip_contig_112_pilon_pilon-augustus-gene-0.35-mRNA-1	exigua_EL1	exigua_F	23.275	14699.5	7361.38	-9.30593	0.222888	-41.7516	0	0
4	maker-tulip_contig_927_pilon_pilon-augustus-gene-0.4-mRNA-1	exigua_EL1	exigua_F	13871.6	47.4698	6959.53	8.11313	0.18339	44.2398	0	0
3	maker-tulip_contig_537_pilon_pilon-augustus-gene-0.43-mRNA-1	exigua_EL1	exigua_F	4709.68	92.0828	2400.88	5.68155	0.153037	37.1254	1.09271e-301	3.29507e-298
1	maker-tulip_contig_531_pilon_pilon-augustus-gene-7.19-mRNA-1	exigua_EL1	exigua_F	3756.77	44.4433	1900.6	6.42105	0.18047	35.5796	2.90024e-277	6.99655e-274
3	maker-tulip_contig_586_pilon_pilon-augustus-gene-1.5-mRNA-1	exigua_EL1	exigua_F	4129.55	87.9943	2108.77	5.53111	0.160272	34.5108	5.5329e-261	1.1123e-257
3	maker-tulip_contig_827_pilon_pilon-augustus-gene-1.14-mRNA-1	exigua_EL1	exigua_F	3260.69	78.1766	1669.43	5.3888	0.156272	34.4836	1.41521e-260	2.43861e-257
5	maker-tulip_contig_39_pilon_pilon-augustus-gene-1.161-mRNA-1	exigua_EL1	exigua_F	20649.5	683.367	10666.4	4.91184	0.143207	34.2988	8.17778e-258	1.233e-254
12	augustus_masked-tulip_contig_307_pilon_pilon-processed-gene-1.9-mRNA-1	exigua_EL1	exigua_F	15.3828	7196.46	3605.92	-8.87141	0.264283	-33.5678	4.95216e-247	6.637e-244
5	augustus_masked-tulip_contig_474_pilon_pilon-processed-gene-3.6-mRNA-1	exigua_EL1	exigua_F	148289	9552.63	78920.7	3.95634	0.11844	33.4039	1.20528e-244	1.45381e-241
6	maker-tulip_contig_368_pilon_pilon-augustus-gene-0.58-mRNA-1	exigua_EL1	exigua_F	5334.07	64.5044	2699.29	6.3912	0.192188	33.2549	1.7338e-242	1.90119e-239
12	maker-tulip_contig_807_pilon_pilon-augustus-gene-3.68-mRNA-1	exigua_EL1	exigua_F	10.8406	8254.29	4132.56	-9.57862	0.288887	-33.1569	4.49776e-241	4.52099e-238
4	augustus_masked-tulip_contig_82_pilon_pilon-processed-gene-1.17-mRNA-1	exigua_EL1	exigua_F	4470.72	44.8407	2257.78	6.73253	0.203878	33.0224	3.87719e-239	3.59744e-236
3	maker-tulip_contig_208_pilon_pilon-augustus-gene-0.10-mRNA-1	exigua_EL1	exigua_F	2781.27	86.3584	1433.81	5.0352	0.15755	31.9594	3.99548e-224	3.44239e-221
4	augustus_masked-tulip_contig_211_pilon_pilon-processed-gene-4.20-mRNA-1	exigua_EL1	exigua_F	3290.46	105.894	1698.18	4.97373	0.156635	31.7537	2.82048e-221	2.26804e-218
1	maker-tulip_contig_829_pilon_pilon-augustus-gene-1.51-mRNA-1	exigua_EL1	exigua_F	4122.75	47.3124	2085.03	6.4689	0.213802	30.2565	4.28952e-201	3.23376e-198
5	maker-tulip_contig_738_pilon_pilon-augustus-gene-1.19-mRNA-1	exigua_EL1	exigua_F	4056.31	127.105	2091.71	5.03704	0.167683	30.0391	3.02731e-198	2.14797e-195
3	maker-tulip_contig_125_pilon_pilon-augustus-gene-0.318-mRNA-1	exigua_EL1	exigua_F	6454.07	307.767	3380.92	4.38012	0.147024	29.792	4.96683e-195	3.32833e-192
12	maker-tulip_contig_781_pilon_pilon-augustus-gene-2.0-mRNA-1	exigua_EL1	exigua_F	322.81	15188.2	7755.5	-5.55537	0.188161	-29.5245	1.39459e-191	8.85347e-189
1	maker-tulip_contig_451_pilon_pilon-augustus-gene-1.45-mRNA-1	exigua_EL1	exigua_F	7693.27	104.322	3898.8	6.16669	0.209584	29.4234	2.75665e-190	1.66254e-187
1	maker-tulip_contig_895_pilon_pilon-augustus-gene-2.26-mRNA-1	exigua_EL1	exigua_F	484.376	7551.85	4018.11	-3.9638	0.135568	-29.2385	6.28654e-188	3.61087e-185
9	augustus_masked-tulip_contig_451_pilon_pilon-processed-gene-0.4-mRNA-1	exigua_EL1	exigua_F	36.2423	2752.23	1394.24	-6.24456	0.213648	-29.2283	8.48406e-188	4.65158e-185
6	maker-tulip_contig_218_pilon_pilon-augustus-gene-0.97-mRNA-1	exigua_EL1	exigua_F	3027.03	11.259	1519.14	8.31404	0.285412	29.13	1.49879e-186	7.8602e-184
3	maker-tulip_contig_927_pilon_pilon-augustus-gene-0.17-mRNA-1	exigua_EL1	exigua_F	2139.49	55.2138	1097.35	5.28103	0.181812	29.0467	1.69552e-185	8.52142e-183
6	augustus_masked-tulip_contig_334_pilon_pilon-processed-gene-4.5-mRNA-1	exigua_EL1	exigua_F	7889.14	3.71875	3946.43	10.5326	0.366688	28.7235	1.93912e-181	9.35588e-179
4	augustus_masked-tulip_contig_82_pilon_pilon-processed-gene-1.16-mRNA-1	exigua_EL1	exigua_F	2490.05	51.9738	1271.01	5.4916	0.192458	28.5341	4.42773e-179	2.05413e-176
3	augustus_masked-tulip_contig_632_pilon_pilon-processed-gene-3.3-mRNA-1	exigua_EL1	exigua_F	2290.41	39.3636	1164.89	5.85194	0.206237	28.3748	4.14054e-177	1.84975e-174
12	augustus_masked-tulip_contig_31_pilon_pilon-processed-gene-1.31-mRNA-1	exigua_EL1	exigua_F	45.6908	1776.25	910.969	-5.27675	0.187146	-28.1959	6.56746e-175	2.82917e-172
5	maker-tulip_contig_31_pilon_pilon-augustus-gene-1.59-mRNA-1	exigua_EL1	exigua_F	1876.62	78.8485	977.733	4.56681	0.16247	28.1087	7.66582e-174	3.18845e-171
5	maker-tulip_contig_773_pilon_pilon-augustus-gene-2.55-mRNA-1	exigua_EL1	exigua_F	15417.5	541.543	7979.53	4.81562	0.171712	28.0448	4.62226e-173	1.85846e-170
3	maker-tulip_contig_287_pilon_pilon-augustus-gene-1.0-mRNA-1	exigua_EL1	exigua_F	4962.96	175.552	2569.25	4.77292	0.170631	27.9721	3.54615e-172	1.3798e-169
3	maker-tulip_contig_282_pilon_pilon-augustus-gene-0.7-mRNA-1	exigua_EL1	exigua_F	1759.89	36.4907	898.189	5.59154	0.200021	27.9547	5.77674e-172	2.17747e-169
3	augustus_masked-tulip_contig_690_pilon_pilon-processed-gene-3.78-mRNA-1	exigua_EL1	exigua_F	3710.22	147.883	1929.05	4.69866	0.168255	27.9258	1.2961e-171	4.73745e-169
12	maker-tulip_contig_691_pilon_pilon-augustus-gene-3.17-mRNA-1	exigua_EL1	exigua_F	34.6772	7263.36	3649.02	-7.71245	0.276866	-27.8563	9.03399e-171	3.20494e-168
3	maker-tulip_contig_531_pilon_pilon-augustus-gene-3.29-mRNA-1	exigua_EL1	exigua_F	4126.76	216.894	2171.82	4.23171	0.153458	27.5756	2.18058e-167	7.51491e-165
5	maker-tulip_contig_505_pilon_pilon-augustus-gene-3.80-mRNA-1	exigua_EL1	exigua_F	120546	10547.8	65547.1	3.51347	0.129353	27.162	1.82849e-162	6.12647e-160
3	maker-tulip_contig_732_pilon_pilon-augustus-gene-6.12-mRNA-1	exigua_EL1	exigua_F	3443.62	64.115	1753.87	5.79567	0.213639	27.1283	4.56107e-162	1.48691e-159
3	maker-tulip_contig_506_pilon_pilon-augustus-gene-1.126-mRNA-1	exigua_EL1	exigua_F	2087.52	45.1945	1066.36	5.54692	0.206676	26.8388	1.14026e-158	3.61314e-156
3	augustus_masked-tulip_contig_408_pilon_pilon-processed-gene-0.8-mRNA-1	exigua_EL1	exigua_F	2433.61	60.7366	1247.17	5.27328	0.196487	26.8379	1.16824e-158	3.61314e-156
4	maker-tulip_contig_218_pilon_pilon-augustus-gene-0.29-mRNA-1	exigua_EL1	exigua_F	1726.7	81.6346	904.165	4.39692	0.163878	26.8305	1.42558e-158	4.29885e-156
5	maker-tulip_contig_2_pilon_pilon-augustus-gene-5.68-mRNA-1	exigua_EL1	exigua_F	2105.06	83.5335	1094.3	4.7149	0.176417	26.7258	2.35927e-157	6.94085e-155
3	maker-tulip_contig_211_pilon_pilon-augustus-gene-2.27-mRNA-1	exigua_EL1	exigua_F	1464.01	52.491	758.249	4.74837	0.178293	26.6324	2.86421e-156	8.22574e-154
3	augustus_masked-tulip_contig_208_pilon_pilon-processed-gene-1.43-mRNA-1	exigua_EL1	exigua_F	4285.09	251.031	2268.06	4.11976	0.154707	26.6294	3.09832e-156	8.69115e-154
1	maker-tulip_contig_340_pilon_pilon-augustus-gene-0.26-mRNA-1	exigua_EL1	exigua_F	1488.82	17.334	753.075	6.29385	0.236853	26.5728	1.39898e-155	3.8351e-153
9	augustus_masked-tulip_contig_270_pilon_pilon-processed-gene-0.31-mRNA-1	exigua_EL1	exigua_F	12.0843	2108.43	1060.26	-7.44397	0.28083	-26.5071	8.03691e-155	2.15425e-152
7	maker-tulip_contig_674_pilon_pilon-augustus-gene-1.23-mRNA-1	exigua_EL1	exigua_F	56.9242	2592.68	1324.8	-5.50587	0.209463	-26.2856	2.79937e-152	7.34043e-150
6	maker-tulip_contig_58_pilon_pilon-augustus-gene-0.15-mRNA-1	exigua_EL1	exigua_F	2753.47	6.36337	1379.92	8.39763	0.320146	26.2306	1.19054e-151	3.05537e-149
5	maker-tulip_contig_505_pilon_pilon-augustus-gene-3.83-mRNA-1	exigua_EL1	exigua_F	32292.1	2447.99	17370	3.71621	0.141708	26.2244	1.40027e-151	3.51876e-149
1	maker-tulip_contig_89_pilon_pilon-augustus-gene-0.9-mRNA-1	exigua_EL1	exigua_F	1082.03	11072.1	6077.06	-3.3542	0.128165	-26.1711	5.67655e-151	1.39736e-148
-	augustus_masked-tulip_contig_586_pilon_pilon-processed-gene-5.14-mRNA-1	exigua_EL1	exigua_F	1371.35	28.8846	700.116	5.60279	0.215293	26.024	2.64908e-149	6.39063e-147
1	augustus_masked-tulip_contig_581_pilon_pilon-processed-gene-4.0-mRNA-1	exigua_EL1	exigua_F	3726.44	85.4784	1905.96	5.39613	0.207425	26.0149	3.35977e-149	7.94619e-147
3	maker-tulip_contig_474_pilon_pilon-augustus-gene-5.41-mRNA-1	exigua_EL1	exigua_F	3296.36	105.075	1700.72	5.02522	0.193215	26.0084	3.97428e-149	9.21879e-147
1	maker-tulip_contig_3_pilon_pilon-augustus-gene-3.32-mRNA-1	exigua_EL1	exigua_F	1909.05	50.4247	979.738	5.22331	0.201122	25.9709	1.05658e-148	2.40462e-146
6	maker-tulip_contig_218_pilon_pilon-augustus-gene-1.109-mRNA-1	exigua_EL1	exigua_F	2858.71	9.17614	1433.94	8.2214	0.31737	25.9048	5.88385e-148	1.31428e-145
3	maker-tulip_contig_620_pilon_pilon-augustus-gene-0.59-mRNA-1	exigua_EL1	exigua_F	1578.9	48.535	813.718	5.07218	0.196999	25.7473	3.45887e-146	7.58561e-144
5	maker-tulip_contig_867_pilon_pilon-augustus-gene-2.14-mRNA-1	exigua_EL1	exigua_F	40692.2	4564.53	22628.4	3.15479	0.122584	25.7358	4.65181e-146	1.00197e-143
-	augustus_masked-tulip_contig_247_pilon_pilon-processed-gene-2.181-mRNA-1	exigua_EL1	exigua_F	5205.89	4.06457	2604.98	10.1352	0.394358	25.7004	1.15813e-145	2.45077e-143
1	maker-tulip_contig_706_pilon_pilon-augustus-gene-0.4-mRNA-1	exigua_EL1	exigua_F	511.217	5131.63	2821.42	-3.32759	0.129671	-25.6617	3.12801e-145	6.50518e-143
5	maker-tulip_contig_334_pilon_pilon-augustus-gene-4.61-mRNA-1	exigua_EL1	exigua_F	1662.03	46.5436	854.286	5.07411	0.197908	25.6388	5.63812e-145	1.15266e-142
3	maker-tulip_contig_408_pilon_pilon-augustus-gene-0.26-mRNA-1	exigua_EL1	exigua_F	2025.21	46.8596	1036.04	5.36663	0.209397	25.6289	7.26353e-145	1.46021e-142
3	maker-tulip_contig_110_pilon_pilon-augustus-gene-2.68-mRNA-1	exigua_EL1	exigua_F	1556.35	56.9796	806.667	4.7985	0.18758	25.5811	2.47431e-144	4.89265e-142
3	maker-tulip_contig_661_pilon_pilon-augustus-gene-1.27-mRNA-1	exigua_EL1	exigua_F	8505.54	414.522	4460.03	4.3348	0.169764	25.5343	8.20244e-144	1.59577e-141
12	augustus_masked-tulip_contig_645_pilon_pilon-processed-gene-3.53-mRNA-1	exigua_EL1	exigua_F	2.26684	52369.9	26186.1	-14.4832	0.570984	-25.3653	6.09283e-142	1.16654e-139
1	maker-tulip_contig_581_pilon_pilon-augustus-gene-0.6-mRNA-1	exigua_EL1	exigua_F	1198.08	39.196	618.64	4.87671	0.192746	25.3013	3.0927e-141	5.82877e-139
1	maker-tulip_contig_514_pilon_pilon-augustus-gene-0.16-mRNA-1	exigua_EL1	exigua_F	1431.63	64.5698	748.102	4.42306	0.175801	25.1595	1.11296e-139	2.06531e-137
1	maker-tulip_contig_327_pilon_pilon-augustus-gene-8.9-mRNA-1	exigua_EL1	exigua_F	1366.22	31.0302	698.627	5.45721	0.217799	25.0562	1.49488e-138	2.732e-136
-	maker-tulip_contig_287_pilon_pilon-augustus-gene-0.0-mRNA-1	exigua_EL1	exigua_F	1157.77	29.3841	593.579	5.2247	0.209473	24.9421	2.60153e-137	4.68354e-135
-	maker-tulip_contig_316_pilon_pilon-augustus-gene-2.10-mRNA-1	exigua_EL1	exigua_F	1069.32	17.1021	543.21	5.87096	0.235464	24.9335	3.22201e-137	5.71528e-135
12	maker-tulip_contig_527_pilon_pilon-augustus-gene-1.45-mRNA-1	exigua_EL1	exigua_F	3.56503	12786	6394.77	-11.7974	0.474467	-24.8646	1.79915e-136	3.14512e-134
4	maker-tulip_contig_218_pilon_pilon-augustus-gene-0.101-mRNA-1	exigua_EL1	exigua_F	22996.6	402.507	11699.5	5.84146	0.234963	24.8612	1.95538e-136	3.3694e-134
3	maker-tulip_contig_732_pilon_pilon-augustus-gene-3.13-mRNA-1	exigua_EL1	exigua_F	1616.99	98.3052	857.649	3.99381	0.160787	24.8392	3.38528e-136	5.75117e-134
1	maker-tulip_contig_778_pilon_pilon-augustus-gene-1.17-mRNA-1	exigua_EL1	exigua_F	547.248	5384.75	2966	-3.29656	0.133884	-24.6225	7.25401e-134	1.21525e-131
1	maker-tulip_contig_555_pilon_pilon-augustus-gene-2.53-mRNA-1	exigua_EL1	exigua_F	1157.64	22.7276	590.184	5.76735	0.235093	24.5322	6.69765e-133	1.10667e-130
9	maker-tulip_contig_662_pilon_pilon-augustus-gene-0.15-mRNA-1	exigua_EL1	exigua_F	2.94328	17026.2	8514.58	-12.4995	0.510145	-24.5018	1.41212e-132	2.30176e-130
5	augustus_masked-tulip_contig_281_pilon_pilon-processed-gene-2.33-mRNA-1	exigua_EL1	exigua_F	4669.28	287.538	2478.41	4.00362	0.16375	24.4496	5.08697e-132	8.1812e-130
9	maker-tulip_contig_81_pilon_pilon-augustus-gene-5.15-mRNA-1	exigua_EL1	exigua_F	26.4795	1054.64	540.56	-5.31474	0.217882	-24.3927	2.04195e-131	3.24078e-129
12	augustus_masked-tulip_contig_753_pilon_pilon-processed-gene-1.13-mRNA-1	exigua_EL1	exigua_F	62.7212	2280.12	1171.42	-5.18536	0.213272	-24.3133	1.41692e-130	2.2196e-128
1	maker-tulip_contig_132_pilon_pilon-augustus-gene-0.7-mRNA-1	exigua_EL1	exigua_F	1543.72	96.871	820.294	4.00349	0.165061	24.2546	5.90783e-130	9.13593e-128
8	augustus_masked-tulip_contig_784_pilon_pilon-processed-gene-0.44-mRNA-1	exigua_EL1	exigua_F	81.1296	3954.76	2017.94	-5.6068	0.234701	-23.8891	3.97595e-126	6.07061e-124
5	maker-tulip_contig_773_pilon_pilon-augustus-gene-2.34-mRNA-1	exigua_EL1	exigua_F	1269.31	37.6292	653.472	4.98763	0.209549	23.8018	3.20181e-125	4.82753e-123
1	maker-tulip_contig_72_pilon_pilon-augustus-gene-1.0-mRNA-1	exigua_EL1	exigua_F	1180.07	34.1488	607.109	4.9864	0.209533	23.7976	3.53467e-125	5.2636e-123
3	augustus_masked-tulip_contig_361_pilon_pilon-processed-gene-0.49-mRNA-1	exigua_EL1	exigua_F	1499.89	41.7539	770.821	5.11155	0.215588	23.7098	2.85475e-124	4.19926e-122
-	augustus_masked-tulip_contig_247_pilon_pilon-processed-gene-2.138-mRNA-1	exigua_EL1	exigua_F	2295.19	5.65691	1150.42	9.00702	0.380304	23.6838	5.30131e-124	7.70415e-122
1	maker-tulip_contig_252_pilon_pilon-augustus-gene-0.28-mRNA-1	exigua_EL1	exigua_F	3301.08	156.376	1728.73	4.41237	0.186946	23.6024	3.63893e-123	5.22533e-121
1	augustus_masked-tulip_contig_603_pilon_pilon-processed-gene-4.48-mRNA-1	exigua_EL1	exigua_F	2811.8	120.36	1466.08	4.47898	0.189962	23.5783	6.42898e-123	9.1231e-121
1	maker-tulip_contig_320_pilon_pilon-augustus-gene-0.20-mRNA-1	exigua_EL1	exigua_F	1250.9	64.9045	657.904	4.31879	0.183307	23.5604	9.81566e-123	1.3767e-120
3	maker-tulip_contig_407_pilon_pilon-augustus-gene-7.99-mRNA-1	exigua_EL1	exigua_F	2009.26	149.946	1079.6	3.72935	0.158451	23.5364	1.73123e-122	2.40024e-120
-	maker-tulip_contig_867_pilon_pilon-augustus-gene-3.67-mRNA-1	exigua_EL1	exigua_F	24.4706	978.663	501.567	-5.32052	0.226196	-23.5218	2.44284e-122	3.34836e-120
3	augustus_masked-tulip_contig_324_pilon_pilon-processed-gene-0.16-mRNA-1	exigua_EL1	exigua_F	3072.88	141.921	1607.4	4.38372	0.186634	23.4884	5.36547e-122	7.27172e-120
14	maker-tulip_contig_819_pilon_pilon-augustus-gene-2.0-mRNA-1	exigua_EL1	exigua_F	27.4691	3648.02	1837.74	-7.05614	0.300691	-23.4664	8.98797e-122	1.20459e-119
1	augustus_masked-tulip_contig_611_pilon_pilon-processed-gene-3.10-mRNA-1	exigua_EL1	exigua_F	1108.05	25.8973	566.976	5.38284	0.229686	23.4356	1.85183e-121	2.45459e-119
4	augustus_masked-tulip_contig_666_pilon_pilon-processed-gene-2.66-mRNA-1	exigua_EL1	exigua_F	2329.29	102.618	1215.96	4.51451	0.192688	23.4292	2.1563e-121	2.82709e-119
1	maker-tulip_contig_284_pilon_pilon-augustus-gene-0.0-mRNA-1	exigua_EL1	exigua_F	1031.15	13.3301	522.24	6.02144	0.257234	23.4084	3.51116e-121	4.55393e-119
7	maker-tulip_contig_547_pilon_pilon-augustus-gene-6.77-mRNA-1	exigua_EL1	exigua_F	302.686	16237.4	8270.04	-5.74459	0.245527	-23.397	4.58481e-121	5.88319e-119
12	maker-tulip_contig_175_pilon_pilon-augustus-gene-4.59-mRNA-1	exigua_EL1	exigua_F	13.6676	1388.05	700.86	-6.66015	0.285382	-23.3377	1.83873e-120	2.3346e-118
4	maker-tulip_contig_831_pilon_pilon-augustus-gene-4.54-mRNA-1	exigua_EL1	exigua_F	1597.73	15.0416	806.384	6.56925	0.283139	23.2015	4.39654e-119	5.52407e-117
4	maker-tulip_contig_687_pilon_pilon-augustus-gene-1.25-mRNA-1	exigua_EL1	exigua_F	3288.42	10.7419	1649.58	8.23304	0.355453	23.1621	1.09865e-118	1.36618e-116
3	maker-tulip_contig_33_pilon_pilon-augustus-gene-4.25-mRNA-1	exigua_EL1	exigua_F	3639.24	130.517	1884.88	4.81533	0.208163	23.1325	2.17968e-118	2.68279e-116
4	maker-tulip_contig_410_pilon_pilon-augustus-gene-0.20-mRNA-1	exigua_EL1	exigua_F	1858.11	4.35505	931.235	8.50581	0.369668	23.0093	3.76097e-117	4.58231e-115
1	maker-tulip_contig_553_pilon_pilon-augustus-gene-0.82-mRNA-1	exigua_EL1	exigua_F	40.1038	2159.27	1099.69	-5.74888	0.251989	-22.814	3.32917e-115	4.01565e-113
1	augustus_masked-tulip_contig_435_pilon_pilon-processed-gene-0.13-mRNA-1	exigua_EL1	exigua_F	2426.17	5.86067	1216.01	9.13976	0.401341	22.773	8.48572e-115	1.01341e-112
12	maker-tulip_contig_290_pilon_pilon-augustus-gene-3.18-mRNA-1	exigua_EL1	exigua_F	19.6193	905.773	462.696	-5.52566	0.2427	-22.7675	9.6333e-115	1.13919e-112
1	maker-tulip_contig_339_pilon_pilon-augustus-gene-2.14-mRNA-1	exigua_EL1	exigua_F	94.9665	1747.03	920.997	-4.20016	0.18455	-22.7589	1.17065e-114	1.37091e-112
5	maker-tulip_contig_555_pilon_pilon-augustus-gene-2.36-mRNA-1	exigua_EL1	exigua_F	17896	2105.18	10000.6	3.0845	0.135667	22.7359	1.97827e-114	2.29442e-112
3	maker-tulip_contig_218_pilon_pilon-augustus-gene-2.8-mRNA-1	exigua_EL1	exigua_F	1314.93	46.0132	680.473	4.85482	0.213804	22.7068	3.83633e-114	4.40703e-112
3	maker-tulip_contig_192_pilon_pilon-augustus-gene-1.167-mRNA-1	exigua_EL1	exigua_F	1197.34	53.6561	625.497	4.40264	0.194067	22.6862	6.13233e-114	6.97813e-112
1	maker-tulip_contig_547_pilon_pilon-augustus-gene-0.17-mRNA-1	exigua_EL1	exigua_F	773.009	17.3287	395.169	5.55208	0.245023	22.6595	1.12498e-113	1.26818e-111
3	maker-tulip_contig_513_pilon_pilon-augustus-gene-0.19-mRNA-1	exigua_EL1	exigua_F	914.12	18.1799	466.15	5.4635	0.241377	22.6347	1.97337e-113	2.20396e-111
3	maker-tulip_contig_745_pilon_pilon-augustus-gene-2.5-mRNA-1	exigua_EL1	exigua_F	1432.65	16.8132	724.732	6.19538	0.274249	22.5904	5.38936e-113	5.9639e-111
1	maker-tulip_contig_43_pilon_pilon-augustus-gene-6.43-mRNA-1	exigua_EL1	exigua_F	31060.2	3243.21	17151.7	3.25996	0.144882	22.5009	4.07102e-112	4.46406e-110
8	maker-tulip_contig_674_pilon_pilon-augustus-gene-2.12-mRNA-1	exigua_EL1	exigua_F	20.4686	1809.72	915.092	-6.45915	0.287381	-22.4759	7.14882e-112	7.76838e-110
1	maker-tulip_contig_809_pilon_pilon-augustus-gene-3.12-mRNA-1	exigua_EL1	exigua_F	1018.54	25.3488	521.944	5.27073	0.234514	22.4751	7.27816e-112	7.83832e-110
8	maker-tulip_contig_733_pilon_pilon-augustus-gene-0.18-mRNA-1	exigua_EL1	exigua_F	42.4192	1152.31	597.366	-4.76765	0.212173	-22.4706	8.04368e-112	8.58609e-110
7	maker-tulip_contig_657_pilon_pilon-augustus-gene-0.3-mRNA-1	exigua_EL1	exigua_F	59.6658	1313.87	686.767	-4.46358	0.198999	-22.4302	1.99668e-111	2.11263e-109
1	maker-tulip_contig_831_pilon_pilon-augustus-gene-0.52-mRNA-1	exigua_EL1	exigua_F	894.621	15.9891	455.305	6.018	0.268326	22.4279	2.10238e-111	2.19485e-109
1	maker-tulip_contig_185_pilon_pilon-augustus-gene-0.20-mRNA-1	exigua_EL1	exigua_F	2102.77	161.606	1132.19	3.65604	0.163014	22.4277	2.11079e-111	2.19485e-109
-	maker-tulip_contig_248_pilon_pilon-augustus-gene-0.32-mRNA-1	exigua_EL1	exigua_F	1086.36	44.7593	565.559	4.63339	0.206642	22.4223	2.38429e-111	2.45806e-109
1	maker-tulip_contig_95_pilon_pilon-augustus-gene-0.56-mRNA-1	exigua_EL1	exigua_F	1586.08	101.646	843.864	3.93429	0.17563	22.401	3.8525e-111	3.93804e-109
5	maker-tulip_contig_741_pilon_pilon-augustus-gene-0.5-mRNA-1	exigua_EL1	exigua_F	11261.3	482.85	5872.07	4.55042	0.203148	22.3995	3.98216e-111	4.03637e-109
7	augustus_masked-tulip_contig_72_pilon_pilon-processed-gene-1.136-mRNA-1	exigua_EL1	exigua_F	4346.92	65573.4	34960.2	-3.91486	0.174942	-22.378	6.44246e-111	6.47574e-109
1	maker-tulip_contig_362_pilon_pilon-augustus-gene-6.3-mRNA-1	exigua_EL1	exigua_F	1540.7	111.906	826.302	3.78864	0.169318	22.3758	6.77418e-111	6.75291e-109
3	augustus_masked-tulip_contig_916_pilon_pilon-processed-gene-0.36-mRNA-1	exigua_EL1	exigua_F	2844.97	201.923	1523.45	3.79119	0.169445	22.3742	7.02261e-111	6.94318e-109
1	augustus_masked-tulip_contig_15_pilon_pilon-processed-gene-0.15-mRNA-1	exigua_EL1	exigua_F	1466.6	46.989	756.796	5.07056	0.226639	22.3728	7.237e-111	7.09697e-109
3	maker-tulip_contig_270_pilon_pilon-augustus-gene-0.25-mRNA-1	exigua_EL1	exigua_F	839.284	15.8524	427.568	5.63524	0.252009	22.3612	9.38894e-111	9.13302e-109
5	maker-tulip_contig_516_pilon_pilon-augustus-gene-3.65-mRNA-1	exigua_EL1	exigua_F	3659.49	311.721	1985.61	3.56963	0.159638	22.3609	9.46702e-111	9.1353e-109
1	maker-tulip_contig_280_pilon_pilon-augustus-gene-1.74-mRNA-1	exigua_EL1	exigua_F	864.22	31.5281	447.874	4.75631	0.214626	22.1609	8.1844e-109	7.83494e-107
5	augustus_masked-tulip_contig_424_pilon_pilon-processed-gene-2.120-mRNA-1	exigua_EL1	exigua_F	975.262	11.177	493.22	6.33554	0.287998	21.9986	2.97283e-107	2.82349e-105
8	maker-tulip_contig_339_pilon_pilon-augustus-gene-3.21-mRNA-1	exigua_EL1	exigua_F	7.8512	1195.92	601.887	-7.25257	0.330571	-21.9395	1.09063e-106	1.02775e-104
3	maker-tulip_contig_361_pilon_pilon-augustus-gene-0.3-mRNA-1	exigua_EL1	exigua_F	875.217	15.0075	445.112	5.94905	0.271228	21.9338	1.23738e-106	1.157e-104
5	maker-tulip_contig_182_pilon_pilon-augustus-gene-1.82-mRNA-1	exigua_EL1	exigua_F	54791.5	5741.43	30266.5	3.25278	0.148427	21.915	1.86765e-106	1.73289e-104
1	maker-tulip_contig_353_pilon_pilon-augustus-gene-0.3-mRNA-1	exigua_EL1	exigua_F	1050.21	56.8503	553.53	4.14608	0.18939	21.8918	3.11092e-106	2.86143e-104
3	maker-tulip_contig_640_pilon_pilon-augustus-gene-2.1-mRNA-1	exigua_EL1	exigua_F	729.337	16.8377	373.087	5.43254	0.248157	21.8915	3.13139e-106	2.86143e-104
1	maker-tulip_contig_58_pilon_pilon-augustus-gene-4.59-mRNA-1	exigua_EL1	exigua_F	728.022	11.3808	369.701	5.91775	0.270859	21.8481	8.10618e-106	7.35163e-104
1	maker-tulip_contig_479_pilon_pilon-augustus-gene-4.20-mRNA-1	exigua_EL1	exigua_F	733.901	19.6765	376.789	5.39613	0.247346	21.8161	1.63209e-105	1.46912e-103
1	maker-tulip_contig_95_pilon_pilon-augustus-gene-0.52-mRNA-1	exigua_EL1	exigua_F	186.661	2469.61	1328.14	-3.72241	0.17094	-21.7761	3.91301e-105	3.4962e-103
4	maker-tulip_contig_525_pilon_pilon-augustus-gene-2.5-mRNA-1	exigua_EL1	exigua_F	1595.12	10.5418	802.832	7.13686	0.328333	21.7367	9.23841e-105	8.19366e-103
3	augustus_masked-tulip_contig_252_pilon_pilon-processed-gene-1.29-mRNA-1	exigua_EL1	exigua_F	1088.52	7.72533	548.122	6.82809	0.314279	21.7262	1.15899e-104	1.02042e-102
1	maker-tulip_contig_236_pilon_pilon-augustus-gene-4.47-mRNA-1	exigua_EL1	exigua_F	98.544	1371.45	734.995	-3.79757	0.175324	-21.6602	4.86625e-104	4.25338e-102
8	maker-tulip_contig_43_pilon_pilon-augustus-gene-6.50-mRNA-1	exigua_EL1	exigua_F	62.7492	912.361	487.555	-3.86586	0.178822	-21.6185	1.20363e-103	1.04447e-101
1	maker-tulip_contig_102_pilon_pilon-augustus-gene-0.46-mRNA-1	exigua_EL1	exigua_F	923.762	38.4113	481.086	4.53499	0.210215	21.5731	3.21529e-103	2.7702e-101
1	maker-tulip_contig_669_pilon_pilon-augustus-gene-0.9-mRNA-1	exigua_EL1	exigua_F	2228.58	118.521	1173.55	4.18919	0.194637	21.5231	9.46699e-103	8.09864e-101
7	augustus_masked-tulip_contig_429_pilon_pilon-processed-gene-3.22-mRNA-1	exigua_EL1	exigua_F	45.993	1509.57	777.784	-5.0425	0.234685	-21.4862	2.09417e-102	1.77886e-100
1	maker-tulip_contig_187_pilon_pilon-augustus-gene-1.26-mRNA-1	exigua_EL1	exigua_F	211.423	2380.77	1296.1	-3.4915	0.162731	-21.4556	4.04473e-102	3.41171e-100
1	maker-tulip_contig_938_pilon_pilon-augustus-gene-0.2-mRNA-1	exigua_EL1	exigua_F	27.0449	900.906	463.976	-5.05223	0.235687	-21.4361	6.15072e-102	5.15208e-100
5	maker-tulip_contig_620_pilon_pilon-augustus-gene-0.101-mRNA-1	exigua_EL1	exigua_F	21876.2	2672.07	12274.1	3.03293	0.141522	21.4308	6.89354e-102	5.73447e-100
3	maker-tulip_contig_927_pilon_pilon-augustus-gene-0.3-mRNA-1	exigua_EL1	exigua_F	1720.39	188.948	954.669	3.19212	0.149454	21.3585	3.25315e-101	2.68764e-99
3	maker-tulip_contig_407_pilon_pilon-augustus-gene-0.72-mRNA-1	exigua_EL1	exigua_F	756.029	25.7228	390.876	4.83717	0.226912	21.3174	7.82847e-101	6.42361e-99
1	augustus_masked-tulip_contig_689_pilon_pilon-processed-gene-1.6-mRNA-1	exigua_EL1	exigua_F	86.0942	1468.83	777.461	-4.09641	0.192401	-21.291	1.3765e-100	1.12185e-98
4	maker-tulip_contig_773_pilon_pilon-augustus-gene-3.20-mRNA-1	exigua_EL1	exigua_F	806.77	41.2203	423.995	4.29604	0.202077	21.2594	2.69754e-100	2.18374e-98
1	maker-tulip_contig_711_pilon_pilon-augustus-gene-2.65-mRNA-1	exigua_EL1	exigua_F	2745.66	164.752	1455.21	4.04655	0.192306	21.0422	2.69497e-98	2.16712e-96
4	maker-tulip_contig_740_pilon_pilon-augustus-gene-1.6-mRNA-1	exigua_EL1	exigua_F	9860.19	683.211	5271.7	3.84905	0.183238	21.0058	5.81013e-98	4.64118e-96
6	maker-tulip_contig_218_pilon_pilon-augustus-gene-1.105-mRNA-1	exigua_EL1	exigua_F	2378.77	3.28039	1191.03	9.5237	0.453438	21.0033	6.11303e-98	4.85101e-96
3	augustus_masked-tulip_contig_387_pilon_pilon-processed-gene-1.22-mRNA-1	exigua_EL1	exigua_F	796.794	18.4353	407.615	5.36957	0.255738	20.9963	7.08423e-98	5.58497e-96
1	maker-tulip_contig_640_pilon_pilon-augustus-gene-2.22-mRNA-1	exigua_EL1	exigua_F	1010.32	8.15946	509.238	6.98805	0.333198	20.9727	1.16462e-97	9.11835e-96
1	augustus_masked-tulip_contig_661_pilon_pilon-processed-gene-1.66-mRNA-1	exigua_EL1	exigua_F	1260.41	47.363	653.886	4.85025	0.231268	20.9724	1.17173e-97	9.11835e-96
1	maker-tulip_contig_704_pilon_pilon-augustus-gene-2.46-mRNA-1	exigua_EL1	exigua_F	706.172	33.1204	369.646	4.461	0.212896	20.9539	1.72794e-97	1.33605e-95
3	maker-tulip_contig_738_pilon_pilon-augustus-gene-1.10-mRNA-1	exigua_EL1	exigua_F	803.274	32.1984	417.736	4.55151	0.217326	20.9432	2.16514e-97	1.66344e-95
8	maker-tulip_contig_114_pilon_pilon-augustus-gene-0.2-mRNA-1	exigua_EL1	exigua_F	16.7084	841.121	428.915	-5.66036	0.270377	-20.9351	2.56635e-97	1.9592e-95
1	maker-tulip_contig_807_pilon_pilon-augustus-gene-1.25-mRNA-1	exigua_EL1	exigua_F	974.864	7056.49	4015.68	-2.85436	0.136544	-20.9043	4.89511e-97	3.71351e-95
-	maker-tulip_contig_407_pilon_pilon-augustus-gene-4.69-mRNA-1	exigua_EL1	exigua_F	103.877	1099.87	601.873	-3.40636	0.163164	-20.877	8.67324e-97	6.53854e-95
5	maker-tulip_contig_31_pilon_pilon-augustus-gene-1.64-mRNA-1	exigua_EL1	exigua_F	28261.4	3351.29	15806.3	3.07445	0.147467	20.8484	1.57663e-96	1.1812e-94
1	augustus_masked-tulip_contig_597_pilon_pilon-processed-gene-3.63-mRNA-1	exigua_EL1	exigua_F	2691.54	150.242	1420.89	4.1593	0.200562	20.7382	1.56788e-95	1.16739e-93
12	maker-tulip_contig_276_pilon_pilon-augustus-gene-1.39-mRNA-1	exigua_EL1	exigua_F	34.6022	934.135	484.369	-4.7439	0.228974	-20.7181	2.37891e-95	1.76039e-93
5	maker-tulip_contig_745_pilon_pilon-augustus-gene-3.10-mRNA-1	exigua_EL1	exigua_F	20931.9	1134.97	11033.4	4.21496	0.203817	20.6801	5.23294e-95	3.84876e-93
1	augustus_masked-tulip_contig_632_pilon_pilon-processed-gene-3.18-mRNA-1	exigua_EL1	exigua_F	1023.53	22.0381	522.783	5.42477	0.262952	20.6303	1.46826e-94	1.07334e-92
1	maker-tulip_contig_516_pilon_pilon-augustus-gene-2.31-mRNA-1	exigua_EL1	exigua_F	833.525	5.57865	419.552	6.82319	0.330763	20.6286	1.51912e-94	1.10383e-92
3	augustus_masked-tulip_contig_690_pilon_pilon-processed-gene-3.84-mRNA-1	exigua_EL1	exigua_F	917.866	50.8535	484.36	4.24873	0.205983	20.6266	1.58467e-94	1.14457e-92
1	augustus_masked-tulip_contig_674_pilon_pilon-processed-gene-3.23-mRNA-1	exigua_EL1	exigua_F	763.658	10.6604	387.159	5.88417	0.285288	20.6254	1.62362e-94	1.16572e-92
1	maker-tulip_contig_508_pilon_pilon-augustus-gene-1.33-mRNA-1	exigua_EL1	exigua_F	2770.47	429.052	1599.76	2.68133	0.130289	20.5798	4.16173e-94	2.97034e-92
1	maker-tulip_contig_702_pilon_pilon-augustus-gene-0.44-mRNA-1	exigua_EL1	exigua_F	609.552	16.2014	312.877	5.15893	0.251093	20.5459	8.37624e-94	5.94319e-92
1	maker-tulip_contig_515_pilon_pilon-augustus-gene-2.1-mRNA-1	exigua_EL1	exigua_F	126.445	1234.38	680.413	-3.28783	0.160147	-20.5301	1.15896e-93	8.1751e-92
1	maker-tulip_contig_284_pilon_pilon-augustus-gene-1.33-mRNA-1	exigua_EL1	exigua_F	789.248	13.6466	401.447	5.68791	0.277183	20.5204	1.41551e-93	9.92665e-92
5	maker-tulip_contig_316_pilon_pilon-augustus-gene-1.33-mRNA-1	exigua_EL1	exigua_F	3238.63	289.628	1764.13	3.46058	0.168846	20.4954	2.36503e-93	1.64896e-91
3	maker-tulip_contig_356_pilon_pilon-augustus-gene-1.38-mRNA-1	exigua_EL1	exigua_F	2226.72	176.884	1201.8	3.60907	0.176099	20.4945	2.41061e-93	1.67108e-91
3	maker-tulip_contig_535_pilon_pilon-augustus-gene-0.1-mRNA-1	exigua_EL1	exigua_F	637.243	17.567	327.405	5.08471	0.24829	20.4789	3.32296e-93	2.29037e-91
9	maker-tulip_contig_78_pilon_pilon-augustus-gene-0.55-mRNA-1	exigua_EL1	exigua_F	10.4973	2489.17	1249.83	-7.89491	0.387673	-20.3649	3.42793e-92	2.3493e-90
1	maker-tulip_contig_868_pilon_pilon-augustus-gene-0.59-mRNA-1	exigua_EL1	exigua_F	24.4352	807.958	416.197	-5.04106	0.247604	-20.3594	3.8332e-92	2.61221e-90
1	maker-tulip_contig_327_pilon_pilon-augustus-gene-10.63-mRNA-1	exigua_EL1	exigua_F	902.869	9.90815	456.389	6.15179	0.302343	20.3471	4.9277e-92	3.33921e-90
4	maker-tulip_contig_707_pilon_pilon-augustus-gene-0.70-mRNA-1	exigua_EL1	exigua_F	4256.57	176.132	2216.35	4.58934	0.225714	20.3326	6.62292e-92	4.46289e-90
8	augustus_masked-tulip_contig_584_pilon_pilon-processed-gene-3.74-mRNA-1	exigua_EL1	exigua_F	25.7488	800.379	413.064	-4.95179	0.243826	-20.3087	1.07707e-91	7.21758e-90
8	maker-tulip_contig_309_pilon_pilon-augustus-gene-0.39-mRNA-1	exigua_EL1	exigua_F	31.2973	819.863	425.58	-4.70426	0.23264	-20.2212	6.37263e-91	4.24678e-89
14	maker-tulip_contig_391_pilon_pilon-augustus-gene-0.13-mRNA-1	exigua_EL1	exigua_F	24.5375	968.824	496.681	-5.3144	0.263563	-20.1637	2.04064e-90	1.35243e-88
1	maker-tulip_contig_407_pilon_pilon-augustus-gene-6.40-mRNA-1	exigua_EL1	exigua_F	750.79	6.88051	378.835	6.79628	0.337071	20.1627	2.0801e-90	1.37105e-88
1	maker-tulip_contig_605_pilon_pilon-augustus-gene-0.61-mRNA-1	exigua_EL1	exigua_F	8.46605	840.287	424.377	-6.62404	0.32871	-20.1516	2.60348e-90	1.7067e-88
1	maker-tulip_contig_710_pilon_pilon-augustus-gene-0.88-mRNA-1	exigua_EL1	exigua_F	792.21	38.998	415.604	4.22427	0.210552	20.0629	1.55865e-89	1.01624e-87
1	maker-tulip_contig_244_pilon_pilon-augustus-gene-0.33-mRNA-1	exigua_EL1	exigua_F	648.992	12.5459	330.769	5.4778	0.2731	20.0578	1.72408e-89	1.11469e-87
4	maker-tulip_contig_827_pilon_pilon-augustus-gene-1.23-mRNA-1	exigua_EL1	exigua_F	708.669	19.011	363.84	5.31669	0.26507	20.0577	1.72813e-89	1.11469e-87
1	maker-tulip_contig_603_pilon_pilon-augustus-gene-3.77-mRNA-1	exigua_EL1	exigua_F	830.43	25.5462	427.988	5.05989	0.25252	20.0376	2.58873e-89	1.66092e-87
1	maker-tulip_contig_303_pilon_pilon-augustus-gene-2.14-mRNA-1	exigua_EL1	exigua_F	1871.86	214.811	1043.34	3.1319	0.156309	20.0366	2.64096e-89	1.68547e-87
1	augustus_masked-tulip_contig_610_pilon_pilon-processed-gene-2.22-mRNA-1	exigua_EL1	exigua_F	692.44	22.6807	357.56	4.77112	0.23813	20.0358	2.68694e-89	1.70578e-87
3	maker-tulip_contig_674_pilon_pilon-augustus-gene-10.6-mRNA-1	exigua_EL1	exigua_F	636.996	8.04507	322.521	6.00569	0.300344	19.996	5.96502e-89	3.76702e-87
8	maker-tulip_contig_553_pilon_pilon-augustus-gene-0.98-mRNA-1	exigua_EL1	exigua_F	28.3999	891.903	460.151	-4.96082	0.248577	-19.9569	1.30595e-88	8.20438e-87
1	maker-tulip_contig_323_pilon_pilon-augustus-gene-3.22-mRNA-1	exigua_EL1	exigua_F	1247.74	17.0638	632.403	6.31834	0.317276	19.9143	3.05628e-88	1.91009e-86
1	maker-tulip_contig_260_pilon_pilon-augustus-gene-0.30-mRNA-1	exigua_EL1	exigua_F	1140.51	99.223	619.866	3.54084	0.17788	19.9058	3.62665e-88	2.25488e-86
1	maker-tulip_contig_538_pilon_pilon-augustus-gene-0.62-mRNA-1	exigua_EL1	exigua_F	589.816	16.9484	303.382	5.32092	0.268283	19.8333	1.53699e-87	9.50729e-86
3	maker-tulip_contig_474_pilon_pilon-augustus-gene-5.46-mRNA-1	exigua_EL1	exigua_F	892.683	22.9888	457.836	5.3474	0.269928	19.8105	2.41766e-87	1.48785e-85
1	maker-tulip_contig_236_pilon_pilon-augustus-gene-2.4-mRNA-1	exigua_EL1	exigua_F	615.432	19.8015	317.617	4.90054	0.247468	19.8027	2.82038e-87	1.72688e-85
5	augustus_masked-tulip_contig_441_pilon_pilon-processed-gene-4.15-mRNA-1	exigua_EL1	exigua_F	4075.21	187.646	2131.43	4.43014	0.223839	19.7917	3.51294e-87	2.14006e-85
1	augustus_masked-tulip_contig_280_pilon_pilon-processed-gene-1.16-mRNA-1	exigua_EL1	exigua_F	78.3572	940.073	509.215	-3.58352	0.181837	-19.7073	1.86822e-86	1.13238e-84
-	maker-tulip_contig_247_pilon_pilon-augustus-gene-1.47-mRNA-1	exigua_EL1	exigua_F	669.829	14.1435	341.986	5.30958	0.269595	19.6947	2.39545e-86	1.4447e-84
6	augustus_masked-tulip_contig_430_pilon_pilon-processed-gene-0.20-mRNA-1	exigua_EL1	exigua_F	2053.34	3.60013	1028.47	9.18764	0.468552	19.6086	1.3059e-85	7.83669e-84
3	maker-tulip_contig_282_pilon_pilon-augustus-gene-0.6-mRNA-1	exigua_EL1	exigua_F	613.856	8.65264	311.254	6.03517	0.307889	19.6018	1.49389e-85	8.92043e-84
8	augustus_masked-tulip_contig_714_pilon_pilon-processed-gene-0.82-mRNA-1	exigua_EL1	exigua_F	8.77704	842.601	425.689	-6.58512	0.336042	-19.5961	1.66932e-85	9.91887e-84
1	maker-tulip_contig_604_pilon_pilon-augustus-gene-3.69-mRNA-1	exigua_EL1	exigua_F	247.132	2539.86	1393.5	-3.35975	0.171817	-19.5542	3.80049e-85	2.24713e-83
3	maker-tulip_contig_654_pilon_pilon-augustus-gene-1.110-mRNA-1	exigua_EL1	exigua_F	575.172	12.8343	294.003	5.43252	0.277976	19.5431	4.72012e-85	2.77727e-83
1	maker-tulip_contig_632_pilon_pilon-augustus-gene-3.36-mRNA-1	exigua_EL1	exigua_F	566.58	13.6419	290.111	5.51264	0.282274	19.5294	6.17932e-85	3.6182e-83
5	maker-tulip_contig_407_pilon_pilon-augustus-gene-2.36-mRNA-1	exigua_EL1	exigua_F	791.369	47.2555	419.312	4.10759	0.210518	19.5118	8.71896e-85	5.08059e-83
1	maker-tulip_contig_345_pilon_pilon-augustus-gene-1.64-mRNA-1	exigua_EL1	exigua_F	563.063	16.9568	290.01	4.9654	0.254518	19.509	9.20496e-85	5.33799e-83
3	augustus_masked-tulip_contig_732_pilon_pilon-processed-gene-3.31-mRNA-1	exigua_EL1	exigua_F	839.693	56.8695	448.281	3.87245	0.198628	19.496	1.18807e-84	6.85669e-83
1	augustus_masked-tulip_contig_657_pilon_pilon-processed-gene-0.8-mRNA-1	exigua_EL1	exigua_F	284.415	2622.32	1453.37	-3.20497	0.16462	-19.4689	2.01492e-84	1.15733e-82
4	augustus_masked-tulip_contig_217_pilon_pilon-processed-gene-4.45-mRNA-1	exigua_EL1	exigua_F	584.734	26.905	305.819	4.52773	0.232596	19.4661	2.13078e-84	1.21808e-82
1	maker-tulip_contig_702_pilon_pilon-augustus-gene-0.48-mRNA-1	exigua_EL1	exigua_F	561.096	12.2496	286.673	5.53562	0.28483	19.4348	3.92104e-84	2.23092e-82
1	maker-tulip_contig_640_pilon_pilon-augustus-gene-0.6-mRNA-1	exigua_EL1	exigua_F	576.958	18.7869	297.872	4.80353	0.24739	19.4169	5.5575e-84	3.14717e-82
3	augustus_masked-tulip_contig_331_pilon_pilon-processed-gene-2.29-mRNA-1	exigua_EL1	exigua_F	553.581	12.7172	283.149	5.31795	0.273895	19.416	5.6522e-84	3.18583e-82
1	maker-tulip_contig_639_pilon_pilon-augustus-gene-0.9-mRNA-1	exigua_EL1	exigua_F	834.467	55.0149	444.741	3.92458	0.2029	19.3424	2.36331e-83	1.32587e-81
1	maker-tulip_contig_20_pilon_pilon-augustus-gene-0.28-mRNA-1	exigua_EL1	exigua_F	930.694	88.794	509.744	3.43286	0.177658	19.3229	3.44875e-83	1.92587e-81
1	maker-tulip_contig_895_pilon_pilon-augustus-gene-3.22-mRNA-1	exigua_EL1	exigua_F	3139.9	367.286	1753.59	3.08185	0.159634	19.3057	4.81049e-83	2.67392e-81
12	maker-tulip_contig_668_pilon_pilon-augustus-gene-0.11-mRNA-1	exigua_EL1	exigua_F	3.6095	1774.04	888.824	-8.94477	0.46371	-19.2896	6.5684e-83	3.63431e-81
7	maker-tulip_contig_396_pilon_pilon-augustus-gene-0.15-mRNA-1	exigua_EL1	exigua_F	75.6324	2386.61	1231.12	-4.97543	0.257962	-19.2874	6.85002e-83	3.77283e-81
-	maker-tulip_contig_321_pilon_pilon-augustus-gene-1.41-mRNA-1	exigua_EL1	exigua_F	1444.58	33.4289	739.006	5.2225	0.271015	19.2702	9.56439e-83	5.24389e-81
1	maker-tulip_contig_784_pilon_pilon-augustus-gene-0.22-mRNA-1	exigua_EL1	exigua_F	544.523	10.803	277.663	5.51445	0.286241	19.265	1.05626e-82	5.765e-81
3	maker-tulip_contig_42_pilon_pilon-augustus-gene-0.2-mRNA-1	exigua_EL1	exigua_F	2660.12	230.892	1445.5	3.57152	0.185549	19.2483	1.45747e-82	7.91891e-81
-	maker-tulip_contig_72_pilon_pilon-augustus-gene-2.22-mRNA-1	exigua_EL1	exigua_F	760.56	30.6093	395.585	4.45566	0.231702	19.2301	2.07148e-82	1.12046e-80
1	maker-tulip_contig_145_pilon_pilon-augustus-gene-2.51-mRNA-1	exigua_EL1	exigua_F	214.245	1720.76	967.503	-3.00267	0.156373	-19.202	3.56337e-82	1.91881e-80
1	augustus_masked-tulip_contig_327_pilon_pilon-processed-gene-10.23-mRNA-1	exigua_EL1	exigua_F	619.038	4.59071	311.814	6.6565	0.346828	19.1925	4.27456e-82	2.29155e-80
1	augustus_masked-tulip_contig_55_pilon_pilon-processed-gene-0.5-mRNA-1	exigua_EL1	exigua_F	726.254	37.6872	381.971	4.1799	0.218387	19.1399	1.17599e-81	6.27644e-80
14	maker-tulip_contig_334_pilon_pilon-augustus-gene-2.35-mRNA-1	exigua_EL1	exigua_F	20.5911	708.21	364.4	-5.112	0.267348	-19.1211	1.68405e-81	8.94849e-80
1	augustus_masked-tulip_contig_586_pilon_pilon-processed-gene-9.8-mRNA-1	exigua_EL1	exigua_F	657.176	5.19828	331.187	6.89841	0.361205	19.0983	2.60837e-81	1.37992e-79
1	augustus_masked-tulip_contig_715_pilon_pilon-processed-gene-5.18-mRNA-1	exigua_EL1	exigua_F	1117.32	149.365	633.344	2.88883	0.151285	19.0953	2.76525e-81	1.45652e-79
1	maker-tulip_contig_515_pilon_pilon-augustus-gene-1.34-mRNA-1	exigua_EL1	exigua_F	543.12	9.64058	276.38	5.67972	0.298303	19.0401	7.93713e-81	4.16251e-79
5	maker-tulip_contig_3_pilon_pilon-augustus-gene-4.39-mRNA-1	exigua_EL1	exigua_F	557.631	26.9986	292.315	4.36997	0.229665	19.0276	1.00686e-80	5.25744e-79
5	maker-tulip_contig_586_pilon_pilon-augustus-gene-10.51-mRNA-1	exigua_EL1	exigua_F	972.79	30.7057	501.748	5.09572	0.268026	19.012	1.35605e-80	7.05027e-79
1	augustus_masked-tulip_contig_711_pilon_pilon-processed-gene-2.24-mRNA-1	exigua_EL1	exigua_F	32.0387	697.592	364.815	-4.44734	0.234014	-19.0046	1.56234e-80	8.08798e-79
8	maker-tulip_contig_88_pilon_pilon-augustus-gene-0.57-mRNA-1	exigua_EL1	exigua_F	19.223	598.682	308.953	-4.96106	0.261192	-18.9939	1.91449e-80	9.86864e-79
4	augustus_masked-tulip_contig_145_pilon_pilon-processed-gene-4.0-mRNA-1	exigua_EL1	exigua_F	617.728	8.59518	313.162	6.157	0.325428	18.9197	7.85433e-80	4.03145e-78
8	maker-tulip_contig_195_pilon_pilon-augustus-gene-0.21-mRNA-1	exigua_EL1	exigua_F	23.1915	621.876	322.534	-4.73798	0.25052	-18.9126	8.97727e-80	4.5883e-78
4	maker-tulip_contig_516_pilon_pilon-augustus-gene-3.29-mRNA-1	exigua_EL1	exigua_F	1290.95	187.467	739.209	2.79268	0.147718	18.9055	1.02795e-79	5.23169e-78
1	augustus_masked-tulip_contig_208_pilon_pilon-processed-gene-1.39-mRNA-1	exigua_EL1	exigua_F	759.839	54.1073	406.973	3.85214	0.203953	18.8874	1.44837e-79	7.34045e-78
4	maker-tulip_contig_687_pilon_pilon-augustus-gene-0.23-mRNA-1	exigua_EL1	exigua_F	1340.1	92.2547	716.177	3.85352	0.204146	18.8763	1.78785e-79	9.02305e-78
1	maker-tulip_contig_31_pilon_pilon-augustus-gene-1.70-mRNA-1	exigua_EL1	exigua_F	1783.28	143.929	963.604	3.59256	0.190592	18.8495	2.96807e-79	1.4917e-77
1	augustus_masked-tulip_contig_477_pilon_pilon-processed-gene-1.18-mRNA-1	exigua_EL1	exigua_F	153.856	1403.72	778.788	-3.18283	0.169264	-18.804	7.00331e-79	3.50514e-77
1	augustus_masked-tulip_contig_35_pilon_pilon-processed-gene-0.158-mRNA-1	exigua_EL1	exigua_F	4414.61	889.662	2652.14	2.307	0.122759	18.7929	8.63878e-79	4.30582e-77
1	maker-tulip_contig_611_pilon_pilon-augustus-gene-1.12-mRNA-1	exigua_EL1	exigua_F	561.868	6.65331	284.26	5.94545	0.316613	18.7783	1.13658e-78	5.64172e-77
14	maker-tulip_contig_446_pilon_pilon-augustus-gene-1.12-mRNA-1	exigua_EL1	exigua_F	11.1105	1059.83	535.473	-6.58259	0.350716	-18.769	1.35429e-78	6.69487e-77
1	maker-tulip_contig_441_pilon_pilon-augustus-gene-7.12-mRNA-1	exigua_EL1	exigua_F	500.179	6.94115	253.56	5.91217	0.315081	18.7639	1.4894e-78	7.3327e-77
-	maker-tulip_contig_281_pilon_pilon-augustus-gene-5.37-mRNA-1	exigua_EL1	exigua_F	646.672	43.4058	345.039	3.83531	0.204884	18.7194	3.43772e-78	1.6856e-76
1	augustus_masked-tulip_contig_407_pilon_pilon-processed-gene-1.8-mRNA-1	exigua_EL1	exigua_F	68.7659	1018.22	543.495	-3.88071	0.207357	-18.7151	3.72676e-78	1.81992e-76
3	maker-tulip_contig_3_pilon_pilon-augustus-gene-2.27-mRNA-1	exigua_EL1	exigua_F	855.876	100.101	477.988	3.06925	0.164134	18.6997	4.97878e-78	2.42153e-76
5	augustus_masked-tulip_contig_800_pilon_pilon-processed-gene-1.10-mRNA-1	exigua_EL1	exigua_F	1849.01	123.482	986.246	3.92467	0.209948	18.6935	5.58829e-78	2.70707e-76
1	maker-tulip_contig_143_pilon_pilon-augustus-gene-0.4-mRNA-1	exigua_EL1	exigua_F	488.045	8.88248	248.464	5.8792	0.314553	18.6907	5.89659e-78	2.84498e-76
8	maker-tulip_contig_211_pilon_pilon-augustus-gene-2.47-mRNA-1	exigua_EL1	exigua_F	14.3633	602.482	308.422	-5.39267	0.288775	-18.6743	8.0163e-78	3.8523e-76
1	maker-tulip_contig_698_pilon_pilon-augustus-gene-1.26-mRNA-1	exigua_EL1	exigua_F	534.73	22.4419	278.586	4.50397	0.241429	18.6554	1.14052e-77	5.4591e-76
1	maker-tulip_contig_504_pilon_pilon-augustus-gene-3.7-mRNA-1	exigua_EL1	exigua_F	535.663	5.37225	270.517	6.44418	0.345701	18.6409	1.49717e-77	7.13791e-76
1	maker-tulip_contig_648_pilon_pilon-augustus-gene-1.13-mRNA-1	exigua_EL1	exigua_F	3296.8	562.99	1929.89	2.54938	0.137036	18.6038	2.99227e-77	1.42097e-75
7	augustus_masked-tulip_contig_161_pilon_pilon-processed-gene-0.16-mRNA-1	exigua_EL1	exigua_F	340.859	4222	2281.43	-3.63061	0.19522	-18.5976	3.36175e-77	1.59017e-75
1	maker-tulip_contig_130_pilon_pilon-augustus-gene-0.28-mRNA-1	exigua_EL1	exigua_F	526.108	14.4292	270.269	5.17777	0.278593	18.5854	4.21457e-77	1.98579e-75
3	augustus_masked-tulip_contig_77_pilon_pilon-processed-gene-1.18-mRNA-1	exigua_EL1	exigua_F	3287.73	542.804	1915.27	2.58606	0.13923	18.5741	5.21005e-77	2.44528e-75
1	maker-tulip_contig_33_pilon_pilon-augustus-gene-5.2-mRNA-1	exigua_EL1	exigua_F	9372.66	1389.49	5381.08	2.74511	0.14784	18.5682	5.81376e-77	2.71804e-75
6	maker-tulip_contig_112_pilon_pilon-augustus-gene-2.26-mRNA-1	exigua_EL1	exigua_F	2324.08	1.51091	1162.79	10.196	0.549696	18.5484	8.40644e-77	3.915e-75
6	maker-tulip_contig_218_pilon_pilon-augustus-gene-1.104-mRNA-1	exigua_EL1	exigua_F	2570.36	1.42366	1285.89	10.3503	0.559029	18.5148	1.56799e-76	7.27428e-75
1	augustus_masked-tulip_contig_619_pilon_pilon-processed-gene-1.44-mRNA-1	exigua_EL1	exigua_F	53.9346	627.203	340.569	-3.53629	0.191239	-18.4914	2.42028e-76	1.11852e-74
1	maker-tulip_contig_234_pilon_pilon-augustus-gene-3.15-mRNA-1	exigua_EL1	exigua_F	625.937	14.8325	320.385	5.42905	0.293777	18.4802	2.9835e-76	1.37355e-74
1	augustus_masked-tulip_contig_618_pilon_pilon-processed-gene-0.3-mRNA-1	exigua_EL1	exigua_F	672.522	35.1809	353.851	4.32112	0.234469	18.4294	7.63675e-76	3.50245e-74
1	maker-tulip_contig_706_pilon_pilon-augustus-gene-0.3-mRNA-1	exigua_EL1	exigua_F	96.2463	1068.95	582.6	-3.46955	0.189141	-18.3437	3.70606e-75	1.69327e-73
1	augustus_masked-tulip_contig_597_pilon_pilon-processed-gene-5.47-mRNA-1	exigua_EL1	exigua_F	1163.05	165.733	664.394	2.80054	0.152751	18.334	4.42889e-75	2.0159e-73
6	maker-tulip_contig_218_pilon_pilon-augustus-gene-1.47-mRNA-1	exigua_EL1	exigua_F	4841.45	1.13318	2421.29	11.6692	0.637353	18.3089	7.02793e-75	3.18688e-73
1	maker-tulip_contig_89_pilon_pilon-augustus-gene-0.30-mRNA-1	exigua_EL1	exigua_F	815.879	34.9553	425.417	4.5564	0.249148	18.2879	1.03321e-74	4.66762e-73
1	maker-tulip_contig_538_pilon_pilon-augustus-gene-0.52-mRNA-1	exigua_EL1	exigua_F	774.776	30.4327	402.604	4.54754	0.249375	18.2358	2.68488e-74	1.2084e-72
1	maker-tulip_contig_597_pilon_pilon-augustus-gene-3.27-mRNA-1	exigua_EL1	exigua_F	758.107	23.3006	390.704	5.3147	0.291839	18.2111	4.21746e-74	1.89112e-72
1	augustus_masked-tulip_contig_323_pilon_pilon-processed-gene-2.36-mRNA-1	exigua_EL1	exigua_F	1576.56	111.096	843.83	3.82875	0.210728	18.1691	9.06386e-74	4.04919e-72
7	augustus_masked-tulip_contig_638_pilon_pilon-processed-gene-0.35-mRNA-1	exigua_EL1	exigua_F	26.0344	1639.14	832.587	-5.97489	0.32951	-18.1327	1.75995e-73	7.83342e-72
4	maker-tulip_contig_491_pilon_pilon-augustus-gene-1.67-mRNA-1	exigua_EL1	exigua_F	690.137	44.8502	367.494	3.96005	0.219404	18.0491	8.01254e-73	3.55321e-71
1	maker-tulip_contig_907_pilon_pilon-augustus-gene-8.20-mRNA-1	exigua_EL1	exigua_F	586.849	13.9068	300.378	5.44801	0.302105	18.0335	1.0633e-72	4.69801e-71
3	maker-tulip_contig_451_pilon_pilon-augustus-gene-1.46-mRNA-1	exigua_EL1	exigua_F	6086.93	1089.45	3588.19	2.48035	0.137555	18.0318	1.09735e-72	4.83074e-71
1	augustus_masked-tulip_contig_677_pilon_pilon-processed-gene-0.26-mRNA-1	exigua_EL1	exigua_F	534.865	19.2775	277.071	4.69726	0.260697	18.0181	1.40591e-72	6.16656e-71
1	maker-tulip_contig_516_pilon_pilon-augustus-gene-3.14-mRNA-1	exigua_EL1	exigua_F	826.952	9.52143	418.237	6.45531	0.358285	18.0173	1.42612e-72	6.23258e-71
-	augustus_masked-tulip_contig_192_pilon_pilon-processed-gene-1.35-mRNA-1	exigua_EL1	exigua_F	83.626	752.502	418.064	-3.16281	0.175551	-18.0164	1.44812e-72	6.30587e-71
1	maker-tulip_contig_327_pilon_pilon-augustus-gene-7.44-mRNA-1	exigua_EL1	exigua_F	476.329	17.6453	246.987	4.89223	0.271552	18.0158	1.46457e-72	6.35455e-71
14	maker-tulip_contig_292_pilon_pilon-augustus-gene-1.19-mRNA-1	exigua_EL1	exigua_F	13.6797	600.742	307.211	-5.46543	0.303612	-18.0014	1.90114e-72	8.2192e-71
1	augustus_masked-tulip_contig_15_pilon_pilon-processed-gene-2.9-mRNA-1	exigua_EL1	exigua_F	1479.41	200.206	839.81	2.9028	0.161368	17.9887	2.38829e-72	1.02884e-70
1	augustus_masked-tulip_contig_504_pilon_pilon-processed-gene-0.8-mRNA-1	exigua_EL1	exigua_F	493.578	7.54554	250.562	6.15406	0.342382	17.9742	3.10053e-72	1.33091e-70
1	maker-tulip_contig_2_pilon_pilon-augustus-gene-8.14-mRNA-1	exigua_EL1	exigua_F	139.889	2724.43	1432.16	-4.28258	0.238421	-17.9623	3.84816e-72	1.64598e-70
1	maker-tulip_contig_217_pilon_pilon-augustus-gene-3.45-mRNA-1	exigua_EL1	exigua_F	370.129	2471.83	1420.98	-2.74089	0.152641	-17.9564	4.27501e-72	1.82209e-70
1	maker-tulip_contig_39_pilon_pilon-augustus-gene-0.18-mRNA-1	exigua_EL1	exigua_F	460.671	4830.32	2645.5	-3.38944	0.188818	-17.9508	4.72878e-72	2.0084e-70
7	augustus_masked-tulip_contig_323_pilon_pilon-processed-gene-8.0-mRNA-1	exigua_EL1	exigua_F	127.121	2306.25	1216.68	-4.18232	0.23313	-17.9399	5.75925e-72	2.43748e-70
3	maker-tulip_contig_827_pilon_pilon-augustus-gene-2.67-mRNA-1	exigua_EL1	exigua_F	577.709	6.42083	292.065	6.03761	0.336958	17.918	8.53034e-72	3.59766e-70
1	augustus_masked-tulip_contig_22_pilon_pilon-processed-gene-0.28-mRNA-1	exigua_EL1	exigua_F	510.382	26.6554	268.518	4.15716	0.232276	17.8975	1.2336e-71	5.18455e-70
3	maker-tulip_contig_361_pilon_pilon-augustus-gene-1.2-mRNA-1	exigua_EL1	exigua_F	571.091	30.2407	300.666	4.36382	0.244312	17.8616	2.34731e-71	9.83097e-70
8	maker-tulip_contig_531_pilon_pilon-augustus-gene-3.5-mRNA-1	exigua_EL1	exigua_F	19.2384	519.135	269.187	-4.75901	0.266909	-17.8301	4.12612e-71	1.72212e-69
1	maker-tulip_contig_674_pilon_pilon-augustus-gene-4.0-mRNA-1	exigua_EL1	exigua_F	481.173	6.96776	244.07	6.14703	0.345227	17.8058	6.37518e-71	2.65163e-69
5	maker-tulip_contig_58_pilon_pilon-augustus-gene-4.16-mRNA-1	exigua_EL1	exigua_F	5075.51	556.512	2816.01	3.18191	0.178887	17.7873	8.86175e-71	3.67321e-69
3	augustus_masked-tulip_contig_604_pilon_pilon-processed-gene-3.6-mRNA-1	exigua_EL1	exigua_F	20.8918	491.694	256.293	-4.56584	0.257381	-17.7396	2.07308e-70	8.56351e-69
12	maker-tulip_contig_422_pilon_pilon-augustus-gene-0.17-mRNA-1	exigua_EL1	exigua_F	2.26684	2415.9	1209.08	-10.0477	0.566692	-17.7304	2.44367e-70	1.00599e-68
3	augustus_masked-tulip_contig_570_pilon_pilon-processed-gene-0.56-mRNA-1	exigua_EL1	exigua_F	1837.01	193.096	1015.05	3.26126	0.184009	17.7233	2.77005e-70	1.13647e-68
1	maker-tulip_contig_525_pilon_pilon-augustus-gene-2.34-mRNA-1	exigua_EL1	exigua_F	457.149	17.4191	237.284	4.719	0.266272	17.7225	2.81122e-70	1.14945e-68
8	maker-tulip_contig_70_pilon_pilon-augustus-gene-0.37-mRNA-1	exigua_EL1	exigua_F	41.5021	566.958	304.23	-3.77648	0.213175	-17.7154	3.19074e-70	1.30023e-68
1	maker-tulip_contig_407_pilon_pilon-augustus-gene-7.45-mRNA-1	exigua_EL1	exigua_F	20.6118	599.577	310.094	-4.87068	0.275009	-17.711	3.45153e-70	1.40176e-68
1	maker-tulip_contig_121_pilon_pilon-augustus-gene-1.8-mRNA-1	exigua_EL1	exigua_F	519.4	6.88316	263.142	6.00733	0.339492	17.6951	4.57675e-70	1.85251e-68
1	maker-tulip_contig_42_pilon_pilon-augustus-gene-1.7-mRNA-1	exigua_EL1	exigua_F	479.522	22.3264	250.924	4.38954	0.248166	17.6879	5.19922e-70	2.09743e-68
1	augustus_masked-tulip_contig_420_pilon_pilon-processed-gene-0.1-mRNA-1	exigua_EL1	exigua_F	472.555	13.5828	243.069	5.16675	0.292705	17.6517	9.8715e-70	3.969e-68
3	maker-tulip_contig_320_pilon_pilon-augustus-gene-0.0-mRNA-1	exigua_EL1	exigua_F	1406.41	204.823	805.614	2.80267	0.158984	17.6286	1.48478e-69	5.94997e-68
1	maker-tulip_contig_645_pilon_pilon-augustus-gene-0.29-mRNA-1	exigua_EL1	exigua_F	382.332	2033.28	1207.81	-2.40842	0.137531	-17.5118	1.1642e-68	4.64985e-67
5	augustus_masked-tulip_contig_916_pilon_pilon-processed-gene-3.4-mRNA-1	exigua_EL1	exigua_F	8735.85	995.616	4865.73	3.12462	0.178455	17.5093	1.21651e-68	4.84275e-67
6	maker-tulip_contig_710_pilon_pilon-augustus-gene-0.65-mRNA-1	exigua_EL1	exigua_F	1414.98	20.7633	717.872	5.98278	0.342123	17.4872	1.79323e-68	7.11513e-67
5	maker-tulip_contig_333_pilon_pilon-augustus-gene-1.31-mRNA-1	exigua_EL1	exigua_F	100.305	1278.14	689.221	-3.6756	0.210408	-17.4689	2.47139e-68	9.77374e-67
1	maker-tulip_contig_100_pilon_pilon-augustus-gene-0.6-mRNA-1	exigua_EL1	exigua_F	539.662	2.99256	271.327	7.01888	0.401837	17.467	2.55685e-68	1.00787e-66
8	maker-tulip_contig_363_pilon_pilon-augustus-gene-1.3-mRNA-1	exigua_EL1	exigua_F	9.08636	550.021	279.554	-5.91417	0.339127	-17.4394	4.14287e-68	1.62431e-66
3	augustus_masked-tulip_contig_669_pilon_pilon-processed-gene-2.29-mRNA-1	exigua_EL1	exigua_F	468.104	9.75392	238.929	5.59445	0.320795	17.4394	4.14763e-68	1.62431e-66
12	maker-tulip_contig_505_pilon_pilon-augustus-gene-3.46-mRNA-1	exigua_EL1	exigua_F	8.11082	718.017	363.064	-6.46411	0.370766	-17.4345	4.51516e-68	1.76252e-66
12	maker-tulip_contig_732_pilon_pilon-augustus-gene-4.50-mRNA-1	exigua_EL1	exigua_F	12.9505	223014	111513	-14.0698	0.807146	-17.4315	4.75464e-68	1.85002e-66
1	augustus_masked-tulip_contig_33_pilon_pilon-processed-gene-5.37-mRNA-1	exigua_EL1	exigua_F	799.093	68.7493	433.921	3.52041	0.202192	17.4112	6.78282e-68	2.63069e-66
1	maker-tulip_contig_159_pilon_pilon-augustus-gene-2.31-mRNA-1	exigua_EL1	exigua_F	476.123	15.9135	246.018	4.74478	0.272944	17.3837	1.09585e-67	4.2366e-66
1	maker-tulip_contig_506_pilon_pilon-augustus-gene-0.17-mRNA-1	exigua_EL1	exigua_F	446.681	8.07168	227.376	5.72513	0.329772	17.3609	1.63242e-67	6.29083e-66
-	maker-tulip_contig_46_pilon_pilon-augustus-gene-0.18-mRNA-1	exigua_EL1	exigua_F	6.55444	557.025	281.79	-6.41152	0.369769	-17.3393	2.37776e-67	9.13391e-66
1	maker-tulip_contig_303_pilon_pilon-augustus-gene-0.29-mRNA-1	exigua_EL1	exigua_F	870.158	85.2725	477.715	3.28433	0.189433	17.3376	2.44666e-67	9.36876e-66
1	augustus_masked-tulip_contig_704_pilon_pilon-processed-gene-2.110-mRNA-1	exigua_EL1	exigua_F	648.68	23.3378	336.009	4.86753	0.280808	17.334	2.60608e-67	9.94763e-66
3	augustus_masked-tulip_contig_234_pilon_pilon-processed-gene-5.59-mRNA-1	exigua_EL1	exigua_F	818.134	63.3886	440.761	3.57996	0.206756	17.3149	3.63168e-67	1.38187e-65
1	maker-tulip_contig_43_pilon_pilon-augustus-gene-3.13-mRNA-1	exigua_EL1	exigua_F	11.425	522.108	266.766	-5.51618	0.318847	-17.3004	4.67284e-67	1.77245e-65
5	maker-tulip_contig_674_pilon_pilon-augustus-gene-1.39-mRNA-1	exigua_EL1	exigua_F	845.489	83.3817	464.435	3.29524	0.190486	17.2991	4.77978e-67	1.80733e-65
1	maker-tulip_contig_216_pilon_pilon-augustus-gene-0.41-mRNA-1	exigua_EL1	exigua_F	836.642	82.4386	459.54	3.3671	0.194782	17.2865	5.94998e-67	2.24277e-65
1	maker-tulip_contig_153_pilon_pilon-augustus-gene-1.10-mRNA-1	exigua_EL1	exigua_F	418.243	9.22831	213.736	5.77553	0.334457	17.2684	8.13863e-67	3.0582e-65
6	maker-tulip_contig_839_pilon_pilon-augustus-gene-1.33-mRNA-1	exigua_EL1	exigua_F	1377.59	1.51091	689.55	9.44136	0.547363	17.2488	1.14198e-66	4.27781e-65
12	augustus_masked-tulip_contig_59_pilon_pilon-processed-gene-1.10-mRNA-1	exigua_EL1	exigua_F	1.63653	4361.66	2181.65	-11.3811	0.660005	-17.244	1.24193e-66	4.63781e-65
5	augustus_masked-tulip_contig_468_pilon_pilon-processed-gene-1.54-mRNA-1	exigua_EL1	exigua_F	794.84	56.064	425.452	3.75819	0.218288	17.2167	1.9906e-66	7.41068e-65
7	maker-tulip_contig_507_pilon_pilon-augustus-gene-0.57-mRNA-1	exigua_EL1	exigua_F	272.746	2990.62	1631.68	-3.45296	0.200714	-17.2034	2.50248e-66	9.28767e-65
1	maker-tulip_contig_145_pilon_pilon-augustus-gene-6.29-mRNA-1	exigua_EL1	exigua_F	49.8731	881.816	465.844	-4.14491	0.240963	-17.2014	2.59177e-66	9.58956e-65
1	augustus_masked-tulip_contig_362_pilon_pilon-processed-gene-2.4-mRNA-1	exigua_EL1	exigua_F	1061.97	84.9434	573.455	3.7486	0.218003	17.1952	2.88521e-66	1.06426e-64
1	maker-tulip_contig_181_pilon_pilon-augustus-gene-1.21-mRNA-1	exigua_EL1	exigua_F	94.6055	877.015	485.81	-3.21311	0.187107	-17.1726	4.26213e-66	1.56737e-64
1	augustus_masked-tulip_contig_289_pilon_pilon-processed-gene-0.7-mRNA-1	exigua_EL1	exigua_F	748.59	2.26636	375.428	7.97787	0.464699	17.1678	4.62321e-66	1.69499e-64
1	maker-tulip_contig_505_pilon_pilon-augustus-gene-3.78-mRNA-1	exigua_EL1	exigua_F	483.894	7.26353	245.579	5.62861	0.328036	17.1585	5.42847e-66	1.98419e-64
1	maker-tulip_contig_67_pilon_pilon-augustus-gene-0.0-mRNA-1	exigua_EL1	exigua_F	533.825	11.6048	272.715	5.89276	0.343442	17.1579	5.48206e-66	1.99772e-64
7	maker-tulip_contig_505_pilon_pilon-augustus-gene-0.14-mRNA-1	exigua_EL1	exigua_F	281.205	3666.48	1973.84	-3.70375	0.216153	-17.1349	8.15491e-66	2.96279e-64
1	maker-tulip_contig_634_pilon_pilon-augustus-gene-0.1-mRNA-1	exigua_EL1	exigua_F	22.5217	431.597	227.059	-4.2539	0.248505	-17.1179	1.09054e-65	3.95018e-64
12	augustus_masked-tulip_contig_260_pilon_pilon-processed-gene-0.48-mRNA-1	exigua_EL1	exigua_F	1.61441	4203.43	2102.52	-11.3279	0.664367	-17.0506	3.45861e-65	1.24904e-63
3	maker-tulip_contig_338_pilon_pilon-augustus-gene-0.0-mRNA-1	exigua_EL1	exigua_F	141.023	1093.01	617.018	-2.95638	0.173454	-17.0441	3.86374e-65	1.39118e-63
1	maker-tulip_contig_781_pilon_pilon-augustus-gene-4.18-mRNA-1	exigua_EL1	exigua_F	25.3162	740.213	382.764	-4.87168	0.286233	-17.02	5.83869e-65	2.09602e-63
1	maker-tulip_contig_44_pilon_pilon-augustus-gene-6.38-mRNA-1	exigua_EL1	exigua_F	1242.42	91.7072	667.063	3.77085	0.222246	16.967	1.44007e-64	5.15434e-63
9	maker-tulip_contig_610_pilon_pilon-augustus-gene-2.11-mRNA-1	exigua_EL1	exigua_F	410.934	8154.73	4282.83	-4.31011	0.254208	-16.9551	1.76465e-64	6.29699e-63
3	maker-tulip_contig_837_pilon_pilon-augustus-gene-6.16-mRNA-1	exigua_EL1	exigua_F	499.37	34.0174	266.694	3.92668	0.231595	16.9549	1.76976e-64	6.29699e-63
5	augustus_masked-tulip_contig_1_pilon_pilon-processed-gene-1.7-mRNA-1	exigua_EL1	exigua_F	6.20944	610.18	308.195	-6.63099	0.391697	-16.9289	2.75575e-64	9.77643e-63
6	maker-tulip_contig_566_pilon_pilon-augustus-gene-1.8-mRNA-1	exigua_EL1	exigua_F	2312.77	2.08922	1157.43	10.5818	0.625277	16.9233	3.02837e-64	1.07121e-62
1	maker-tulip_contig_666_pilon_pilon-augustus-gene-0.1-mRNA-1	exigua_EL1	exigua_F	821.768	4.495	413.131	8.34604	0.493245	16.9207	3.16818e-64	1.11738e-62
7	augustus_masked-tulip_contig_450_pilon_pilon-processed-gene-1.16-mRNA-1	exigua_EL1	exigua_F	2.60684	1514.98	758.793	-9.18182	0.543997	-16.8784	6.48451e-64	2.28035e-62
1	maker-tulip_contig_837_pilon_pilon-augustus-gene-7.30-mRNA-1	exigua_EL1	exigua_F	766.068	28.9085	397.488	4.7443	0.281112	16.8769	6.65485e-64	2.33345e-62
1	maker-tulip_contig_303_pilon_pilon-augustus-gene-0.40-mRNA-1	exigua_EL1	exigua_F	1130.47	134.994	632.734	3.04076	0.18028	16.8668	7.89209e-64	2.75926e-62
1	augustus_masked-tulip_contig_566_pilon_pilon-processed-gene-2.32-mRNA-1	exigua_EL1	exigua_F	595.186	47.1778	321.182	3.63227	0.215357	16.8663	7.96296e-64	2.77599e-62
6	maker-tulip_contig_345_pilon_pilon-augustus-gene-0.20-mRNA-1	exigua_EL1	exigua_F	820.398	2.29562	411.347	8.21592	0.487188	16.864	8.28348e-64	2.87686e-62
1	maker-tulip_contig_182_pilon_pilon-augustus-gene-0.8-mRNA-1	exigua_EL1	exigua_F	374.971	5.98247	190.477	5.76602	0.341916	16.8639	8.3e-64	2.87686e-62
4	augustus_masked-tulip_contig_363_pilon_pilon-processed-gene-0.6-mRNA-1	exigua_EL1	exigua_F	1461.37	87.7985	774.587	3.99757	0.23712	16.8588	9.03423e-64	3.12237e-62
1	maker-tulip_contig_837_pilon_pilon-augustus-gene-8.59-mRNA-1	exigua_EL1	exigua_F	428.752	8.09777	218.425	5.83883	0.346341	16.8586	9.06854e-64	3.12528e-62
3	augustus_masked-tulip_contig_571_pilon_pilon-processed-gene-0.5-mRNA-1	exigua_EL1	exigua_F	767.372	48.327	407.849	4.034	0.239321	16.856	9.47955e-64	3.25762e-62
1	augustus_masked-tulip_contig_636_pilon_pilon-processed-gene-0.15-mRNA-1	exigua_EL1	exigua_F	415.362	8.07115	211.717	5.53928	0.328697	16.8523	1.00984e-63	3.46043e-62
9	maker-tulip_contig_356_pilon_pilon-augustus-gene-1.49-mRNA-1	exigua_EL1	exigua_F	5.85088	747.035	376.443	-6.97739	0.414183	-16.8462	1.11935e-63	3.8248e-62
6	maker-tulip_contig_926_pilon_pilon-augustus-gene-0.23-mRNA-1	exigua_EL1	exigua_F	2553.1	1.04593	1277.07	10.7563	0.63853	16.8454	1.13341e-63	3.86193e-62
5	maker-tulip_contig_694_pilon_pilon-augustus-gene-0.14-mRNA-1	exigua_EL1	exigua_F	554.931	52.8017	303.866	3.40866	0.202522	16.831	1.44545e-63	4.91126e-62
3	maker-tulip_contig_320_pilon_pilon-augustus-gene-0.1-mRNA-1	exigua_EL1	exigua_F	2060.17	392.678	1226.43	2.38422	0.141709	16.8247	1.60761e-63	5.4469e-62
12	maker-tulip_contig_200_pilon_pilon-augustus-gene-0.10-mRNA-1	exigua_EL1	exigua_F	4.56625	662.215	333.391	-7.18152	0.427004	-16.8184	1.78923e-63	6.0453e-62
1	maker-tulip_contig_19_pilon_pilon-augustus-gene-0.0-mRNA-1	exigua_EL1	exigua_F	14.0709	481.016	247.543	-5.09123	0.302999	-16.8028	2.32738e-63	7.84157e-62
3	augustus_masked-tulip_contig_547_pilon_pilon-processed-gene-3.38-mRNA-1	exigua_EL1	exigua_F	384.761	19.0695	201.915	4.45531	0.2652	16.7998	2.45001e-63	8.23176e-62
11	augustus_masked-tulip_contig_218_pilon_pilon-processed-gene-1.9-mRNA-1	exigua_EL1	exigua_F	685.937	12.4012	349.169	5.63312	0.335478	16.7913	2.8263e-63	9.46967e-62
1	maker-tulip_contig_408_pilon_pilon-augustus-gene-0.25-mRNA-1	exigua_EL1	exigua_F	488.668	5.04987	246.859	6.76499	0.402912	16.7903	2.87614e-63	9.60998e-62
1	augustus_masked-tulip_contig_407_pilon_pilon-processed-gene-9.16-mRNA-1	exigua_EL1	exigua_F	515.182	8.06851	261.625	6.07354	0.362154	16.7706	4.00258e-63	1.33368e-61
1	maker-tulip_contig_704_pilon_pilon-augustus-gene-2.62-mRNA-1	exigua_EL1	exigua_F	605.69	22.8557	314.273	4.59797	0.274345	16.7598	4.80005e-63	1.59499e-61
1	maker-tulip_contig_230_pilon_pilon-augustus-gene-0.51-mRNA-1	exigua_EL1	exigua_F	1496.16	1.97588	749.07	9.23036	0.55097	16.7529	5.39215e-63	1.78682e-61
3	maker-tulip_contig_192_pilon_pilon-augustus-gene-1.61-mRNA-1	exigua_EL1	exigua_F	470.853	14.2521	242.553	5.14929	0.308086	16.7138	1.03942e-62	3.43491e-61
4	maker-tulip_contig_276_pilon_pilon-augustus-gene-3.65-mRNA-1	exigua_EL1	exigua_F	4515.8	469.564	2492.68	3.25794	0.195121	16.6971	1.37695e-62	4.53791e-61
1	maker-tulip_contig_126_pilon_pilon-augustus-gene-1.59-mRNA-1	exigua_EL1	exigua_F	417.742	15.6491	216.696	4.66702	0.280032	16.666	2.31593e-62	7.61165e-61
1	maker-tulip_contig_429_pilon_pilon-augustus-gene-3.52-mRNA-1	exigua_EL1	exigua_F	512.26	24.9562	268.608	4.57652	0.274634	16.6641	2.39198e-62	7.84023e-61
1	maker-tulip_contig_516_pilon_pilon-augustus-gene-3.7-mRNA-1	exigua_EL1	exigua_F	75.2466	741.15	408.198	-3.29418	0.197857	-16.6493	3.05994e-62	1.00024e-60
5	maker-tulip_contig_248_pilon_pilon-augustus-gene-0.16-mRNA-1	exigua_EL1	exigua_F	14205.6	2297.29	8251.43	2.62295	0.157567	16.6466	3.20127e-62	1.04361e-60
1	maker-tulip_contig_586_pilon_pilon-augustus-gene-3.15-mRNA-1	exigua_EL1	exigua_F	662.293	2.12112	332.207	7.92294	0.4765	16.6274	4.41646e-62	1.43589e-60
12	augustus_masked-tulip_contig_854_pilon_pilon-processed-gene-1.74-mRNA-1	exigua_EL1	exigua_F	20.2736	450.876	235.575	-4.47536	0.269227	-16.623	4.74974e-62	1.54009e-60
1	augustus_masked-tulip_contig_815_pilon_pilon-processed-gene-1.55-mRNA-1	exigua_EL1	exigua_F	115.848	883.171	499.509	-2.9257	0.176086	-16.6151	5.41681e-62	1.75168e-60
1	augustus_masked-tulip_contig_3_pilon_pilon-processed-gene-3.5-mRNA-1	exigua_EL1	exigua_F	428.224	12.9763	220.6	5.06771	0.305841	16.5697	1.15313e-61	3.71899e-60
1	maker-tulip_contig_208_pilon_pilon-augustus-gene-1.124-mRNA-1	exigua_EL1	exigua_F	396.553	8.53349	202.543	5.59958	0.337985	16.5676	1.19591e-61	3.84668e-60
8	maker-tulip_contig_603_pilon_pilon-augustus-gene-3.72-mRNA-1	exigua_EL1	exigua_F	15.0207	394.339	204.68	-4.71014	0.284484	-16.5568	1.4309e-61	4.59029e-60
1	maker-tulip_contig_128_pilon_pilon-augustus-gene-0.7-mRNA-1	exigua_EL1	exigua_F	6.19588	485.913	246.055	-6.29108	0.380086	-16.5517	1.55636e-61	4.97952e-60
1	maker-tulip_contig_623_pilon_pilon-augustus-gene-3.55-mRNA-1	exigua_EL1	exigua_F	45.4072	554.153	299.78	-3.59619	0.217432	-16.5394	1.90953e-61	6.09331e-60
-	maker-tulip_contig_781_pilon_pilon-augustus-gene-6.45-mRNA-1	exigua_EL1	exigua_F	593.959	47.4081	320.684	3.65633	0.221098	16.5371	1.98222e-61	6.30858e-60
9	maker-tulip_contig_704_pilon_pilon-augustus-gene-2.26-mRNA-1	exigua_EL1	exigua_F	40.7401	1122.8	581.771	-4.78811	0.28972	-16.5267	2.35723e-61	7.48233e-60
1	maker-tulip_contig_37_pilon_pilon-augustus-gene-1.10-mRNA-1	exigua_EL1	exigua_F	393.555	7.22898	200.392	5.72738	0.346639	16.5226	2.5212e-61	7.98182e-60
1	augustus_masked-tulip_contig_168_pilon_pilon-processed-gene-1.38-mRNA-1	exigua_EL1	exigua_F	422.82	10.4456	216.633	5.65099	0.342562	16.4963	3.90313e-61	1.23245e-59
8	augustus_masked-tulip_contig_272_pilon_pilon-processed-gene-1.21-mRNA-1	exigua_EL1	exigua_F	4.57125	598.114	301.342	-7.03536	0.426551	-16.4936	4.07874e-61	1.28454e-59
1	augustus_masked-tulip_contig_691_pilon_pilon-processed-gene-3.25-mRNA-1	exigua_EL1	exigua_F	493.757	18.4097	256.083	4.64559	0.281878	16.4808	5.03897e-61	1.58282e-59
1	maker-tulip_contig_604_pilon_pilon-augustus-gene-2.4-mRNA-1	exigua_EL1	exigua_F	10.4442	420.443	215.444	-5.3157	0.323106	-16.4519	8.13415e-61	2.54842e-59
1	maker-tulip_contig_827_pilon_pilon-augustus-gene-2.88-mRNA-1	exigua_EL1	exigua_F	168.66	1065.68	617.171	-2.65652	0.161681	-16.4306	1.15469e-60	3.60824e-59
3	maker-tulip_contig_1_pilon_pilon-augustus-gene-2.9-mRNA-1	exigua_EL1	exigua_F	2633	370.618	1501.81	2.81653	0.171457	16.427	1.22585e-60	3.82073e-59
6	augustus_masked-tulip_contig_845_pilon_pilon-processed-gene-0.13-mRNA-1	exigua_EL1	exigua_F	3528.13	0.755454	1764.44	11.777	0.717014	16.4251	1.26424e-60	3.93023e-59
3	augustus_masked-tulip_contig_236_pilon_pilon-processed-gene-4.10-mRNA-1	exigua_EL1	exigua_F	392.492	9.34957	200.921	5.21324	0.317791	16.4046	1.77242e-60	5.49588e-59
1	maker-tulip_contig_867_pilon_pilon-augustus-gene-3.33-mRNA-1	exigua_EL1	exigua_F	402.7	1873.94	1138.32	-2.21865	0.135396	-16.3863	2.39458e-60	7.40599e-59
1	maker-tulip_contig_671_pilon_pilon-augustus-gene-0.41-mRNA-1	exigua_EL1	exigua_F	380.089	10.2476	195.168	5.17271	0.315712	16.3843	2.47733e-60	7.64235e-59
5	maker-tulip_contig_378_pilon_pilon-augustus-gene-3.1-mRNA-1	exigua_EL1	exigua_F	1427.75	124.192	775.973	3.50942	0.214513	16.3599	3.69592e-60	1.13725e-58
1	maker-tulip_contig_705_pilon_pilon-augustus-gene-0.4-mRNA-1	exigua_EL1	exigua_F	693.478	75.2015	384.34	3.14115	0.192178	16.345	4.72402e-60	1.4499e-58
6	maker-tulip_contig_2_pilon_pilon-augustus-gene-5.28-mRNA-1	exigua_EL1	exigua_F	6430.98	0.610215	3215.79	13.021	0.796999	16.3375	5.33768e-60	1.63409e-58
3	maker-tulip_contig_195_pilon_pilon-augustus-gene-0.24-mRNA-1	exigua_EL1	exigua_F	1425.62	252.769	839.194	2.51527	0.154071	16.3254	6.51484e-60	1.98942e-58
6	maker-tulip_contig_707_pilon_pilon-augustus-gene-0.23-mRNA-1	exigua_EL1	exigua_F	782.056	2.12112	392.088	8.16343	0.500121	16.3229	6.78179e-60	2.06571e-58
5	maker-tulip_contig_745_pilon_pilon-augustus-gene-3.9-mRNA-1	exigua_EL1	exigua_F	9624.19	1555.09	5589.64	2.63517	0.161468	16.3201	7.10339e-60	2.15821e-58
7	maker-tulip_contig_636_pilon_pilon-augustus-gene-0.16-mRNA-1	exigua_EL1	exigua_F	5.21345	661.543	333.378	-6.97507	0.427542	-16.3143	7.80379e-60	2.36506e-58
1	maker-tulip_contig_126_pilon_pilon-augustus-gene-1.68-mRNA-1	exigua_EL1	exigua_F	95.437	658.34	376.888	-2.78558	0.170852	-16.304	9.23984e-60	2.79326e-58
1	maker-tulip_contig_610_pilon_pilon-augustus-gene-3.29-mRNA-1	exigua_EL1	exigua_F	542.589	2682.37	1612.48	-2.3043	0.141335	-16.3038	9.27015e-60	2.79541e-58
1	maker-tulip_contig_473_pilon_pilon-augustus-gene-2.15-mRNA-1	exigua_EL1	exigua_F	376.251	9.83535	193.043	5.62519	0.345165	16.2971	1.0344e-59	3.11146e-58
4	maker-tulip_contig_3_pilon_pilon-augustus-gene-5.37-mRNA-1	exigua_EL1	exigua_F	849.121	1.5689	425.345	8.58508	0.527464	16.2761	1.45785e-59	4.37428e-58
5	augustus_masked-tulip_contig_671_pilon_pilon-processed-gene-0.33-mRNA-1	exigua_EL1	exigua_F	672.073	77.7253	374.899	3.04645	0.187276	16.2672	1.68704e-59	5.04941e-58
1	augustus_masked-tulip_contig_550_pilon_pilon-processed-gene-0.23-mRNA-1	exigua_EL1	exigua_F	74.1721	646.958	360.565	-3.12685	0.192458	-16.2469	2.34881e-59	7.01272e-58
1	maker-tulip_contig_166_pilon_pilon-augustus-gene-0.2-mRNA-1	exigua_EL1	exigua_F	76.5174	735.458	405.988	-3.2553	0.20038	-16.2457	2.39742e-59	7.14016e-58
5	maker-tulip_contig_527_pilon_pilon-augustus-gene-3.36-mRNA-1	exigua_EL1	exigua_F	1878.12	332.703	1105.41	2.49689	0.153866	16.2277	3.21368e-59	9.54765e-58
1	maker-tulip_contig_482_pilon_pilon-augustus-gene-1.38-mRNA-1	exigua_EL1	exigua_F	349.883	7.08639	178.485	5.36425	0.331579	16.1779	7.22147e-59	2.14018e-57
1	maker-tulip_contig_44_pilon_pilon-augustus-gene-1.17-mRNA-1	exigua_EL1	exigua_F	579.488	40.3345	309.911	3.72429	0.230505	16.1571	1.01158e-58	2.9906e-57
1	maker-tulip_contig_654_pilon_pilon-augustus-gene-1.68-mRNA-1	exigua_EL1	exigua_F	453.849	4.41357	229.131	6.58892	0.408034	16.148	1.17368e-58	3.46135e-57
1	augustus_masked-tulip_contig_60_pilon_pilon-processed-gene-1.4-mRNA-1	exigua_EL1	exigua_F	469.758	41.0208	255.39	3.51202	0.217696	16.1327	1.50322e-58	4.41165e-57
1	maker-tulip_contig_640_pilon_pilon-augustus-gene-2.8-mRNA-1	exigua_EL1	exigua_F	786.902	28.1041	407.503	4.72596	0.293105	16.1238	1.73722e-58	5.08599e-57
4	maker-tulip_contig_60_pilon_pilon-augustus-gene-0.17-mRNA-1	exigua_EL1	exigua_F	2631.13	251.085	1441.11	3.39403	0.21076	16.1038	2.40026e-58	7.01015e-57
1	maker-tulip_contig_628_pilon_pilon-augustus-gene-4.62-mRNA-1	exigua_EL1	exigua_F	1561.49	330.453	945.974	2.23257	0.138744	16.0913	2.93799e-58	8.55992e-57
1	augustus_masked-tulip_contig_688_pilon_pilon-processed-gene-0.1-mRNA-1	exigua_EL1	exigua_F	418.154	27.8178	222.986	3.80503	0.23654	16.0862	3.18914e-58	9.26925e-57
1	maker-tulip_contig_133_pilon_pilon-augustus-gene-1.34-mRNA-1	exigua_EL1	exigua_F	370.068	4.00976	187.039	6.15535	0.382833	16.0784	3.61406e-58	1.0479e-56
3	maker-tulip_contig_773_pilon_pilon-augustus-gene-2.31-mRNA-1	exigua_EL1	exigua_F	763.81	48.6855	406.248	3.95878	0.24643	16.0645	4.52551e-58	1.30903e-56
1	maker-tulip_contig_616_pilon_pilon-augustus-gene-0.0-mRNA-1	exigua_EL1	exigua_F	286.032	2575.29	1430.66	-3.17069	0.197381	-16.0638	4.5771e-58	1.32079e-56
1	maker-tulip_contig_104_pilon_pilon-augustus-gene-0.27-mRNA-1	exigua_EL1	exigua_F	373.429	11.2329	192.331	5.14739	0.320708	16.0501	5.71016e-58	1.64382e-56
5	maker-tulip_contig_362_pilon_pilon-augustus-gene-7.12-mRNA-1	exigua_EL1	exigua_F	2060.18	223.476	1141.83	3.16938	0.197476	16.0494	5.76979e-58	1.65703e-56
4	maker-tulip_contig_698_pilon_pilon-augustus-gene-4.12-mRNA-1	exigua_EL1	exigua_F	809.035	103.691	456.363	2.96168	0.184714	16.0338	7.41655e-58	2.1249e-56
1	maker-tulip_contig_645_pilon_pilon-augustus-gene-2.9-mRNA-1	exigua_EL1	exigua_F	407.663	13.5046	210.584	4.69059	0.292547	16.0336	7.44225e-58	2.12721e-56
4	maker-tulip_contig_666_pilon_pilon-augustus-gene-2.22-mRNA-1	exigua_EL1	exigua_F	471.516	12.1102	241.813	5.09621	0.317982	16.0267	8.31541e-58	2.37117e-56
7	augustus_masked-tulip_contig_31_pilon_pilon-processed-gene-0.32-mRNA-1	exigua_EL1	exigua_F	462.446	5377.85	2920.15	-3.53977	0.221088	-16.0107	1.07579e-57	3.06043e-56
6	augustus_masked-tulip_contig_226_pilon_pilon-processed-gene-0.54-mRNA-1	exigua_EL1	exigua_F	1165.58	1.45292	583.515	9.38016	0.588308	15.9443	3.12102e-57	8.85782e-56
3	maker-tulip_contig_196_pilon_pilon-augustus-gene-4.29-mRNA-1	exigua_EL1	exigua_F	507.289	40.6628	273.976	3.72015	0.233713	15.9176	4.78233e-57	1.34902e-55
1	augustus_masked-tulip_contig_112_pilon_pilon-processed-gene-2.57-mRNA-1	exigua_EL1	exigua_F	609.353	4.23643	306.795	7.53067	0.473105	15.9176	4.78677e-57	1.34902e-55
1	maker-tulip_contig_257_pilon_pilon-augustus-gene-0.1-mRNA-1	exigua_EL1	exigua_F	393.977	10.745	202.361	5.0711	0.319293	15.8823	8.40732e-57	2.36385e-55
1	maker-tulip_contig_59_pilon_pilon-augustus-gene-1.32-mRNA-1	exigua_EL1	exigua_F	94.9467	767.911	431.429	-3.01114	0.18997	-15.8506	1.39229e-56	3.90553e-55
6	maker-tulip_contig_916_pilon_pilon-augustus-gene-2.69-mRNA-1	exigua_EL1	exigua_F	1923.3	0.813443	962.056	10.6051	0.670237	15.8229	2.1616e-56	6.04947e-55
1	augustus_masked-tulip_contig_603_pilon_pilon-processed-gene-4.47-mRNA-1	exigua_EL1	exigua_F	422.053	8.47814	215.265	5.515	0.349197	15.7934	3.45703e-56	9.65248e-55
1	augustus_masked-tulip_contig_762_pilon_pilon-processed-gene-0.10-mRNA-1	exigua_EL1	exigua_F	2210.84	431.985	1321.41	2.33898	0.148133	15.7897	3.66128e-56	1.01992e-54
3	maker-tulip_contig_669_pilon_pilon-augustus-gene-2.113-mRNA-1	exigua_EL1	exigua_F	382.144	5.04987	193.597	6.4097	0.406569	15.7653	5.38823e-56	1.49753e-54
1	augustus_masked-tulip_contig_280_pilon_pilon-processed-gene-1.8-mRNA-1	exigua_EL1	exigua_F	79.5597	1033.27	556.416	-3.69928	0.234796	-15.7553	6.31662e-56	1.75152e-54
1	maker-tulip_contig_673_pilon_pilon-augustus-gene-0.100-mRNA-1	exigua_EL1	exigua_F	452.86	9.32031	231.09	5.41472	0.343729	15.7529	6.56357e-56	1.81582e-54
8	maker-tulip_contig_597_pilon_pilon-augustus-gene-3.10-mRNA-1	exigua_EL1	exigua_F	40.105	567.392	303.748	-3.80983	0.242258	-15.7263	9.98109e-56	2.75496e-54
1	augustus_masked-tulip_contig_448_pilon_pilon-processed-gene-2.49-mRNA-1	exigua_EL1	exigua_F	381.984	13.1242	197.554	4.75326	0.3026	15.7081	1.33163e-55	3.66716e-54
1	augustus_masked-tulip_contig_126_pilon_pilon-processed-gene-0.47-mRNA-1	exigua_EL1	exigua_F	2439.82	321.34	1380.58	2.89772	0.184493	15.7064	1.36707e-55	3.75617e-54
1	maker-tulip_contig_236_pilon_pilon-augustus-gene-8.40-mRNA-1	exigua_EL1	exigua_F	600.84	49.3405	325.09	3.71984	0.236952	15.6987	1.54377e-55	4.23205e-54
4	augustus_masked-tulip_contig_60_pilon_pilon-processed-gene-0.8-mRNA-1	exigua_EL1	exigua_F	1433.55	176.525	805.038	3.01962	0.192584	15.6795	2.08741e-55	5.70851e-54
1	maker-tulip_contig_547_pilon_pilon-augustus-gene-2.0-mRNA-1	exigua_EL1	exigua_F	124.2	736.365	430.283	-2.56843	0.163809	-15.6794	2.09183e-55	5.70851e-54
1	maker-tulip_contig_281_pilon_pilon-augustus-gene-3.24-mRNA-1	exigua_EL1	exigua_F	8.45939	380.722	194.591	-5.48818	0.350283	-15.6679	2.50908e-55	6.83172e-54
5	maker-tulip_contig_229_pilon_pilon-augustus-gene-0.21-mRNA-1	exigua_EL1	exigua_F	8.80416	375.948	192.376	-5.41688	0.345792	-15.6651	2.61868e-55	7.11408e-54
1	maker-tulip_contig_340_pilon_pilon-augustus-gene-0.24-mRNA-1	exigua_EL1	exigua_F	91.0706	686.363	388.717	-2.92358	0.186805	-15.6504	3.3022e-55	8.95083e-54
7	augustus_masked-tulip_contig_507_pilon_pilon-processed-gene-0.15-mRNA-1	exigua_EL1	exigua_F	39.1038	796.106	417.605	-4.33587	0.277141	-15.645	3.59472e-55	9.72187e-54
1	maker-tulip_contig_196_pilon_pilon-augustus-gene-2.0-mRNA-1	exigua_EL1	exigua_F	94.9197	1155.17	625.046	-3.60829	0.230755	-15.6369	4.08326e-55	1.10184e-53
1	augustus_masked-tulip_contig_895_pilon_pilon-processed-gene-3.38-mRNA-1	exigua_EL1	exigua_F	404.298	5.08177	204.69	6.15766	0.394233	15.6193	5.37665e-55	1.44761e-53
9	augustus_masked-tulip_contig_781_pilon_pilon-processed-gene-1.3-mRNA-1	exigua_EL1	exigua_F	22.3265	645.93	334.128	-4.85423	0.31101	-15.6079	6.42831e-55	1.72691e-53
1	augustus_masked-tulip_contig_329_pilon_pilon-processed-gene-0.32-mRNA-1	exigua_EL1	exigua_F	594.984	86.0482	340.516	2.78031	0.178627	15.5649	1.26079e-54	3.37948e-53
1	maker-tulip_contig_807_pilon_pilon-augustus-gene-3.36-mRNA-1	exigua_EL1	exigua_F	459.525	16.8318	238.179	4.93531	0.317409	15.5487	1.62278e-54	4.34012e-53
1	maker-tulip_contig_31_pilon_pilon-augustus-gene-1.52-mRNA-1	exigua_EL1	exigua_F	419.358	3.63203	211.495	6.4815	0.417182	15.5364	1.96764e-54	5.25081e-53
7	maker-tulip_contig_182_pilon_pilon-augustus-gene-1.40-mRNA-1	exigua_EL1	exigua_F	2.94328	757.699	380.321	-7.99959	0.514941	-15.535	2.01206e-54	5.35751e-53
1	maker-tulip_contig_81_pilon_pilon-augustus-gene-2.14-mRNA-1	exigua_EL1	exigua_F	372.14	5.77342	188.957	6.43679	0.414695	15.5217	2.47259e-54	6.56926e-53
1	maker-tulip_contig_293_pilon_pilon-augustus-gene-0.0-mRNA-1	exigua_EL1	exigua_F	350.906	9.92524	180.415	5.28809	0.341185	15.4992	3.51348e-54	9.31419e-53
14	maker-tulip_contig_192_pilon_pilon-augustus-gene-1.175-mRNA-1	exigua_EL1	exigua_F	1.32221	3524.79	1763.06	-11.3987	0.737165	-15.4629	6.17191e-54	1.63258e-52
3	augustus_masked-tulip_contig_362_pilon_pilon-processed-gene-6.33-mRNA-1	exigua_EL1	exigua_F	537.06	54.402	295.731	3.3315	0.215589	15.453	7.2008e-54	1.90057e-52
14	augustus_masked-tulip_contig_674_pilon_pilon-processed-gene-12.9-mRNA-1	exigua_EL1	exigua_F	16.6606	523.047	269.854	-4.97844	0.322358	-15.4438	8.30268e-54	2.18661e-52
3	maker-tulip_contig_323_pilon_pilon-augustus-gene-1.11-mRNA-1	exigua_EL1	exigua_F	2235.86	385.739	1310.8	2.51086	0.162605	15.4415	8.61346e-54	2.26352e-52
7	augustus_masked-tulip_contig_55_pilon_pilon-processed-gene-1.16-mRNA-1	exigua_EL1	exigua_F	81.2403	762.796	422.018	-3.23242	0.209406	-15.4361	9.35368e-54	2.4527e-52
1	maker-tulip_contig_323_pilon_pilon-augustus-gene-4.23-mRNA-1	exigua_EL1	exigua_F	644.029	37.5351	340.782	4.13896	0.268221	15.4312	1.0099e-53	2.6424e-52
1	maker-tulip_contig_640_pilon_pilon-augustus-gene-2.21-mRNA-1	exigua_EL1	exigua_F	395.288	3.19314	199.24	6.9413	0.450189	15.4186	1.22655e-53	3.20229e-52
1	maker-tulip_contig_271_pilon_pilon-augustus-gene-2.53-mRNA-1	exigua_EL1	exigua_F	363.718	9.28894	186.503	5.31194	0.345288	15.3841	2.09239e-53	5.4393e-52
4	augustus_masked-tulip_contig_82_pilon_pilon-processed-gene-1.0-mRNA-1	exigua_EL1	exigua_F	640.287	1.83065	321.059	8.15448	0.53048	15.3719	2.52749e-53	6.55625e-52
-	maker-tulip_contig_327_pilon_pilon-augustus-gene-7.15-mRNA-1	exigua_EL1	exigua_F	374.42	13.1503	193.785	4.81868	0.313714	15.3601	3.03141e-53	7.84654e-52
1	maker-tulip_contig_218_pilon_pilon-augustus-gene-2.0-mRNA-1	exigua_EL1	exigua_F	380.777	14.0196	197.398	4.87064	0.317107	15.3596	3.05419e-53	7.88858e-52
3	maker-tulip_contig_407_pilon_pilon-augustus-gene-9.78-mRNA-1	exigua_EL1	exigua_F	664.27	41.0027	352.636	3.90445	0.254247	15.3569	3.18421e-53	8.20684e-52
1	maker-tulip_contig_69_pilon_pilon-augustus-gene-0.24-mRNA-1	exigua_EL1	exigua_F	311.524	9.6672	160.596	5.08581	0.331348	15.3489	3.60395e-53	9.26883e-52
3	maker-tulip_contig_860_pilon_pilon-augustus-gene-1.9-mRNA-1	exigua_EL1	exigua_F	3556.58	570.205	2063.39	2.62358	0.171513	15.2967	8.04843e-53	2.06554e-51
1	maker-tulip_contig_212_pilon_pilon-augustus-gene-0.21-mRNA-1	exigua_EL1	exigua_F	475.566	2.75742	239.162	7.5763	0.495439	15.2921	8.63149e-53	2.21047e-51
1	maker-tulip_contig_553_pilon_pilon-augustus-gene-0.81-mRNA-1	exigua_EL1	exigua_F	50.2806	458.443	254.362	-3.18703	0.208428	-15.2908	8.8082e-53	2.25094e-51
1	maker-tulip_contig_1_pilon_pilon-augustus-gene-3.9-mRNA-1	exigua_EL1	exigua_F	294.788	7.63544	151.212	5.15705	0.33799	15.258	1.45636e-52	3.71386e-51
6	maker-tulip_contig_638_pilon_pilon-augustus-gene-0.0-mRNA-1	exigua_EL1	exigua_F	1593.52	0.958682	797.237	10.0952	0.661834	15.2534	1.56341e-52	3.97846e-51
5	augustus_masked-tulip_contig_781_pilon_pilon-processed-gene-0.4-mRNA-1	exigua_EL1	exigua_F	6267.75	973.798	3620.78	2.6863	0.176262	15.2404	1.90748e-52	4.8438e-51
5	maker-tulip_contig_531_pilon_pilon-augustus-gene-5.38-mRNA-1	exigua_EL1	exigua_F	3.91359	576.44	290.177	-7.18603	0.471531	-15.2398	1.92457e-52	4.87693e-51
[truncated: 2,613 more rows]

## Sheet: EL1-VS-L3
cluster	gene	sampleA	sampleB	baseMeanA	baseMeanB	baseMean	log2FoldChange	lfcSE	stat	pvalue	padj
[truncated: 1,222 more rows]

[truncated: 12 more sheets: EL1-VS-M, EL1-VS-P, F-VS-egg, F-VS-L3, F-VS-M, F-VS-P, L3-VS-egg, L3-VS-M, L3-VS-P, M-VS-egg, M-VS-P, P-VS-ei]
